# Supplementary material for: A regioselective [3 + 2] cycloaddition reaction of 2-benzylidene-1-indenones with functional olefins to access indanone-fused 2D/3D skeletons
Source: Royal Society of Chemistry journal article supplement (doi:10.1039/d3ob00559c), 2023-01-01

## Supporting Information

For

**Regioselective [3+2] cycloaddition reaction of 2-benzylidene-1-indenones with functional olefins to access indanone-fused 2D/3D skeletons**

Yi-Hang Deng,<sup>a,†</sup> Chuan-Bao Zhang,<sup>a,b,†</sup> Jun-Jie Sun,<sup>a</sup> Wen-Li Xu,<sup>a</sup> Ji-Ya Fu<sup>a\*</sup>

AUTHOR ADDRESS.

<sup>a</sup> Henan Engineering Research Center of Functional Materials and Catalytic Reaction, College of Chemistry and Chemical Engineering, Henan University, Kaifeng, 475004, China. E-mail: fujiya@126.com.

<sup>b</sup> School of Pharmacy, Zhengzhou Railway Vocational & Technical College, Zhengzhou, China.

<sup>†</sup> This author contributed equally to this work.

## Table of Contents

|                                                                                  |     |
|----------------------------------------------------------------------------------|-----|
| 1. General experimental information.....                                         | S3  |
| 2. Optimization of the reaction conditions.....                                  | S3  |
| 3. General experimental procedures for synthesis of compounds <b>3</b> .....     | S4  |
| 4. General experimental procedures for synthesis of compounds <b>5</b> .....     | S20 |
| 5. Experimental procedures for gram-scale synthesis of compound <b>3da</b> ..... | S29 |
| 6. Procedure for the synthesis of compounds <b>6</b> .....                       | S29 |
| 7. Procedure for the synthesis of compounds <b>7</b> .....                       | S30 |
| 8. Procedure for the synthesis of compounds <b>8</b> .....                       | S31 |
| 9. Procedure for the synthesis of compounds <b>9</b> .....                       | S32 |
| 10. X-ray crystal structure of compound <b>3fa</b> .....                         | S32 |
| 11. X-ray crystal structure of compound <b>5n</b> .....                          | S34 |
| 12. 2D NMR Analysis of <b>3qa</b> , <b>3ra</b> and <b>5n</b> .....               | S37 |
| 13. NMR spectra.....                                                             | S46 |

## 1. General experimental information

Reactions were monitored by TLC and visualization of the developed chromatogram was performed by ultraviolet light. Unless otherwise noted, all reagents including solvents were obtained from commercial supplier without any purification. The forced-flow column chromatography was performed using silica gel eluting with ethyl acetate and petroleum ether. NMR spectra were recorded with tetramethylsilane as the internal standard.  $^1\text{H}$  NMR and  $^{13}\text{C}$  NMR spectra of  $\text{CDCl}_3$  or  $\text{DMSO}-d_6$  solutions were recorded either at 400 and 100 MHz or at 500 and 125 MHz (Bruker Avance), respectively and resonances ( $\delta$ ) are given in parts per million (ppm) relatives to tetramethylsilane (TMS). Data for NMR are reported as follows: chemical shift, multiplicity (s = singlet, d = doublet, t = triplet, m = multiplet), coupling constants (Hz) and integration. High resolution mass spectra were obtained with the Q-TOF-Premier mass spectrometer. The X-ray crystal-structure determinations of **3fa** and **5o** were obtained on a Bruker APEX DUO system. All melting points are determined on a SGW X-4 melting apparatus and are uncorrected. Cinnamaldehyde **2**, witting reagents, 2-thenoyltrifluoroacetone were obtained from commercial supplier and used directly. 2-Benzylideneinden-1-one **1**, 2-benzylidenebenzofuran-3(2H)-one **4** were prepared according to literature reports.<sup>1</sup>

## 2. Optimization of the reaction conditions

**Table S1.** The Screening of solvent and ratio of amount of **1a:2a**<sup>a</sup>

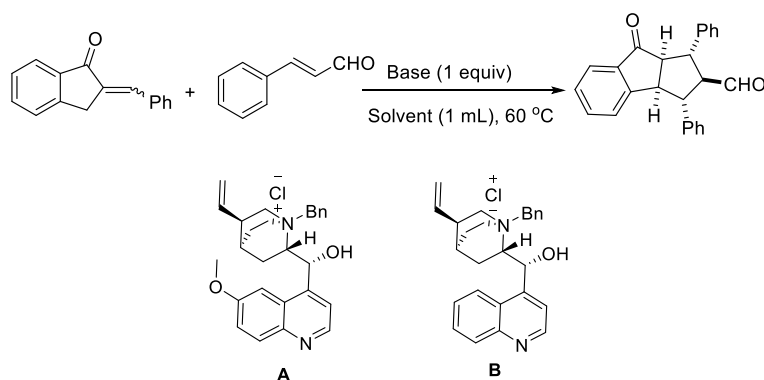

| Entry | Base                  | Solvent | Additive | Time (h) | <b>1a:2a</b> | Yield (%) <sup>b</sup> |
|-------|-----------------------|---------|----------|----------|--------------|------------------------|
| 1     | DBU                   | DMC     | -        | 80       | 1.0:1.0      | n.r.                   |
| 2     | DMAP                  | DMC     | -        | 80       | 1.0:1.0      | n.r.                   |
| 3     | $\text{Et}_3\text{N}$ | DMC     | -        | 80       | 1.0:1.0      | n.r.                   |

|                   |                                 |                    |                                              |    |         |      |
|-------------------|---------------------------------|--------------------|----------------------------------------------|----|---------|------|
| 4                 | PPh <sub>3</sub>                | DMC                | -                                            | 80 | 1.0:1.0 | n.r. |
| 5                 | K <sub>2</sub> CO <sub>3</sub>  | DMC                | -                                            | 80 | 1.0:1.0 | n.r. |
| 6                 | Cs <sub>2</sub> CO <sub>3</sub> | DMC                | -                                            | 80 | 1.0:1.0 | n.r. |
| 7                 | Na <sub>2</sub> CO <sub>3</sub> | DMC                | -                                            | 80 | 1.0:1.0 | n.r. |
| 8                 | NaHCO <sub>3</sub>              | DMC                | -                                            | 80 | 1.0:1.0 | n.r. |
| 9                 | NaOH                            | DMC                | -                                            | 80 | 1.0:1.0 | n.r. |
| 10                | EtONa                           | DMC                | -                                            | 80 | 1.0:1.0 | n.r. |
| 11                | DABCO                           | Toluene            | -                                            | 80 | 1.0:1.0 | n.r. |
| 12                | DABCO                           | DCM                | -                                            | 80 | 1.0:1.0 | n.r. |
| 13                | DABCO                           | CH <sub>3</sub> CN | -                                            | 80 | 1.0:1.0 | n.r. |
| 14                | DABCO                           | THF                | -                                            | 80 | 1.0:1.0 | n.r. |
| 15                | DABCO                           | DMF                | -                                            | 80 | 1.0:1.0 | n.r. |
| 16                | DABCO                           | DMSO               | -                                            | 80 | 1.0:1.0 | n.r. |
| 17                | DABCO                           | DEC                | -                                            | 80 | 1.0:1.0 | n.r. |
| 18                | DABCO                           | DMC                | -                                            | 48 | 1.5:1.0 | 40   |
| 19                | DABCO                           | DMC                | -                                            | 48 | 2.0:1.0 | 32   |
| 20                | DABCO                           | DMC                | -                                            | 48 | 1.0:1.5 | 34   |
| 21                | DABCO                           | DMC                | -                                            | 48 | 1.0:2.0 | 34   |
| 22 <sup>c,d</sup> | DABCO                           | DMC                | -                                            | 4  | 1.5:1.0 | 23   |
| 23 <sup>e</sup>   | <b>A</b>                        | DCM                | --                                           | 72 | 1.5:1.0 | n.r. |
| 24 <sup>e</sup>   | <b>B</b>                        | DCM                | --                                           | 72 | 1.5:1.0 | n.r. |
| 25 <sup>e</sup>   | <b>A</b>                        | DCM                | Na <sub>2</sub> CO <sub>3</sub> (20 mol%)    | 72 | 1.5:1.0 | n.r. |
| 26 <sup>e</sup>   | <b>B</b>                        | DCM                | Na <sub>2</sub> CO <sub>3</sub> (20 mol%)    | 72 | 1.5:1.0 | n.r. |
| 27 <sup>e</sup>   | <b>A</b>                        | DCM                | Na <sub>2</sub> CO <sub>3</sub> (1.0 equiv.) | 72 | 1.5:1.0 | n.r. |
| 28 <sup>e</sup>   | <b>B</b>                        | DCM                | Na <sub>2</sub> CO <sub>3</sub> (1.0 equiv.) | 72 | 1.5:1.0 | n.r. |
| 29 <sup>e</sup>   | <b>A</b>                        | DCM                | K <sub>2</sub> CO <sub>3</sub> (1.0 equiv.)  | 72 | 1.5:1.0 | n.r. |
| 30 <sup>e</sup>   | <b>B</b>                        | DCM                | K <sub>2</sub> CO <sub>3</sub> (1.0 equiv.)  | 72 | 1.5:1.0 | n.r. |

<sup>a</sup> Unless otherwise specified the reaction conditions: **1a** (0.1 mmol), **2a** (0.1 mmol), base (1.0 equiv.), solvent (1.0 mL), 60 °C. <sup>b</sup> Yield of isolated **3aa** after purification by silica gel column chromatography. <sup>c</sup> DABCO (2 equiv.). <sup>d</sup> DMC (0.5 mL). <sup>e</sup> 40 °C.

### 3. General experimental procedures for synthesis of compounds **3**

A mixture of DABCO (0.20 mmol, 1.0 equiv.), EtONa (0.20 mmol, 1.0 equiv.), **1** (0.30 mmol, 1.5 equiv.) and **2** (0.20 mmol, 1.0 equiv.) and dimethyl carbonate (1.0 mL) were added to a sealed reaction tube equipped with a stir bar. The tube was then sealed and the resulting mixture was stirred at 90 °C for the 1-80 h. Upon completion (monitored by TLC, visualized by UV light), the reaction solution was concentrated in vacuo. The crude product was purified by column chromatography on silica gel (eluent PE:EtOAc = 10:1 to 5:1) to afford pure products **3**.

**8-oxo-1,3-diphenyl-1,2,3,3a,8,8a-hexahydrocyclopenta[a]indene-2-carbaldehyde (3aa)**

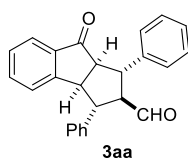

Yellow solid obtained by column chromatography (petroleum ether/ethyl acetate = 10:1 to 5:1), 55.6 mg, 79% yield, m.p. 135.4-136.6 °C. <sup>1</sup>H NMR (500 MHz, CDCl<sub>3</sub>, a mixture of two isomers, the ratio of the two isomers is 20:1) δ 9.37 (d, *J* = 2.7 Hz, 1H), 7.70 (d, *J* = 7.6 Hz, 1H), 7.43 (ddd, *J* = 10.4, 5.8, 2.0 Hz, 3H), 7.38 – 7.27 (m, 7H), 7.27 – 7.22 (m, 1H), 7.22 – 7.16 (m, 1H), 6.95 (d, *J* = 7.6 Hz, 1H), 4.09 (t, *J* = 9.0 Hz, 1H), 3.67 (td, *J* = 11.3, 2.8 Hz, 1H), 3.59 (dd, *J* = 11.1, 8.0 Hz, 1H), 3.45 (t, *J* = 8.3 Hz, 1H), 3.08 (dd, *J* = 11.6, 9.6 Hz, 1H) ppm. <sup>13</sup>C NMR (125 MHz, CDCl<sub>3</sub>) δ 205.0, 199.7, 153.9, 139.9, 138.3, 134.2, 134.1, 128.2, 127.9, 127.5, 126.9, 126.7, 126.6, 126.2, 124.5, 123.6, 68.0, 58.6, 53.8, 51.7, 46.8 ppm. HRMS (ESI) calcd. for C<sub>25</sub>H<sub>21</sub>O<sub>2</sub> [M + H]<sup>+</sup> 353.1536, found: 353.1533.

**5-fluoro-8-oxo-1,3-diphenyl-1,2,3,3a,8,8a-hexahydrocyclopenta[a]indene-2-carbaldehyde (3ba)**

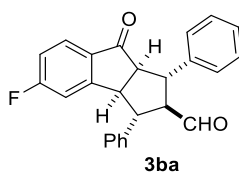

Light yellow solid obtained by column chromatography (petroleum ether/ethyl acetate = 10:1 to 5:1), 28.9 mg, 39% yield, m.p. 145.8-147.8 °C. <sup>1</sup>H NMR (500 MHz, CDCl<sub>3</sub>, a mixture of two isomers, the ratio of the two isomers is >20:1) δ 9.46 (d, *J* = 2.7 Hz, 1H), 7.79 (dd, *J* = 8.5, 5.3 Hz, 1H), 7.48 (d, *J* = 7.1 Hz, 2H), 7.45 – 7.33 (m, 7H), 7.31 – 7.26 (m, 1H), 7.12 (td, *J* = 8.6, 2.3 Hz, 1H), 6.68 (dd, *J* = 8.4, 2.3 Hz, 1H), 4.14 (t, *J* = 9.0 Hz, 1H), 3.75 (td, *J* = 11.4, 2.7 Hz, 1H), 3.66 (dd, *J* = 11.2, 8.2 Hz, 1H), 3.55 (t, *J* = 8.3 Hz, 1H), 3.17 (dd, *J* = 11.6, 9.6 Hz, 1H) ppm. <sup>13</sup>C NMR (125 MHz, CDCl<sub>3</sub>) δ

204.1, 200.6, 167.3 (d,  $J = 257.6$  Hz), 157.7 (d,  $J = 9.9$  Hz), 140.6, 138.9, 131.5 (d,  $J = 1.9$  Hz), 129.3, 129.0, 127.9, 127.8, 127.7, 127.4, 127.0 (d,  $J = 10.6$  Hz), 116.8 (d,  $J = 23.8$  Hz), 112.3 (d,  $J = 22.4$  Hz), 68.8, 59.8, 54.7, 52.3, 47.9 ppm. HRMS (ESI) calcd. for  $C_{25}H_{20}FO_2$   $[M + H]^+$  371.1442, found: 371.1431.

**1-(4-methoxyphenyl)-8-oxo-3-phenyl-1,2,3,3a,8,8a-hexahydrocyclopenta[a]indene-2-carbaldehyde (3ca)**

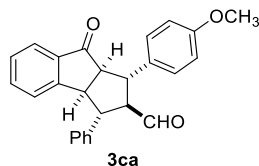

Vicious reddle liquid obtained by column chromatography (petroleum ether/ethyl acetate = 10:1 to 5:1), 58.9 mg, 77% yield.  $^1H$  NMR (400 MHz,  $CDCl_3$ , a mixture of two isomers, the ratio of the two isomers is 19:1)  $\delta$  9.44 (d,  $J = 2.9$  Hz, 1H), 7.78 (d,  $J = 7.6$  Hz, 1H), 7.51 (dt,  $J = 7.5, 1.3$  Hz, 1H), 7.46 – 7.32 (m, 8H), 7.05 (d,  $J = 7.6$  Hz, 1H), 6.92 (d,  $J = 8.6$  Hz, 2H), 4.16 (t,  $J = 8.9$  Hz, 1H), 3.80 (s, 3H), 3.71 (dt,  $J = 11.4, 2.9$  Hz, 1H), 3.60 (dd,  $J = 11.3, 8.2$  Hz, 1H), 3.48 (t,  $J = 8.3$  Hz, 1H), 3.18 (dd,  $J = 11.5, 9.5$  Hz, 1H).  $^{13}C$  NMR (100 MHz,  $CDCl_3$ )  $\delta$  205.0, 200.0, 157.7, 154.0, 138.5, 134.2, 134.1, 131.7, 128.1, 127.7, 127.4, 126.9, 126.6, 124.5, 123.5, 113.3, 68.1, 58.7, 54.2, 53.7, 51.5, 46.3 ppm. HRMS (ESI) calcd. for  $C_{26}H_{23}O_3$   $[M + H]^+$  383.1642, found: 383.1648.

**8-oxo-3-phenyl-1-(p-tolyl)-1,2,3,3a,8,8a-hexahydrocyclopenta[a]indene-2-carbaldehyde (3da)**

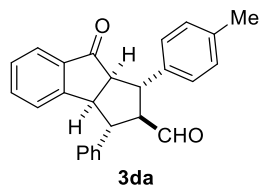

Vicious reddle liquid obtained by column chromatography (petroleum ether/ethyl acetate = 10:1 to 5:1), 46.9 mg, 64% yield.  $^1H$  NMR (400 MHz,  $CDCl_3$ , a mixture of two isomers, the ratio of the two isomers is 16:1)  $\delta$  9.45 (d,  $J = 2.8$  Hz, 1H), 7.78 (d,  $J = 7.6$  Hz, 1H), 7.52 (dt,  $J = 7.4, 1.3$  Hz, 1H), 7.45 – 7.28 (m, 8H), 7.23 – 7.17 (m, 2H), 7.05 (d,  $J = 7.6$  Hz, 1H), 4.17 (t,  $J = 9.0$  Hz, 1H), 3.79 – 3.69 (m, 1H), 3.66 – 3.59 (m,

1H), 3.51 (t,  $J = 8.3$  Hz, 1H), 3.19 (dd,  $J = 11.6, 9.5$  Hz, 1H), 2.36 (s, 3H) ppm.  $^{13}\text{C}$  NMR (100 MHz,  $\text{CDCl}_3$ )  $\delta$  205.0, 199.9, 154.0, 138.4, 136.7, 135.8, 134.2, 134.1, 128.6, 128.1, 127.4, 126.9, 126.6, 126.5, 124.5, 123.6, 68.1, 58.7, 53.7, 51.6, 46.6, 20.0 ppm. HRMS (ESI) calcd. for  $\text{C}_{26}\text{H}_{23}\text{O}_2$   $[\text{M} + \text{H}]^+$  367.1693, found: 367.1690.

**1-(4-fluorophenyl)-8-oxo-3-phenyl-1,2,3,3a,8,8a-hexahydrocyclopenta[a]indene-2-carbaldehyde (3ea)**

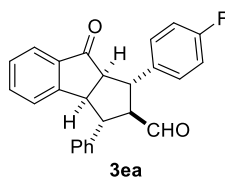

Tawny solid obtained by column chromatography (petroleum ether/ethyl acetate = 10:1 to 5:1), 37.8 mg, 51% yield, m.p. 152.7 – 154.5 °C.  $^1\text{H}$  NMR (400 MHz,  $\text{CDCl}_3$ , a mixture of two isomers, the ratio of the two isomers is >20:1)  $\delta$  9.44 (d,  $J = 2.6$  Hz, 1H), 7.78 (d,  $J = 7.6$  Hz, 1H), 7.52 (td,  $J = 7.5, 1.2$  Hz, 1H), 7.49 – 7.40 (m, 5H), 7.40 – 7.32 (m, 3H), 7.11 – 7.00 (m, 3H), 4.18 (t,  $J = 9.0$  Hz, 1H), 3.76 – 3.61 (m, 2H), 3.47 (t,  $J = 8.2$  Hz, 1H), 3.20 – 3.11 (m, 1H).  $^{13}\text{C}$  NMR (125 MHz,  $\text{DMSO}-d_6$ )  $\delta$  206.4, 203.2, 161.6 (d,  $J = 242.8$  Hz), 155.9, 140.4, 137.9 (d,  $J = 2.9$  Hz), 136.0, 135.5, 130.5 (d,  $J = 8.0$  Hz), 129.3, 128.9, 128.6, 127.8, 125.7, 124.4, 115.7 (d,  $J = 21.1$  Hz), 69.9, 59.5, 54.3, 52.5, 47.1 ppm. HRMS (ESI) calcd. for  $\text{C}_{25}\text{H}_{20}\text{FO}_2$   $[\text{M} + \text{H}]^+$  371.1442, found: 371.1440.

**1-(4-chlorophenyl)-8-oxo-3-phenyl-1,2,3,3a,8,8a-hexahydrocyclopenta[a]indene-2-carbaldehyde (3fa)**

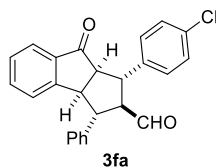

Tawny solid obtained by column chromatography (petroleum ether/ethyl acetate = 10:1 to 5:1), 29.4 mg, 38% yield, m.p. 161.6 - 162.9 °C.  $^1\text{H}$  NMR (400 MHz,  $\text{CDCl}_3$ , a mixture of two isomers, the ratio of the two isomers is >20:1)  $\delta$  9.44 (d,  $J = 2.6$  Hz, 1H), 7.78 (d,  $J = 7.6$  Hz, 1H), 7.55 – 7.49 (m, 1H), 7.43 (t,  $J = 7.7$  Hz, 5H), 7.39 – 7.32 (m,

5H), 7.05 – 7.01 (m, 1H), 4.17 (t,  $J = 9.0$  Hz, 1H), 3.76 – 3.59 (m, 2H), 3.46 (t,  $J = 8.1$  Hz, 1H), 3.15 (dd,  $J = 11.2, 9.5$  Hz, 1H) ppm.  $^{13}\text{C}$  NMR (125 MHz,  $\text{DMSO-}d_6$ )  $\delta$  206.33, 203.20, 155.91, 140.79, 140.41, 135.99, 135.46, 131.94, 130.51, 129.32, 128.92, 128.89, 128.66, 127.77, 125.74, 124.38, 69.66, 59.41, 54.24, 52.49, 47.10, ppm. HRMS (ESI) calcd. for  $\text{C}_{25}\text{H}_{20}\text{ClO}_2$   $[\text{M} + \text{H}]^+$  387.1146, found: 387.1147.

**1-(4-bromophenyl)-8-oxo-3-phenyl-1,2,3,3a,8,8a-hexahydrocyclopenta[a]indene-2-carbaldehyde (3ga)**

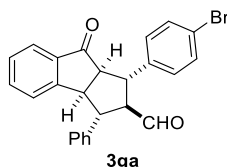

Tawny solid obtained by column chromatography (petroleum ether/ethyl acetate = 10:1 to 5:1), 26.7 mg, 31% yield, m.p. 164.0 – 166.2 °C.  $^1\text{H}$  NMR (400 MHz,  $\text{CDCl}_3$ , a mixture of two isomers, the ratio of the two isomers is >20:1)  $\delta$  9.43 (d,  $J = 2.6$  Hz, 1H), 7.78 (d,  $J = 7.6$  Hz, 1H), 7.55 – 7.48 (m, 3H), 7.46 – 7.32 (m, 8H), 7.03 (d,  $J = 7.6$  Hz, 1H), 4.17 (t,  $J = 9.0$  Hz, 1H), 3.73 – 3.56 (m, 2H), 3.46 (t,  $J = 8.2$  Hz, 1H), 3.15 (dd,  $J = 11.3, 9.5$  Hz, 1H) ppm.  $^{13}\text{C}$  NMR (100 MHz,  $\text{CDCl}_3$ )  $\delta$  204.8, 199.5, 153.8, 138.8, 138.0, 134.4, 134.0, 131.0, 128.5, 128.2, 127.6, 126.8, 124.5, 123.6, 120.1, 67.7, 58.4, 53.9, 51.5, 46.0 ppm. HRMS (ESI) calcd. for  $\text{C}_{25}\text{H}_{20}\text{BrO}_2$   $[\text{M} + \text{H}]^+$  431.0641, found: 431.0643.

**4-(2-formyl-8-oxo-3-phenyl-1,2,3,3a,8,8a-hexahydrocyclopenta[a]inden-1-yl)benzonitrile (3ha)**

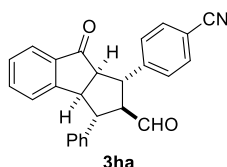

Light brown solid obtained by column chromatography (petroleum ether/ethyl acetate = 10:1 to 5:1), 18.9 mg, 25% yield, m.p. 188.8 – 190.4 °C.  $^1\text{H}$  NMR (400 MHz,  $\text{CDCl}_3$ )  $\delta$  9.43 (d,  $J = 2.1$  Hz, 1H), 7.78 (d,  $J = 7.6$  Hz, 1H), 7.69 – 7.60 (m, 4H), 7.56 – 7.50 (m, 1H), 7.47 – 7.41 (m, 3H), 7.37 (d,  $J = 7.2$  Hz, 3H), 7.02 (d,  $J = 7.6$  Hz, 1H), 4.19



(t,  $J = 9.1$  Hz, 1H), 3.78 – 3.68 (m, 2H), 3.51 – 3.44 (m, 1H), 3.13 (td,  $J = 9.4, 2.7$  Hz, 1H) ppm.  $^{13}\text{C}$  NMR (100 MHz,  $\text{CDCl}_3$ )  $\delta$  204.6, 199.0, 153.6, 145.5, 137.6, 134.6, 133.9, 131.7, 128.4, 127.8, 127.7, 127.0, 126.8, 124.6, 123.7, 117.7, 110.1, 67.2, 58.1, 54.2, 51.5, 46.0 ppm. HRMS (ESI) calcd. for  $\text{C}_{26}\text{H}_{19}\text{NO}_2$   $[\text{M} + \text{H}]^+$  378.1489, found: 378.1493.

**1-(3-methoxyphenyl)-8-oxo-3-phenyl-1,2,3,3a,8,8a-hexahydrocyclopenta[a]indene-2-carbaldehyde (3ia)**

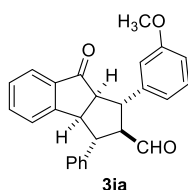

Vicious reddle liquid obtained by column chromatography (petroleum ether/ethyl acetate = 10:1 to 5:1), 32.1 mg, 42% yield.  $^1\text{H}$  NMR (400 MHz,  $\text{CDCl}_3$ , a mixture of two isomers, the ratio of the two isomers is 20:1)  $\delta$  9.38 (d,  $J = 2.7$  Hz, 1H), 7.70 (d,  $J = 7.5$  Hz, 1H), 7.43 (td,  $J = 7.7, 1.3$  Hz, 1H), 7.38 – 7.30 (m, 3H), 7.30 – 7.24 (m, 3H), 7.24 – 7.19 (m, 1H), 7.03 – 6.96 (m, 2H), 6.94 (d,  $J = 7.6$  Hz, 1H), 6.74 (dd,  $J = 8.2, 2.5$  Hz, 1H), 4.08 (t,  $J = 9.0$  Hz, 1H), 3.76 (s, 3H), 3.66 (td,  $J = 11.3, 2.8$  Hz, 1H), 3.60 – 3.51 (m, 1H), 3.44 (t,  $J = 8.2$  Hz, 1H), 3.07 (dd,  $J = 11.6, 9.6$  Hz, 1H) ppm.  $^{13}\text{C}$  NMR (100 MHz,  $\text{CDCl}_3$ )  $\delta$  205.1, 199.8, 159.0, 153.9, 141.5, 138.2, 134.2, 134.1, 128.9, 128.2, 127.5, 126.9, 126.7, 124.5, 123.6, 118.7, 112.7, 111.5, 67.8, 58.5, 54.2, 53.8, 51.6, 46.6 ppm. HRMS (ESI) calcd. for  $\text{C}_{26}\text{H}_{22}\text{O}_3$   $[\text{M} + \text{H}]^+$  383.1642, found: 383.1643.

**8-oxo-3-phenyl-1-(*m*-tolyl)-1,2,3,3a,8,8a-hexahydrocyclopenta[a]indene-2-carbaldehyde (3ja)**

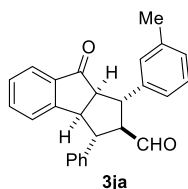

Yellow viscous liquid obtained by column chromatography (petroleum ether/ethyl acetate = 10:1 to 5:1), 49.1 mg, 67% yield.  $^1\text{H}$  NMR (500 MHz,  $\text{CDCl}_3$ , a mixture of two isomers, the ratio of the two isomers is 20:1)  $\delta$  9.45 (d,  $J = 2.9$  Hz, 1H), 7.78 (d,  $J$

= 7.5 Hz, 1H), 7.52 (td,  $J = 7.5, 1.3$  Hz, 1H), 7.46 – 7.39 (m, 3H), 7.40 – 7.31 (m, 3H), 7.29-7.27 (m, 3H), 7.14 – 7.07 (m, 1H), 7.04 (d,  $J = 7.7$  Hz, 1H), 4.18 (t,  $J = 9.0$  Hz, 1H), 3.74 (td,  $J = 11.4, 2.9$  Hz, 1H), 3.62 (dd,  $J = 11.1, 8.2$  Hz, 1H), 3.54 (t,  $J = 8.3$  Hz, 1H), 3.17 (dd,  $J = 11.7, 9.5$  Hz, 1H), 2.39 (s, 3H) ppm.  $^{13}\text{C}$  NMR (125 MHz,  $\text{CDCl}_3$ )  $\delta$  206.1, 200.9, 155.0, 140.8, 139.4, 138.6, 135.3, 135.2, 129.2, 128.9, 128.5, 128.4, 128.1, 127.9, 127.7, 125.6, 124.5, 124.6, 69.2, 59.7, 54.8, 52.7, 47.9, 21.6 ppm. HRMS (ESI) calcd. for  $\text{C}_{26}\text{H}_{23}\text{O}_2$   $[\text{M} + \text{H}]^+$  367.1693, found: 367.1690.

**1-(3-fluorophenyl)-8-oxo-3-phenyl-1,2,3,3a,8,8a-hexahydrocyclopenta[a]indene-2-carbaldehyde (3ka)**

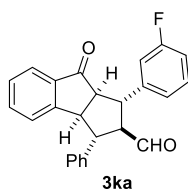

Brown solid obtained by column chromatography (petroleum ether/ethyl acetate = 10:1 to 5:1), 8.1 mg, 11% yield, m.p. 180.2-180.6 °C.  $^1\text{H}$  NMR (500 MHz,  $\text{DMSO}-d_6$ , a mixture of two isomers, the ratio of the two isomers is >20:1)  $\delta$  9.33 (d,  $J = 3.9$  Hz, 1H), 7.63 (d,  $J = 7.5$  Hz, 1H), 7.59 – 7.52 (m, 1H), 7.48 – 7.39 (m, 4H), 7.38 – 7.31 (m, 3H), 7.31 – 7.21 (m, 2H), 7.07 – 7.00 (m, 1H), 6.90 (d,  $J = 7.6$  Hz, 1H), 4.21 (t,  $J = 8.8$  Hz, 1H), 3.66 – 3.52 (m, 3H), 3.22 (t,  $J = 10.4$  Hz, 1H) ppm.  $^{13}\text{C}$  NMR (125 MHz,  $\text{DMSO}-d_6$ )  $\delta$  206.4, 203.2, 162.9 (d,  $J = 243.1$  Hz), 155.9, 144.8 (d,  $J = 7.4$  Hz), 140.3, 136.0, 135.5, 130.8 (d,  $J = 8.5$  Hz), 129.3, 128.9, 128.7, 127.8, 125.7, 124.9, 124.8 (d,  $J = 2.7$  Hz), 115.2 (d,  $J = 21.6$  Hz), 114.2 (d,  $J = 20.7$  Hz), 69.5, 59.4, 54.3, 52.5, 47.3 ppm. HRMS (ESI) calcd. for  $\text{C}_{25}\text{H}_{20}\text{FO}_2$   $[\text{M} + \text{H}]^+$  371.1442, found: 371.1446.

**1-(3-chlorophenyl)-8-oxo-3-phenyl-1,2,3,3a,8,8a-hexahydrocyclopenta[a]indene-2-carbaldehyde (3la)**

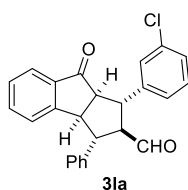

Brown solid obtained by column chromatography (petroleum ether/ethyl acetate = 10:1

to 5:1), 10.8 mg, 14% yield, m.p. 144.0 – 145.8 °C. <sup>1</sup>H NMR (400 MHz, CDCl<sub>3</sub>) δ 9.46 (d, *J* = 2.5 Hz, 1H), 7.79 (d, *J* = 7.6 Hz, 1H), 7.56 – 7.49 (m, 2H), 7.44 (t, *J* = 7.7 Hz, 3H), 7.41 – 7.29 (m, 5H), 7.29 – 7.27 (m, 1H), 7.03 (d, *J* = 7.7 Hz, 1H), 4.19 (t, *J* = 9.0 Hz, 1H), 3.77 – 3.56 (m, 2H), 3.50 (t, *J* = 8.1 Hz, 1H), 3.14 (dd, *J* = 11.3, 9.6 Hz, 1H) ppm. <sup>13</sup>C NMR (100 MHz, CDCl<sub>3</sub>) δ 204.8, 199.3, 153.7, 142.0, 138.0, 134.4, 134.0, 133.8, 129.2, 128.2, 127.6, 126.8, 126.7, 126.5, 125.2, 124.6, 123.6, 67.7, 58.4, 54.0, 51.6, 46.1. HRMS (ESI) calcd. for C<sub>25</sub>H<sub>20</sub>ClO<sub>2</sub> [M + H]<sup>+</sup> 387.1146, found: 387.1142.

**1-(3-bromophenyl)-8-oxo-3-phenyl-1,2,3,3a,8,8a-hexahydrocyclopenta[a]indene-2-carbaldehyde (3ma)**

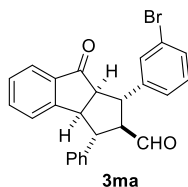

Tawny solid obtained by column chromatography (petroleum ether/ethyl acetate = 10:1 to 5:1), 12.1 mg, 14% yield, m.p. 159.33 – 161.2 °C. <sup>1</sup>H NMR (400 MHz, CDCl<sub>3</sub>) δ 9.47 (d, *J* = 2.5 Hz, 1H), 7.81 (d, *J* = 7.6 Hz, 1H), 7.68 (s, 1H), 7.55 (t, *J* = 7.3 Hz, 1H), 7.49 – 7.42 (m, 5H), 7.42 – 7.35 (m, 3H), 7.29 (t, *J* = 3.9 Hz, 1H), 7.05 (d, *J* = 7.6 Hz, 1H), 4.21 (t, *J* = 9.1 Hz, 1H), 3.80 – 3.63 (m, 2H), 3.52 (t, *J* = 8.2 Hz, 1H), 3.15 (dd, *J* = 11.3, 9.6 Hz, 1H) ppm. <sup>13</sup>C NMR (100 MHz, CDCl<sub>3</sub>) δ 204.7, 199.3, 153.7, 142.3, 137.9, 134.4, 134.0, 129.6, 129.5, 129.4, 128.2, 127.6, 126.9, 125.8, 124.6, 123.7, 122.0, 67.7, 58.4, 54.0, 51.5, 46.1. HRMS (ESI) calcd. for C<sub>25</sub>H<sub>20</sub>BrO<sub>2</sub> [M + H]<sup>+</sup> 431.0641, found: 466.0639.

**1-(2-methoxyphenyl)-8-oxo-3-phenyl-1,2,3,3a,8,8a-hexahydrocyclopenta[a]indene-2-carbaldehyde (3na)**

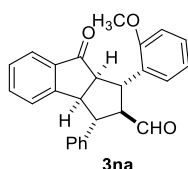

Brown viscous liquid obtained by column chromatography (petroleum ether/ethyl acetate = 10:1 to 5:1), 43.6 mg, 57% yield. <sup>1</sup>H NMR (400 MHz, CDCl<sub>3</sub>, a mixture of

two isomers, the ratio of the two isomers is 12:1)  $\delta$  9.42 (d,  $J = 2.8$  Hz, 1H), 7.76 (d,  $J = 7.6$  Hz, 1H), 7.50 (td,  $J = 7.5, 1.3$  Hz, 1H), 7.44 – 7.38 (m, 4H), 7.38 – 7.27 (m, 4H), 7.04 (d,  $J = 7.6$  Hz, 1H), 6.98 (td,  $J = 7.5, 1.1$  Hz, 1H), 6.94 (d,  $J = 8.2$  Hz, 1H), 4.26 – 4.17 (m, 1H), 3.94 (s, 3H), 3.89 (dd,  $J = 11.5, 2.6$  Hz, 1H), 3.86 – 3.76 (m, 2H), 3.14 (dd,  $J = 11.6, 9.5$  Hz, 1H) ppm.  $^{13}\text{C}$  NMR (100 MHz,  $\text{CDCl}_3$ )  $\delta$  205.8, 200.1, 156.1, 154.4, 139.1, 134.2, 134.0, 129.0, 128.0, 127.6, 127.4, 127.3, 126.9, 126.4, 124.5, 123.4, 120.1, 110.1, 67.1, 56.7, 54.3, 53.8, 52.1, 44.1 ppm. HRMS (ESI) calcd. for  $\text{C}_{26}\text{H}_{23}\text{O}_3$   $[\text{M} + \text{H}]^+$  383.1642, found: 383.1645.

**8-oxo-3-phenyl-1-(*o*-tolyl)-1,2,3,3a,8,8a-hexahydrocyclopenta[*a*]indene-2-carbaldehyde (3oa)**

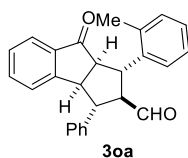

Brown viscous liquid obtained by column chromatography (petroleum ether/ethyl acetate = 10:1 to 5:1), 42.5 mg, 58% yield.  $^1\text{H}$  NMR (400 MHz,  $\text{CDCl}_3$ )  $\delta$  9.41 (d,  $J = 2.2$  Hz, 1H), 7.77 (d,  $J = 7.6$  Hz, 1H), 7.55 – 7.48 (m, 2H), 7.47 – 7.38 (m, 5H), 7.38 – 7.32 (m, 1H), 7.32 – 7.24 (m, 1H), 7.22 – 7.11 (m, 2H), 7.05 (d,  $J = 7.6$  Hz, 1H), 4.24 (t,  $J = 9.0$  Hz, 1H), 3.97 (dd,  $J = 11.1, 8.1$  Hz, 1H), 3.81 - 3.75 (m, 1H), 3.53 (t,  $J = 8.3$  Hz, 1H), 3.17 (dd,  $J = 11.8, 9.6$  Hz, 1H), 2.49 (s, 3H) ppm.  $^{13}\text{C}$  NMR (100 MHz,  $\text{CDCl}_3$ )  $\delta$  205.1, 199.7, 154.0, 138.8, 138.5, 135.6, 134.2, 134.0, 129.8, 128.2, 127.4, 126.8, 126.6, 125.8, 125.7, 125.6, 124.5, 123.5, 70.1, 59.9, 54.0, 51.8, 42.2, 19.1 ppm. HRMS (ESI) calcd. for  $\text{C}_{26}\text{H}_{23}\text{O}_2$   $[\text{M} + \text{H}]^+$  367.1693, found: 367.1698.

**1-(2-fluorophenyl)-8-oxo-3-phenyl-1,2,3,3a,8,8a-hexahydrocyclopenta[*a*]indene-2-carbaldehyde (3pa)**

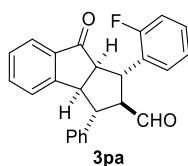

Reddish brown viscous liquid obtained by column chromatography (petroleum ether/ethyl acetate = 10:1 to 5:1), 20.0 mg, 27% yield.  $^1\text{H}$  NMR (400 MHz,  $\text{CDCl}_3$ )  $\delta$

9.44 (d,  $J = 2.4$  Hz, 1H), 7.77 (d,  $J = 7.6$  Hz, 1H), 7.51 (t,  $J = 7.2$  Hz, 1H), 7.47 – 7.37 (m, 6H), 7.34 (d,  $J = 7.0$  Hz, 1H), 7.28 (d,  $J = 7.3$  Hz, 1H), 7.19 – 7.08 (m, 2H), 7.04 (d,  $J = 7.5$  Hz, 1H), 4.25 (t,  $J = 8.6$  Hz, 1H), 3.86 (t,  $J = 10.2$  Hz, 1H), 3.71 (p,  $J = 8.0$  Hz, 2H), 3.11 (t, 1H) ppm.  $^{13}\text{C}$  NMR (100 MHz,  $\text{CDCl}_3$ )  $\delta$  205.0, 199.5, 160.2 (d,  $J = 245.7$  Hz), 154.0, 138.4, 134.2, 134.0, 129.8 (d,  $J = 4.8$  Hz), 128.2, 128.1, 127.5, 126.9, 126.7, 124.5, 123.7 (d,  $J = 3.3$  Hz), 123.6, 115.2 (d,  $J = 21.9$  Hz), 67.3, 57.2, 54.2, 51.7, 42.9 ppm. HRMS (ESI) calcd. for  $\text{C}_{25}\text{H}_{20}\text{FO}_2$  [ $\text{M} + \text{H}$ ] $^+$  371.1442, found: 371.1446.

**1-(2-chlorophenyl)-8-oxo-3-phenyl-1,2,3,3a,8,8a-hexahydrocyclopenta[a]indene-2-carbaldehyde (3qa)**

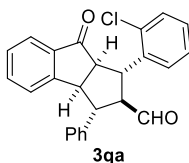

Yellow viscous liquid obtained by column chromatography (petroleum ether/ethyl acetate = 10:1 to 5:1), 43.3 mg, 56% yield.  $^1\text{H}$  NMR (400 MHz,  $\text{CDCl}_3$ )  $\delta$  9.35 (d,  $J = 2.5$  Hz, 1H), 7.68 (d,  $J = 7.6$  Hz, 1H), 7.42 (t,  $J = 7.9$  Hz, 2H), 7.36 – 7.27 (m, 6H), 7.27 – 7.18 (m, 2H), 7.18 – 7.11 (m, 1H), 6.94 (d,  $J = 7.6$  Hz, 1H), 4.20 (t,  $J = 9.1$  Hz, 1H), 3.96 (dd,  $J = 11.1, 7.8$  Hz, 1H), 3.91 – 3.81 (m, 1H), 3.70 (t,  $J = 8.1$  Hz, 1H), 3.06 (t,  $J = 10.6$  Hz, 1H) ppm.  $^{13}\text{C}$  NMR (125 MHz,  $\text{DMSO-}d_6$ )  $\delta$  205.9, 202.5, 156.0, 140.4, 138.8, 136.0, 135.3, 133.4, 130.7, 129.9, 129.3, 129.1, 128.9, 128.6, 128.3, 127.8, 125.8, 124.4, 71.1, 59.4, 54.1, 52.4, 44.4 ppm. HRMS (ESI) calcd. for  $\text{C}_{25}\text{H}_{20}\text{ClO}_2$  [ $\text{M} + \text{H}$ ] $^+$  387.1146, found: 387.1145.

**1-(2-bromophenyl)-8-oxo-3-phenyl-1,2,3,3a,8,8a-hexahydrocyclopenta[a]indene-2-carbaldehyde (3r)**

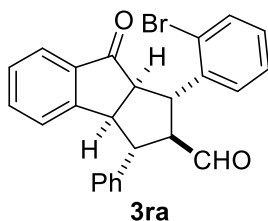

Brown viscous liquid obtained by column chromatography (petroleum ether/ethyl acetate = 10:1 to 5:1), 44.9 mg, 52% yield.  $^1\text{H}$  NMR (500 MHz,  $\text{DMSO-}d_6$ )  $\delta$  9.46 (d,

$J = 4.3$  Hz, 1H), 7.92 (d,  $J = 7.7$  Hz, 1H), 7.69 (d,  $J = 7.6$  Hz, 1H), 7.68 – 7.58 (m, 2H), 7.55 – 7.44 (m, 4H), 7.42 (t,  $J = 7.6$  Hz, 2H), 7.32 (t,  $J = 7.4$  Hz, 1H), 7.23 (td,  $J = 7.7$ , 1.6 Hz, 1H), 7.00 (d,  $J = 7.6$  Hz, 1H), 4.36 (t,  $J = 8.8$  Hz, 1H), 4.09 (dd,  $J = 10.9$ , 8.7 Hz, 1H), 3.76 (t,  $J = 8.5$  Hz, 1H), 3.54 (td,  $J = 11.2$ , 4.3 Hz, 1H), 3.50 – 3.43 (m, 1H) ppm.  $^{13}\text{C}$  NMR (125 MHz, DMSO- $d_6$ )  $\delta$  205.72, 202.35, 155.98, 140.45, 140.38, 136.03, 135.22, 133.16, 130.85, 129.43, 129.32, 128.94, 128.90, 128.62, 127.78, 125.76, 124.41, 124.37, 71.51, 59.77, 54.08, 52.39, 47.08 ppm. HRMS (ESI) calcd. for  $\text{C}_{25}\text{H}_{20}\text{BrO}_2$   $[\text{M} + \text{H}]^+$  431.0641, found: 431.0646.

**8-oxo-1-phenyl-3-(p-tolyl)-1,2,3,3a,8,8a-hexahydrocyclopenta[a]indene-2-carbaldehyde (3ab)**

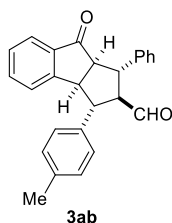

Brown viscous liquid obtained by column chromatography (petroleum ether/ethyl acetate = 10:1 to 5:1), 21.2 mg, 29% yield.  $^1\text{H}$  NMR (400 MHz,  $\text{CDCl}_3$ )  $\delta$  9.42 (s, 1H), 7.75 (d,  $J = 7.7$  Hz, 1H), 7.47 (dd,  $J = 11.8$ , 7.3 Hz, 3H), 7.37 (dt,  $J = 15.2$ , 7.4 Hz, 3H), 7.27-7.14 (m, 5H), 7.02 (d,  $J = 7.6$  Hz, 1H), 4.12 (t,  $J = 9.1$  Hz, 1H), 3.71-3.61 (m, 2H), 3.49 (t,  $J = 8.0$  Hz, 1H), 3.09 (t,  $J = 10.2$  Hz, 1H), 2.35 (s, 3H) ppm.  $^{13}\text{C}$  NMR (100 MHz,  $\text{CDCl}_3$ )  $\delta$  205.1, 199.9, 154.0, 139.9, 136.4, 135.2, 134.2, 134.1, 128.8, 127.9, 127.4, 126.7, 126.7, 126.2, 124.6, 123.6, 68.0, 58.6, 53.6, 51.7, 46.7, 20.1 ppm. HRMS (ESI) calcd. for  $\text{C}_{26}\text{H}_{23}\text{O}_2$   $[\text{M} + \text{H}]^+$  367.1693, found: 367.1695.

**3-(4-fluorophenyl)-8-oxo-1-phenyl-1,2,3,3a,8,8a-hexahydrocyclopenta[a]indene-2-carbaldehyde (3ac)**

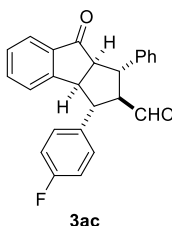

Light yellow solid obtained by column chromatography (petroleum ether/ethyl acetate = 10:1 to 5:1), 34.1 mg, 46% yield, m.p. 145.8-147.8 °C. <sup>1</sup>H NMR (400 MHz, CDCl<sub>3</sub>, a mixture of two isomers, the ratio of the two isomers is >20:1) δ 9.45 (d, *J* = 2.5 Hz, 1H), 7.79 (d, *J* = 7.6 Hz, 1H), 7.57 – 7.47 (m, 3H), 7.41 (dt, *J* = 18.9, 7.6 Hz, 3H), 7.36 – 7.31 (m, 2H), 7.29 (t, *J* = 7.3 Hz, 1H), 7.11 (t, *J* = 8.6 Hz, 2H), 7.01 (d, *J* = 7.6 Hz, 1H), 4.12 (t, *J* = 9.1 Hz, 1H), 3.79 – 3.61 (m, 2H), 3.53 (t, *J* = 8.1 Hz, 1H), 3.16 (t, *J* = 10.2 Hz, 1H) ppm. <sup>13</sup>C NMR (125 MHz, DMSO-*d*<sub>6</sub>) δ 206.4, 203.2, 161.9 (d, *J* = 243.1 Hz), 155.7, 141.8, 136.6 (d, *J* = 3.1 Hz), 135.9, 135.5, 130.60 (d, *J* = 8.0 Hz), 129.0, 128.9, 128.5, 127.3, 125.7, 124.4, 116.03 (d, *J* = 21.1 Hz), 69.9, 59.5, 53.5, 52.6, 47.8 ppm. HRMS (ESI) calcd. for C<sub>25</sub>H<sub>20</sub>FO<sub>2</sub> [M + H]<sup>+</sup> 371.1442, found: 371.1445.

**3-(4-chlorophenyl)-8-oxo-1-phenyl-1,2,3,3a,8,8a-hexahydrocyclopenta[a]indene-2-carbaldehyde (3ad)**

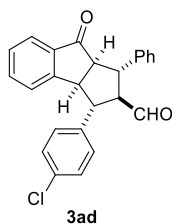

Brown solid obtained by column chromatography (petroleum ether/ethyl acetate = 10:1 to 5:1), 63.4 mg, 82% yield, m.p. 145.8-147.8 °C. <sup>1</sup>H NMR (400 MHz, CDCl<sub>3</sub>, a mixture of two isomers, the ratio of the two isomers is >20:1) δ 9.37 (d, *J* = 2.5 Hz, 1H), 7.70 (d, *J* = 7.6 Hz, 1H), 7.42 (dd, *J* = 12.3, 7.0 Hz, 3H), 7.37 (d, *J* = 7.4 Hz, 1H), 7.35 – 7.28 (m, 4H), 7.25 – 7.17 (m, 3H), 6.94 (d, *J* = 7.6 Hz, 1H), 4.04 (t, *J* = 9.1 Hz, 1H), 3.70 – 3.52 (m, 2H), 3.45 (t, *J* = 8.0 Hz, 1H), 3.07 (t, *J* = 10.3 Hz, 1H) ppm. <sup>13</sup>C NMR (125 MHz, DMSO-*d*<sub>6</sub>) δ 206.4, 203.1, 155.64, 141.7, 139.5, 136.0, 135.5, 132.3, 130.6, 129.2, 129.0, 128.9, 128.5, 127.3, 125.8, 124.4, 69.8, 59.5, 53.5, 52.5, 47.8 ppm. HRMS (ESI) calcd. for C<sub>25</sub>H<sub>20</sub>ClO<sub>2</sub> [M + H]<sup>+</sup> 387.1146, found: 387.1150.

**3-(4-bromophenyl)-8-oxo-1-phenyl-1,2,3,3a,8,8a-hexahydrocyclopenta[a]indene-2-carbaldehyde (3ae)**

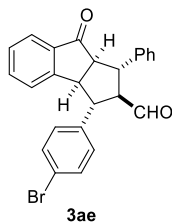

Brown solid obtained by column chromatography (petroleum ether/ethyl acetate = 10:1 to 5:1), 38.8 mg, 45% yield, m.p. 135.1-136.9 °C. <sup>1</sup>H NMR (400 MHz, CDCl<sub>3</sub>, a mixture of two isomers, the ratio of the two isomers is >20:1) δ 9.43 (d, *J* = 2.6 Hz, 1H), 7.78 (d, *J* = 7.6 Hz, 1H), 7.57 – 7.47 (m, 3H), 7.44 – 7.41 (m, 3H), 7.39 – 7.35 (m, 5H), 7.03 (d, *J* = 7.6 Hz, 1H), 4.17 (t, *J* = 9.0 Hz, 1H), 3.75 – 3.58 (m, 2H), 3.46 (t, *J* = 8.2 Hz, 1H), 3.15 (dd, *J* = 11.3, 9.5 Hz, 1H) ppm. <sup>13</sup>C NMR (100 MHz, CDCl<sub>3</sub>) δ 204.8, 199.5, 153.8, 138.8, 138.0, 134.4, 134.0, 131.0, 128.5, 128.2, 127.6, 126.8, 126.8, 124.5, 123.6, 120.2, 67.7, 58.4, 53.9, 51.5, 46.0 ppm. HRMS (ESI) calcd. for C<sub>25</sub>H<sub>20</sub>BrO<sub>2</sub> [M + H]<sup>+</sup> 431.0641, found: 431.0640.

**3-(4-nitrophenyl)-8-oxo-1-phenyl-1,2,3,3a,8,8a-hexahydrocyclopenta[a]indene-2-carbaldehyde (3af)**

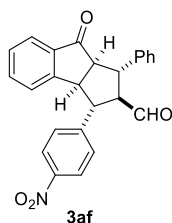

Brown solid obtained by column chromatography (petroleum ether/ethyl acetate = 10:1 to 5:1), 20.7 mg, 26% yield, m.p. 201.3-202.7 °C. <sup>1</sup>H NMR (400 MHz, CDCl<sub>3</sub>) δ 9.47 (d, *J* = 2.4 Hz, 1H), 8.29 (d, *J* = 8.6 Hz, 2H), 7.80 (d, *J* = 7.6 Hz, 1H), 7.63 – 7.54 (m, 3H), 7.53 – 7.47 (m, 3H), 7.45 – 7.38 (m, 2H), 7.34 – 7.28 (m, 1H), 6.97 (d, *J* = 7.5 Hz, 1H), 4.18 (t, *J* = 8.9 Hz, 1H), 3.77 (dt, *J* = 11.3, 2.4 Hz, 1H), 3.71 – 3.55 (m, 2H), 3.32 (dd, *J* = 11.6, 9.6 Hz, 1H) ppm. <sup>13</sup>C NMR (100 MHz, CDCl<sub>3</sub>) δ 205.2, 199.9, 153.9, 147.5, 147.3, 140.2, 135.5, 135.1, 129.2, 129.0, 128.9, 127.6, 125.2, 124.9, 124.4, 68.8, 59.6, 53.9, 52.5, 48.3 ppm. HRMS (ESI) calcd. for C<sub>25</sub>H<sub>20</sub>NO<sub>4</sub> [M + H]<sup>+</sup> 398.1387, found: 398.1386.



**8-oxo-1-phenyl-3-(m-tolyl)-1,2,3,3a,8,8a-hexahydrocyclopenta[a]indene-2-carbaldehyde (3ag)**

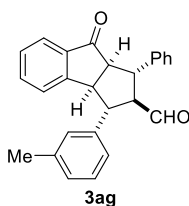

Yellow viscous liquid obtained by column chromatography (petroleum ether/ethyl acetate = 10:1 to 5:1), 13.2 mg, 18% yield. <sup>1</sup>H NMR (400 MHz, CDCl<sub>3</sub>, a mixture of two isomers, the ratio of the two isomers is >20:1) δ 9.37 (d, *J* = 2.7 Hz, 1H), 7.70 (d, *J* = 7.6 Hz, 1H), 7.48 – 7.40 (m, 3H), 7.33 (dt, *J* = 15.3, 7.6 Hz, 3H), 7.24 – 7.18 (m, 2H), 7.10 – 7.06 (m, 3H), 6.98 (d, *J* = 7.6 Hz, 1H), 4.10 (t, *J* = 9.0 Hz, 1H), 3.71 – 3.55 (m, 2H), 3.45 (t, *J* = 8.2 Hz, 1H), 3.05 (t, 1H), 2.32 (s, 3H) ppm. <sup>13</sup>C NMR (100 MHz, CDCl<sub>3</sub>) δ 205.0, 199.9, 154.0, 139.8, 138.2, 137.8, 134.2, 134.1, 128.0, 127.9, 127.5, 127.4, 126.7, 126.2, 124.6, 124.0, 123.5, 68.0, 58.6, 53.8, 51.6, 46.7, 20.5 ppm. HRMS (ESI) calcd. for C<sub>26</sub>H<sub>23</sub>O<sub>2</sub> [M + H]<sup>+</sup> 367.1693, found: 367.1697.

**3-(3-chlorophenyl)-8-oxo-1-phenyl-1,2,3,3a,8,8a-hexahydrocyclopenta[a]indene-2-carbaldehyde (3ah)**

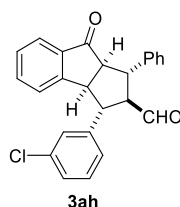

Brown viscous liquid obtained by column chromatography (petroleum ether/ethyl acetate = 10:1 to 5:1), 24.8 mg, 32% yield. <sup>1</sup>H NMR (400 MHz, CDCl<sub>3</sub>, a mixture of two isomers, the ratio of the two isomers is 13:1) δ 9.38 (d, *J* = 1.8 Hz, 1H), 7.71 (d, *J* = 7.5 Hz, 1H), 7.46 (t, *J* = 7.3 Hz, 1H), 7.41 (d, *J* = 7.5 Hz, 2H), 7.37 (d, *J* = 7.5 Hz, 1H), 7.31 (t, *J* = 7.5 Hz, 3H), 7.28 – 7.20 (m, 3H), 7.19 – 7.15 (m, 1H), 6.96 (d, *J* = 7.5 Hz, 1H), 4.07 (t, *J* = 8.9 Hz, 1H), 3.64 (t, *J* = 11.9 Hz, 1H), 3.59 – 3.51 (m, 1H), 3.46 (t, *J* = 8.2 Hz, 1H), 3.08 (t, *J* = 10.5 Hz, 1H) ppm. <sup>13</sup>C NMR (100 MHz, CDCl<sub>3</sub>) δ 204.6, 199.4, 153.5, 140.6, 139.5, 134.4, 134.1, 134.0, 129.4, 128.0, 127.6, 126.9, 126.8,

126.6, 126.4, 125.3, 124.4, 123.7, 67.9, 58.5, 53.1, 51.5, 47.0 ppm. HRMS (ESI) calcd. for  $C_{25}H_{20}ClO_2$   $[M + H]^+$  387.1146, found: 387.1148.

**3-(3-nitrophenyl)-8-oxo-1-phenyl-1,2,3,3a,8,8a-hexahydrocyclopenta[a]indene-2-carbaldehyde (3ai)**

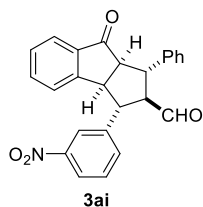

Orange-yellow solid obtained by column chromatography (petroleum ether/ethyl acetate = 10:1 to 5:1), 37.4 mg, 47% yield, m.p. 139.1-141.0 °C.  $^1H$  NMR (400 MHz,  $CDCl_3$ , a mixture of two isomers, the ratio of the two isomers is 17:1)  $\delta$  9.47 (d,  $J = 2.4$  Hz, 1H), 8.31 (t,  $J = 2.0$  Hz, 1H), 8.24 – 8.16 (m, 1H), 7.80 (d,  $J = 7.6$  Hz, 1H), 7.69 (d,  $J = 7.7$  Hz, 1H), 7.60 (t,  $J = 7.9$  Hz, 1H), 7.57 – 7.49 (m, 3H), 7.47 (d,  $J = 7.4$  Hz, 1H), 7.45 – 7.38 (m, 2H), 7.35 – 7.28 (m, 1H), 6.98 (d,  $J = 7.6$  Hz, 1H), 4.22 – 4.15 (m, 1H), 3.78 (td,  $J = 11.3, 2.4$  Hz, 1H), 3.71 – 3.53 (m, 2H), 3.34 (dd,  $J = 11.6, 9.6$  Hz, 1H) ppm.  $^{13}C$  NMR (100 MHz,  $CDCl_3$ )  $\delta$  205.3, 200.1, 154.1, 148.9, 142.0, 140.2, 135.6, 135.1, 134.6, 130.2, 129.2, 128.9, 127.7, 127.6, 125.2, 124.9, 122.8, 122.5, 68.8, 59.5, 53.7, 52.4, 48.4 ppm. HRMS (ESI) calcd. for  $C_{25}H_{20}NO_4$   $[M + H]^+$  398.1387, found: 398.1392.

**8-oxo-1-phenyl-3-(o-tolyl)-1,2,3,3a,8,8a-hexahydrocyclopenta[a]indene-2-carbaldehyde (3aj)**

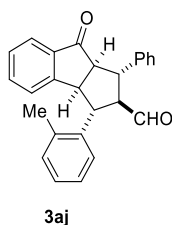

Orange-yellow solid obtained by column chromatography (petroleum ether/ethyl acetate = 10:1 to 5:1), 18.3 mg, 25% yield, m.p. 145.6-147.5 °C.  $^1H$  NMR (400 MHz,  $CDCl_3$ )  $\delta$  9.39 (s, 1H), 7.71 (d,  $J = 7.5$  Hz, 1H), 7.53 (d,  $J = 7.7$  Hz, 1H), 7.43 (t,  $J =$

7.1 Hz, 3H), 7.32 (td,  $J = 14.6, 12.4, 8.0$  Hz, 4H), 7.22 (d,  $J = 7.3$  Hz, 1H), 7.13 (d,  $J = 8.0$  Hz, 2H), 6.91 (d,  $J = 7.5$  Hz, 1H), 4.11 (t,  $J = 9.0$  Hz, 1H), 3.71 (td,  $J = 11.2, 2.1$  Hz, 1H), 3.64 (d,  $J = 7.9$  Hz, 1H), 3.53 – 3.36 (m, 2H), 2.03 (s, 3H) ppm.  $^{13}\text{C}$  NMR (100 MHz,  $\text{CDCl}_3$ )  $\delta$  205.2, 199.7, 154.0, 140.0, 136.9, 135.3, 134.3, 134.0, 129.8, 128.0, 127.5, 126.7, 126.2, 126.12, 126.0, 125.6, 124.2, 123.6, 69.0, 58.8, 52.5, 48.6, 47.0, 19.1 ppm. HRMS (ESI) calcd. for  $\text{C}_{26}\text{H}_{23}\text{O}_2$   $[\text{M} + \text{H}]^+$  367.1693, found: 367.1697.

**3-(2-chlorophenyl)-8-oxo-1-phenyl-1,2,3,3a,8,8a-hexahydrocyclopenta[a]indene-2-carbaldehyde (3ak)**

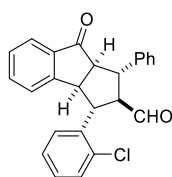

**3ak**

Brown viscous liquid obtained by column chromatography (petroleum ether/ethyl acetate = 10:1 to 5:1), 19.3 mg, 25% yield.  $^1\text{H}$  NMR (400 MHz,  $\text{CDCl}_3$ , a mixture of two isomers, the ratio of the two isomers is 13:1)  $\delta$  9.49 (d,  $J = 3.1$  Hz, 1H), 7.72 (d,  $J = 7.6$  Hz, 1H), 7.58 – 7.49 (m, 2H), 7.47 (d,  $J = 7.5$  Hz, 1H), 7.41 – 7.35 (m, 2H), 7.34 – 7.27 (m, 3H), 7.23 – 7.19 (m, 1H), 7.17 – 7.14 (m, 1H), 6.83 (d,  $J = 15.7$  Hz, 1H), 6.35 – 6.19 (m, 1H), 3.90 (t,  $J = 8.8$  Hz, 1H), 3.58 (dd,  $J = 11.1, 8.3$  Hz, 1H), 3.40–3.33 (m, 2H), 2.89 – 2.70 (m, 1H) ppm.  $^{13}\text{C}$  NMR (100 MHz,  $\text{CDCl}_3$ )  $\delta$  204.9, 199.7, 153.7, 139.7, 134.5, 133.7, 132.1, 130.4, 128.8, 128.5, 128.0, 127.9, 127.6, 126.6, 126.3, 126.0, 124.6, 123.6, 66.6, 58.6, 51.6, 49.3, 46.5 ppm. HRMS (ESI) calcd. for  $\text{C}_{25}\text{H}_{20}\text{ClO}_2$   $[\text{M} + \text{H}]^+$  387.1146, found: 387.1150.

**3-(2-bromophenyl)-8-oxo-1-phenyl-1,2,3,3a,8,8a-hexahydrocyclopenta[a]indene-2-carbaldehyde (3al)**

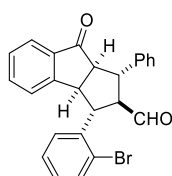

**3al**

Brown viscous liquid obtained by column chromatography (petroleum ether/ethyl acetate = 10:1 to 5:1), 14.7 mg, 17% yield. <sup>1</sup>H NMR (400 MHz, CDCl<sub>3</sub>, a mixture of two isomers, the ratio of the two isomers is 10:1) δ 9.49 (d, *J* = 3.2 Hz, 1H), 7.72 (d, *J* = 7.6 Hz, 1H), 7.58 – 7.53 (m, 1H), 7.52 – 7.48 (m, 2H), 7.38 (d, *J* = 7.0 Hz, 2H), 7.30 (t, *J* = 7.6 Hz, 2H), 7.27 – 7.20 (m, 2H), 7.10 – 7.05 (m, 1H), 6.79 (d, *J* = 15.7 Hz, 1H), 6.23 (dd, *J* = 15.7, 8.6 Hz, 1H), 3.90 (t, *J* = 8.8 Hz, 1H), 3.58 (dd, *J* = 11.0, 8.3 Hz, 1H), 3.43 – 3.31 (m, 2H), 2.84 (q, *J* = 9.3 Hz, 1H) ppm. <sup>13</sup>C NMR (100 MHz, CDCl<sub>3</sub>) δ 204.9, 199.7, 153.7, 139.7, 135.6, 134.5, 132.0, 131.1, 130.6, 128.2, 128.0, 127.6, 126.7, 126.6, 126.3, 124.7, 123.6, 122.5, 66.6, 58.6, 51.5, 49.3, 46.5 ppm. HRMS (ESI) calcd. for C<sub>25</sub>H<sub>20</sub>BrO<sub>2</sub> [M + H]<sup>+</sup> 431.0641, found: 431.0645.

#### 4. General experimental procedures for synthesis of compounds 5

A mixture of DABCO (0.20 mmol, 1.0 equiv.), EtONa (0.20 mmol, 1.0 equiv.), **1** (0.30 mmol, 1.5 equiv.) and **4** (0.20 mmol, 1.0 equiv.) and dimethyl carbonate (1.0 mL) were added to a sealed reaction tube equipped with a stir bar. The tube was then sealed and the resulting mixture was stirred at 90 °C for the 1-48 h. Upon completion (monitored by TLC, visualized by UV light), the reaction solution was concentrated in vacuo. The crude product was purified by column chromatography on silica gel (eluent PE:EtOAc = 8:1 to 5:1) to afford pure products **5**.

#### 1',3'-diphenyl-1',3',3a',8a'-tetrahydro-3H,8'H-spiro[benzofuran-2,2'-cyclopenta[a]indene]-3,8'-dione (**5a**)

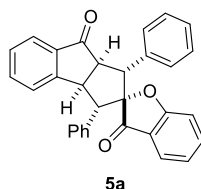

Yellow solid obtained by column chromatography (petroleum ether/ethyl acetate = 8:1 to 5:1), 73.5 mg, 83% yield, m.p. 213.4-214.1 °C. <sup>1</sup>H NMR (500 MHz, CDCl<sub>3</sub>) δ 7.79 (d, *J* = 7.6 Hz, 1H), 7.49 (td, *J* = 7.4, 1.3 Hz, 1H), 7.42 (t, *J* = 7.4 Hz, 1H), 7.41 – 7.28 (m, 5H), 7.26 – 7.17 (m, 3H), 7.19 – 7.11 (m, 3H), 7.12 – 7.05 (m, 1H), 7.01 (d, *J* = 7.6

Hz, 1H), 6.90 (d,  $J = 8.4$  Hz, 1H), 6.72 (t,  $J = 7.4$  Hz, 1H), 4.70 (dd,  $J = 10.4, 8.3$  Hz, 1H), 4.04 (dd,  $J = 10.2, 8.3$  Hz, 1H), 3.95 (d,  $J = 10.2$  Hz, 1H), 3.67 (d,  $J = 10.4$  Hz, 1H) ppm.  $^{13}\text{C}$  NMR (125 MHz,  $\text{CDCl}_3$ )  $\delta$  205.4, 199.2, 171.1, 155.4, 138.0, 135.4, 134.9, 134.8, 129.2, 129.0, 128.5, 128.4, 128.2, 127.8, 127.6, 125.4, 124.7, 123.8, 121.7, 121.5, 112.6, 103.2, 59.7, 56.0, 55.1, 49.4 ppm. HRMS (ESI) calcd. for  $\text{C}_{31}\text{H}_{23}\text{O}_3$   $[\text{M} + \text{H}]^+$  443.1642, found: 443.1639.

**1'-(4-methoxyphenyl)-3'-phenyl-1',3',3a',8a'-tetrahydro-3H,8'H-spiro[benzofuran-2,2'-cyclopenta[a]indene]-3,8'-dione (5b)**

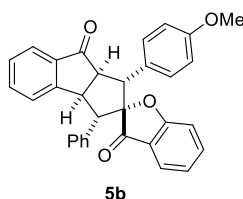

Yellow solid obtained by column chromatography (petroleum ether/ethyl acetate = 8:1 to 5:1), 72.8 mg, 77% yield, m.p. 95.2-96.2 °C.  $^1\text{H}$  NMR (500 MHz,  $\text{CDCl}_3$ )  $\delta$  7.60 (d,  $J = 7.6$  Hz, 1H), 7.49 (td,  $J = 7.5, 1.3$  Hz, 1H), 7.41 – 7.37 (m, 1H), 7.37 – 7.33 (m, 1H), 7.26 – 7.21 (m, 2H), 7.16 – 7.09 (m, 5H), 7.08 – 7.03 (m, 1H), 6.97 (d,  $J = 8.5$  Hz, 1H), 6.81 (d,  $J = 7.4$  Hz, 1H), 6.70 (t,  $J = 7.3$  Hz, 1H), 6.63 (d,  $J = 8.8$  Hz, 2H), 4.66 (dd,  $J = 10.6, 8.4$  Hz, 1H), 3.97 (dd,  $J = 10.3, 8.4$  Hz, 1H), 3.66 (d,  $J = 10.2$  Hz, 1H), 3.51 (s, 3H), 3.38 (d,  $J = 10.6$  Hz, 1H) ppm.  $^{13}\text{C}$  NMR (125 MHz,  $\text{CDCl}_3$ )  $\delta$  13C NMR (125 MHz,  $\text{DMSO}-d_6$ )  $\delta$  205.8, 198.9, 171.1, 158.9, 155.8, 139.2, 136.1, 135.5, 135.2, 130.4, 129.4, 129.1, 128.8, 128.2, 127.5, 125.6, 124.5, 123.9, 122.4, 121.5, 113.9, 113.3, 103.3, 59.7, 56.1, 55.3, 54.1, 49.0, 40.4, 40.4, 40.3, 40.2, 40.1, 40.0, 39.9, 39.9, 39.8, 39.6, 39.4. ppm. HRMS (ESI) calcd. for  $\text{C}_{32}\text{H}_{25}\text{O}_4$   $[\text{M} + \text{H}]^+$  473.1747, found: 473.1742.

**1'-(4-fluorophenyl)-3'-phenyl-1',3',3a',8a'-tetrahydro-3H,8'H-spiro[benzofuran-2,2'-cyclopenta[a]indene]-3,8'-dione (5c)**

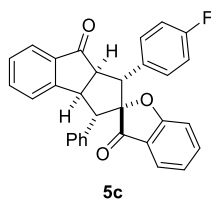

Yellow solid obtained by column chromatography (petroleum ether/ethyl acetate = 8:1 to 5:1), 59.9 mg, 65% yield, m.p. 95.1-96.0 °C. <sup>1</sup>H NMR (500 MHz, CDCl<sub>3</sub>) δ 7.71 (d, *J* = 7.6 Hz, 1H), 7.41 (td, *J* = 7.5, 1.4 Hz, 1H), 7.35 (td, *J* = 7.4, 1.0 Hz, 1H), 7.31 – 7.21 (m, 5H), 7.18 – 7.05 (m, 4H), 6.92 (d, *J* = 7.5 Hz, 1H), 6.86 – 6.74 (m, 3H), 6.67 (t, *J* = 7.4 Hz, 1H), 4.61 (dd, *J* = 10.3, 8.0 Hz, 1H), 3.93 – 3.79 (m, 2H), 3.57 (d, *J* = 10.4 Hz, 1H) ppm. <sup>13</sup>C NMR (125 MHz, CDCl<sub>3</sub>) δ 205.2, 199.0, 171.0, 162.2 (d, *J* = 246.0 Hz), 155.4, 138.2, 135.5, 135.3, 134.7, 130.7 (d, *J* = 3.2 Hz), 130.5 (d, *J* = 8.1 Hz), 129.1, 128.6, 128.4, 127.8, 125.4, 124.7, 123.8, 121.7, 121.7, 115.2 (d, *J* = 21.5 Hz), 112.6, 103.1, 59.6, 56.2, 54.3, 49.3 ppm. HRMS (ESI) calcd. for C<sub>31</sub>H<sub>22</sub>FO<sub>3</sub> [M + H]<sup>+</sup> 461.1547, found: 461.1565.

**1'-(4-chlorophenyl)-3'-phenyl-1',3',3a',8a'-tetrahydro-3H,8'H-spiro[benzofuran-2,2'-cyclopenta[a]indene]-3,8'-dione (5d)**

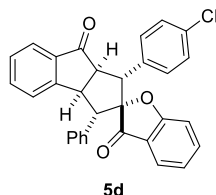

Yellow solid obtained by column chromatography (petroleum ether/ethyl acetate = 8:1 to 5:1), 54.4 mg, 57% yield, m.p. 66.2-67.2 °C. <sup>1</sup>H NMR (500 MHz, CDCl<sub>3</sub>) δ 7.79 (d, *J* = 7.6 Hz, 1H), 7.53 – 7.47 (m, 1H), 7.47 – 7.41 (m, 1H), 7.39 – 7.33 (m, 3H), 7.32 – 7.28 (m, 2H), 7.26 – 7.23 (m, 1H), 7.22 – 7.18 (m, 2H), 7.17 – 7.12 (m, 3H), 7.00 (d, *J* = 7.6 Hz, 1H), 6.92 (d, *J* = 8.4 Hz, 1H), 6.77 (t, *J* = 7.4 Hz, 1H), 4.68 (dd, *J* = 10.3, 8.1 Hz, 1H), 4.04 – 3.78 (m, 2H), 3.64 (d, *J* = 10.3 Hz, 1H) ppm. <sup>13</sup>C NMR (125 MHz, DMSO-*d*<sub>6</sub>) δ 205.6, 198.6, 171.0, 155.8, 139.4, 136.2, 135.4, 135.0, 134.7, 132.6, 131.1, 129.4, 129.1, 128.9, 128.6, 128.3, 125.6, 124.5, 123.9, 122.6, 121.4, 113.3, 103.0, 59.6, 55.8, 53.9, 49.0 ppm. HRMS (ESI) calcd. for C<sub>31</sub>H<sub>22</sub>ClO<sub>3</sub> [M + H]<sup>+</sup> 477.1252, found: 477.1257.

**3'-phenyl-1'-(4-(trifluoromethyl)phenyl)-1',3',3a',8a'-tetrahydro-3H,8'H-spiro[benzofuran-2,2'-cyclopenta[a]indene]-3,8'-dione (5e)**

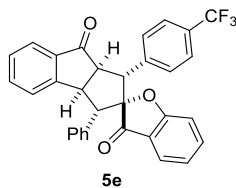

Yellow solid obtained by column chromatography (petroleum ether/ethyl acetate = 8:1 to 5:1), 44.9 mg, 44% yield, m.p. 116.6-117.5 °C. <sup>1</sup>H NMR (500 MHz, CDCl<sub>3</sub>) δ 7.80 (d, *J* = 7.6 Hz, 1H), 7.52 – 7.47 (m, 3H), 7.44 (t, *J* = 7.6 Hz, 3H), 7.38 – 7.33 (m, 3H), 7.26 – 7.23 (m, 1H), 7.23 – 7.18 (m, 2H), 7.18 – 7.12 (m, 1H), 7.05 – 6.96 (m, 1H), 6.91 (d, *J* = 8.5 Hz, 1H), 6.76 (t, *J* = 7.4 Hz, 1H), 4.72 (dd, *J* = 10.1, 7.0 Hz, 1H), 4.01 (d, *J* = 6.4 Hz, 2H), 3.66 (d, *J* = 10.4 Hz, 1H) ppm. <sup>13</sup>C NMR (125 MHz, CDCl<sub>3</sub>) δ 205.7, 198.7, 170.9, 155.3, 139.2, 138.3, 135.6, 135.2, 134.4, 129.7 (q, *J* = 32.5 Hz), 129.4, 129.1, 128.7, 128.5, 127.9, 125.4, 125.2 (q, *J* = 3.8 Hz), 124.8, 124.0 (q, *J* = 270.5 Hz), 123.9, 121.9, 121.5, 112.6, 102.8, 59.9, 56.1, 54.4, 49.3 ppm. HRMS (ESI) calcd. for C<sub>32</sub>H<sub>22</sub>F<sub>3</sub>O<sub>3</sub> [M + H]<sup>+</sup> 511.1516, found: 511.1520.

**1'-(3-methoxyphenyl)-3'-phenyl-1',3',3a',8a'-tetrahydro-3H,8'H-spiro[benzofuran-2,2'-cyclopenta[a]indene]-3,8'-dione (5f)**

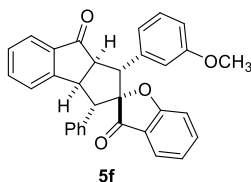

Yellow solid obtained by column chromatography (petroleum ether/ethyl acetate = 8:1 to 5:1), 66.2 mg, 70% yield, m.p. 84.3-85.2 °C. <sup>1</sup>H NMR (500 MHz, CDCl<sub>3</sub>) δ 7.72 (d, *J* = 7.6 Hz, 1H), 7.41 (td, *J* = 7.4, 1.2 Hz, 1H), 7.35 (t, *J* = 7.4 Hz, 1H), 7.31 – 7.22 (m, 3H), 7.19 – 7.15 (m, 1H), 7.12 (t, *J* = 7.3 Hz, 2H), 7.07 (d, *J* = 7.2 Hz, 1H), 6.99 (t, *J* = 7.9 Hz, 1H), 6.92 (d, *J* = 7.5 Hz, 1H), 6.88 – 6.82 (m, 3H), 6.66 (t, *J* = 7.4 Hz, 1H), 6.56 (dd, *J* = 8.0, 2.2 Hz, 1H), 4.68 – 4.56 (m, 1H), 3.93 (dd, *J* = 10.2, 8.4 Hz, 1H), 3.84 (d, *J* = 10.2 Hz, 1H), 3.62 (s, 3H), 3.57 (d, *J* = 10.4 Hz, 1H) ppm. <sup>13</sup>C NMR (125 MHz, CDCl<sub>3</sub>) δ 205.3, 199.1, 171.1, 159.3, 155.4, 138.0, 136.5, 135.4, 134.8, 129.2, 129.1,

128.5, 128.4, 128.4, 127.8, 125.4, 124.7, 123.9, 121.8, 121.6, 121.5, 114.4, 113.4, 112.6, 103.1, 59.8, 56.1, 55.2, 54.9, 49.4 ppm. HRMS (ESI) calcd. for C<sub>32</sub>H<sub>25</sub>O<sub>4</sub> [M + H]<sup>+</sup> 473.1747, found: 473.1746.

**1'-(3-fluorophenyl)-3'-phenyl-1',3',3a',8a'-tetrahydro-3H,8'H-spiro[benzofuran-2,2'-cyclopenta[a]indene]-3,8'-dione (5g)**

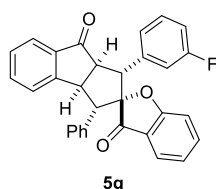

Yellow solid obtained by column chromatography (petroleum ether/ethyl acetate = 8:1 to 5:1), 75.5 mg, 82% yield, m.p. 74.0-74.9 °C. <sup>1</sup>H NMR (500 MHz, CDCl<sub>3</sub>) δ 7.79 (d, *J* = 7.6 Hz, 1H), 7.49 (td, *J* = 7.5, 1.4 Hz, 1H), 7.43 (t, *J* = 7.4 Hz, 1H), 7.39 – 7.31 (m, 3H), 7.28 – 7.23 (m, 1H), 7.23 – 7.19 (m, 2H), 7.18 – 7.11 (m, 2H), 7.11 – 7.07 (m, 2H), 7.02 – 6.98 (m, 1H), 6.93 (d, *J* = 8.4 Hz, 1H), 6.83 – 6.71 (m, 2H), 4.70 (dd, *J* = 10.4, 8.0 Hz, 1H), 4.00 – 3.89 (m, 2H), 3.65 (d, *J* = 10.4 Hz, 1H) ppm. <sup>13</sup>C NMR (125 MHz, CDCl<sub>3</sub>) δ 205.1, 198.8, 171.0, 162.6 (d, *J* = 245.4 Hz), 155.3, 138.2, 137.5 (d, *J* = 7.4 Hz), 135.5, 135.2, 134.6, 129.7 (d, *J* = 8.5 Hz), 129.2, 128.6, 128.5, 127.9, 125.4, 124.9 (d, *J* = 2.7 Hz), 124.7, 123.9, 121.8, 121.6, 115.8 (d, *J* = 22.1 Hz), 114.6 (d, *J* = 21.1 Hz), 112.6, 102.9, 59.7, 56.1, 54.5, 49.3 ppm. HRMS (ESI) calcd. for C<sub>31</sub>H<sub>22</sub>FO<sub>3</sub> [M + H]<sup>+</sup> 461.1547, found: 461.1550.

**1'-(3-chlorophenyl)-3'-phenyl-1',3',3a',8a'-tetrahydro-3H,8'H-spiro[benzofuran-2,2'-cyclopenta[a]indene]-3,8'-dione (5h)**

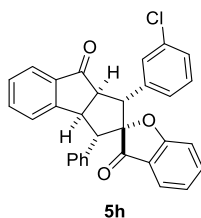

Yellow solid obtained by column chromatography (petroleum ether/ethyl acetate = 8:1 to 5:1), 14.3 mg, 15% yield, m.p. 85.3-86.2 °C. <sup>1</sup>H NMR (500 MHz, CDCl<sub>3</sub>) δ 7.72 (d, *J* = 7.6 Hz, 1H), 7.41 (t, *J* = 7.1 Hz, 1H), 7.39 – 7.32 (m, 2H), 7.28 (t, *J* = 8.4 Hz, 3H), 7.20 – 7.15 (m, 1H), 7.16 – 7.04 (m, 4H), 6.99 (d, *J* = 4.6 Hz, 2H), 6.92 (d, *J* = 7.5 Hz,



1H), 6.86 (d,  $J = 8.5$  Hz, 1H), 6.68 (t,  $J = 7.5$  Hz, 1H), 4.67 – 4.56 (m, 1H), 3.94 – 3.84 (m, 1H), 3.82 (d,  $J = 10.2$  Hz, 1H), 3.56 (d,  $J = 10.4$  Hz, 1H) ppm.  $^{13}\text{C}$  NMR (125 MHz,  $\text{CDCl}_3$ )  $\delta$  205.1, 198.8, 171.0, 155.3, 138.3, 137.1, 135.5, 135.2, 134.5, 134.0, 129.5, 129.2, 129.0, 128.6, 128.5, 127.9, 127.8, 127.4, 125.4, 124.7, 123.9, 121.8, 121.6, 112.6, 102.8, 59.66, 56.2, 54.5, 49.4 ppm. HRMS (ESI) calcd. for  $\text{C}_{31}\text{H}_{22}\text{ClO}_3$   $[\text{M} + \text{H}]^+$  477.1252, found: 477.1251.

**1'-(3-bromophenyl)-3'-phenyl-1',3',3a',8a'-tetrahydro-3H,8'H-spiro[benzofuran-2,2'-cyclopenta[a]indene]-3,8'-dione (5i)**

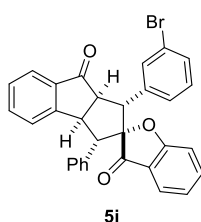

Yellow solid obtained by column chromatography (petroleum ether/ethyl acetate = 8:1 to 5:1), 26.1 mg, 25% yield, m.p. 103.2-104.1 °C.  $^1\text{H}$  NMR (500 MHz,  $\text{CDCl}_3$ )  $\delta$  7.71 (d,  $J = 7.5$  Hz, 1H), 7.50 (s, 1H), 7.40 (t,  $J = 7.0$  Hz, 1H), 7.34 (t,  $J = 7.4$  Hz, 1H), 7.30 – 7.22 (m, 3H), 7.19 – 7.10 (m, 5H), 7.10 – 7.06 (m, 1H), 6.92 (t,  $J = 8.0$  Hz, 2H), 6.87 (d,  $J = 8.4$  Hz, 1H), 6.66 (t,  $J = 7.4$  Hz, 1H), 4.62 (dd, 1H), 3.87 (dd,  $J = 10.0, 8.4$  Hz, 1H), 3.80 (d,  $J = 10.1$  Hz, 1H), 3.56 (d,  $J = 10.5$  Hz, 1H) ppm.  $^{13}\text{C}$  NMR (125 MHz,  $\text{CDCl}_3$ )  $\delta$  205.1, 198.7, 171.0, 155.3, 138.3, 137.4, 135.5, 135.2, 134.5, 131.9, 130.7, 129.8, 129.2, 128.6, 128.5, 127.9, 127.9, 125.4, 124.7, 123.9, 122.3, 121.8, 121.6, 112.6, 102.8, 59.6, 56.2, 54.5, 49.4 ppm. HRMS (ESI) calcd. for  $\text{C}_{31}\text{H}_{22}\text{BrO}_3$   $[\text{M} + \text{H}]^+$  521.0747, found: 521.0753.

**1'-(2-methoxyphenyl)-3'-phenyl-1',3',3a',8a'-tetrahydro-3H,8'H-spiro[benzofuran-2,2'-cyclopenta[a]indene]-3,8'-dione (5j)**

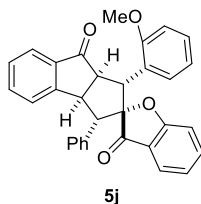

Yellow solid obtained by column chromatography (petroleum ether/ethyl acetate = 8:1 to 5:1), 68.0 mg, 72% yield, m.p. 181.3-182.0 °C.  $^1\text{H}$  NMR (500 MHz,  $\text{CDCl}_3$ )  $\delta$  7.78

(d,  $J = 7.6$  Hz, 1H), 7.59 (dd,  $J = 7.8, 1.6$  Hz, 1H), 7.48 (td,  $J = 7.5, 1.3$  Hz, 1H), 7.45 – 7.38 (m, 1H), 7.40 – 7.35 (m, 2H), 7.33 – 7.26 (m, 1H), 7.25–7.24 (m, , 1H), 7.23 – 7.17 (m, 2H), 7.18 – 7.11 (m, 1H), 7.09 – 7.01 (m, 1H), 7.02 – 6.97 (m, 1H), 6.88 – 6.81 (m, 2H), 6.77 – 6.69 (m, 1H), 6.62 (dd,  $J = 8.3, 1.1$  Hz, 1H), 4.74 – 4.55 (m, 2H), 4.02 (dd,  $J = 10.0, 8.4$  Hz, 1H), 3.72 (d,  $J = 10.5$  Hz, 1H), 3.64 (s, 3H) ppm.  $^{13}\text{C}$  NMR (125 MHz, DMSO- $d_6$ )  $\delta$  206.3, 198.2, 170.5, 157.3, 155.9, 138.7, 136.1, 135.3, 135.2, 130.0, 129.5, 129.15, 128.8, 128.8, 128.2, 125.6, 124.5, 124.0, 123.6, 122.2, 121.6, 120.4, 113.1, 111.1, 102.4, 60.1, 56.2, 55.7, 49.3, 46.3 ppm. HRMS (ESI) calcd. for  $\text{C}_{32}\text{H}_{25}\text{O}_4$   $[\text{M} + \text{H}]^+$  473.1747, found: 473.1746.

**3'-phenyl-1'-(*o*-tolyl)-1',3',3a',8a'-tetrahydro-3H,8'H-spiro[benzofuran-2,2'-cyclopenta[*a*]indene]-3,8'-dione (5k)**

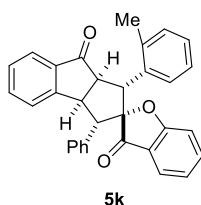

Brown solid obtained by column chromatography (petroleum ether/ethyl acetate = 8:1 to 5:1), 65.7 mg, 72% yield, m.p. 104.2–105.3 °C.  $^1\text{H}$  NMR (500 MHz,  $\text{CDCl}_3$ )  $\delta$  7.80 (d,  $J = 7.5$  Hz, 1H), 7.68 (d,  $J = 7.8$  Hz, 1H), 7.48 (td,  $J = 7.4, 1.3$  Hz, 1H), 7.43 (t,  $J = 7.2$  Hz, 1H), 7.40 – 7.36 (m, 2H), 7.34 (ddd,  $J = 8.5, 7.3, 1.4$  Hz, 1H), 7.25 – 7.18 (m, 3H), 7.17 – 7.13 (m, 1H), 7.07 (td,  $J = 8.0, 7.3, 2.2$  Hz, 1H), 7.02 – 6.91 (m, 4H), 6.72 (t,  $J = 7.5$  Hz, 1H), 4.73 (dd,  $J = 10.6, 8.4$  Hz, 1H), 4.41 (d,  $J = 9.9$  Hz, 1H), 3.89 (dd,  $J = 9.9, 8.4$  Hz, 1H), 3.67 (d,  $J = 10.6$  Hz, 1H), 2.32 (s, 3H) ppm.  $^{13}\text{C}$  NMR (125 MHz,  $\text{CDCl}_3$ )  $\delta$  205.8, 199.4, 171.0, 155.3, 138.0, 137.1, 135.4, 135.3, 134.8, 133.9, 130.3, 129.2, 129.1, 128.5, 128.4, 127.8, 127.1, 125.6, 125.4, 124.6, 123.8, 121.5, 121.5, 112.6, 103.0, 60.2, 58.5, 49.6, 49.0, 20.3 ppm. HRMS (ESI) calcd. for  $\text{C}_{32}\text{H}_{25}\text{O}_3$   $[\text{M} + \text{H}]^+$  457.1798, found: 457.1806.

**1'-(2-fluorophenyl)-3'-phenyl-1',3',3a',8a'-tetrahydro-3H,8'H-spiro[benzofuran-2,2'-cyclopenta[*a*]indene]-3,8'-dione (5l)**

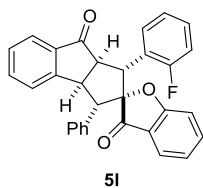

Yellow solid obtained by column chromatography (petroleum ether/ethyl acetate = 8:1 to 5:1), 75.5 mg, 82% yield, m.p. 134.6-135.1 °C. <sup>1</sup>H NMR (500 MHz, CDCl<sub>3</sub>) δ 7.79 (d, *J* = 7.7 Hz, 1H), 7.57 – 7.52 (m, 1H), 7.51 – 7.45 (m, 1H), 7.45 – 7.40 (m, 1H), 7.40 – 7.36 (m, 2H), 7.34 – 7.29 (m, 1H), 7.28 – 7.25 (m, 1H), 7.23 – 7.18 (m, 2H), 7.17 – 7.12 (m, 1H), 7.09 – 7.03 (m, 1H), 7.02 – 6.95 (m, 2H), 6.92 (d, *J* = 8.4 Hz, 1H), 6.89 – 6.84 (m, 1H), 6.73 (t, *J* = 7.3 Hz, 1H), 4.72 (dd, *J* = 10.5, 8.4 Hz, 1H), 4.34 (d, *J* = 9.9 Hz, 1H), 4.06 (dd, *J* = 9.9, 8.4 Hz, 1H), 3.68 (d, *J* = 10.5 Hz, 1H) ppm. <sup>13</sup>C NMR (125 MHz, CDCl<sub>3</sub>) δ 205.2, 198.5, 170.9, 161.0 (d, *J* = 248.0 Hz), 155.3, 138.0, 135.4, 135.3, 134.7, 130.6 (d, *J* = 3.5 Hz), 129.2, 129.1 (d, *J* = 8.5 Hz), 128.6, 128.4, 127.8, 125.4, 124.7, 123.9, 123.8 (d, *J* = 3.6 Hz), 122.2 (d, *J* = 13.2 Hz), 121.6, 121.4, 115.5 (d, *J* = 23.0 Hz), 112.5, 102.8, 59.7, 55.9, 49.5, 47.4 ppm. HRMS (ESI) calcd. for C<sub>31</sub>H<sub>22</sub>FO<sub>3</sub> [M + H]<sup>+</sup> 461.1547, found: 461.1553.

**1'-(2-chlorophenyl)-3'-phenyl-1',3',3a',8a'-tetrahydro-3H,8'H-spiro[benzofuran-2,2'-cyclopenta[a]indene]-3,8'-dione (5m)**

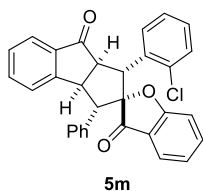

Yellow solid obtained by column chromatography (petroleum ether/ethyl acetate = 8:1 to 5:1), 73.5 mg, 77% yield, m.p. 227.5-228.3 °C. <sup>1</sup>H NMR (500 MHz, DMSO-*d*<sub>6</sub>) δ 7.91 – 7.80 (m, 1H), 7.74 (d, *J* = 7.7 Hz, 1H), 7.61 (td, *J* = 7.5, 1.3 Hz, 1H), 7.52 (t, *J* = 7.4 Hz, 1H), 7.51 – 7.43 (m, 1H), 7.38 (d, *J* = 7.3 Hz, 2H), 7.32 – 7.21 (m, 5H), 7.22 – 7.10 (m, 2H), 7.09 (d, *J* = 8.4 Hz, 1H), 6.93 (d, *J* = 7.7 Hz, 1H), 6.83 (t, *J* = 7.4 Hz, 1H), 4.85 (dd, *J* = 10.8, 8.4 Hz, 1H), 4.55 (d, *J* = 9.6 Hz, 1H), 4.07 (t, *J* = 8.9 Hz, 1H), 3.55 (d, *J* = 10.8 Hz, 1H) ppm. <sup>13</sup>C NMR (125 MHz, DMSO-*d*<sub>6</sub>) δ 205.6, 197.9, 170.7, 155.7, 139.2, 136.3, 135.1, 134.9, 133.8, 133.7, 131.81, 129.5, 129.5, 129.4, 129.2, 128.9, 128.3, 127.3, 125.7, 124.6, 124.0, 122.6,

121.2, 113.3, 102.1, 60.0, 58.0, 49.2, 49.2 ppm. HRMS (ESI) calcd. for C<sub>31</sub>H<sub>22</sub>ClO<sub>3</sub> [M + H]<sup>+</sup> 477.1252, found: 477.1249.

**1'-(2-bromophenyl)-3'-phenyl-1',3',3a',8a'-tetrahydro-3H,8'H-spiro[benzofuran-2,2'-cyclopenta[a]indene]-3,8'-dione (5n)**

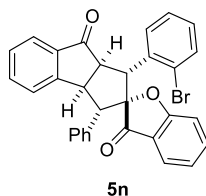

Yellow solid, 54.4 mg, 70 % yield, m.p. 226.6-227.4 °C. <sup>1</sup>H NMR (400 MHz, DMSO-*d*<sub>6</sub>) δ 7.84 (d, *J* = 7.9 Hz, 1H), 7.74 (d, *J* = 7.6 Hz, 1H), 7.62 (t, *J* = 7.5 Hz, 1H), 7.55 – 7.49 (m, 1H), 7.49 – 7.42 (m, 2H), 7.38 (d, *J* = 7.3 Hz, 2H), 7.33 – 7.23 (m, 4H), 7.20 – 7.14 (m, 1H), 7.11 – 7.01 (m, 2H), 6.93 (d, *J* = 7.6 Hz, 1H), 6.83 (t, *J* = 7.4 Hz, 1H), 4.84 (t, 1H), 4.55 (d, *J* = 9.6 Hz, 1H), 4.02 (t, *J* = 9.0 Hz, 1H), 3.53 (d, *J* = 10.7 Hz, 1H) ppm. <sup>13</sup>C NMR (125 MHz, DMSO-*d*<sub>6</sub>) δ 205.4, 197.8, 170.7, 155.8, 139.2, 136.3, 135.5, 135.1, 134.9, 132.9, 131.9, 129.7, 129.5, 129.3, 128.9, 128.3, 127.8, 125.7, 125.1, 124.6, 124.0, 122.6, 121.2, 113.3, 102.1, 60.1, 58.4, 51.8, 49.8 ppm. HRMS (ESI) calcd. for C<sub>31</sub>H<sub>22</sub>BrO<sub>3</sub> [M + H]<sup>+</sup> 521.0747, found: 521.0744.

**3'-phenyl-1'-(2-(trifluoromethyl)phenyl)-1',3',3a',8a'-tetrahydro-3H,8'H-spiro[benzofuran-2,2'-cyclopenta[a]indene]-3,8'-dione (5o)**

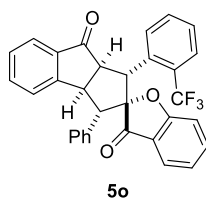

Yellow solid obtained by column chromatography (petroleum ether/ethyl acetate = 8:1 to 5:1), 27.6 mg, 27% yield, m.p. 92.3-93.3 °C. <sup>1</sup>H NMR (500 MHz, CDCl<sub>3</sub>) δ 8.04 (d, *J* = 8.0 Hz, 1H), 7.79 (d, *J* = 7.6 Hz, 1H), 7.55 – 7.47 (m, 2H), 7.44 (q, *J* = 6.9 Hz, 2H), 7.42 – 7.37 (m, 2H), 7.40 – 7.30 (m, 1H), 7.22 (dd, *J* = 8.2, 6.3 Hz, 4H), 7.20 – 7.13 (m, 1H), 7.01 (d, *J* = 7.6 Hz, 1H), 6.97 (d, *J* = 8.4 Hz, 1H), 6.76 (t, *J* = 7.5 Hz, 1H), 4.69 (t, *J* = 9.2 Hz, 1H), 4.35 (d, *J* = 9.9 Hz, 1H), 3.90 (t, *J* = 9.1 Hz, 1H), 3.77 (d, *J* = 10.3 Hz, 1H) ppm. <sup>13</sup>C NMR (125 MHz, DMSO-*d*<sub>6</sub>) δ 204.5, 197.2, 170.4, 155.6, 139.3, 136.3, 134.9, 134.9 (d, *J* = 13.4 Hz), 132.8, 132.4, 129.6, 129.3, 128.9, 128.4, 128.4 (d,

$J = 6.6$  Hz), 128.2, 126.0, 125.9, 125.7, 124.3 (q,  $J = 549.1, 274.7$  Hz), 124.6, 124.0, 122.7, 121.1, 113.3, 101.8, 60.3, 60.0, 49.1, 48.7 ppm. HRMS (ESI) calcd. for  $C_{32}H_{22}F_3O_3$   $[M + H]^+$  511.1516, found: 511.1523.

## 5. Experimental procedures for gram-scale synthesis of compound **3da**.

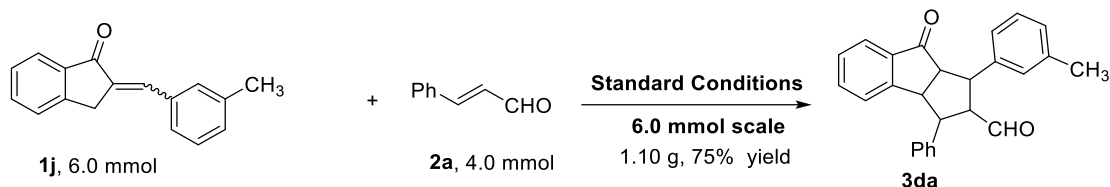

A mixture of DABCO (4.0 mmol, 1.0 equiv.), EtONa (4.0 mmol, 1.0 equiv.), **1j** (6.0 mmol, 1.5 equiv.) and **2a** (4.0 mmol, 1.0 equiv.) and dimethyl carbonate (20.0 mL) were added to a round-bottom flask equipped with a stir bar. The tube was then sealed and the resulting mixture was stirred at 90 °C for the 24 h. Upon completion (monitored by TLC, visualized by UV light), the reaction solution was concentrated in vacuo. The crude product was purified by column chromatography on silica gel (eluent PE:EtOAc = 10:1) to afford pure products **3da** in a 75% yield.

## 6. Experimental procedures for synthesis of compounds **6**.

A mixture of **3da** (45 mg, 0.123 mmol, 1.0 equiv.), 1-(triphenylphosphoranylidene)propan-2-one (48.9 mg, 0.148 mmol, 1.2 equiv.) and chloroform (5 mL) were added to a sealed reaction tube equipped with a stir bar. The tube was then sealed and the resulting mixture was stirred at 60 °C for the 12 h. Upon completion (monitored by TLC, visualized by UV light), the reaction solution was concentrated in vacuo. The crude product was purified by column chromatography on silica gel (eluent PE:EtOAc = 15:1 to 3:1) to afford pure products **6**.

**2-(3-oxobut-1-en-1-yl)-3-phenyl-1-(m-tolyl)-2,3,3a,8a-tetrahydrocyclopenta[a]inden-8(1H)-one (6)**

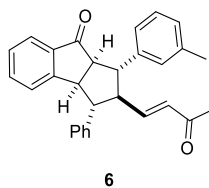

Yellow solid, 34.5 mg, 69% yield, m.p. 53.2-54.2 °C. <sup>1</sup>H NMR (500 MHz, CDCl<sub>3</sub>) δ 7.70 (d, *J* = 7.6 Hz, 1H), 7.43 (td, *J* = 7.5, 1.2 Hz, 1H), 7.36 – 7.30 (m, 3H), 7.27 – 7.21 (m, 3H), 7.18 (s, 1H), 7.17 – 7.10 (m, 2H), 7.00 (d, *J* = 7.3 Hz, 1H), 6.95 (d, *J* = 8.1 Hz, 1H), 6.36 (dd, *J* = 16.0, 7.9 Hz, 1H), 5.58 (d, *J* = 16.6 Hz, 1H), 4.05 (t, *J* = 9.0 Hz, 1H), 3.52 – 3.27 (m, 2H), 3.15 (dd, *J* = 11.0, 8.4 Hz, 1H), 2.74 (dd, *J* = 11.5, 9.6 Hz, 1H), 2.31 (s, 3H), 1.92 (s, 3H) ppm. <sup>13</sup>C NMR (125 MHz, CDCl<sub>3</sub>) δ 206.49, 197.95, 155.49, 145.6, 141.1, 140.0, 138.4, 135.2, 135.1, 132.2, 129.1, 128.8, 128.6, 128.3, 128.0, 127.9, 127.5, 125.6, 124.8, 124.6, 60.7, 59.7, 59.0, 52.7, 52.4, 27.0, 21.6 ppm. HRMS (ESI) calcd. for C<sub>29</sub>H<sub>27</sub>O<sub>2</sub> [M + H]<sup>+</sup> 407.2006, found: 407.2006.

## 7. Experimental procedures for synthesis of compounds 7.

A mixture of **3da** (45 mg, 0.123 mmol, 1.0 equiv), 1-cyclopropyl-2-(triphenyl-lambda5-phosphanylidene)ethan-1-one (52.9 mg, 0.148 mmol, 1.2 equiv.) and chloroform (5 mL) were added to a sealed reaction tube equipped with a stir bar. The tube was then sealed and the resulting mixture was stirred at 60 °C for the 12 h. Upon completion (monitored by TLC, visualized by UV light), the reaction solution was concentrated in vacuo. The crude product was purified by column chromatography on silica gel (eluent PE:EtOAc = 20:1 to 8:1) to afford pure products **7**.

### 2-(3-cyclopropyl-3-oxoprop-1-en-1-yl)-3-phenyl-1-(*m*-tolyl)-2,3,3a,8a-tetrahydrocyclopenta [a]inden-8(1H)-one (**7**)

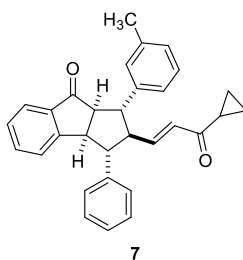

Yellow solid, 20.7 mg, 39% yield, m.p. 51.9-52.5 °C. <sup>1</sup>H NMR (500 MHz, DMSO-*d*<sub>6</sub>) δ 7.59 (d, *J* = 7.6 Hz, 1H), 7.52 (dt, *J* = 7.5, 1.1 Hz, 1H), 7.40 (d, *J* = 8.0 Hz, 3H), 7.33

(t,  $J = 7.6$  Hz, 2H), 7.26 (s, 1H), 7.24 – 7.13 (m, 3H), 6.98 (d,  $J = 7.3$  Hz, 1H), 6.88 (d,  $J = 7.6$  Hz, 1H), 6.56 (dd,  $J = 15.8, 8.7$  Hz, 1H), 5.63 (d,  $J = 15.8$  Hz, 1H), 4.12 (t,  $J = 9.0$  Hz, 1H), 3.56 – 3.38 (m, 2H), 3.12 (dd,  $J = 10.9, 9.0$  Hz, 1H), 2.86 (dd,  $J = 11.4, 9.6$  Hz, 1H), 2.25 (s, 3H), 2.00 – 1.74 (m, 1H), 0.67 – 0.62 (m, 2H), 0.59 – 0.55 (m, 2H) ppm.  $^{13}\text{C}$  NMR (125 MHz, DMSO- $d_6$ )  $\delta$  206.6, 199.1, 156.4, 146.0, 142.2, 141.4, 137.9, 135.7, 135.5, 131.2, 129.2, 129.2, 128.8, 128.7, 128.7, 127.8, 127.4, 125.8, 125.8, 124.3, 61.3, 59.5, 58.5, 52.6, 52.6, 21.6, 18.5, 11.0, 10.94= ppm. HRMS (ESI) calcd. for  $\text{C}_{31}\text{H}_{28}\text{O}_2$   $[\text{M} + \text{H}]^+$  433.2162, found: 433.2160.

## 8. Experimental procedures for synthesis of compounds 8.

Solution of **3da** (45 mg, 0.123 mmol, 1.0 equiv.) in methanol (2 mL) was cooled to 0 °C. Then, sodium borohydride (14.0 mg, 0.369 mmol, 3 equiv.) was added to the solution at 0 °C and the resulting mixture was stirred at 0 °C for 1h, and quenched with saturated  $\text{NH}_4\text{Cl}$  aqueous solution (5 mL). The mixture was extracted with dichloromethane (5 mL x 3) and the combined organic phase was dried over anhydrous  $\text{MgSO}_4$ , filtered, and concentrated in vacuo. The crude product was purified by column chromatography on silica gel (eluent PE:EtOAc =15:1 to 5:1) to afford pure products **8**.

### 2-(hydroxymethyl)-3-phenyl-1-(*m*-tolyl)-1,2,3,3a,8,8a-hexahydrocyclopenta [a]inden-8-ol (**8**)

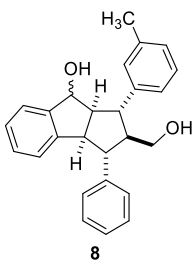

White solid, 44.6 mg, 98% yield, m.p. 167.9-168.9 °C.  $^1\text{H}$  NMR (500 MHz,  $\text{CDCl}_3$ )  $\delta$  7.35 – 7.28 (m, 5H), 7.23 – 7.09 (m, 6H), 6.97 (d,  $J = 6.9$  Hz, 1H), 6.90 (d,  $J = 7.5$  Hz, 1H), 5.22 (d,  $J = 8.0$  Hz, 1H), 3.77 (t,  $J = 8.7$  Hz, 1H), 3.43 (q,  $J = 9.4$  Hz, 1H), 3.35 – 3.20 (m, 3H), 2.95 (dd,  $J = 11.3, 8.1$  Hz, 1H), 2.56 – 2.37 (m, 1H), 2.29 (s, 3H) ppm.  $^{13}\text{C}$  NMR (125 MHz,  $\text{CDCl}_3$ )  $\delta$  145.3, 143.7, 143.6, 143.4, 138.5, 128.9, 128.8, 128.8,

128.8, 128.0, 127.5, 127.5, 126.7, 125.3, 125.1, 124.3, 75.4, 61.8, 60.4, 56.5, 56.3, 55.2, 47.1, 21.6 ppm. HRMS (ESI) calcd. for C<sub>26</sub>H<sub>27</sub>O<sub>2</sub> [M + H]<sup>+</sup> 371.2006, found: 371.2011.

## 9. Experimental procedures for synthesis of compounds 9.

A mixture of **3da** (45 mg, 0.123 mmol, 1.0 equiv.), 2-thenoyltrifluoroacetone (82.0 mg, 0.369 mmol, 3.0 equiv.), p-toluenesulfonic acid (10.5 mg, 0.061 mmol, 0.5 equiv.) and toluene (10 mL) were added to a sealed reaction tube equipped with a stir bar. The resulting mixture was stirred at 110 °C for the 10 h. Upon completion (monitored by TLC, visualized by UV light), the reaction solution was concentrated in vacuo. The crude product was purified by column chromatography on silica gel (eluent PE:EtOAc = 20:1 to 8:1) to afford pure products **9**.

### 4,4,4-trifluoro-2-((8-oxo-3-phenyl-1-(m-tolyl)-1,2,3,3a,8,8a-hexahydrocyclopenta[a]inden-2-yl)methylene)-1-(thiophen-2-yl)butane-1,3-dione (**9**)

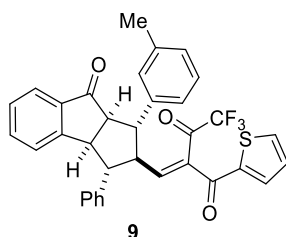

Red solid, 32.3 mg, 46% yield, m.p. 68.9-69.6 °C. <sup>1</sup>H NMR (500 MHz, CDCl<sub>3</sub>) δ 7.78 (d, *J* = 7.6 Hz, 1H), 7.54 (d, *J* = 4.7 Hz, 1H), 7.51 (t, *J* = 7.3 Hz, 1H), 7.42 (t, *J* = 7.5 Hz, 3H), 7.37 – 7.34 (m, 2H), 7.34 – 7.27 (m, 3H), 7.08 (d, *J* = 6.4 Hz, 1H), 7.05 (d, *J* = 7.6 Hz, 1H), 7.01 (dd, *J* = 4.9, 3.8 Hz, 1H), 6.76 (dd, *J* = 15.4, 7.6 Hz, 1H), 6.31 (d, *J* = 15.4 Hz, 1H), 4.17 (t, *J* = 9.0 Hz, 1H), 3.59 – 3.45 (m, 2H), 3.27 (dd, *J* = 11.1, 8.5 Hz, 1H), 2.87 (dd, *J* = 11.6, 9.5 Hz, 1H), 2.38 (s, 3H) ppm. <sup>13</sup>C NMR (125 MHz, CDCl<sub>3</sub>) δ 205.5, 180.6, 154.6, 144.8, 143.9, 140.2, 139.2, 137.4, 134.2, 134.1, 132.7, 130.8, 128.0, 127.8, 127.7, 127.3, 127.1, 126.9, 126.9, 126.4, 125.7, 124.6, 123.9, 123.5, 60.0, 58.6, 58.0, 51.5, 51.4, 20.6 ppm. HRMS (ESI) calcd. for C<sub>34</sub>H<sub>26</sub>F<sub>3</sub>O<sub>3</sub>S [M + H]<sup>+</sup> 571.1549, found: 571.1542.

## 10. X-ray crystal structure of compound 3fa

Crystal data for compound **3fa**: C<sub>25</sub>H<sub>19</sub>ClO<sub>2</sub>, *M* = 386.85, *a* = 22.4516(5) Å, *b* =



22.4516(5) Å,  $c = 7.6085(2)$  Å,  $\alpha = 90^\circ$ ,  $\beta = 90^\circ$ ,  $\gamma = 90^\circ$ ,  $V = 3835.2(2)$  Å<sup>3</sup>,  $T = 150(2)$  K, space group  $P-421c$ ,  $Z = 8$ ,  $\mu(\text{Cu K}\alpha) = 1.900$  mm<sup>-1</sup>, 42858 reflections measured, 3751 independent reflections ( $R_{int} = 0.3123$ ). The final  $R_I$  values were 0.0466 ( $I > 2\sigma(I)$ ). The final  $wR(F^2)$  values were 0.0790 ( $I > 2\sigma(I)$ ). The final  $R_I$  values were 0.0773 (all data). The final  $wR(F^2)$  values were 0.0880 (all data). The goodness of fit on  $F^2$  was 1.047. Flack parameter = 0.071(18).

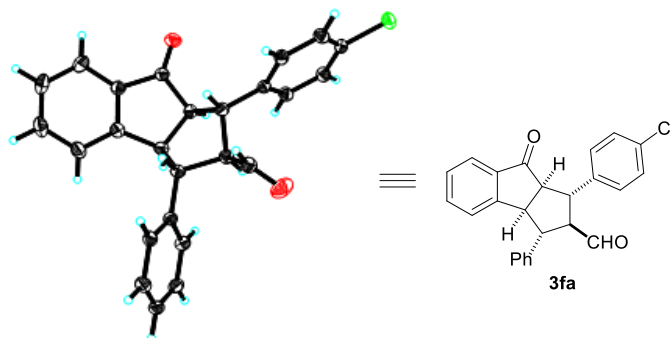

View of a molecule of compound **3fa** with the atom-labelling scheme.

Displacement ellipsoids are drawn at the 30% probability level.

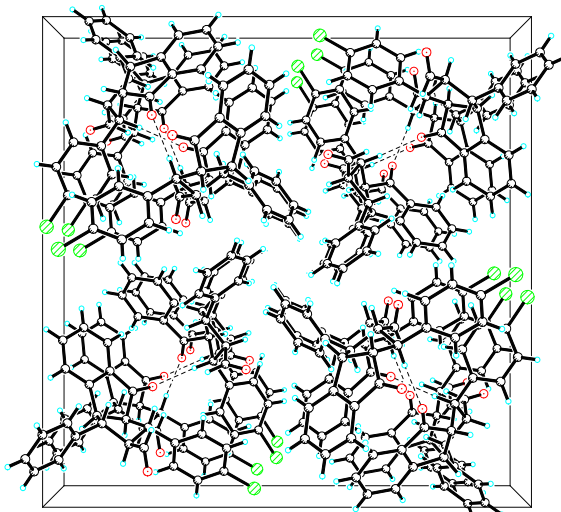

View of the pack drawing of compound **3fa**.

Hydrogen-bonds are shown as dashed lines.

**Table S2.** Crystal data and structure refinement for compound **3fa**.

|                     |                                                   |
|---------------------|---------------------------------------------------|
| Identification code | global                                            |
| Empirical formula   | C <sub>25</sub> H <sub>19</sub> Cl O <sub>2</sub> |
| Formula weight      | 386.85                                            |

|                                   |                                             |          |
|-----------------------------------|---------------------------------------------|----------|
| Temperature                       | 150(2) K                                    |          |
| Wavelength                        | 1.54178 Å                                   |          |
| Crystal system                    | Tetragonal                                  |          |
| Space group                       | P-42 <sub>1</sub> c                         |          |
| Unit cell dimensions              | a = 22.4516(5) Å                            | α = 90°. |
|                                   | b = 22.4516(5) Å                            | β = 90°. |
|                                   | c = 7.6085(2) Å                             | γ = 90°. |
| Volume                            | 3835.2(2) Å <sup>3</sup>                    |          |
| Z                                 | 8                                           |          |
| Density (calculated)              | 1.340 Mg/m <sup>3</sup>                     |          |
| Absorption coefficient            | 1.900 mm <sup>-1</sup>                      |          |
| F(000)                            | 1616                                        |          |
| Crystal size                      | 0.680 x 0.010 x 0.010 mm <sup>3</sup>       |          |
| Theta range for data collection   | 2.78 to 72.38°.                             |          |
| Index ranges                      | -27 ≤ h ≤ 27, -27 ≤ k ≤ 27, -9 ≤ l ≤ 7      |          |
| Reflections collected             | 42858                                       |          |
| Independent reflections           | 3751 [R(int) = 0.3123]                      |          |
| Completeness to theta = 72.38°    | 99.0 %                                      |          |
| Absorption correction             | Semi-empirical from equivalents             |          |
| Max. and min. transmission        | 0.98 and 0.65                               |          |
| Refinement method                 | Full-matrix least-squares on F <sup>2</sup> |          |
| Data / restraints / parameters    | 3751 / 0 / 253                              |          |
| Goodness-of-fit on F <sup>2</sup> | 1.047                                       |          |
| Final R indices [I > 2σ(I)]       | R1 = 0.0466, wR2 = 0.0790                   |          |
| R indices (all data)              | R1 = 0.0773, wR2 = 0.0880                   |          |
| Absolute structure parameter      | 0.071(18)                                   |          |
| Largest diff. peak and hole       | 0.230 and -0.222 e.Å <sup>-3</sup>          |          |

## 11. X-ray crystal structure of compound 5n

Crystal data for compound **5n**: C<sub>31</sub>H<sub>21</sub>BrO<sub>3</sub>, *M* = 521.39, *a* = 12.3698(5) Å, *b* = 17.4754(8) Å, *c* = 12.4146(5) Å, α = 90°, β = 117.668(2)°, γ = 90°, *V* = 2376.76(18) Å<sup>3</sup>,

$T = 150.2$  K, space group  $P121/c1$ ,  $Z = 4$ ,  $\mu(\text{Cu K}\alpha) = 2.611 \text{ mm}^{-1}$ , 37763 reflections measured, 4381 independent reflections ( $R_{int} = 0.0679$ ). The final  $R_I$  values were 0.0816 ( $I > 2\sigma(I)$ ). The final  $wR(F^2)$  values were 0.2020 ( $I > 2\sigma(I)$ ). The final  $R_I$  values were 0.1129 (all data). The final  $wR(F^2)$  values were 0.2545 (all data). The goodness of fit on  $F^2$  was 1.200.

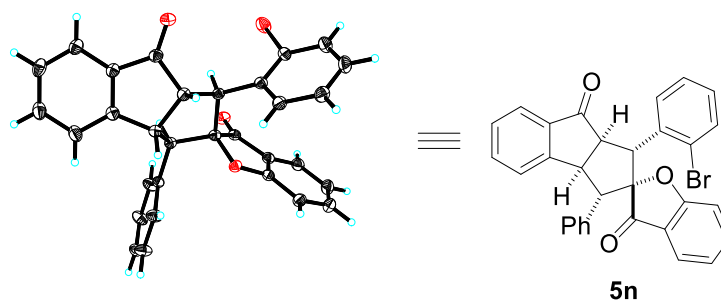

View of a molecule of compound **5n** with the atom-labelling scheme.

Displacement ellipsoids are drawn at the 30% probability level.

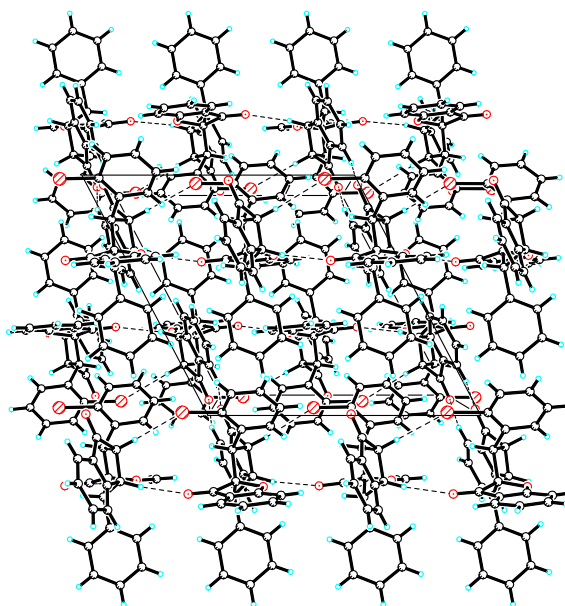

View of the pack drawing of compound **5o**.

Hydrogen-bonds are shown as dashed lines.

**Table S3.** Crystal data and structure refinement for compound **5o**.

|                     |                                             |
|---------------------|---------------------------------------------|
| Identification code | global                                      |
| Empirical formula   | $\text{C}_{31} \text{H}_{21} \text{Br O}_3$ |
| Formula weight      | 521.39                                      |

|                                   |                                             |          |
|-----------------------------------|---------------------------------------------|----------|
| Temperature                       | 150(2) K                                    |          |
| Wavelength                        | 1.54178 Å                                   |          |
| Crystal system                    | Monoclinic                                  |          |
| Space group                       | P 1 21/c 1                                  |          |
| Unit cell dimensions              | a = 12.3698(5) Å                            | α = 90°. |
|                                   | b = 17.4754(8) Å                            | β =      |
|                                   | 117.668(2)°.                                |          |
|                                   | c = 12.4146(5) Å                            | γ = 90°. |
| Volume                            | 2376.76(18) Å <sup>3</sup>                  |          |
| Z                                 | 4                                           |          |
| Density (calculated)              | 1.457 Mg/m <sup>3</sup>                     |          |
| Absorption coefficient            | 2.611 mm <sup>-1</sup>                      |          |
| F(000)                            | 1064                                        |          |
| Crystal size                      | 0.660 x 0.500 x 0.480 mm <sup>3</sup>       |          |
| Theta range for data collection   | 6.47 to 72.14°.                             |          |
| Index ranges                      | -14 ≤ h ≤ 15, -21 ≤ k ≤ 21, -15 ≤ l ≤ 14    |          |
| Reflections collected             | 37763                                       |          |
| Independent reflections           | 4381 [R(int) = 0.0679]                      |          |
| Completeness to theta = 72.14°    | 93.6 %                                      |          |
| Absorption correction             | Semi-empirical from equivalents             |          |
| Max. and min. transmission        | 0.37 and 0.10                               |          |
| Refinement method                 | Full-matrix least-squares on F <sup>2</sup> |          |
| Data / restraints / parameters    | 4381 / 0 / 317                              |          |
| Goodness-of-fit on F <sup>2</sup> | 1.200                                       |          |
| Final R indices [I > 2σ(I)]       | R1 = 0.0816, wR2 = 0.2020                   |          |
| R indices (all data)              | R1 = 0.1129, wR2 = 0.2545                   |          |
| Extinction coefficient            | 0.052(4)                                    |          |
| Largest diff. peak and hole       | 1.529 and -1.764 e.Å <sup>-3</sup>          |          |

#### Reference:

- (a) T. M. Kadayat, S. Banskota, P. Gurung, G. Bist, T. B. T. Magar, A. Shrestha, J.-A. Kim, E.-S. Lee, *Eur. J. Med. Chem.*, **2017**, *137*, 575-597; (b) B. Lantaño, J. M. Aguirre, E. V. Drago, M. Bollini, D. J. de la Faba, J. D. Mufato, *Synthetic Commun.*, **2017**, *47*, 2202-2214.

## 12. 2D NMR Analysis of 3qa, 3ra and 5n

Table S4. <sup>1</sup>H NMR signal assignment of 3qa

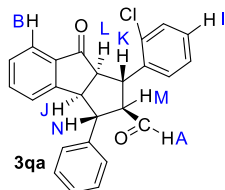

| No. | $\delta$                         | No. | $\delta$                          |
|-----|----------------------------------|-----|-----------------------------------|
| A   | 9.43 (d, $J = 4.2$ Hz, 1H)       | H   | 7.34 – 7.28 (m, 2H)               |
| B   | 7.92 (dd, $J = 7.9, 1.6$ Hz, 1H) | I   | 7.00 (dd, $J = 7.6, 0.9$ Hz, 1H)  |
| C   | 7.72 – 7.67 (m, 1H)              | J   | 4.35 (t, $J = 8.9$ Hz, 1H)        |
| D   | 7.66 – 7.61 (m, 1H)              | K   | 4.11 (dd, $J = 10.9, 8.7$ Hz, 1H) |
| E   | 7.53 – 7.49 (m, 3H)              | L   | 3.77 (t, $J = 8.5$ Hz, 1H)        |
| F   | 7.48 – 7.43 (m, 3H)              | M   | 3.55 (td, $J = 11.3, 4.3$ Hz, 1H) |
| G   | 7.42 – 7.40 (m, 2H)              | N   | 3.45 (dd, $J = 11.6, 9.4$ Hz, 1H) |

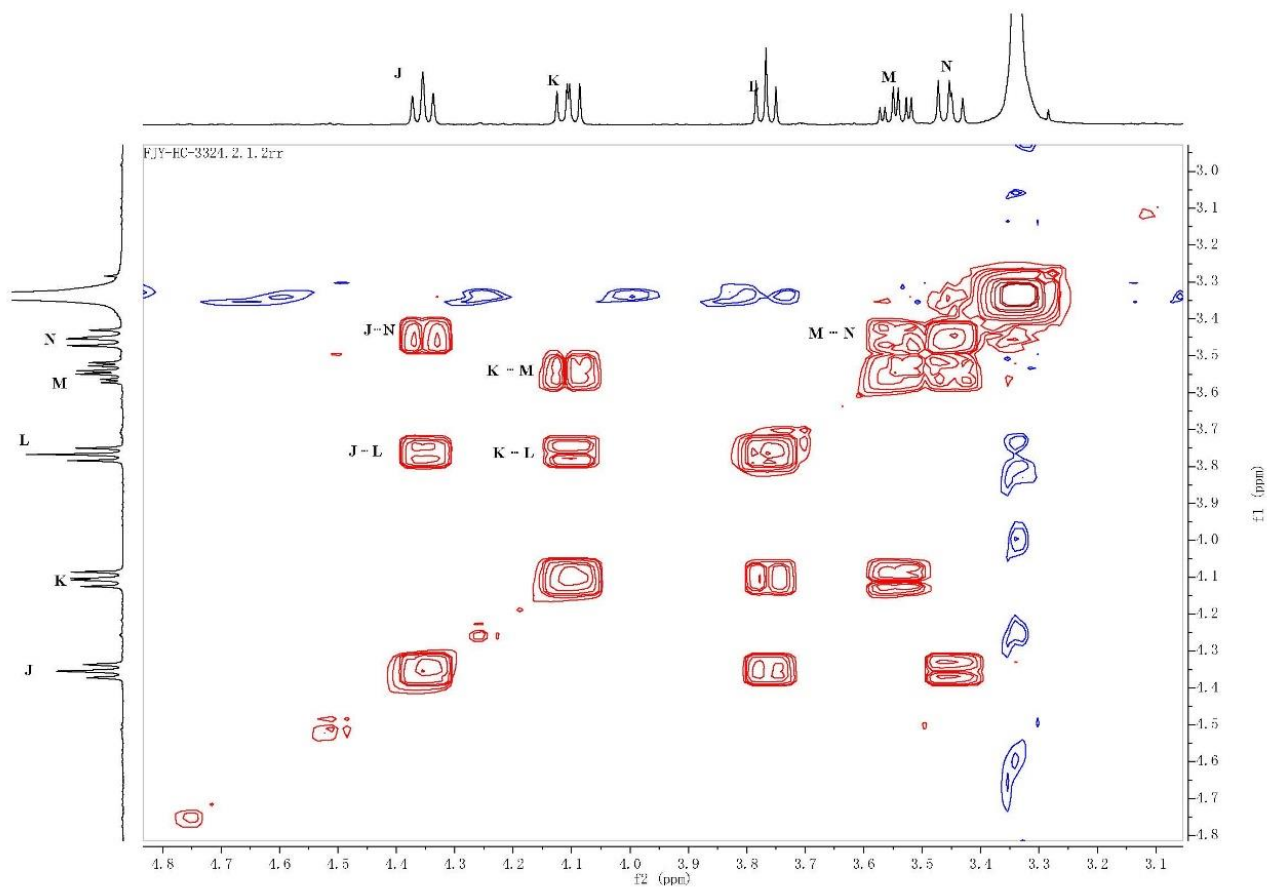

**Figure S1.** COSY spectrum of **3qa** (500 MHz, DMSO-*d*<sub>6</sub>)

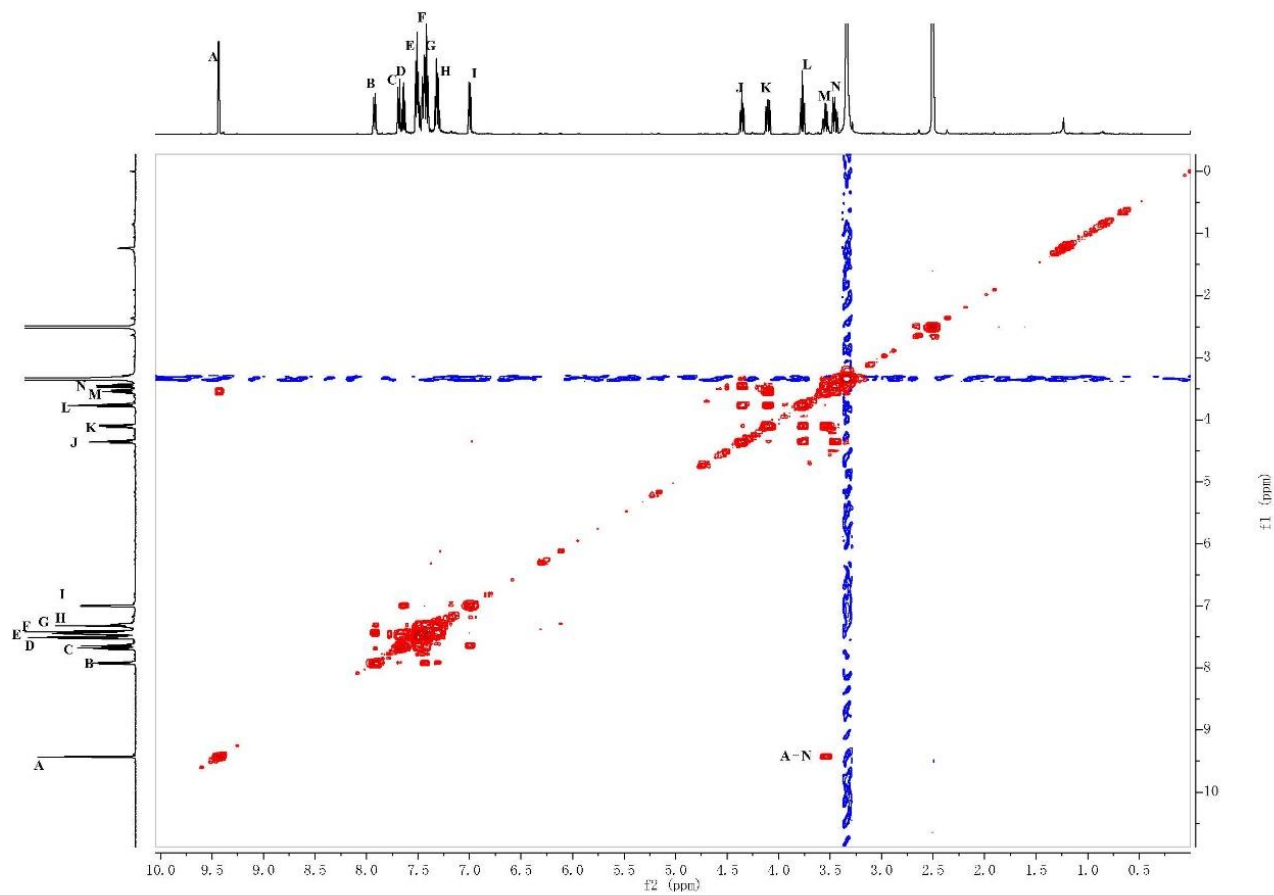

**Figure S2.** COSY spectrum of **3qa** (500 MHz, DMSO-*d*<sub>6</sub>)

**Table S5.** H NMR signal assignment of **3ra**

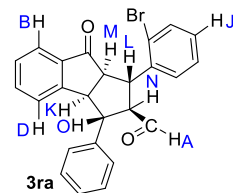

| No.      | $\delta$                         | No.      | $\delta$                          |
|----------|----------------------------------|----------|-----------------------------------|
| <b>A</b> | 9.46 (d, $J = 4.2$ Hz, 1H)       | <b>H</b> | 7.32 (t, $J = 7.3$ Hz, 1H)        |
| <b>B</b> | 7.93 (dd, $J = 7.9, 1.7$ Hz, 1H) | <b>I</b> | 7.23 (td, $J = 7.6, 1.6$ Hz, 1H)  |
| <b>C</b> | 7.69 (d, $J = 7.6$ Hz, 1H)       | <b>J</b> | 7.00 (d, $J = 7.6$ Hz, 1H)        |
| <b>D</b> | 7.66 – 7.60 (m, 2H)              | <b>K</b> | 4.36 (t, $J = 8.9$ Hz, 1H)        |
| <b>E</b> | 7.55 – 7.51 (m, 2H)              | <b>L</b> | 4.09 (dd, $J = 10.9, 8.7$ Hz, 1H) |
| <b>F</b> | 7.50 – 7.44 (m, 2H)              | <b>M</b> | 3.76 (t, $J = 8.5$ Hz, 1H)        |
| <b>G</b> | 7.42 (t, $J = 7.6$ Hz, 2H)       | <b>N</b> | 3.54 (td, $J = 11.2, 4.3$ Hz, 1H) |
|          |                                  | <b>O</b> | 3.46 (dd, $J = 11.6, 9.3$ Hz, 1H) |



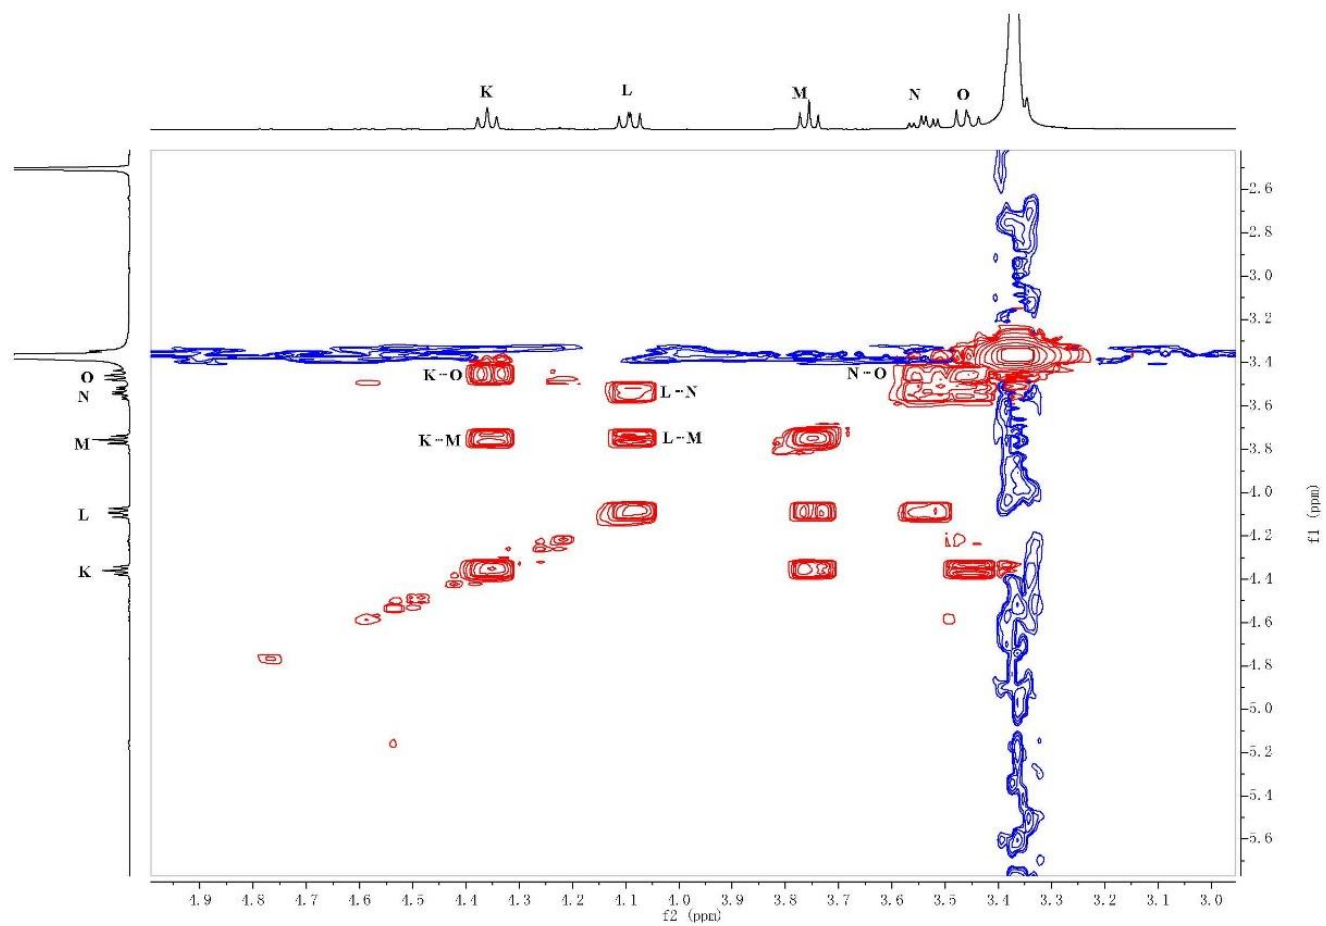

**Figure S3.** COSY spectrum of **3ra** (500 MHz, DMSO-*d*<sub>6</sub>)

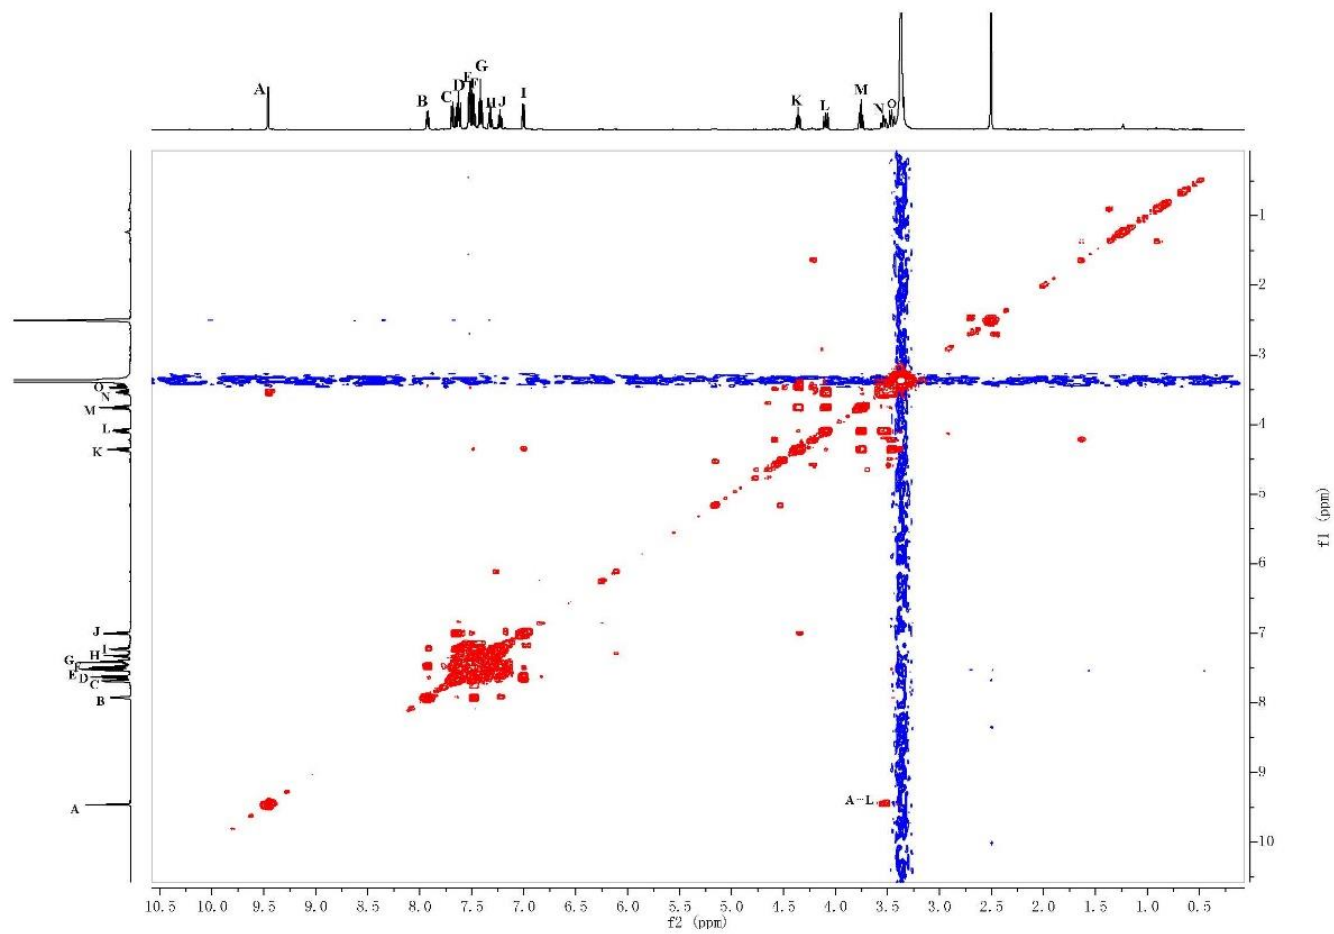

**Figure S4.** COSY spectrum of **3ra** (500 MHz, DMSO-*d*<sub>6</sub>)

**Table S6.** <sup>1</sup>H NMR signal assignment of **5n**

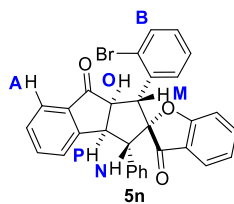

| No.      | $\delta$                         | No.      | $\delta$                          |
|----------|----------------------------------|----------|-----------------------------------|
| <b>A</b> | 7.84 (dd, $J = 8.1, 1.7$ Hz, 1H) | <b>I</b> | 7.20 – 7.13 (m, 1H)               |
| <b>B</b> | 7.74 (d, $J = 7.6$ Hz, 1H)       | <b>J</b> | 7.11 – 7.01 (m, 2H)               |
| <b>C</b> | 7.63 (td, $J = 7.5, 1.3$ Hz, 1H) | <b>K</b> | 6.93 (d, $J = 7.7$ Hz, 1H)        |
| <b>D</b> | 7.54 (d, $J = 7.5$ Hz, 1H)       | <b>L</b> | 6.84 (t, $J = 7.4$ Hz, 1H)        |
| <b>E</b> | 7.52 – 7.46 (m, 1H)              | <b>M</b> | 4.83 (dd, $J = 10.8, 8.4$ Hz, 1H) |
| <b>F</b> | 7.44 (dd, $J = 8.0, 1.3$ Hz, 1H) | <b>N</b> | 4.53 (d, $J = 9.6$ Hz, 1H)        |
| <b>G</b> | 7.39 – 7.36 (m, 2H)              | <b>O</b> | 4.02 (t, $J = 9.0$ Hz, 1H)        |
| <b>H</b> | 7.33 – 7.21 (m, 4H)              | <b>P</b> | 3.53 (d, $J = 10.8$ Hz, 1H)       |

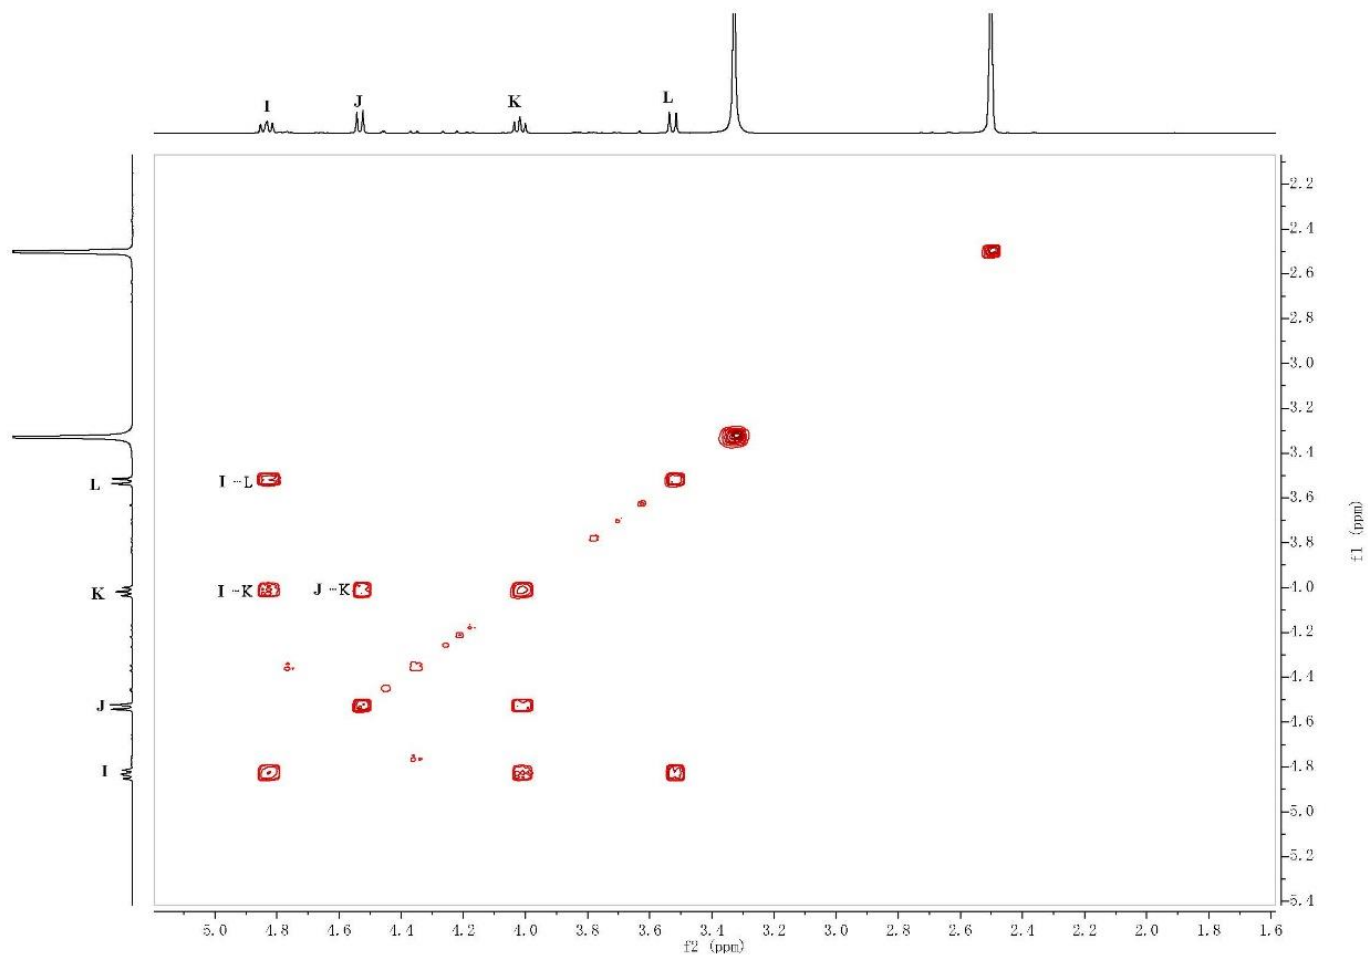

**Figure S5.** COSY spectrum of **5n** (500 MHz, DMSO- $d_6$ )

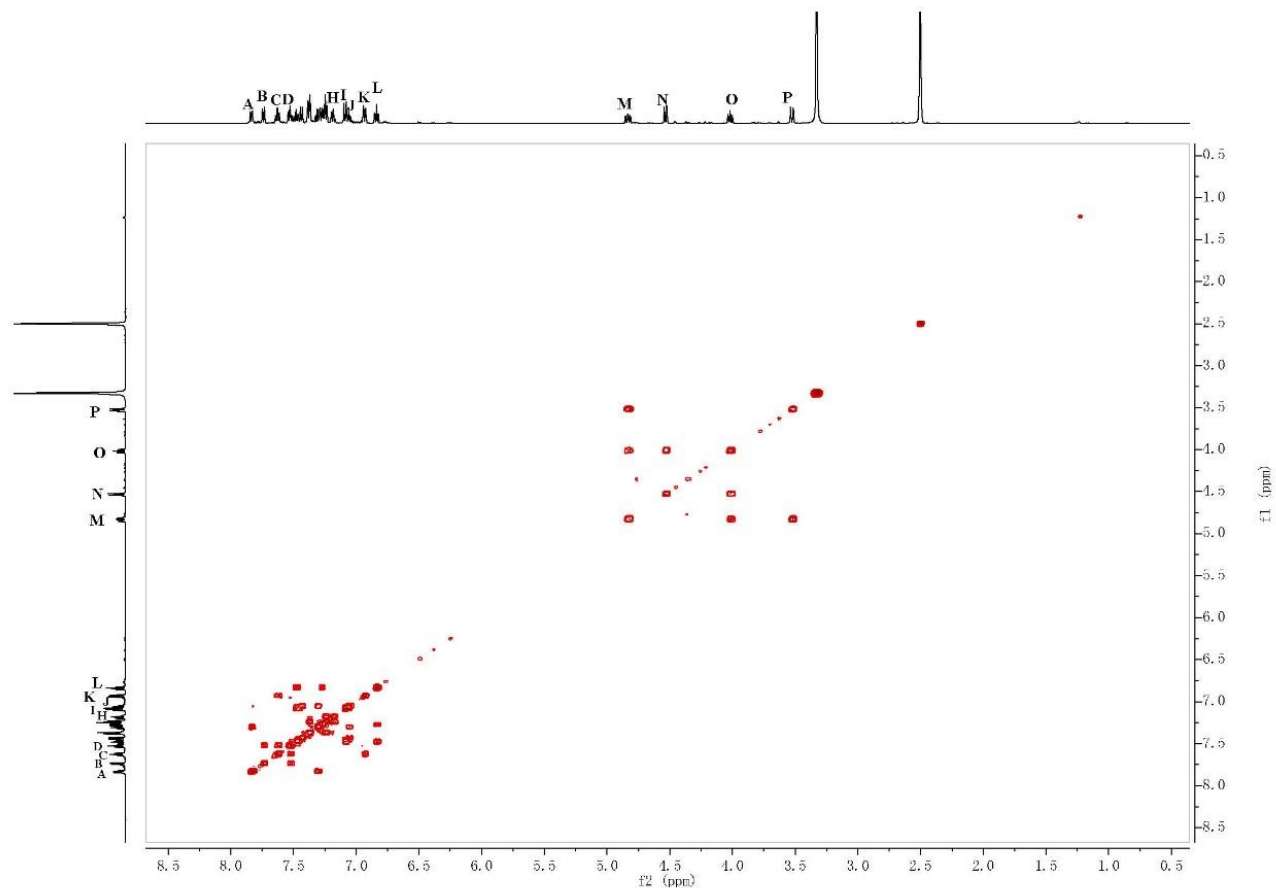

**Figure S6.** COSY spectrum of **5n** (500 MHz, DMSO- $d_6$ )

### 13. NMR spectra

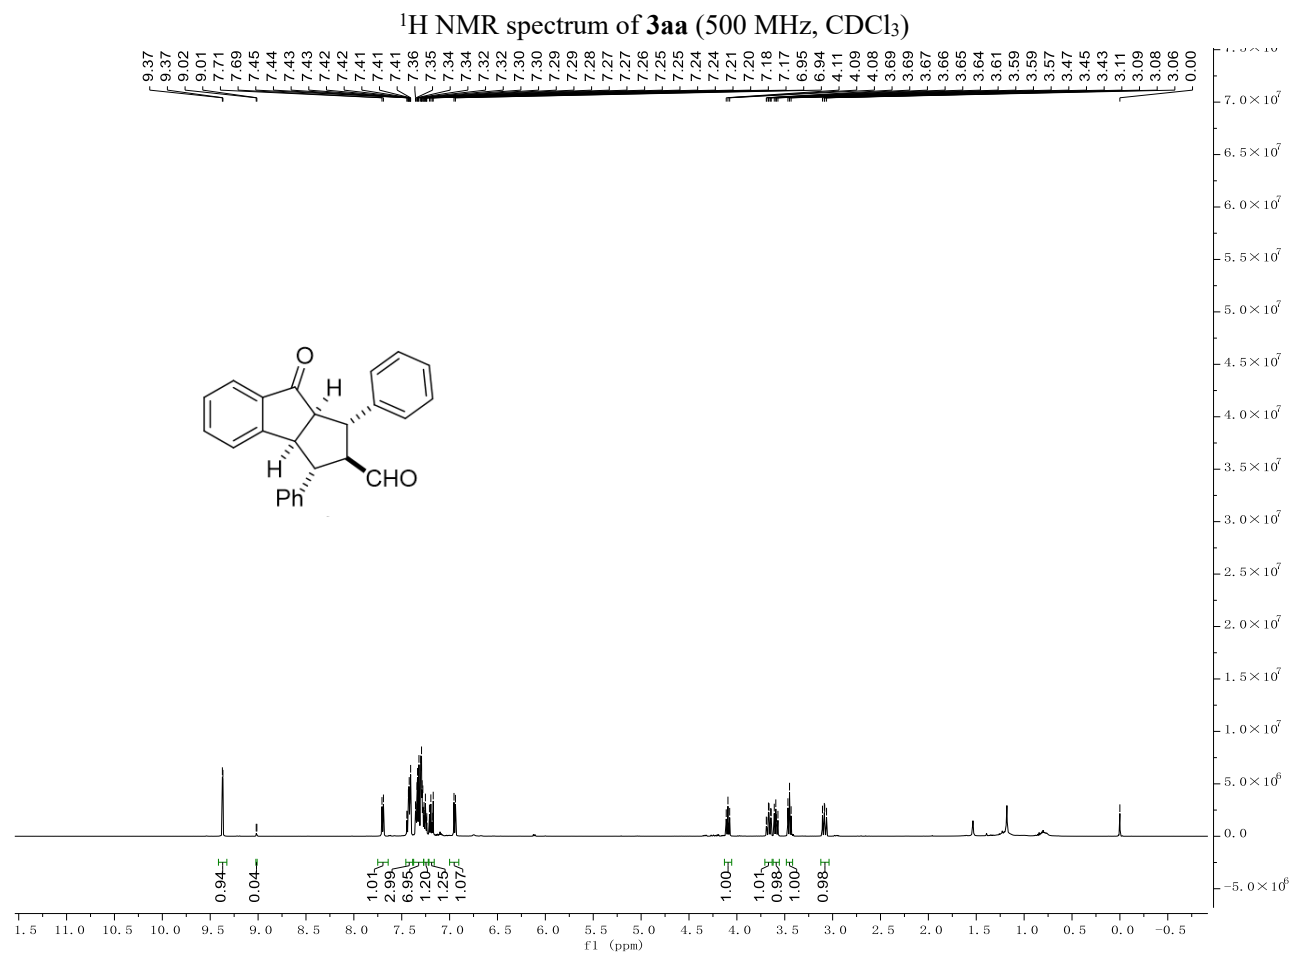

<sup>13</sup>C NMR spectrum of **3aa** (125 MHz, CDCl<sub>3</sub>)

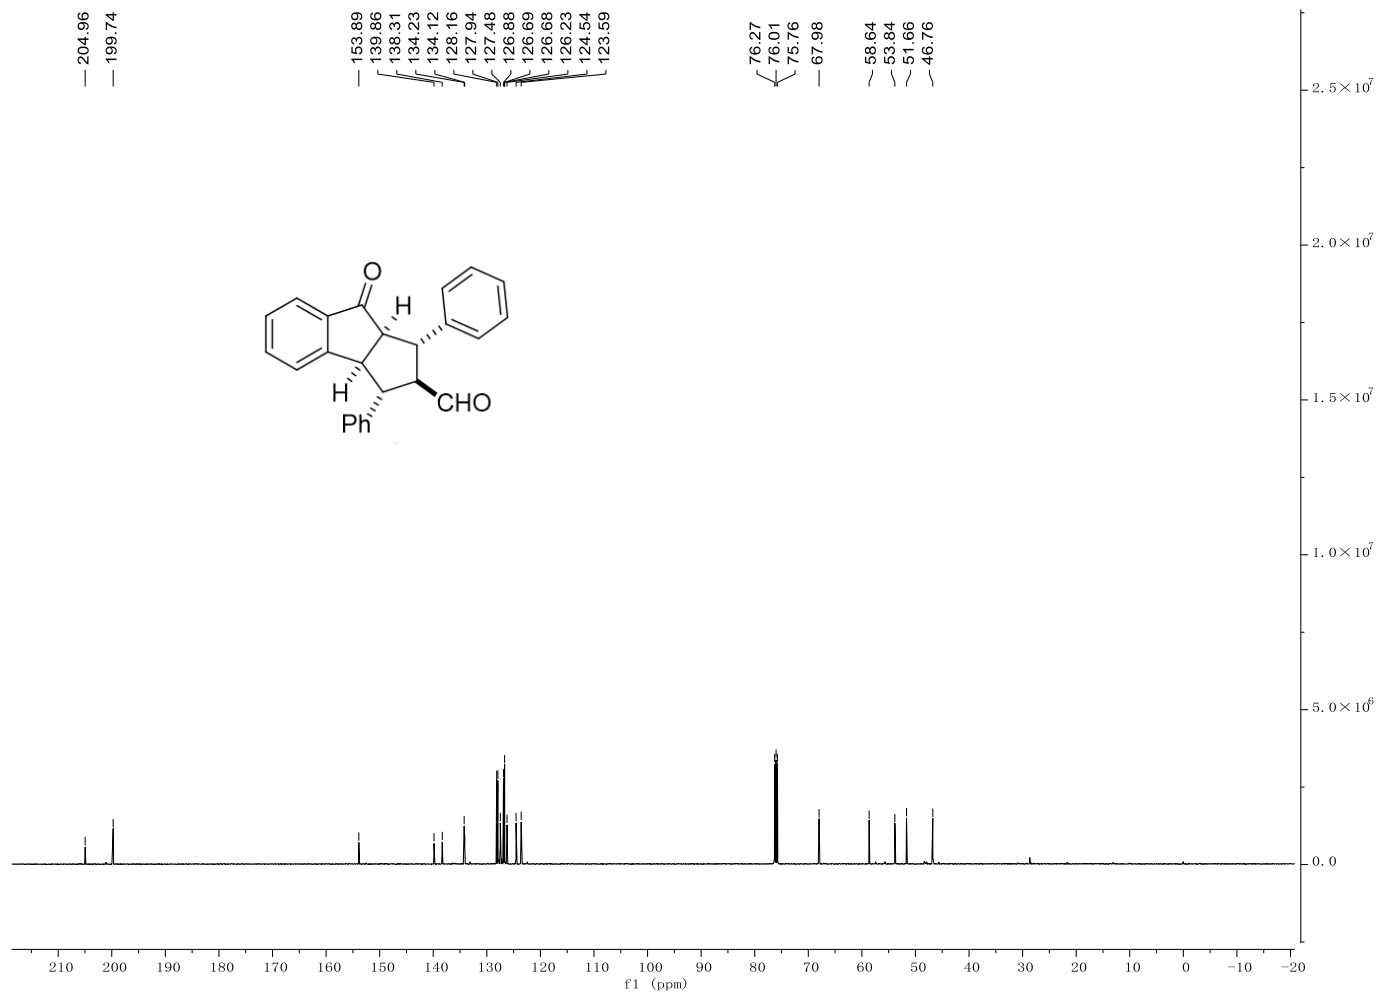

<sup>1</sup>H NMR spectrum of **3ba** (500 MHz, CDCl<sub>3</sub>)

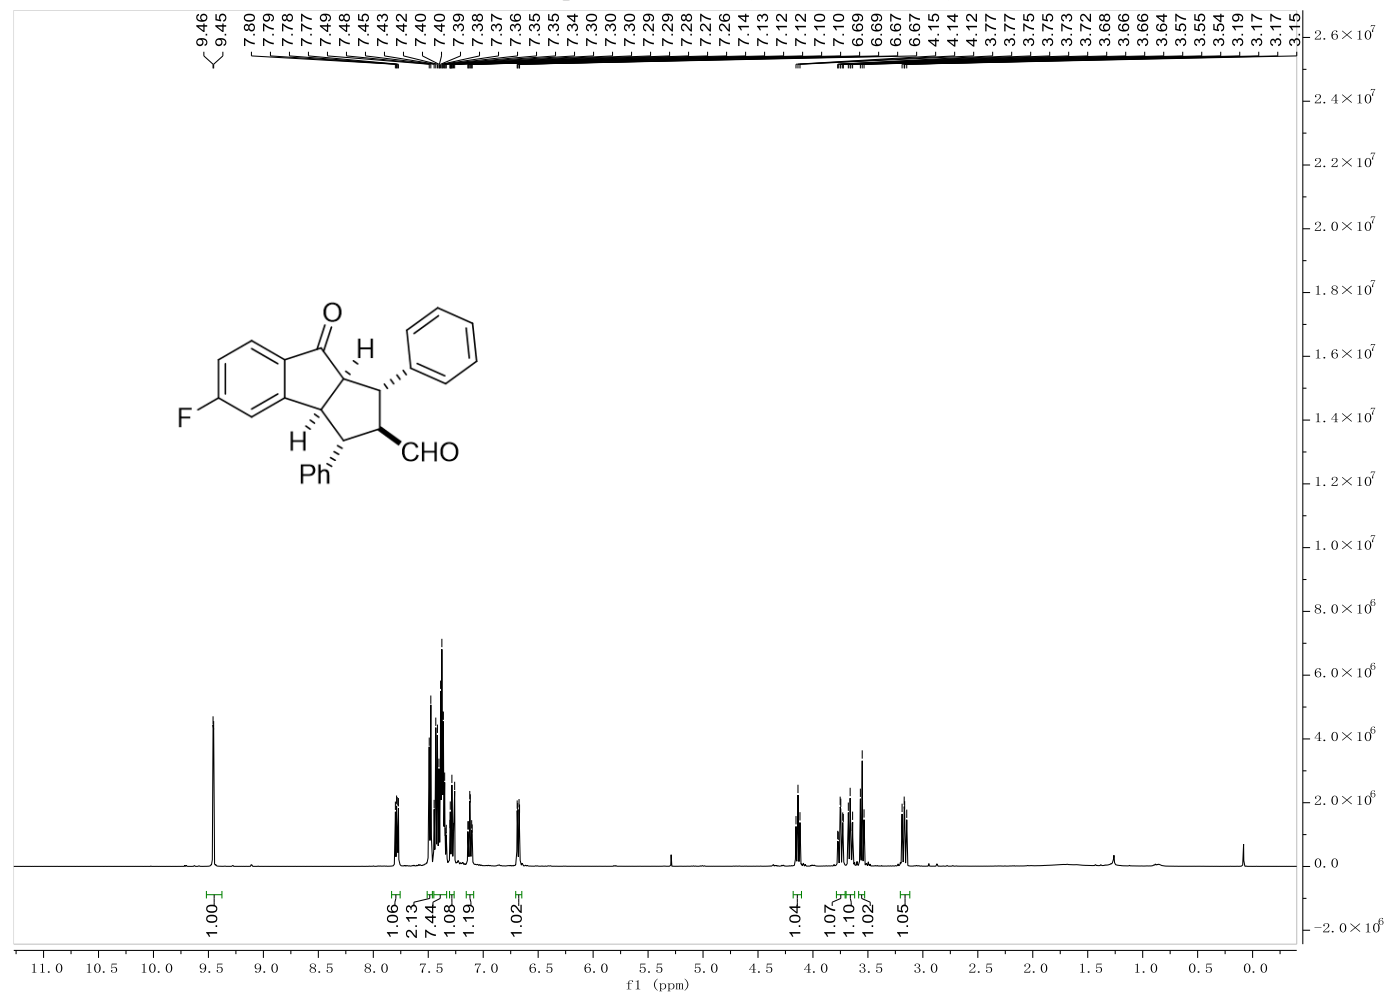



<sup>13</sup>C NMR spectrum of **3ba** (125 MHz, CDCl<sub>3</sub>)

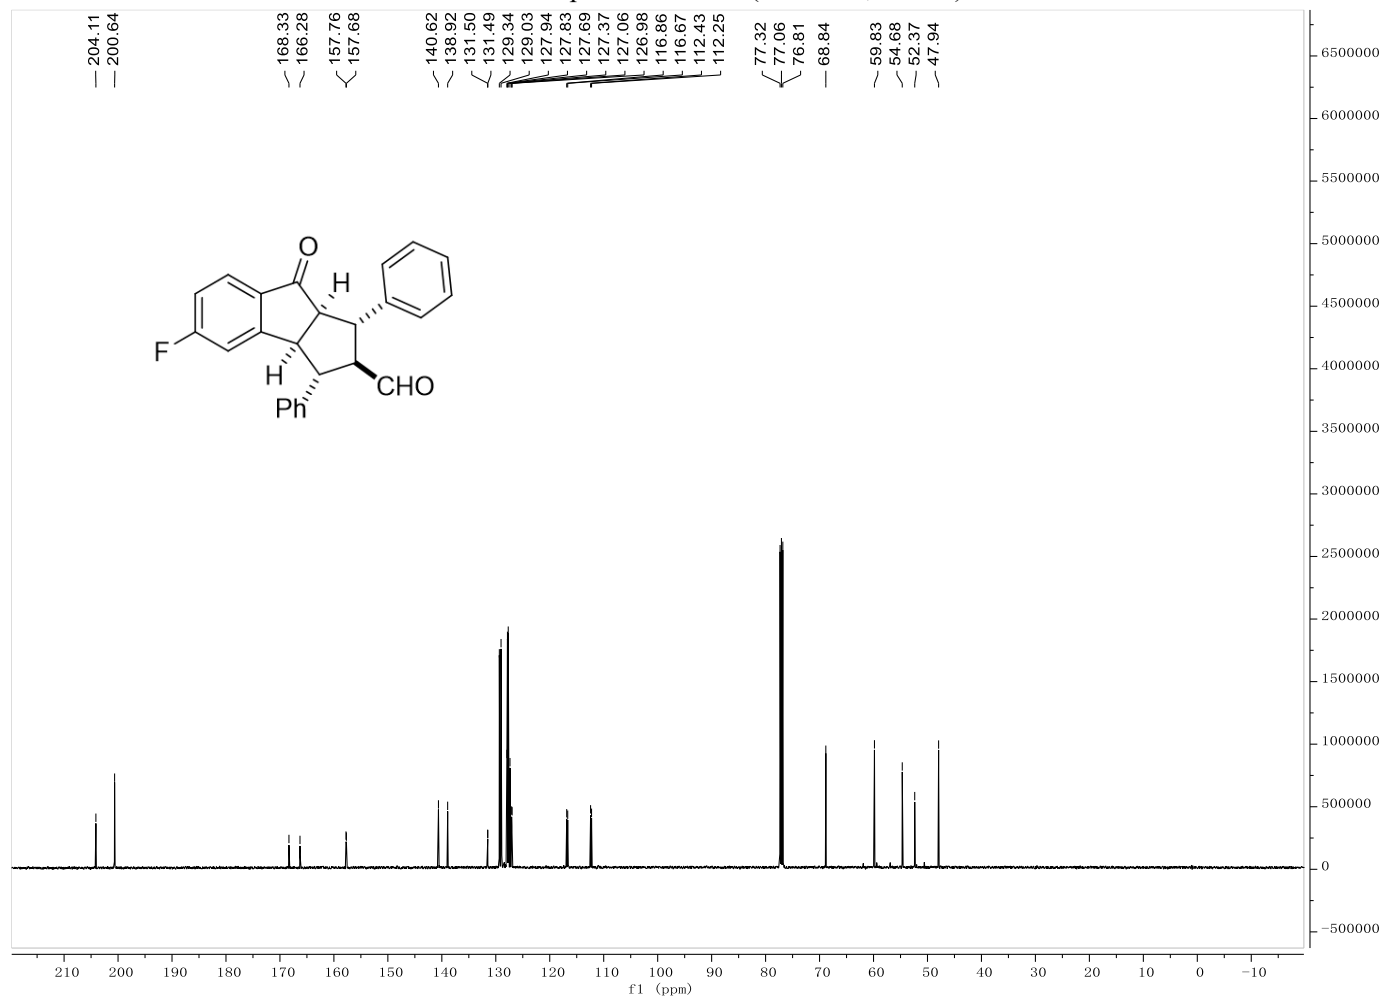

<sup>1</sup>H NMR spectrum of **3a** (400 MHz, CDCl<sub>3</sub>)

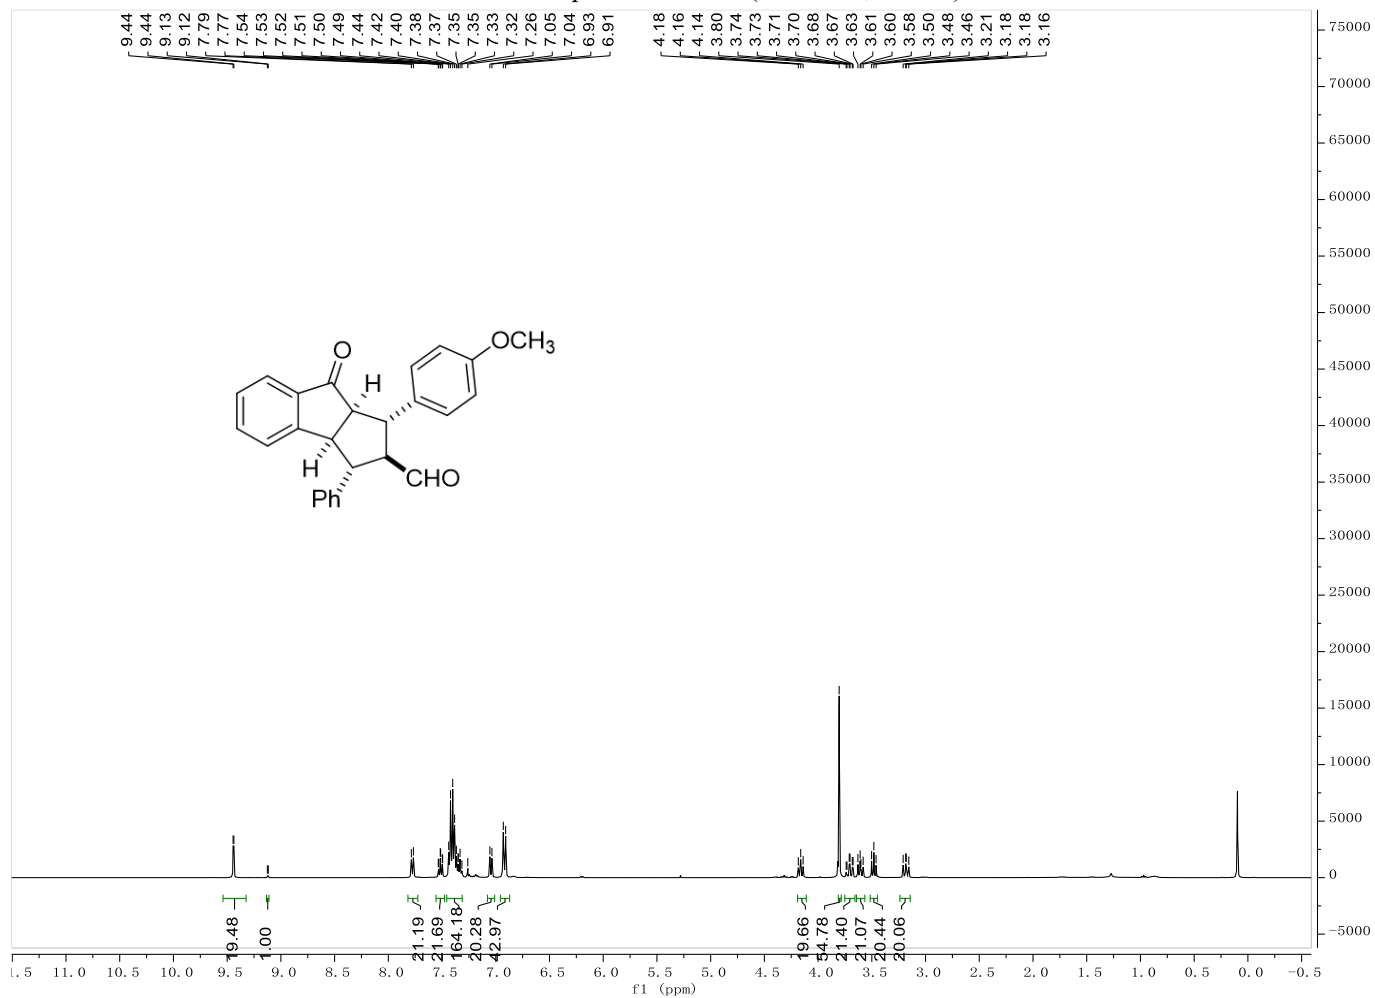

<sup>13</sup>C NMR spectrum of **3ca** (100 MHz, CDCl<sub>3</sub>)

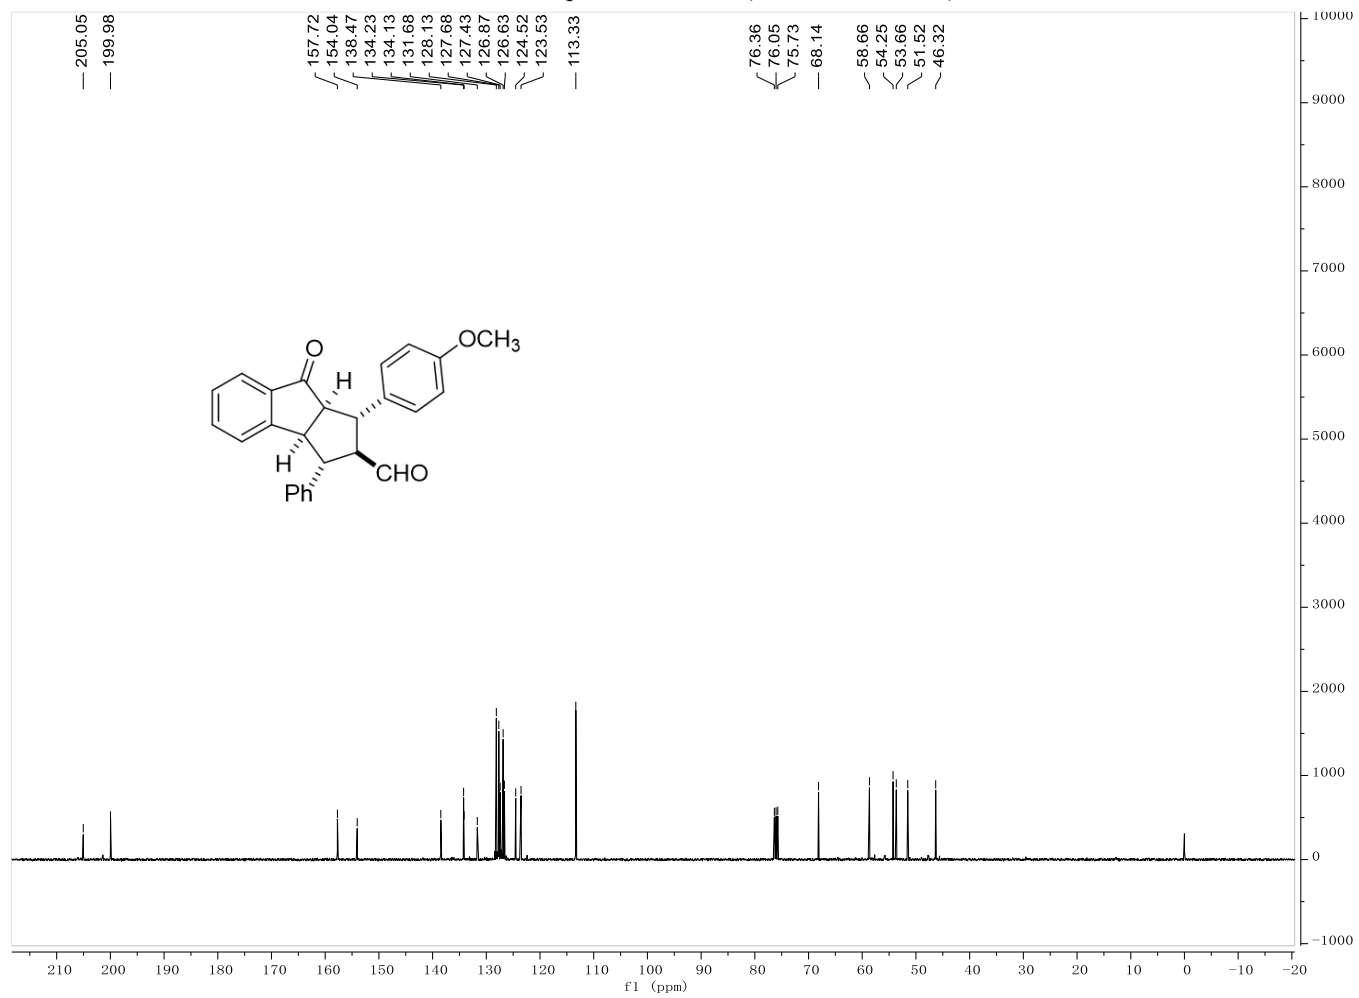

<sup>1</sup>H NMR spectrum of **3da** (400 MHz, CDCl<sub>3</sub>)

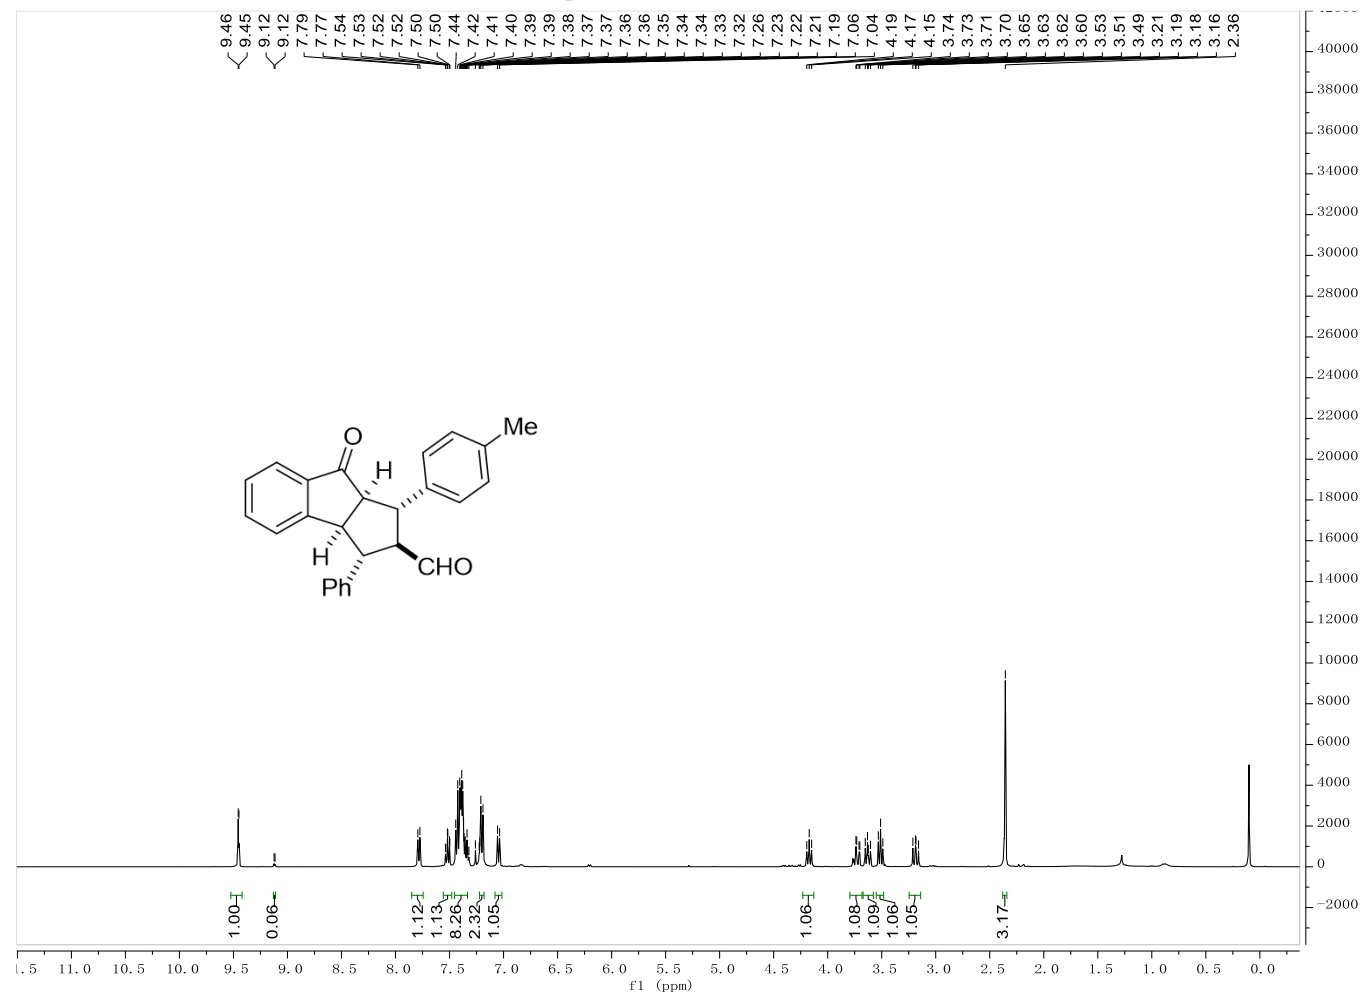

<sup>13</sup>C NMR spectrum of **3da** (100 MHz, CDCl<sub>3</sub>)

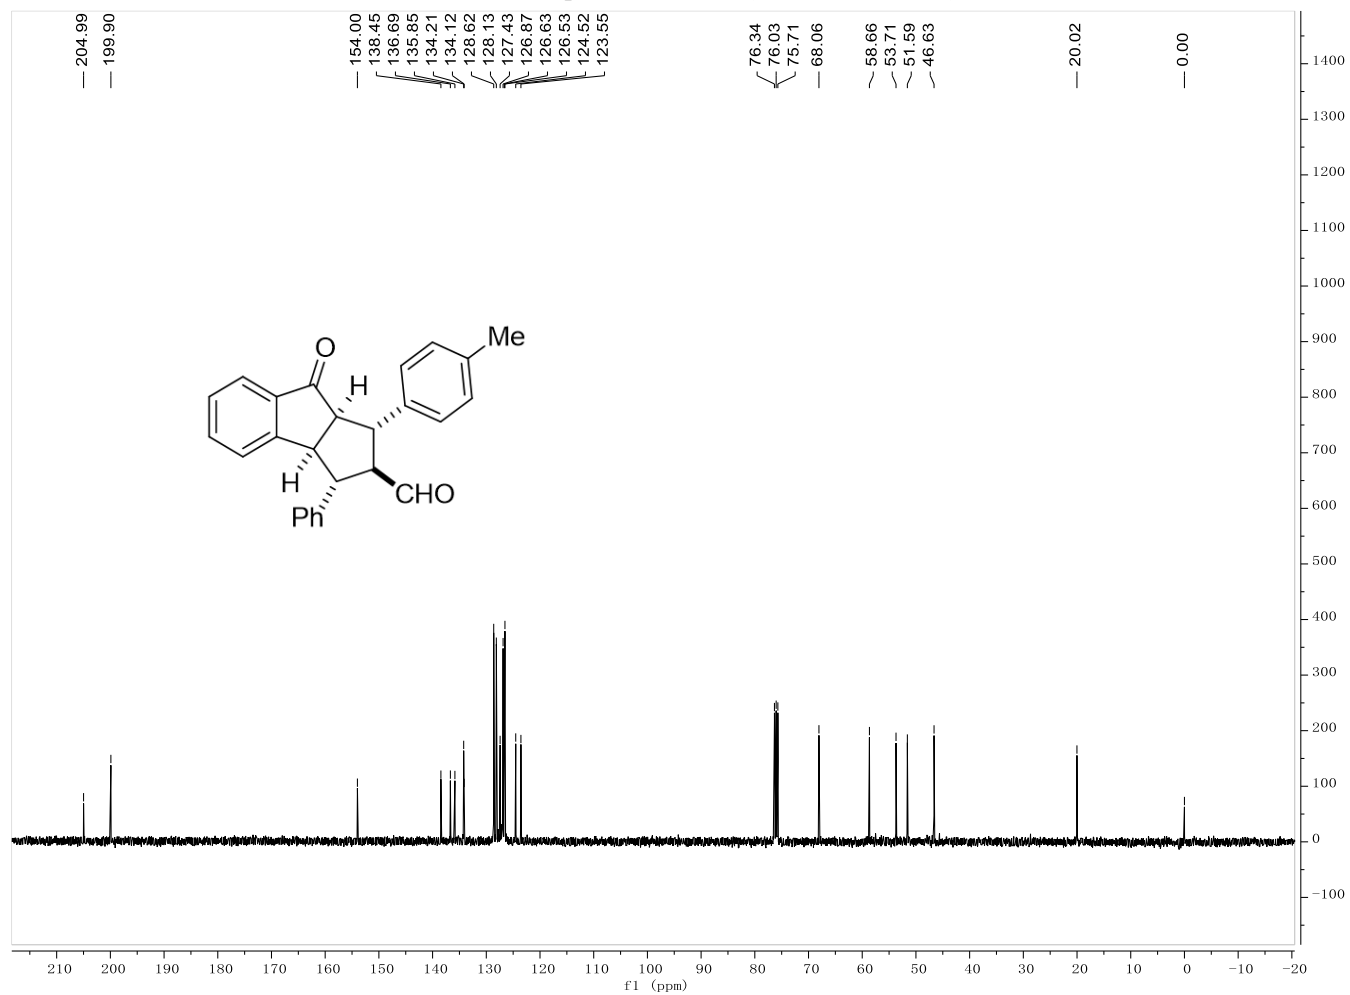

<sup>1</sup>H NMR spectrum of **3ea** (400 MHz, CDCl<sub>3</sub>)

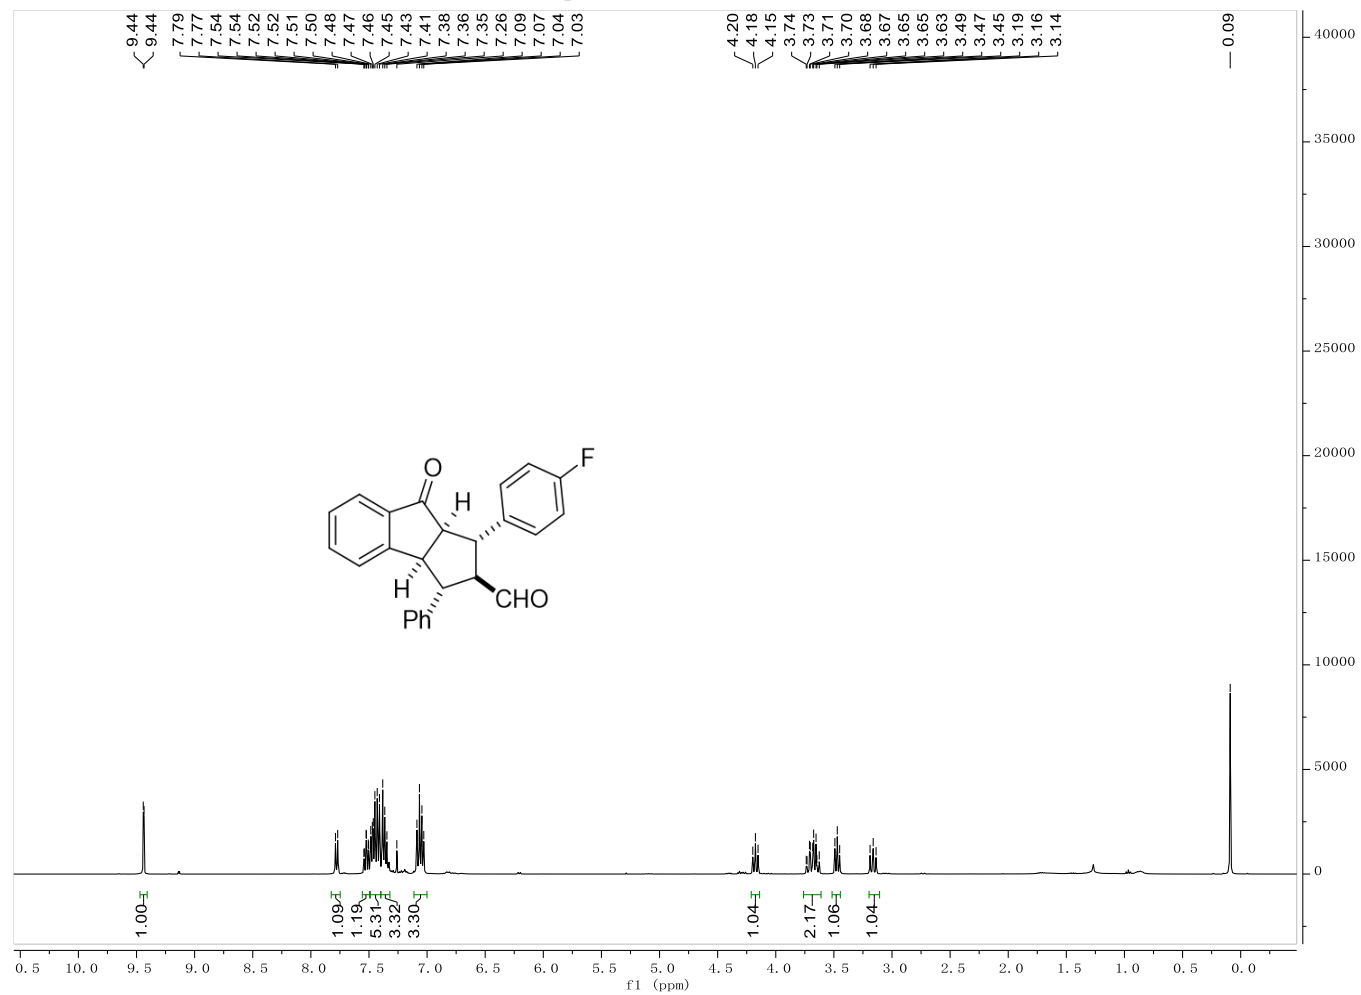

<sup>13</sup>C NMR spectrum of 3ea (125 MHz, DMSO-d<sub>6</sub>)

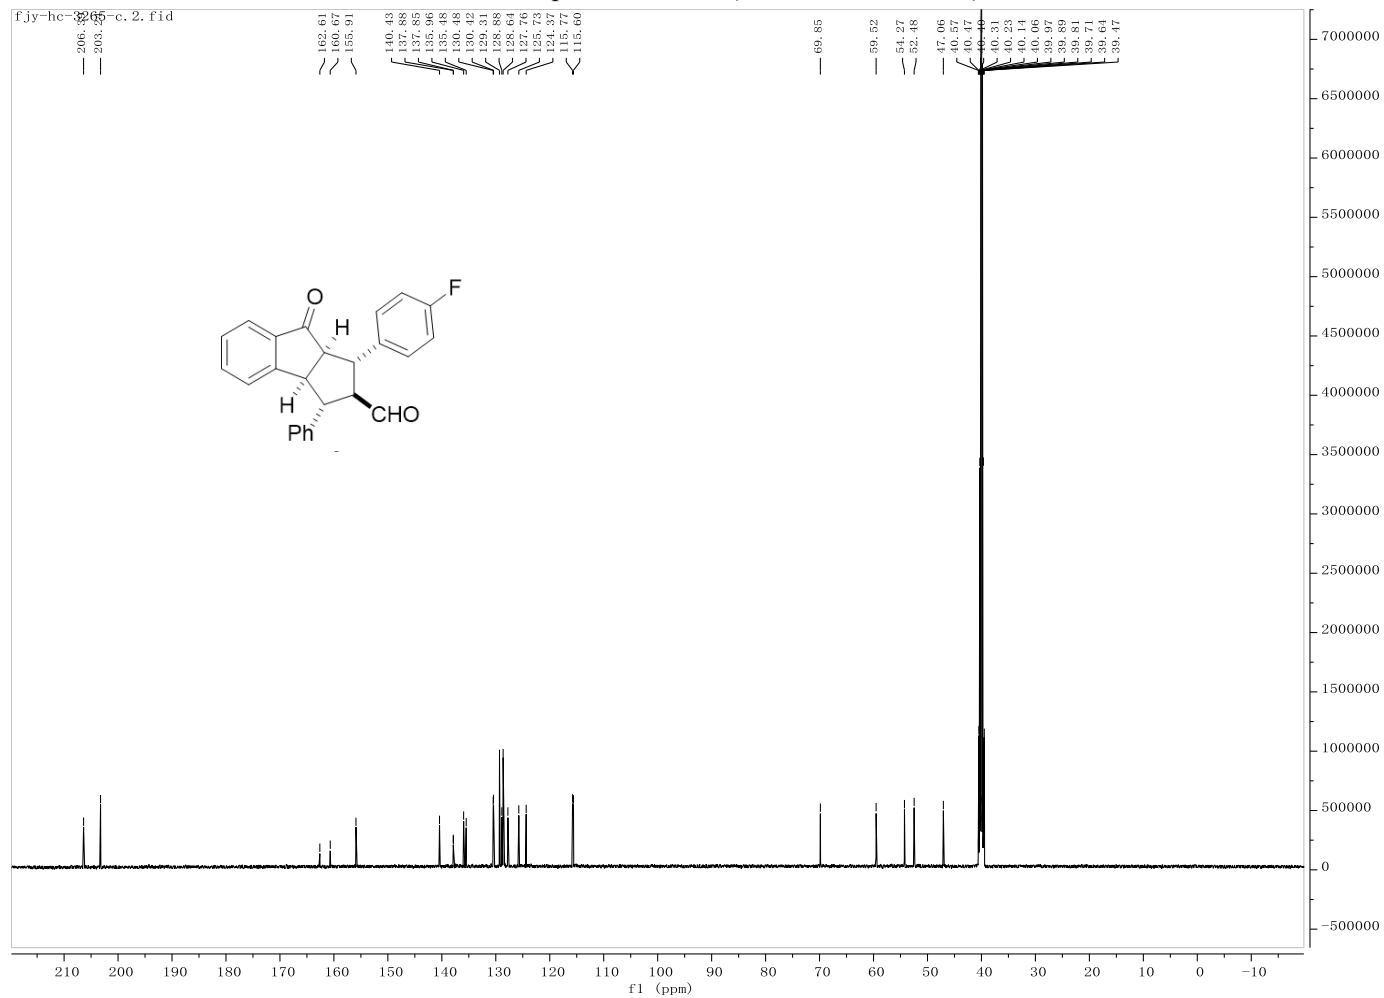

<sup>1</sup>H NMR spectrum of **3fa** (400 MHz, CDCl<sub>3</sub>)

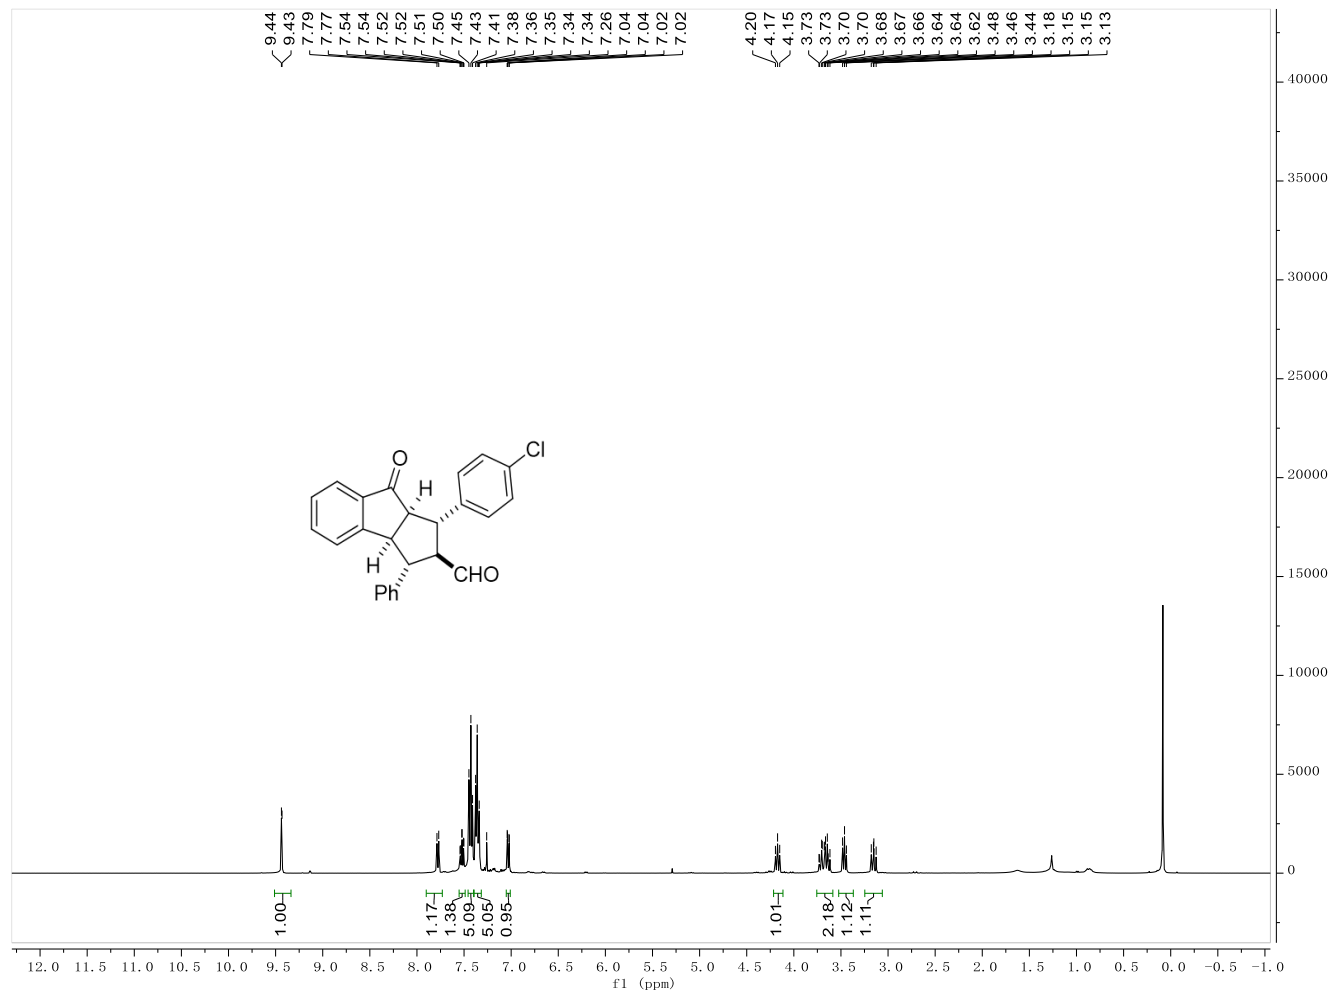



<sup>13</sup>C NMR spectrum of **3fa** (125 MHz, DMSO-*d*<sub>6</sub>)

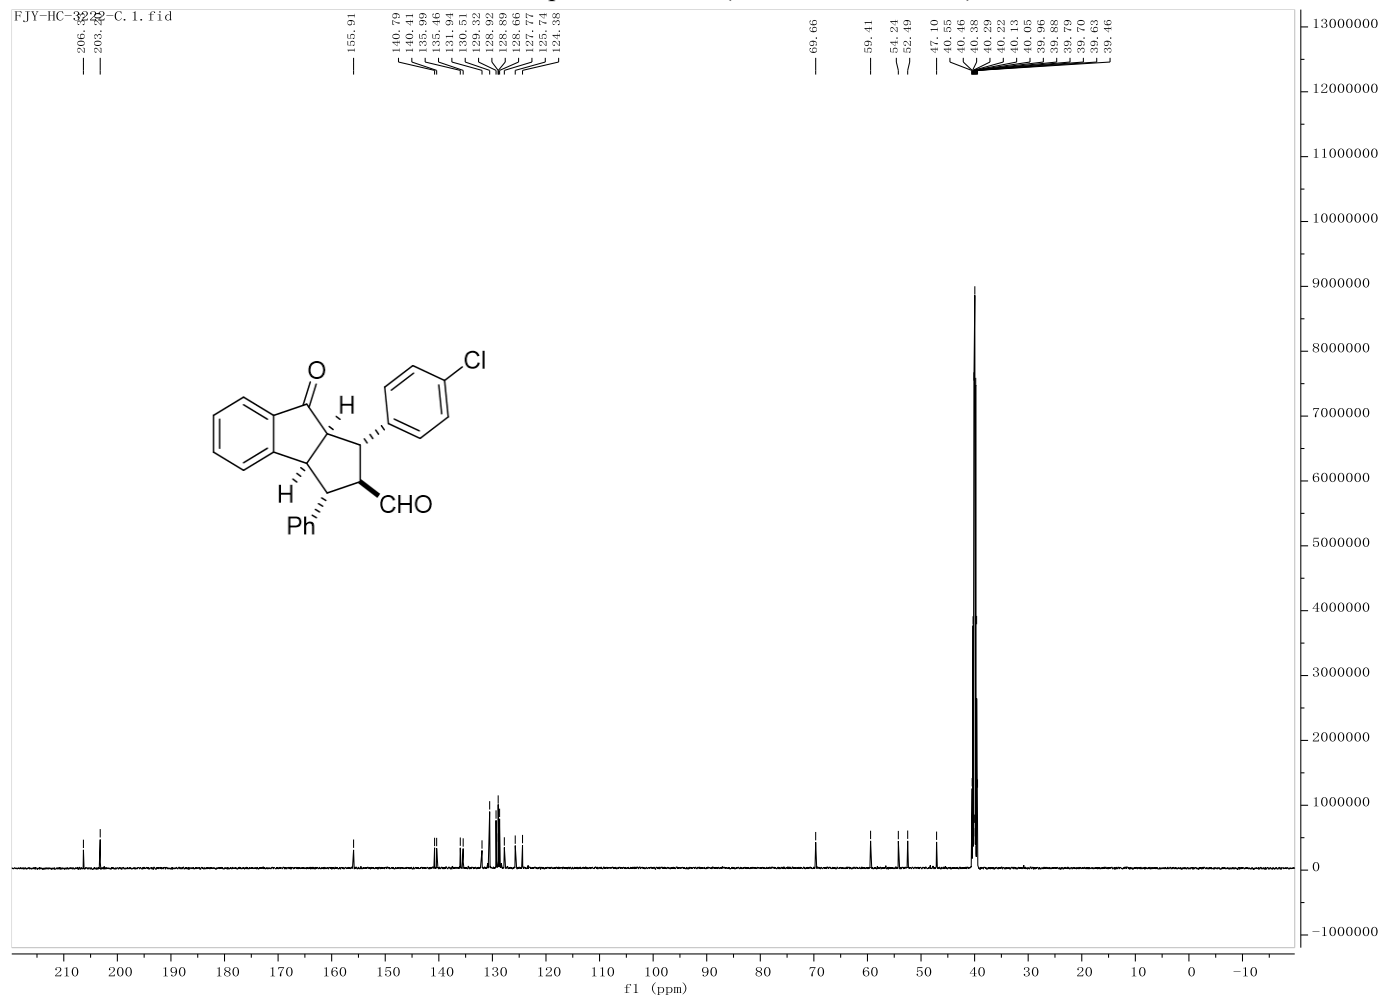

<sup>1</sup>H NMR spectrum of **3ga** (400 MHz, CDCl<sub>3</sub>)

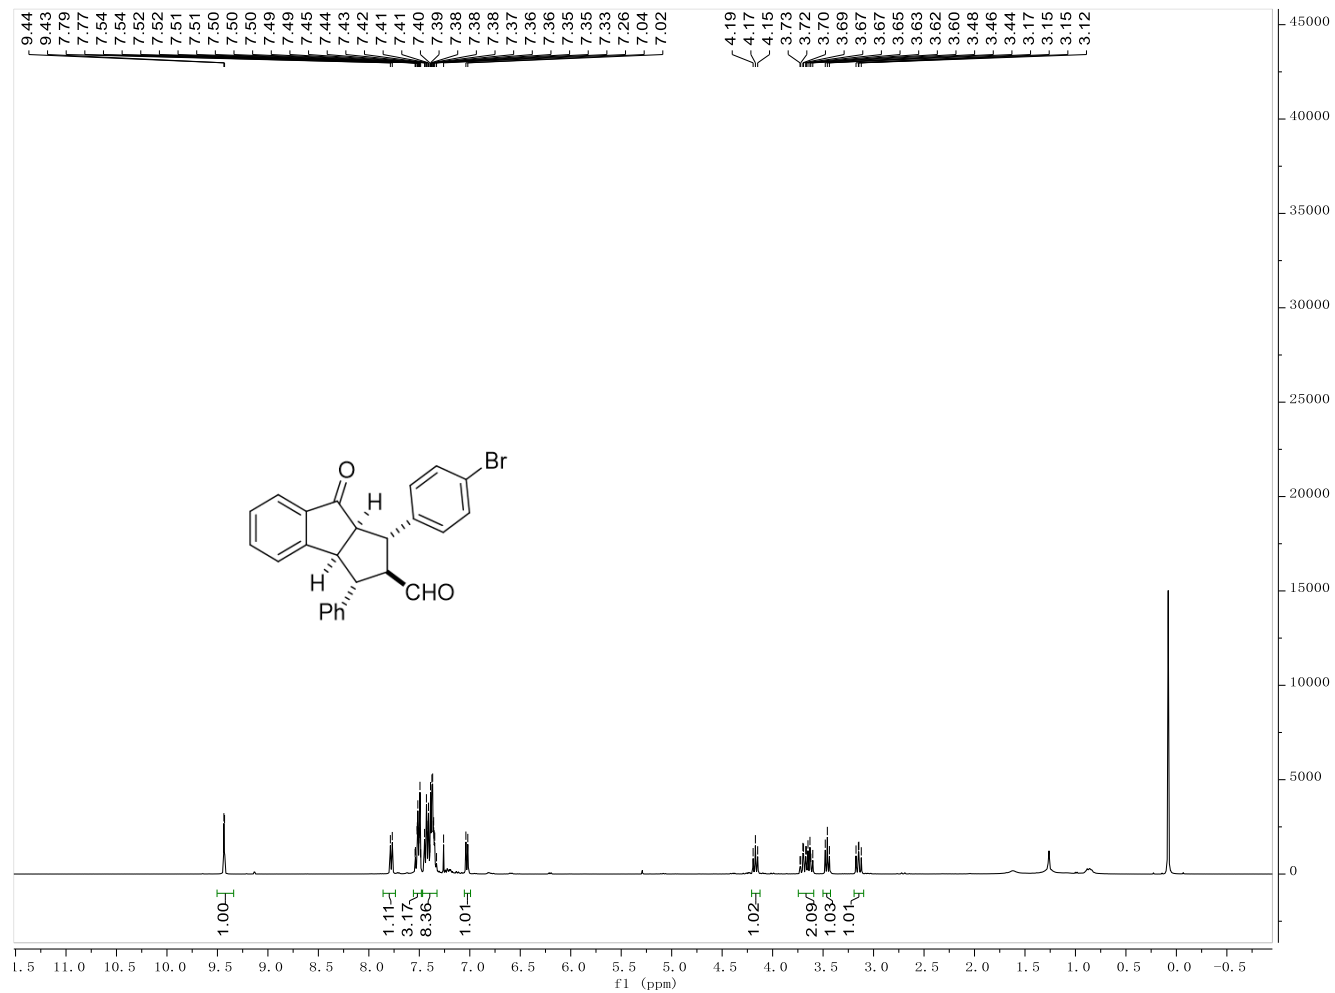

<sup>13</sup>C NMR spectrum of **3ga** (100 MHz, CDCl<sub>3</sub>)

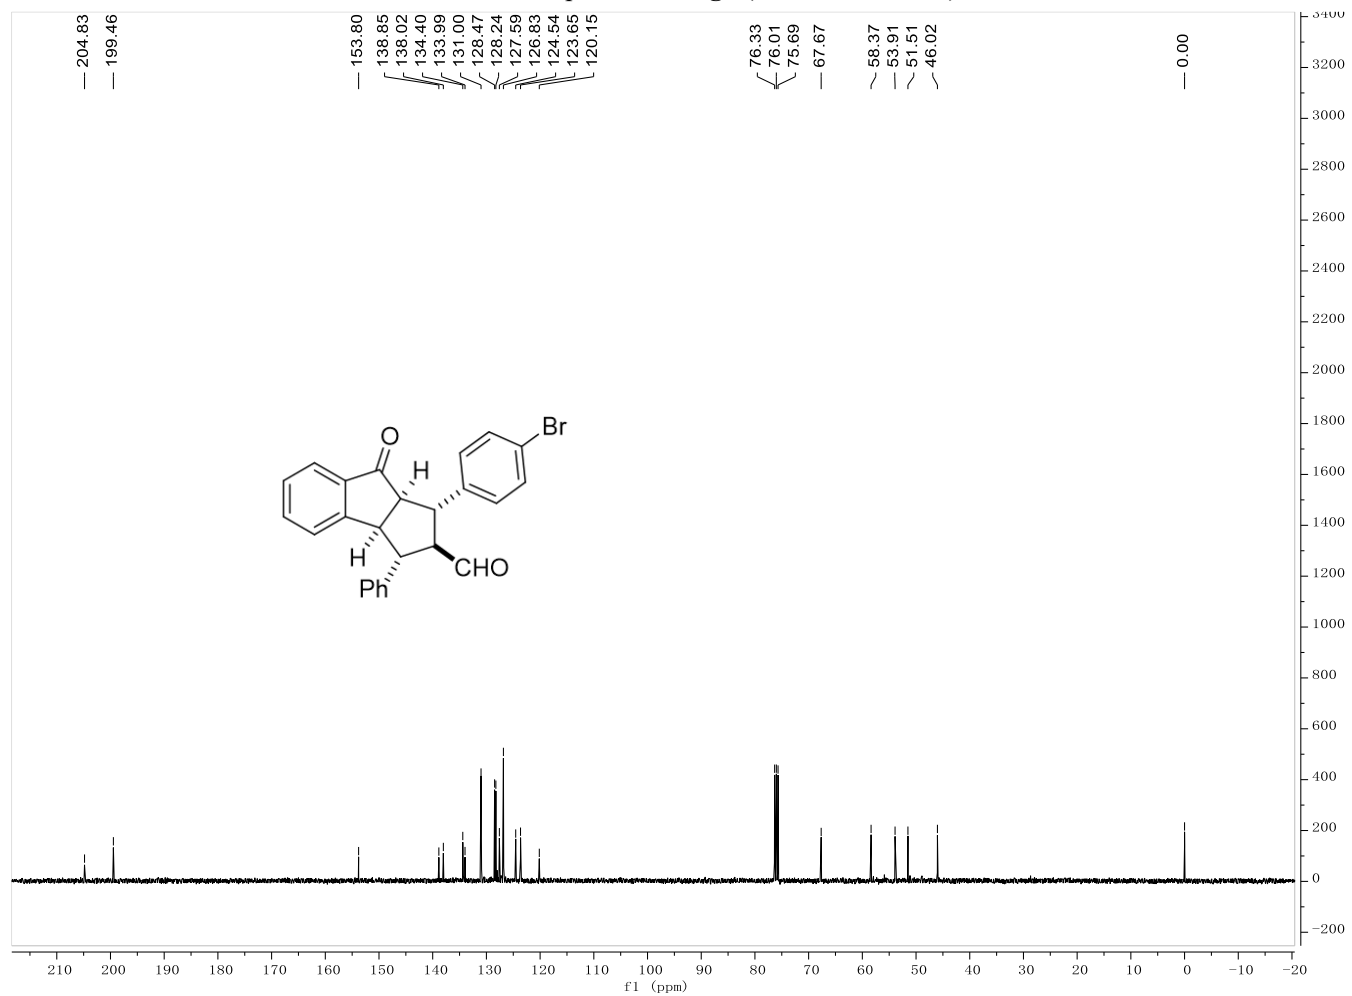

<sup>1</sup>H NMR spectrum of **3ha** (400 MHz, CDCl<sub>3</sub>)

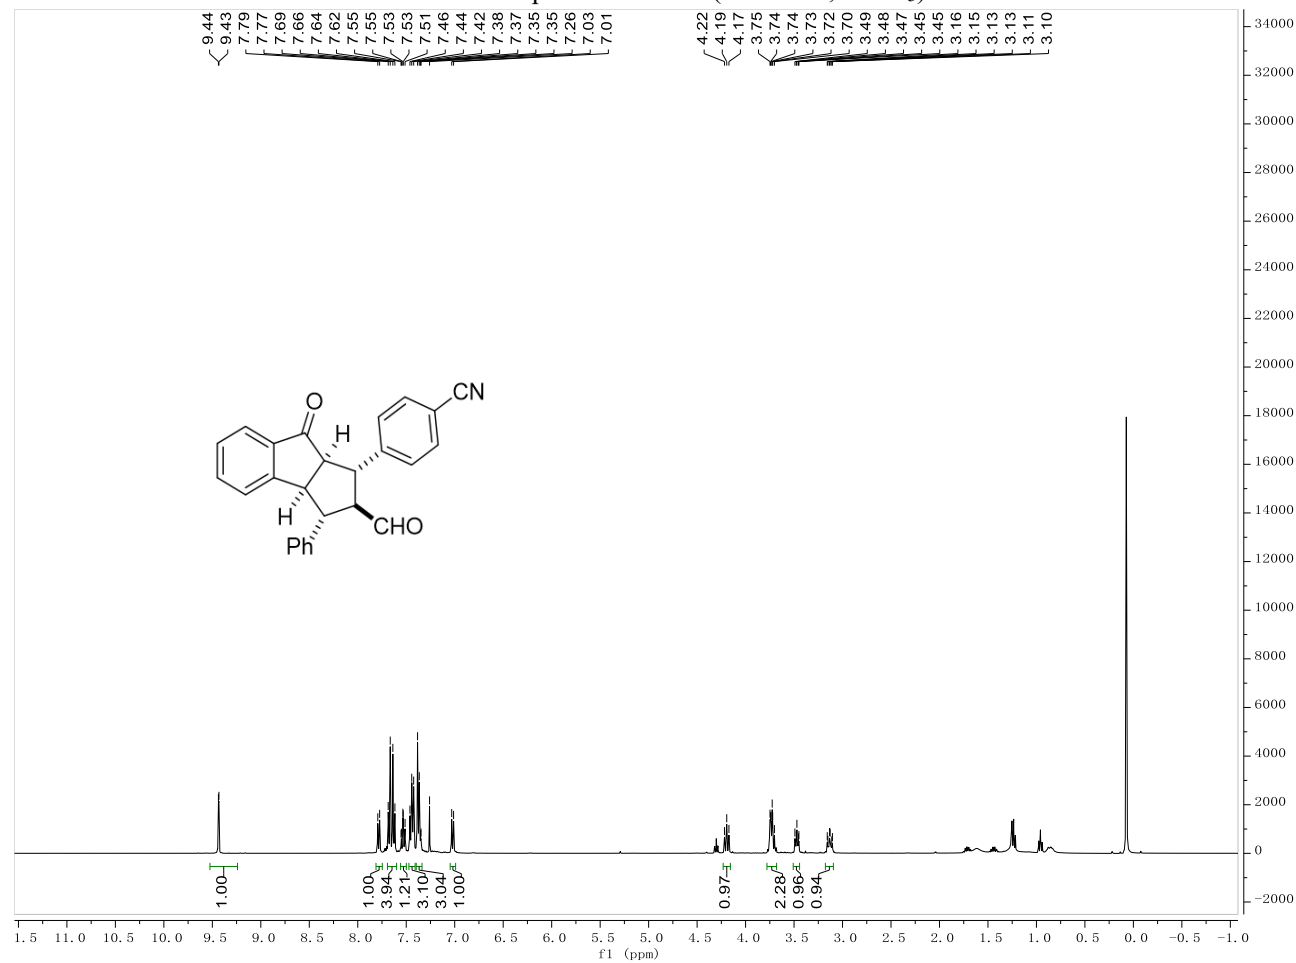

<sup>13</sup>C NMR spectrum of **3ha** (100 MHz, CDCl<sub>3</sub>)

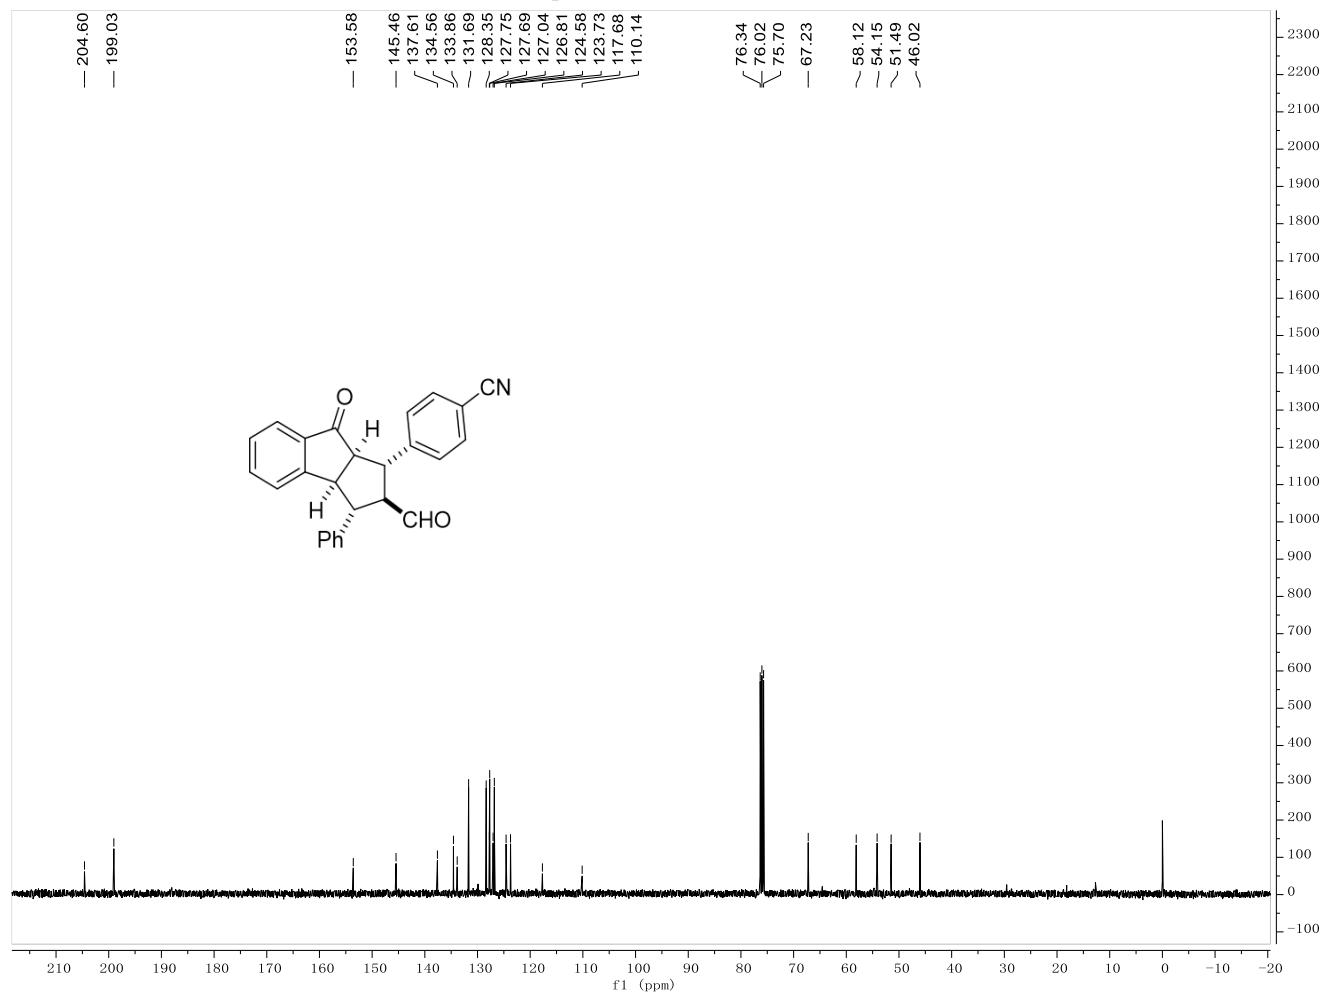

<sup>1</sup>H NMR spectrum of **3ia** (400 MHz, CDCl<sub>3</sub>)

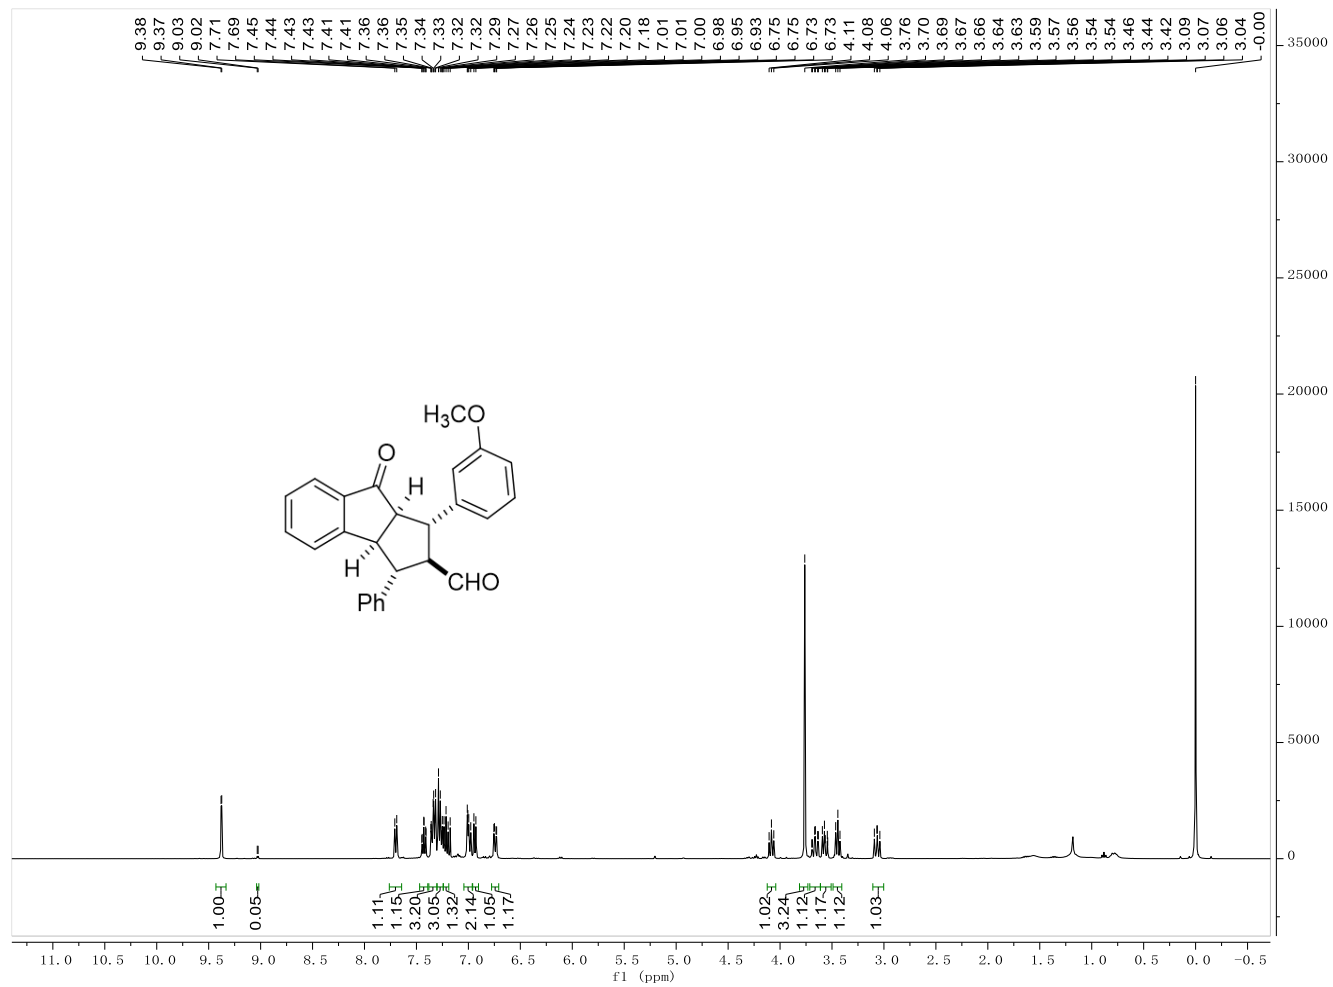

<sup>13</sup>C NMR spectrum of **3ia** (100 MHz, CDCl<sub>3</sub>)

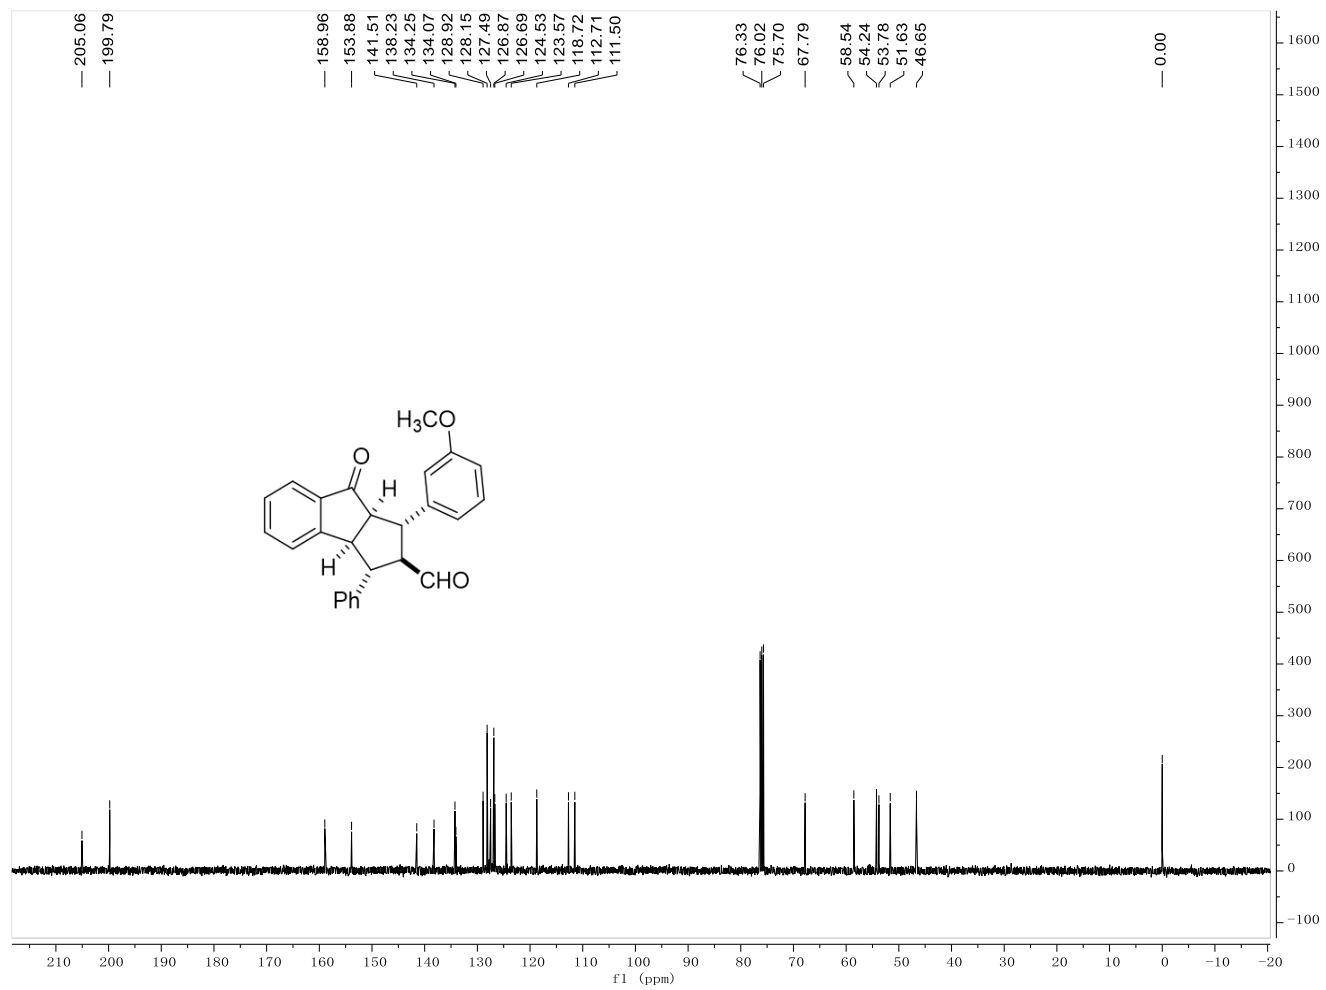

<sup>1</sup>H NMR spectrum of **3ja** (500 MHz, CDCl<sub>3</sub>)

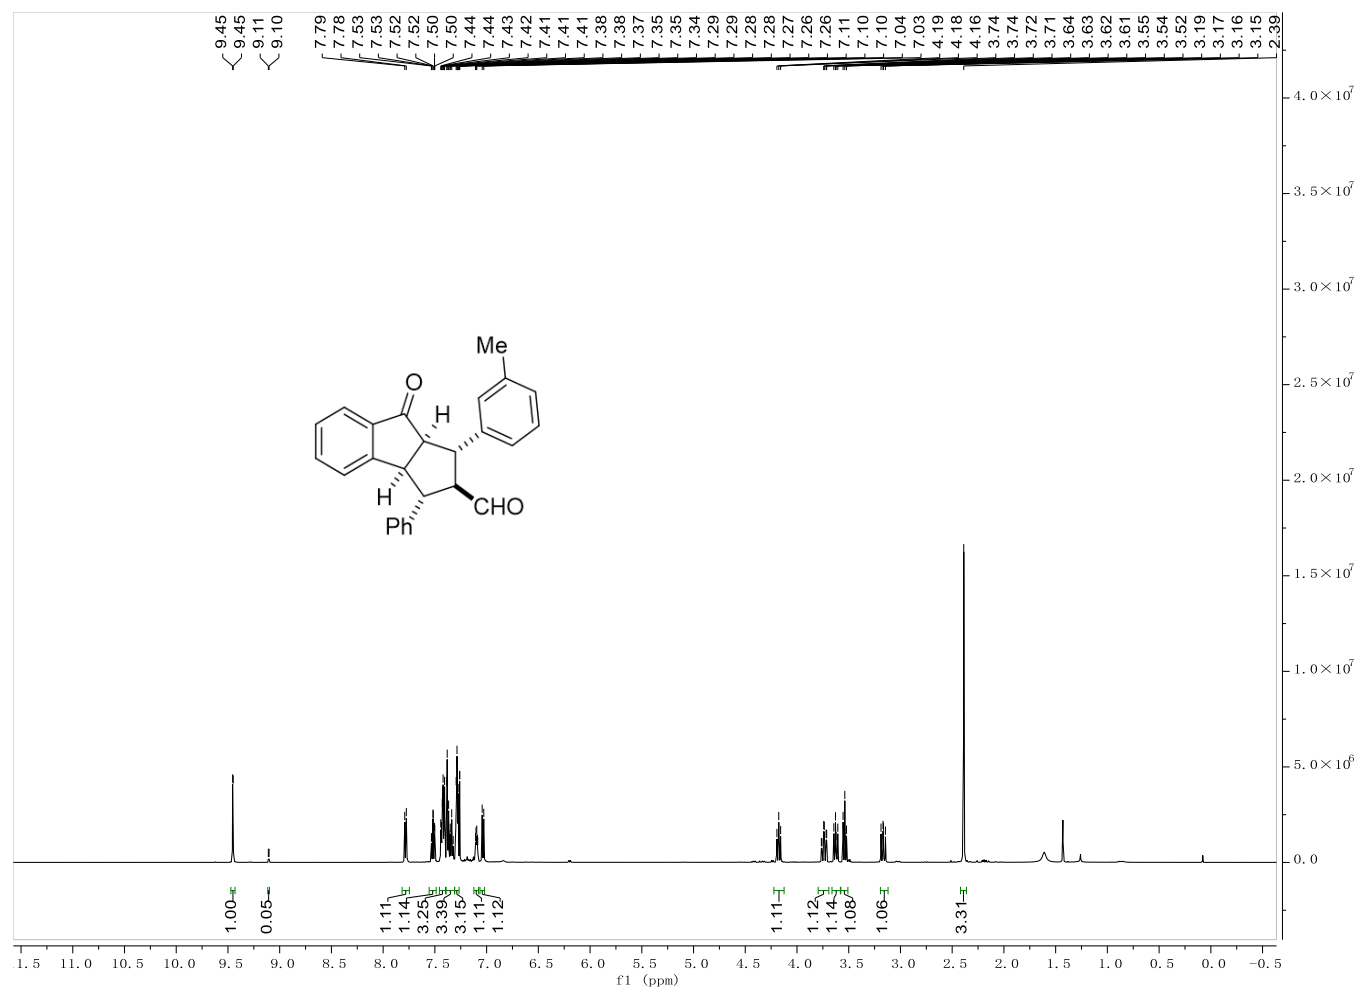



<sup>13</sup>C NMR spectrum of **3ja** (125 MHz, CDCl<sub>3</sub>)

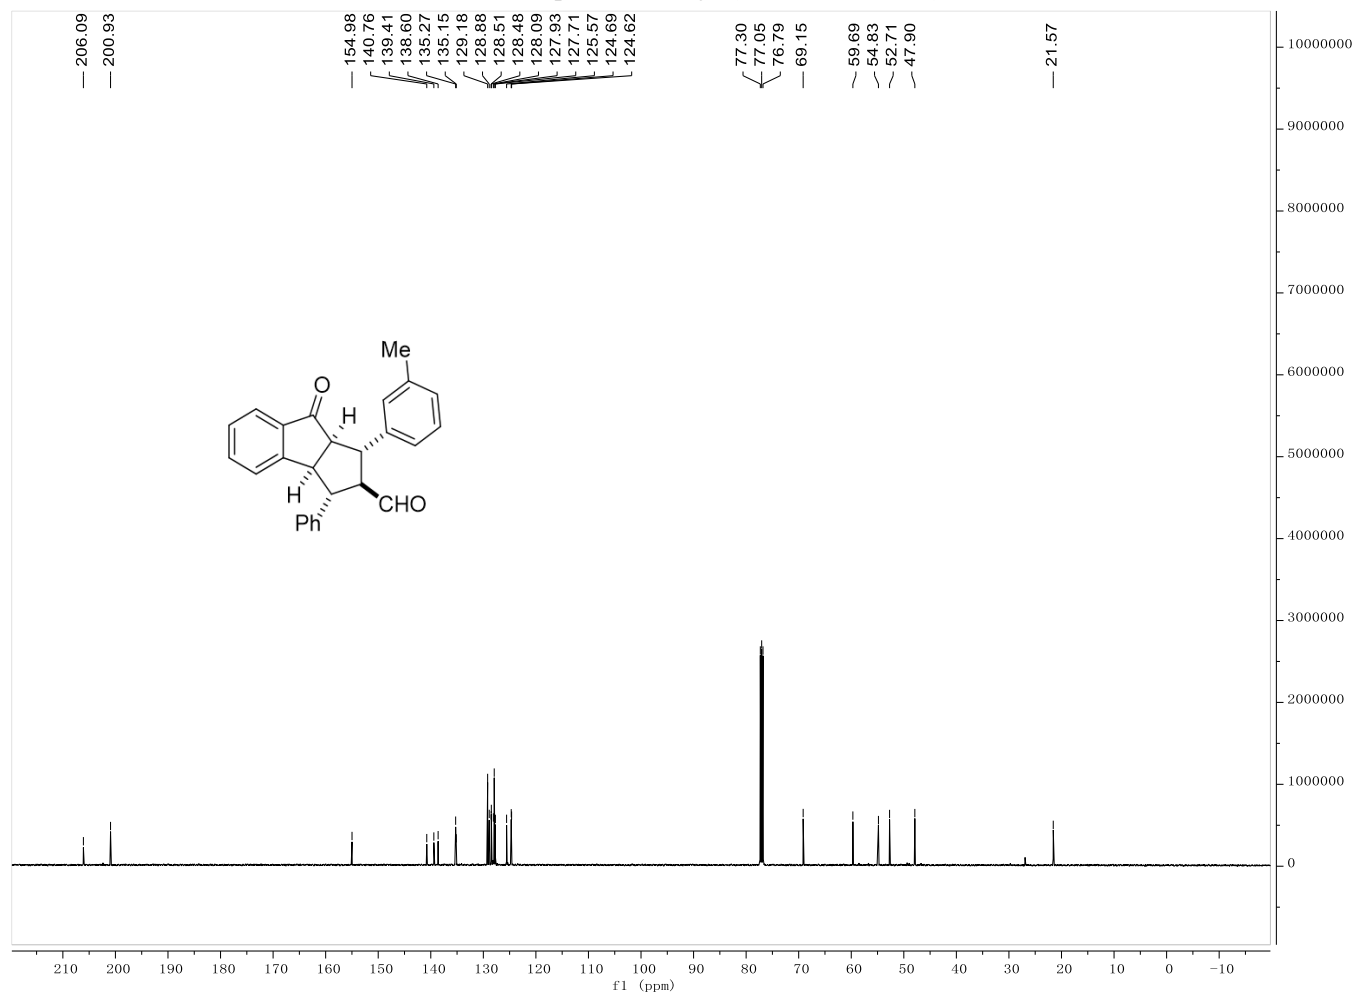

<sup>1</sup>H NMR spectrum of **3ka** (500 MHz, DMSO-*d*<sub>6</sub>)

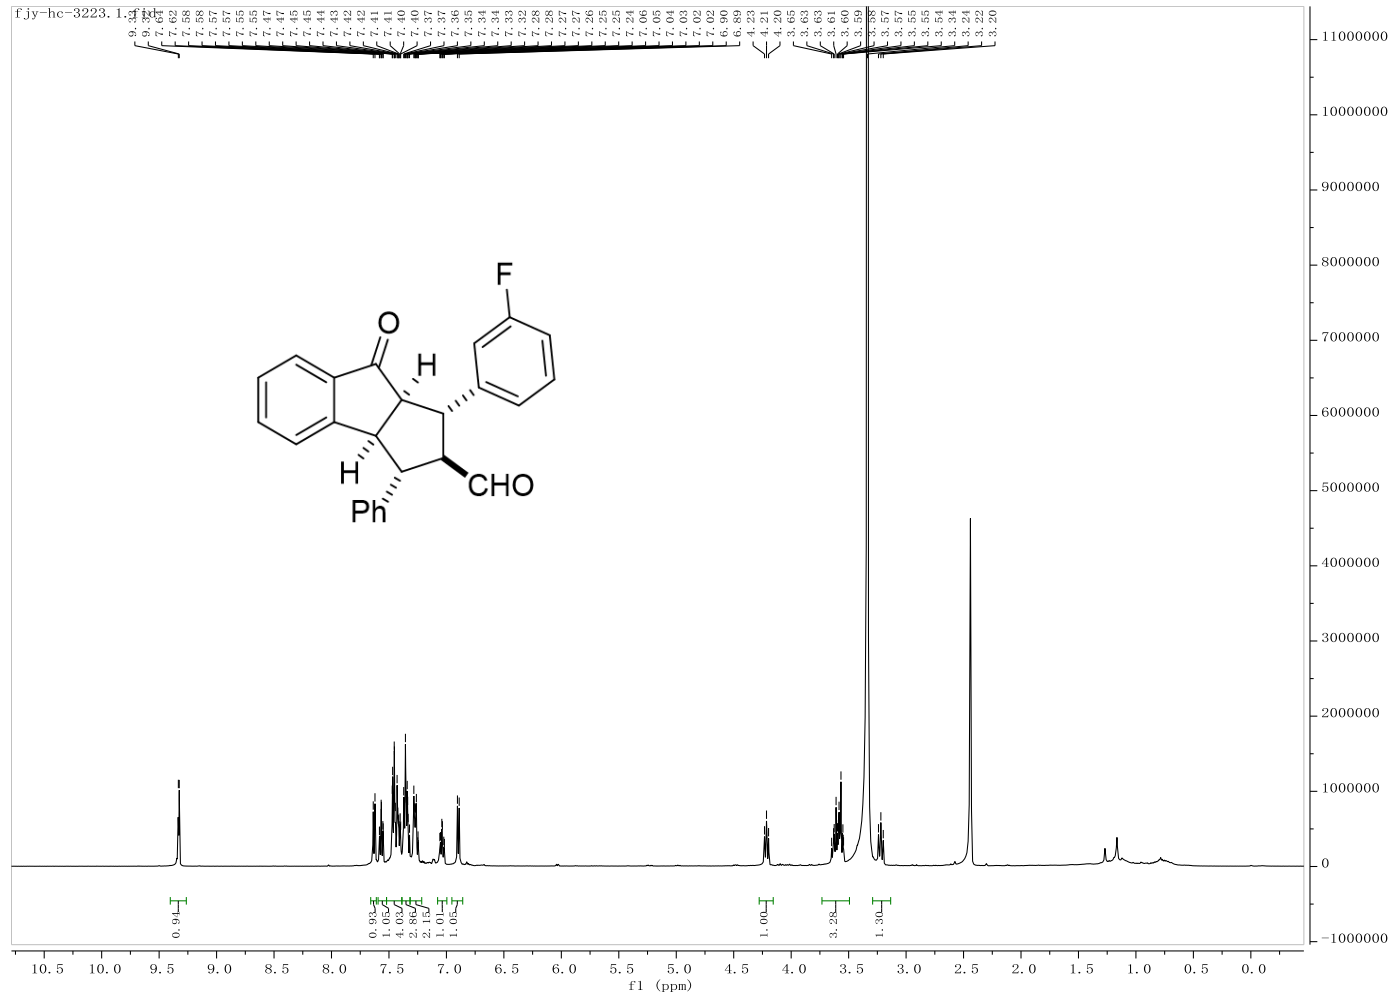

<sup>13</sup>C NMR spectrum of **3ka** (125 MHz, DMSO-*d*<sub>6</sub>)

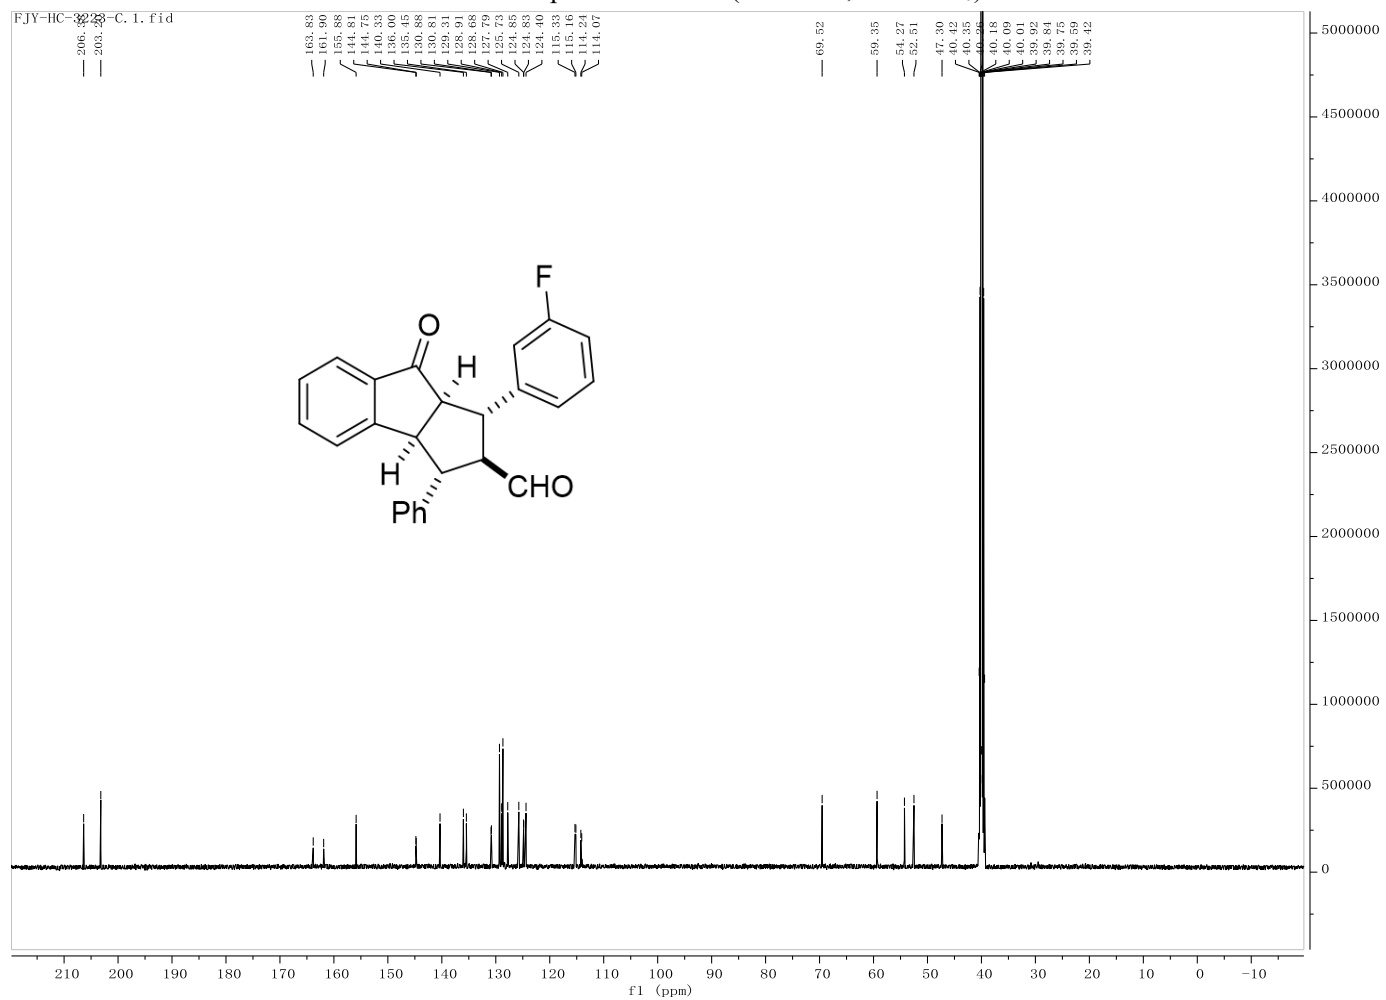

<sup>1</sup>H NMR spectrum of **3la** (400 MHz, CDCl<sub>3</sub>)

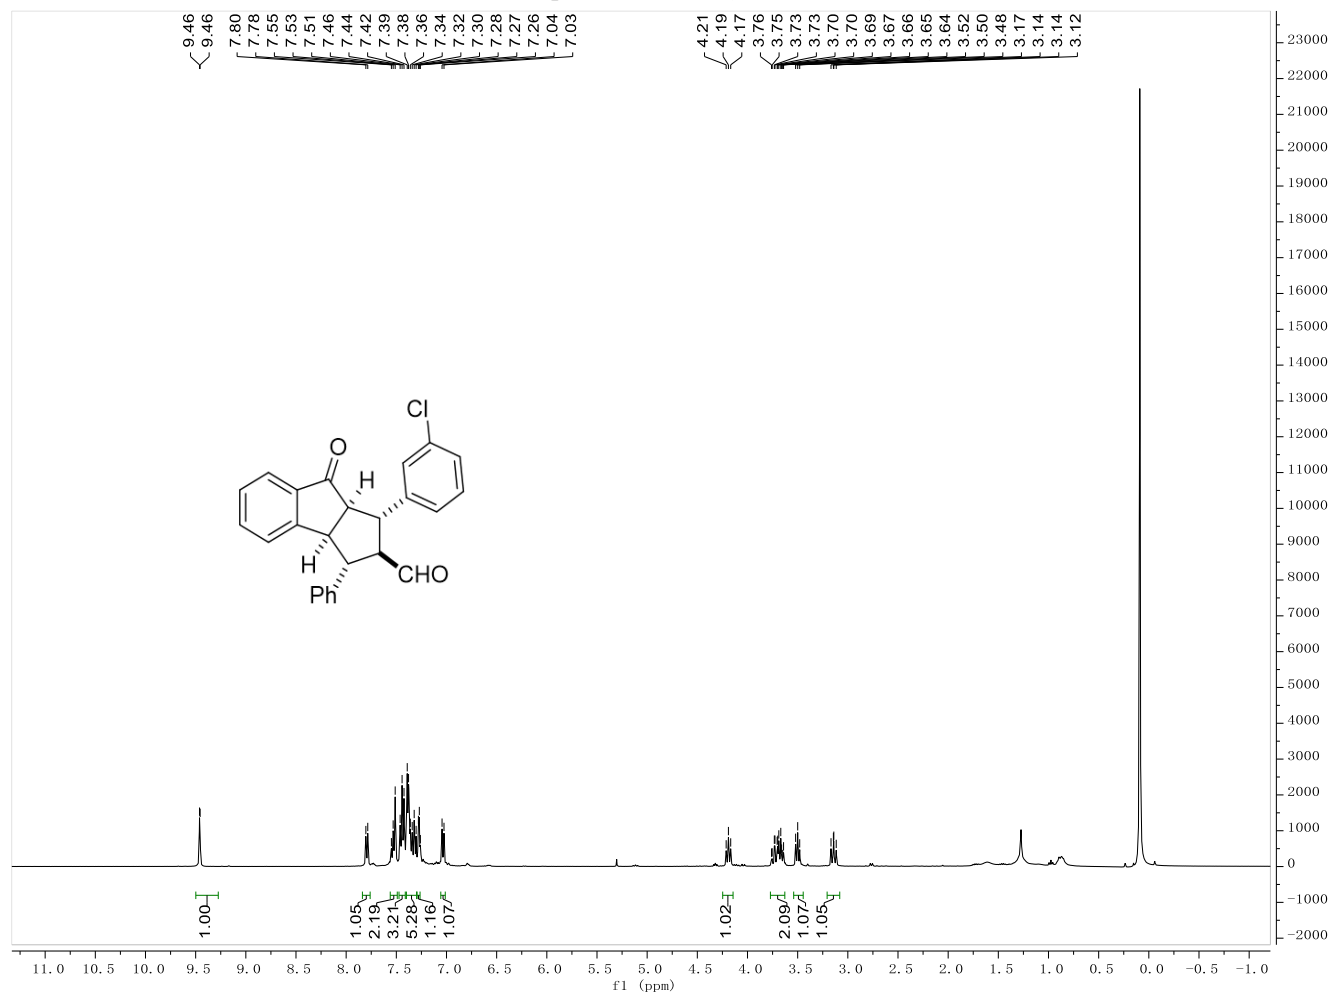

$^{13}\text{C}$  NMR spectrum of **3la** (100 MHz,  $\text{CDCl}_3$ )

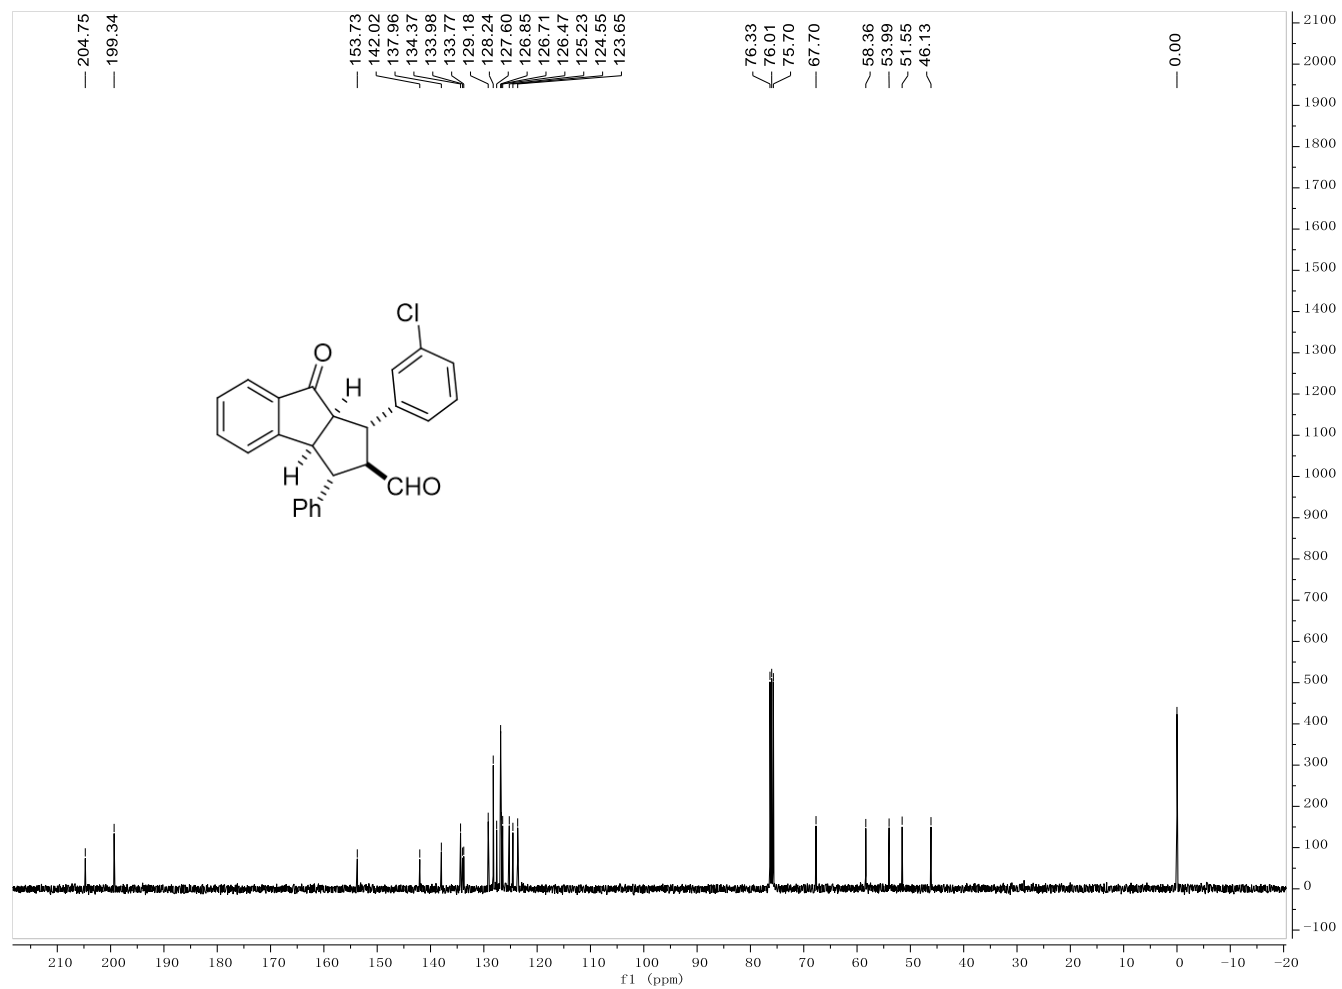

<sup>1</sup>H NMR spectrum of **3ma** (400 MHz, CDCl<sub>3</sub>)

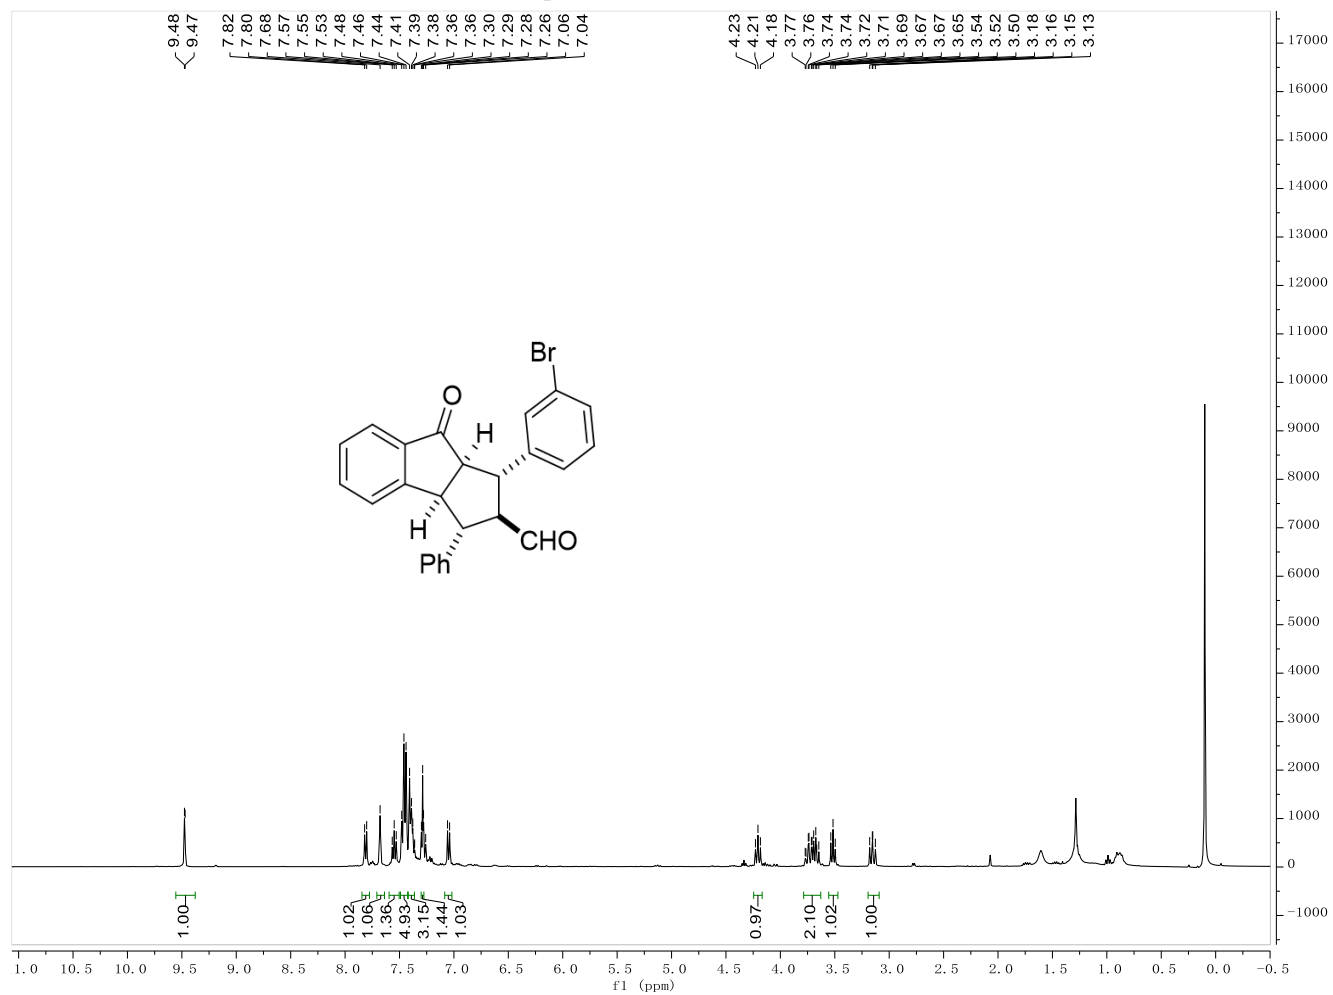

<sup>13</sup>C NMR spectrum of **3ma** (100 MHz, CDCl<sub>3</sub>)

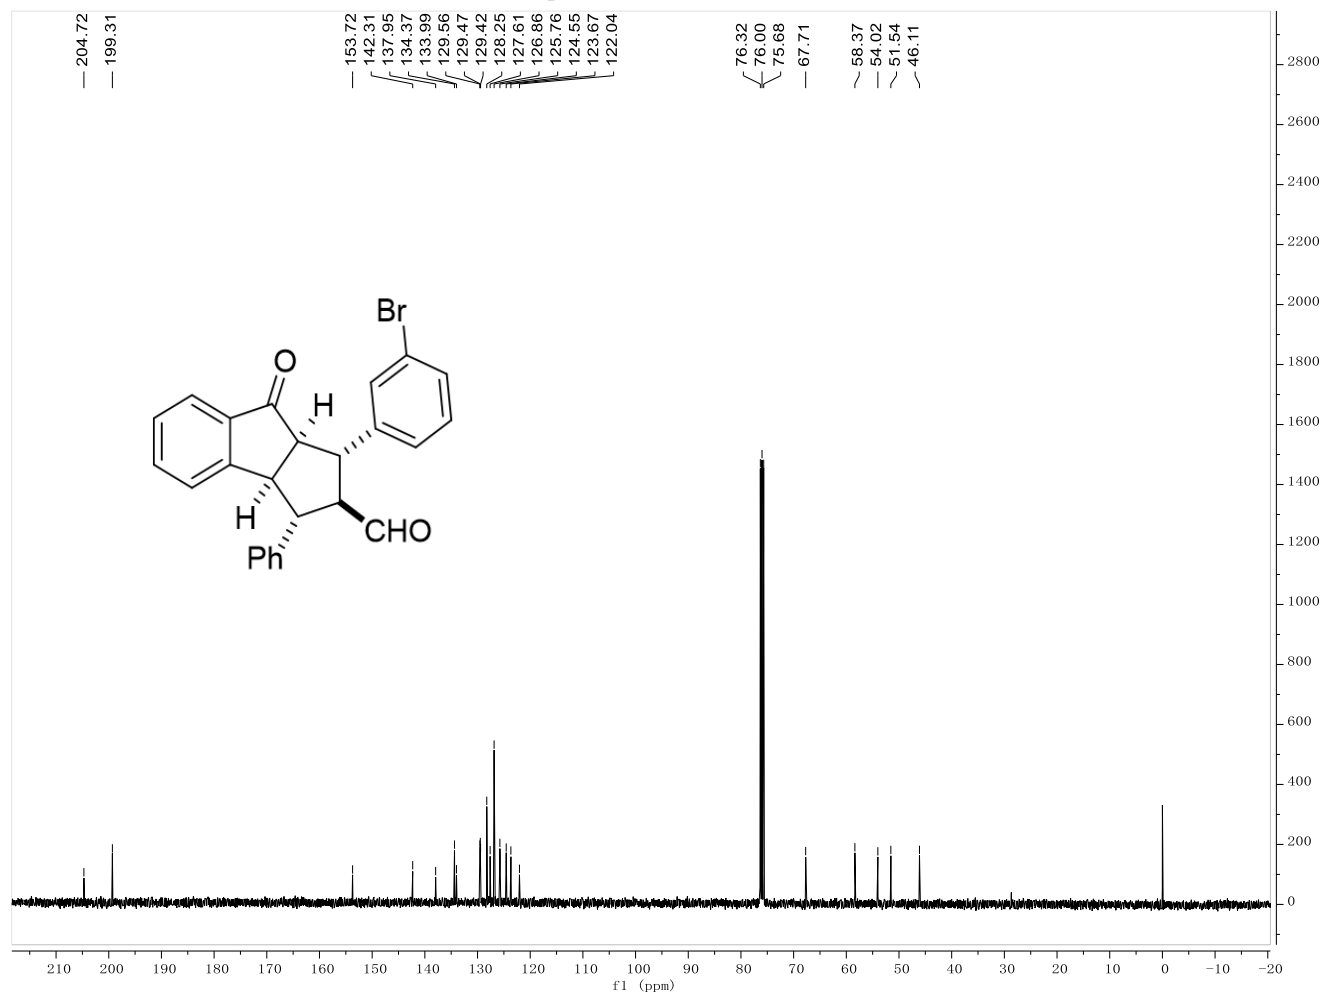

<sup>1</sup>H NMR spectrum of **3na** (400 MHz, CDCl<sub>3</sub>)

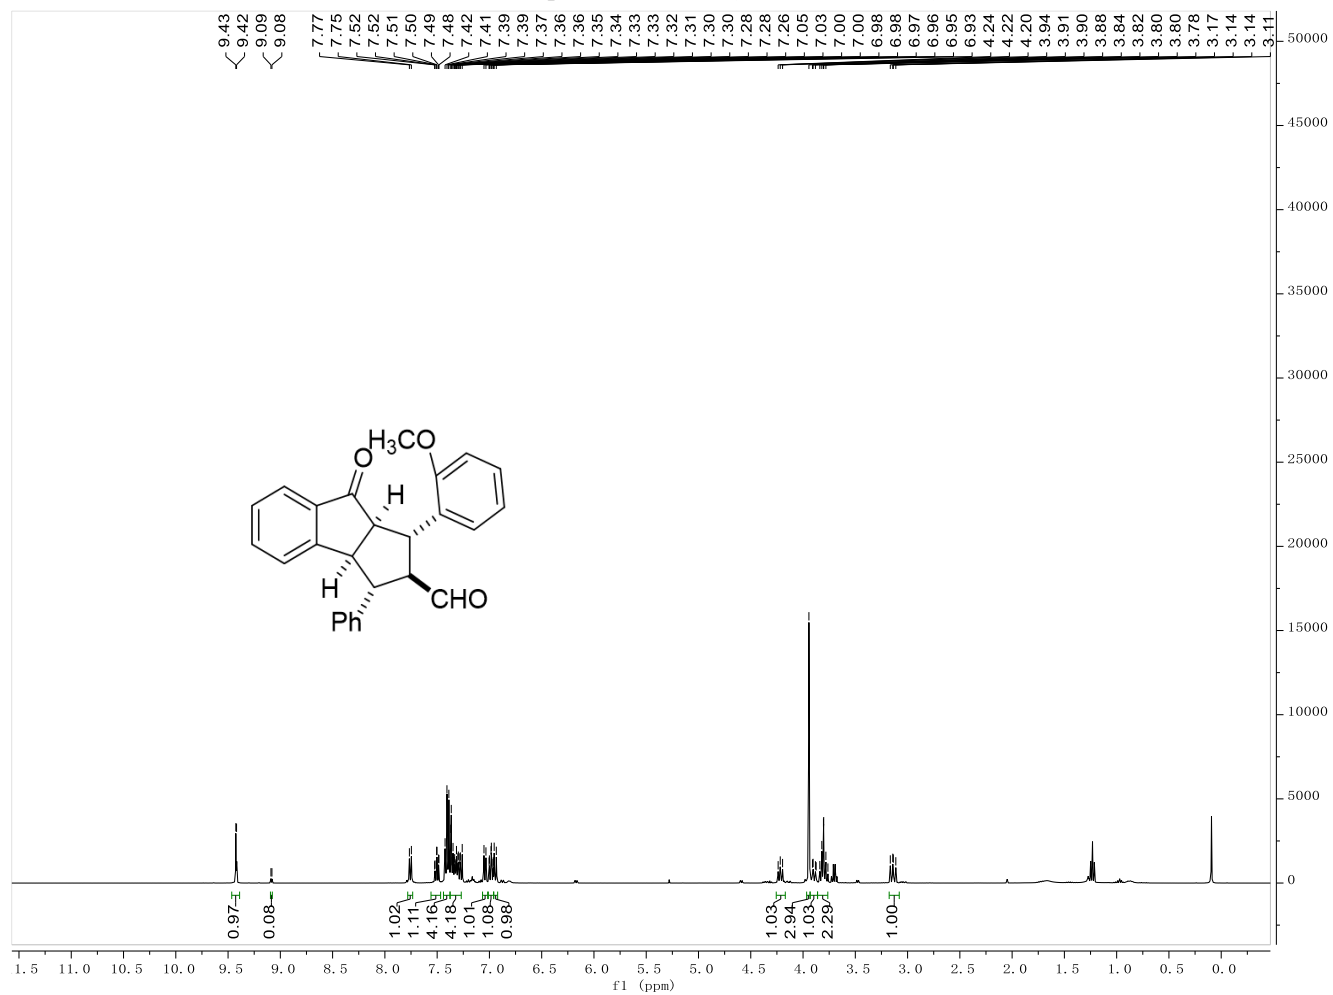



<sup>13</sup>C NMR spectrum of **3na** (100 MHz, CDCl<sub>3</sub>)

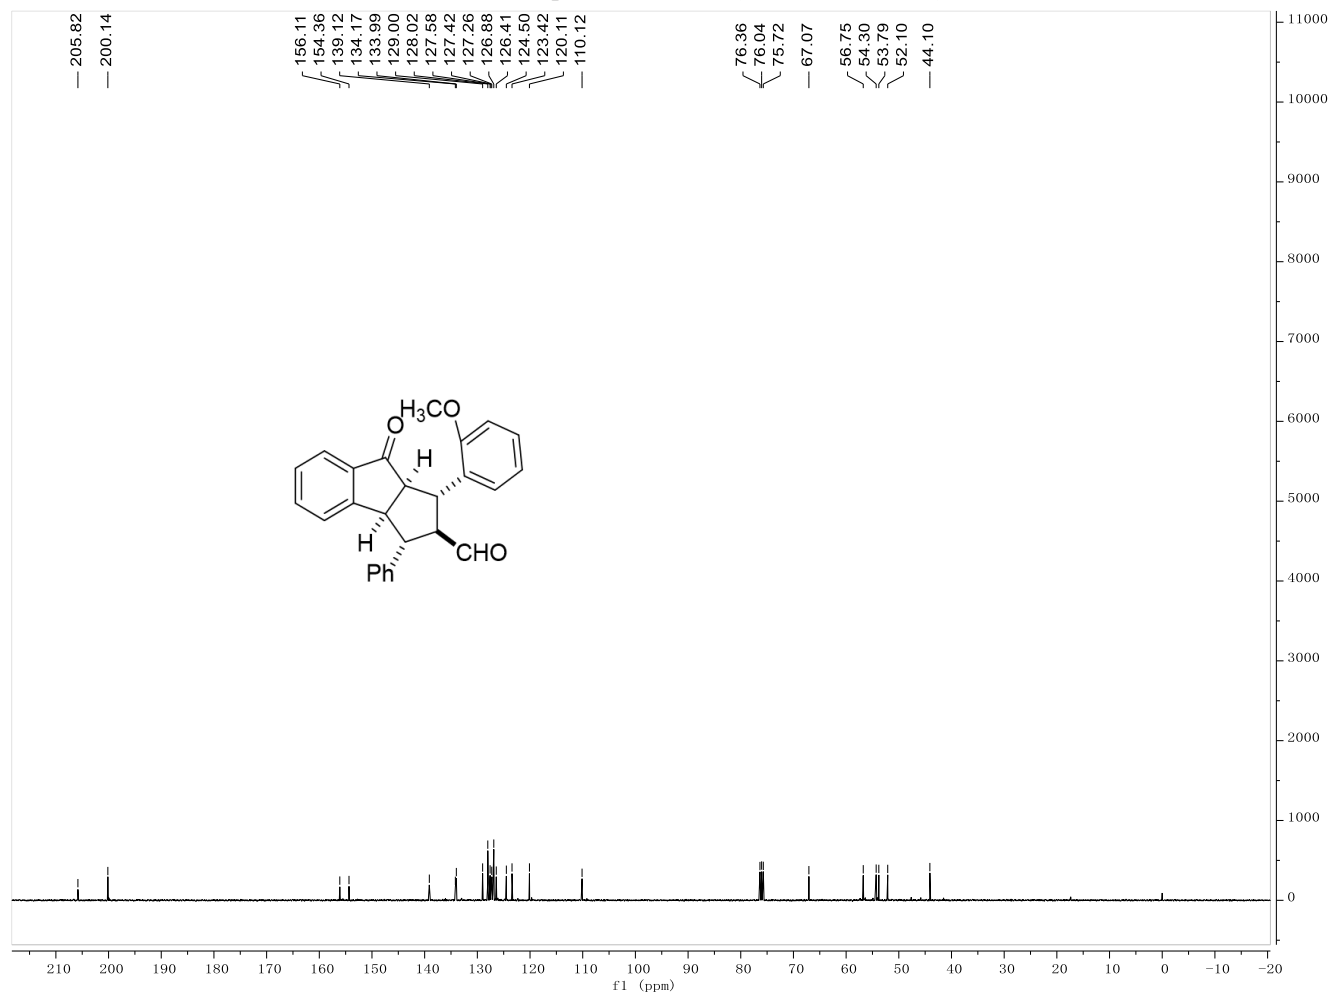

<sup>1</sup>H NMR spectrum of **30a** (400 MHz, CDCl<sub>3</sub>)

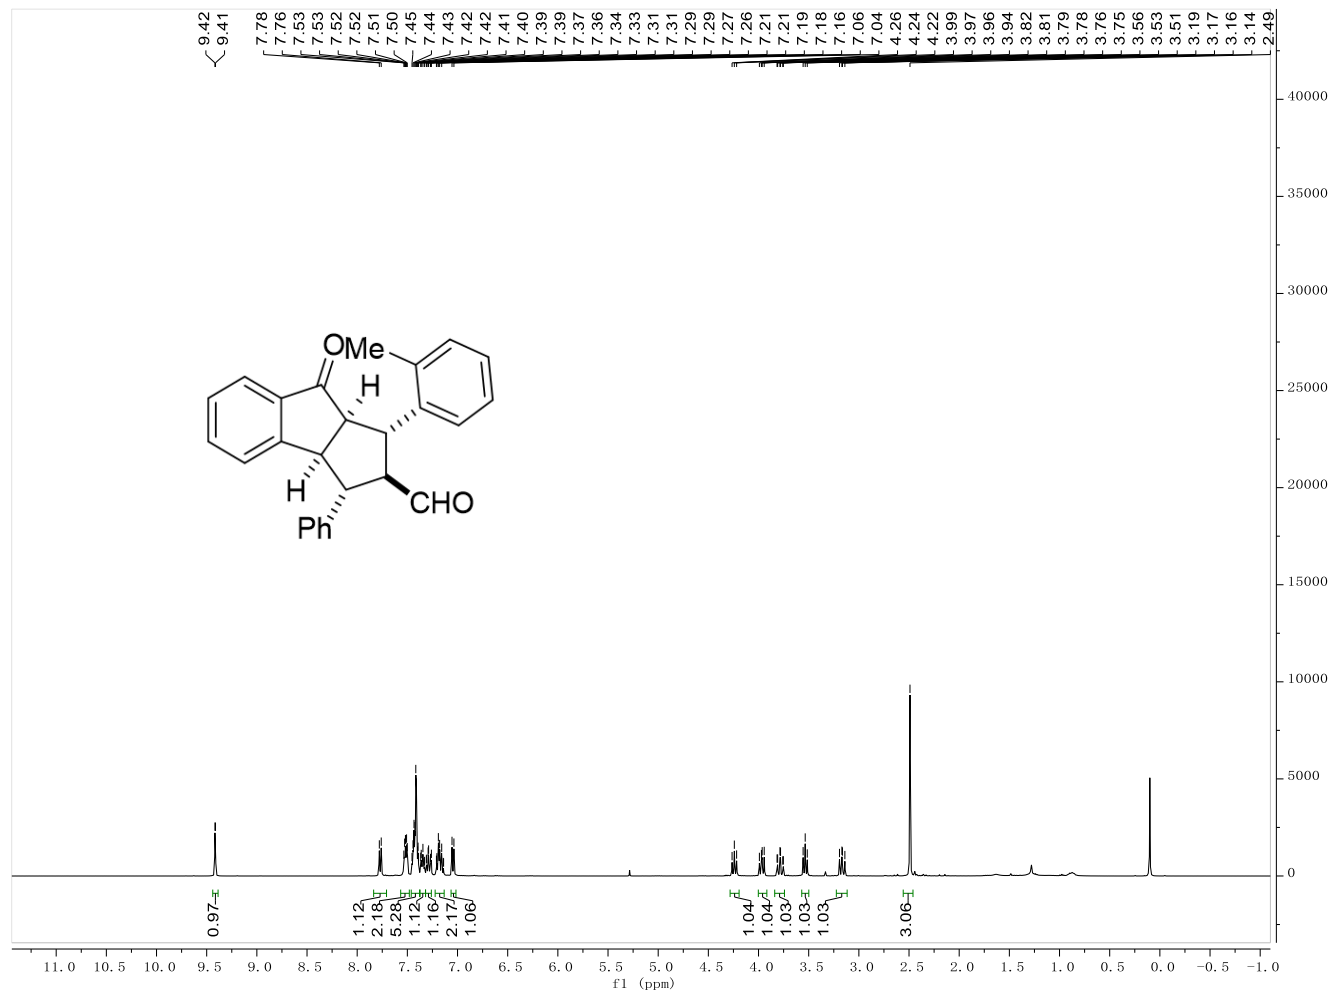

<sup>13</sup>C NMR spectrum of **30a** (100 MHz, CDCl<sub>3</sub>)

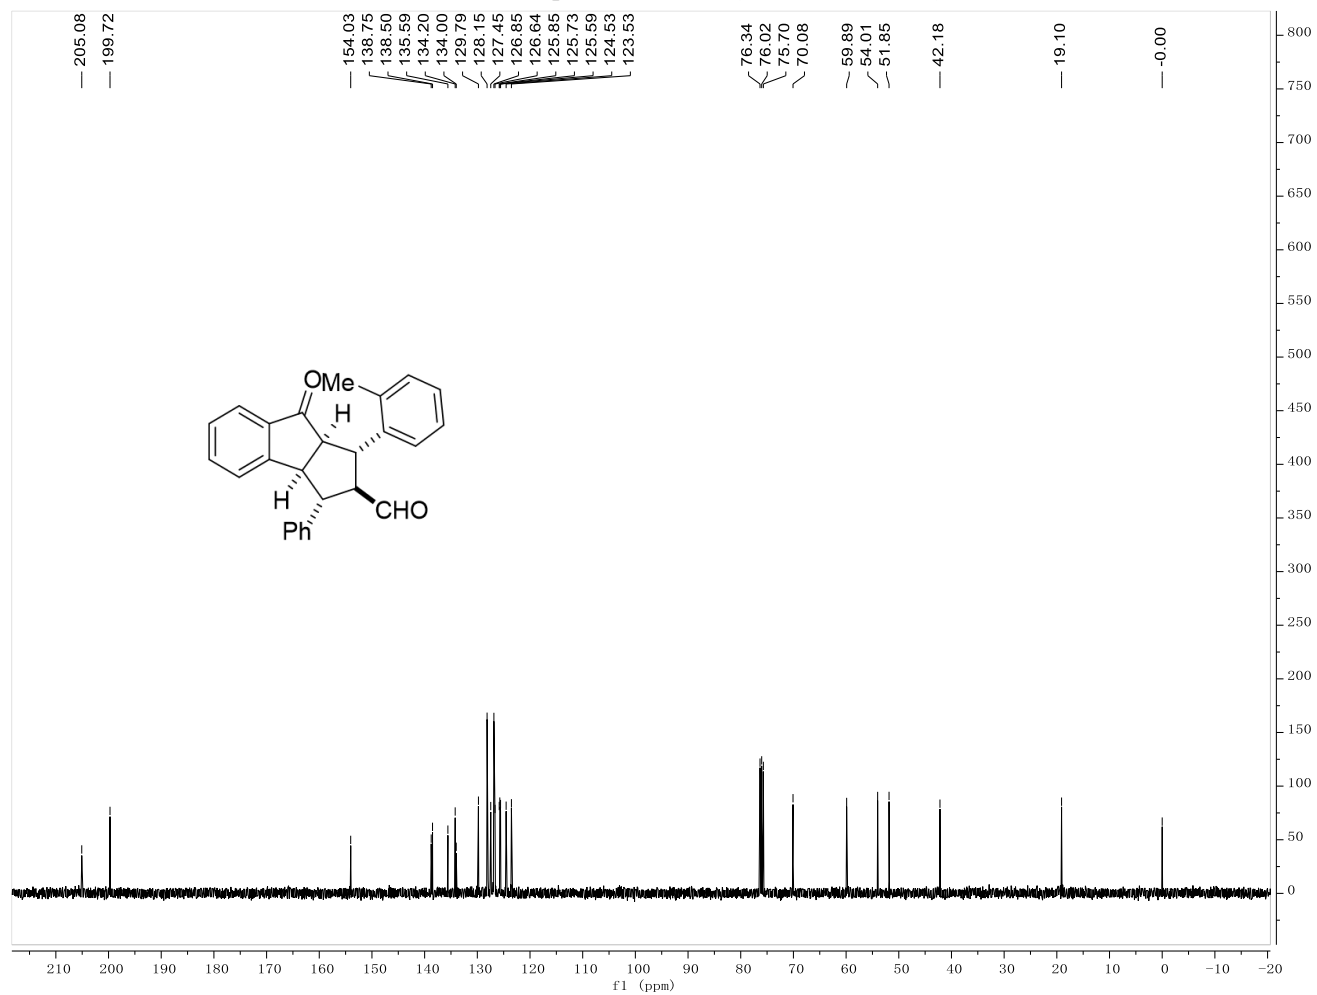

<sup>1</sup>H NMR spectrum of **3pa** (400 MHz, CDCl<sub>3</sub>)

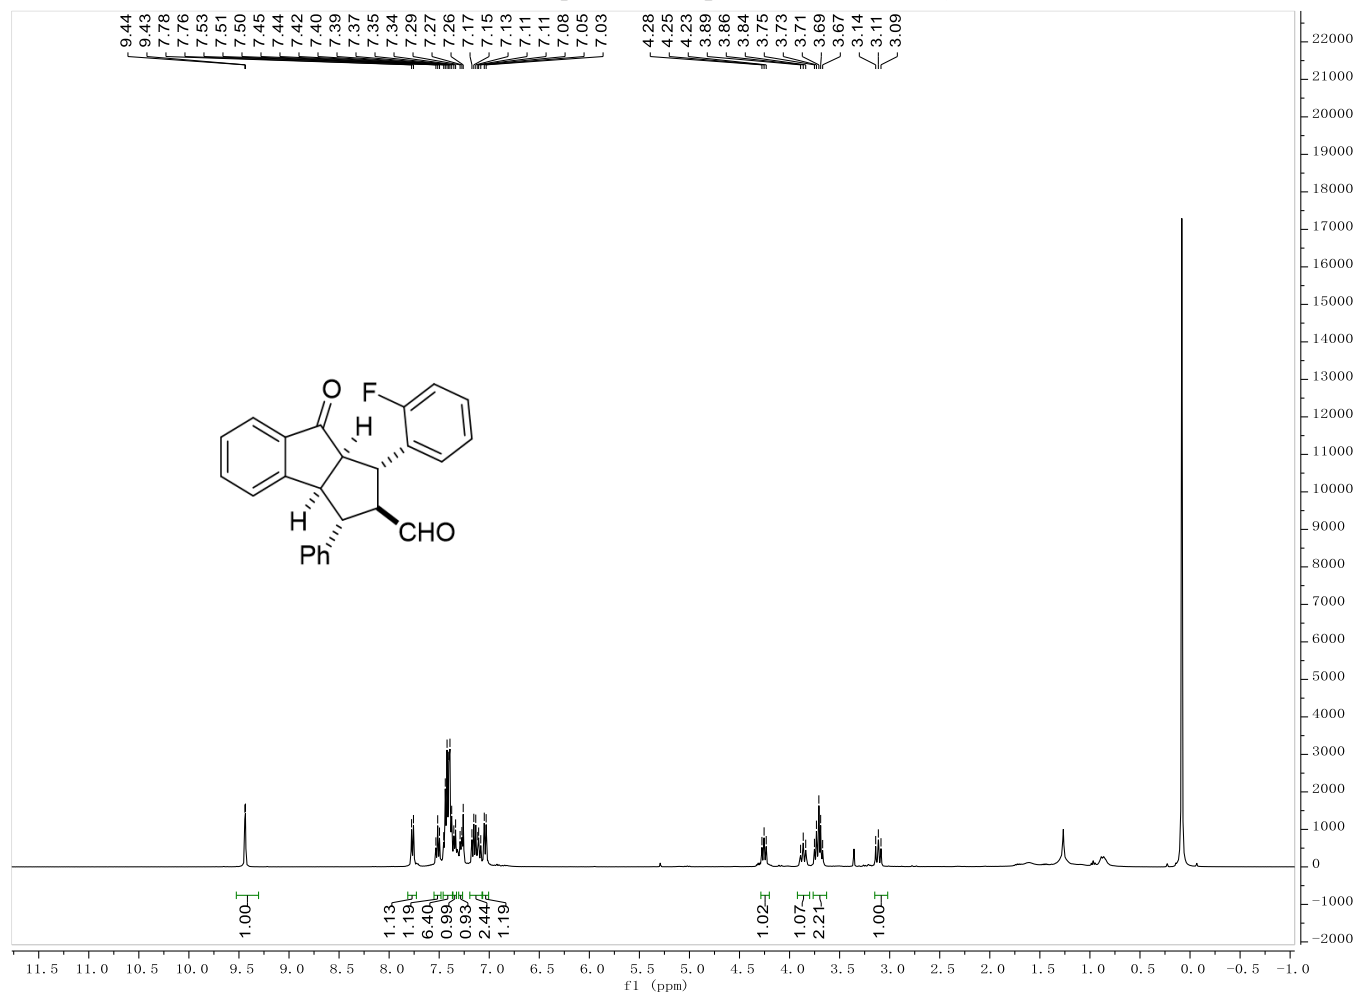

<sup>13</sup>C NMR spectrum of **3pa** (100 MHz, CDCl<sub>3</sub>)

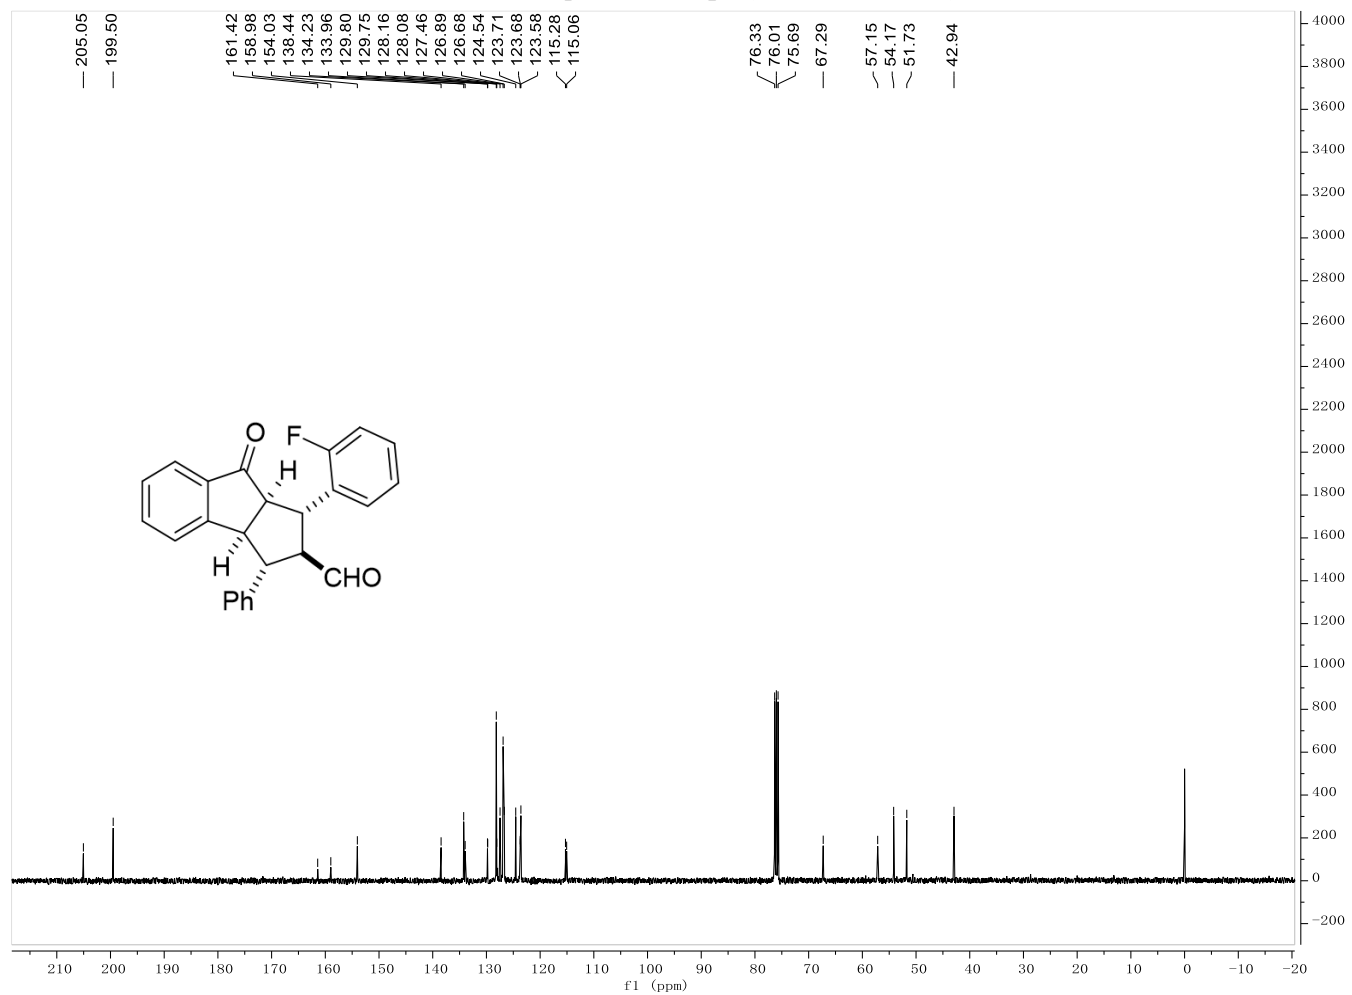

<sup>1</sup>H NMR spectrum of **3qa** (400 MHz, CDCl<sub>3</sub>)

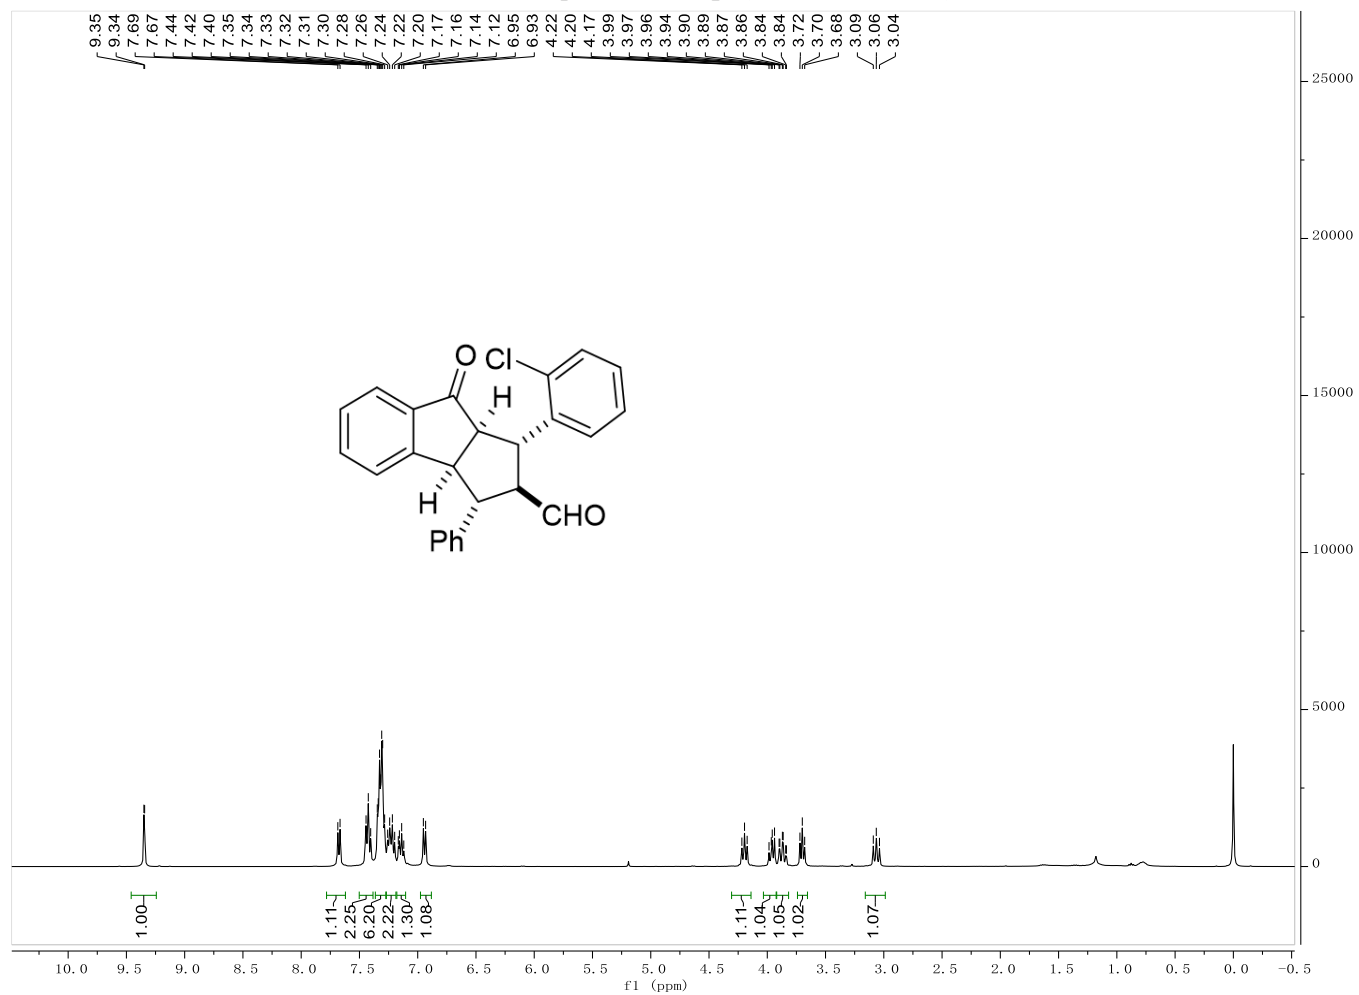

<sup>13</sup>C NMR spectrum of **3qa** (125 MHz, DMSO-*d*<sub>6</sub>)

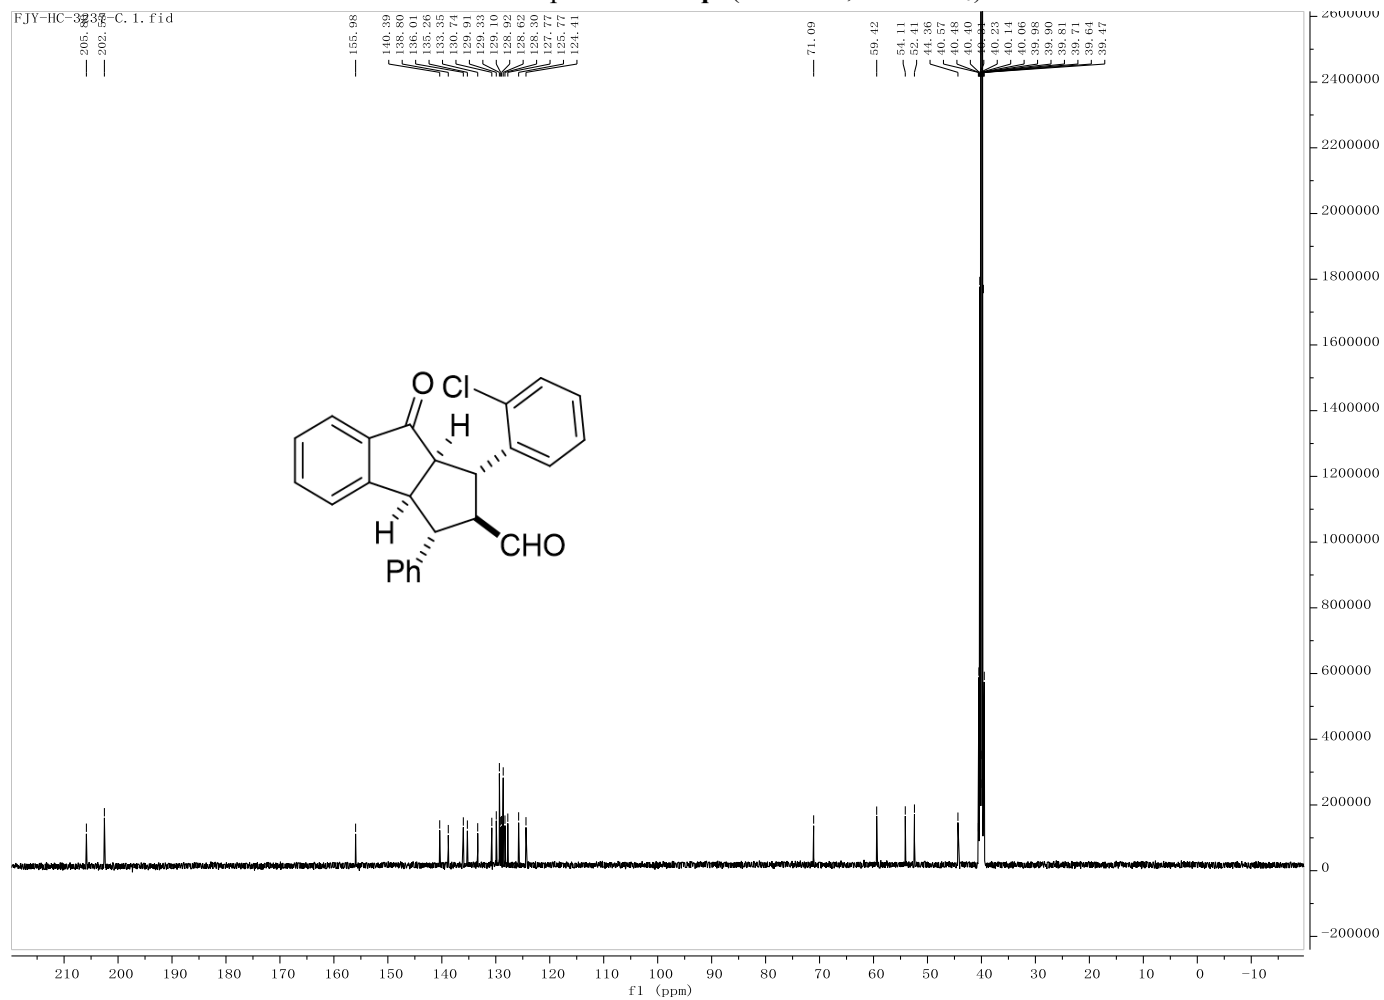

<sup>1</sup>H NMR spectrum of **3ra** (500 MHz, DMSO-d<sub>6</sub>)

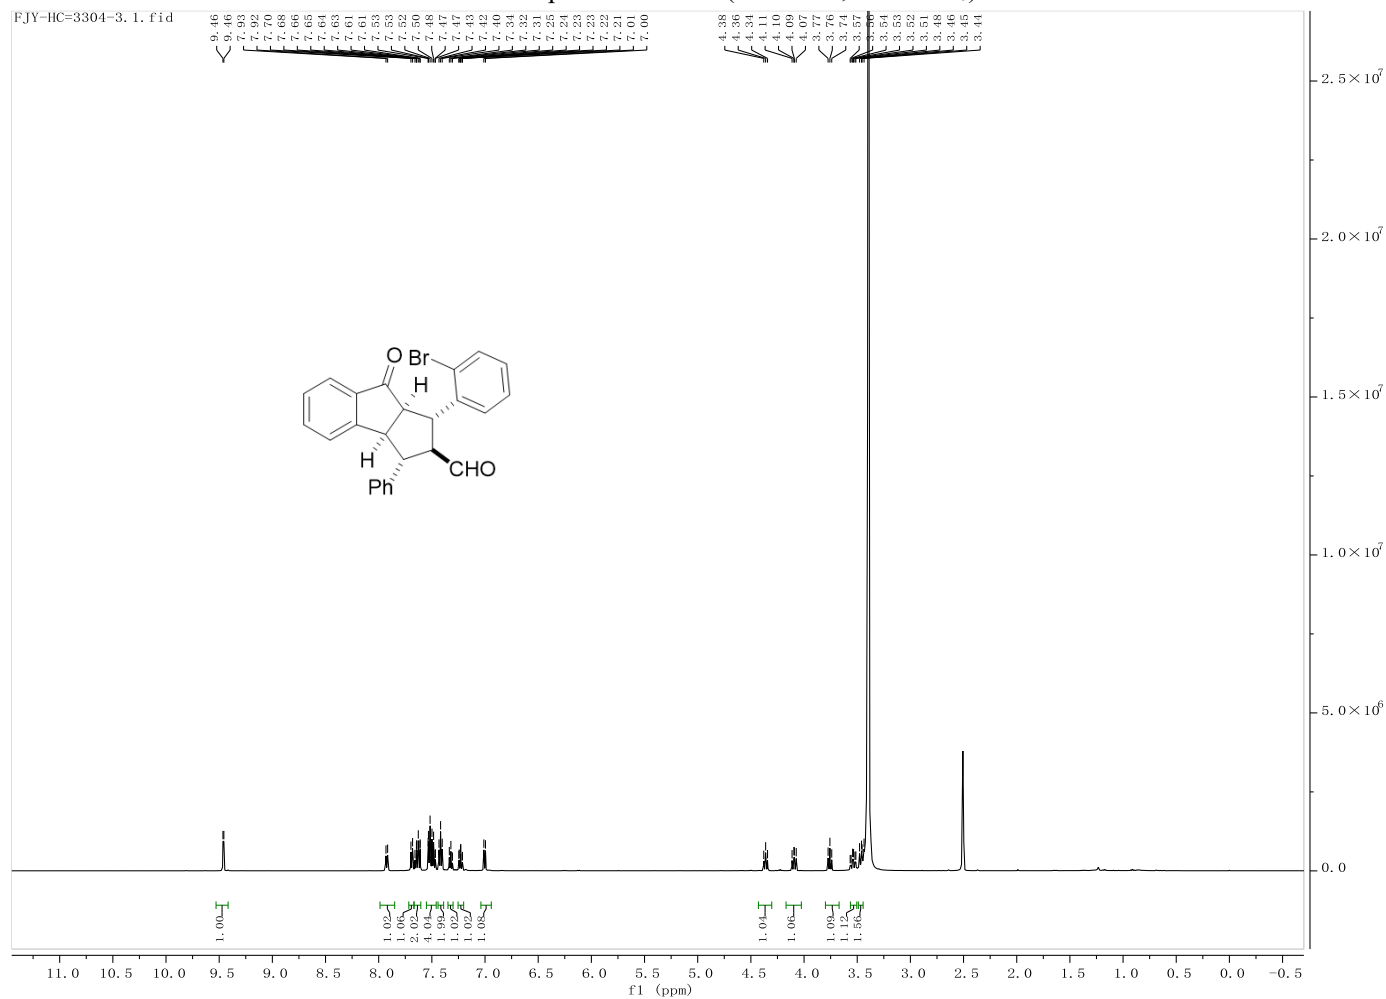



<sup>13</sup>C NMR spectrum of **3ra** (125 MHz, DMSO-*d*<sub>6</sub>)

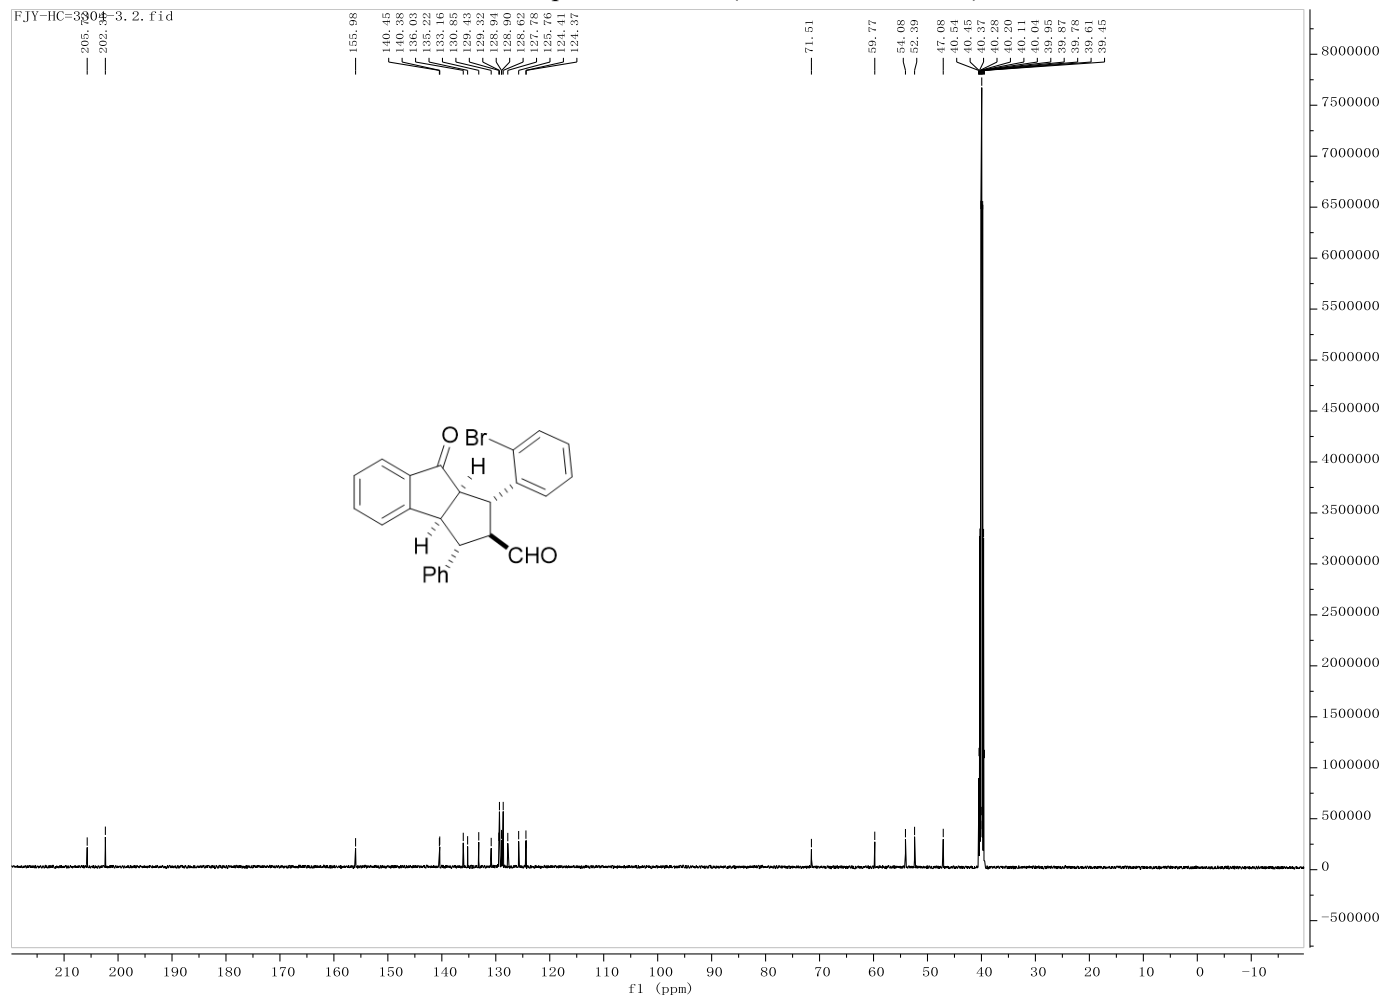

<sup>1</sup>H NMR spectrum of **3ab** (400 MHz, CDCl<sub>3</sub>)

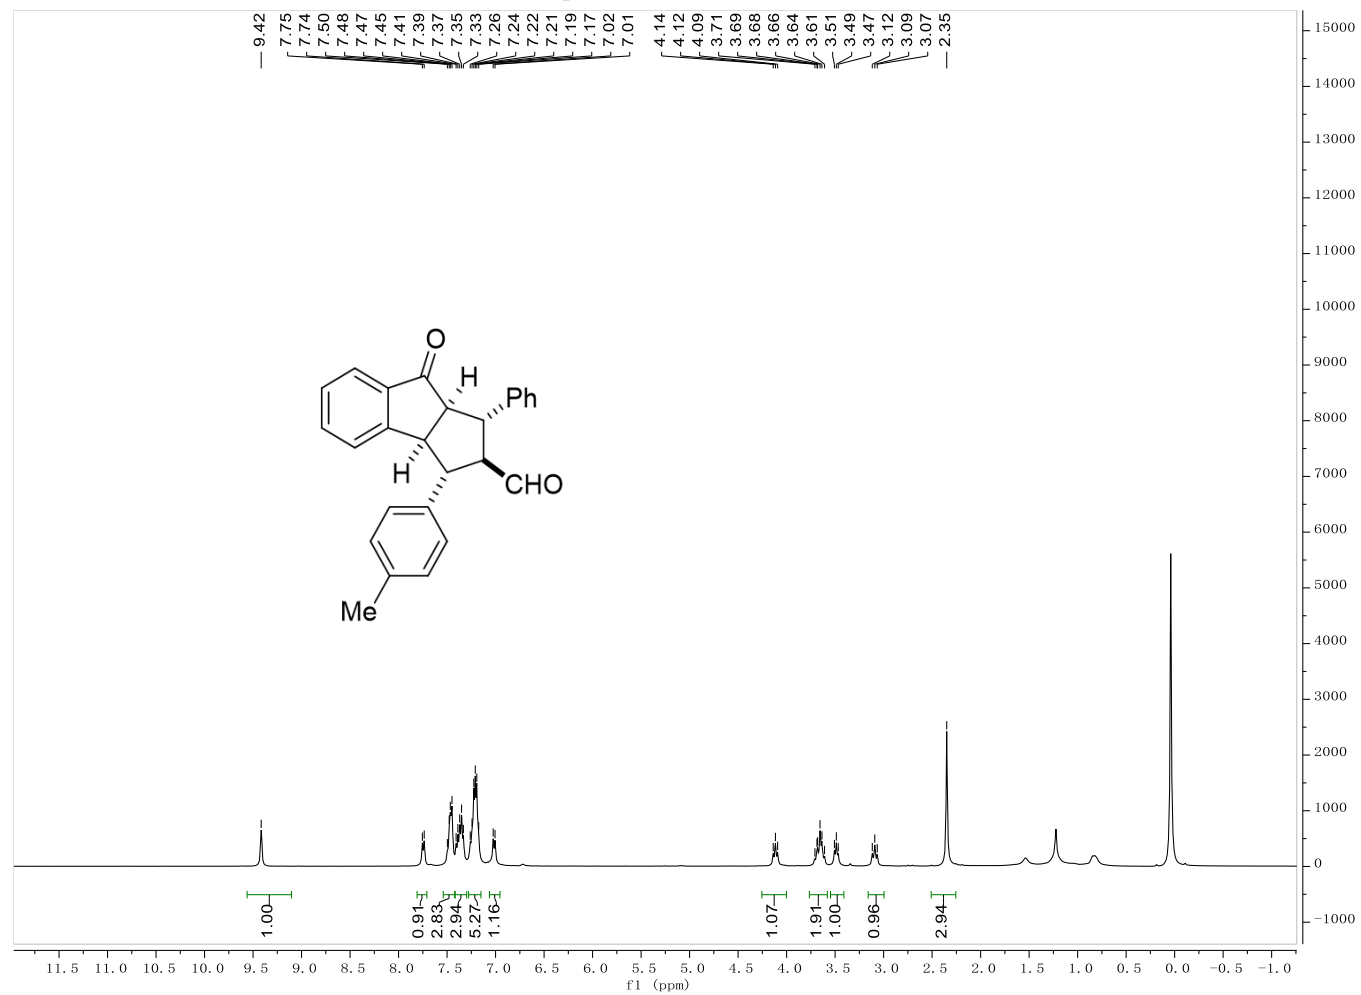

<sup>13</sup>C NMR spectrum of **3ab** (100 MHz, CDCl<sub>3</sub>)

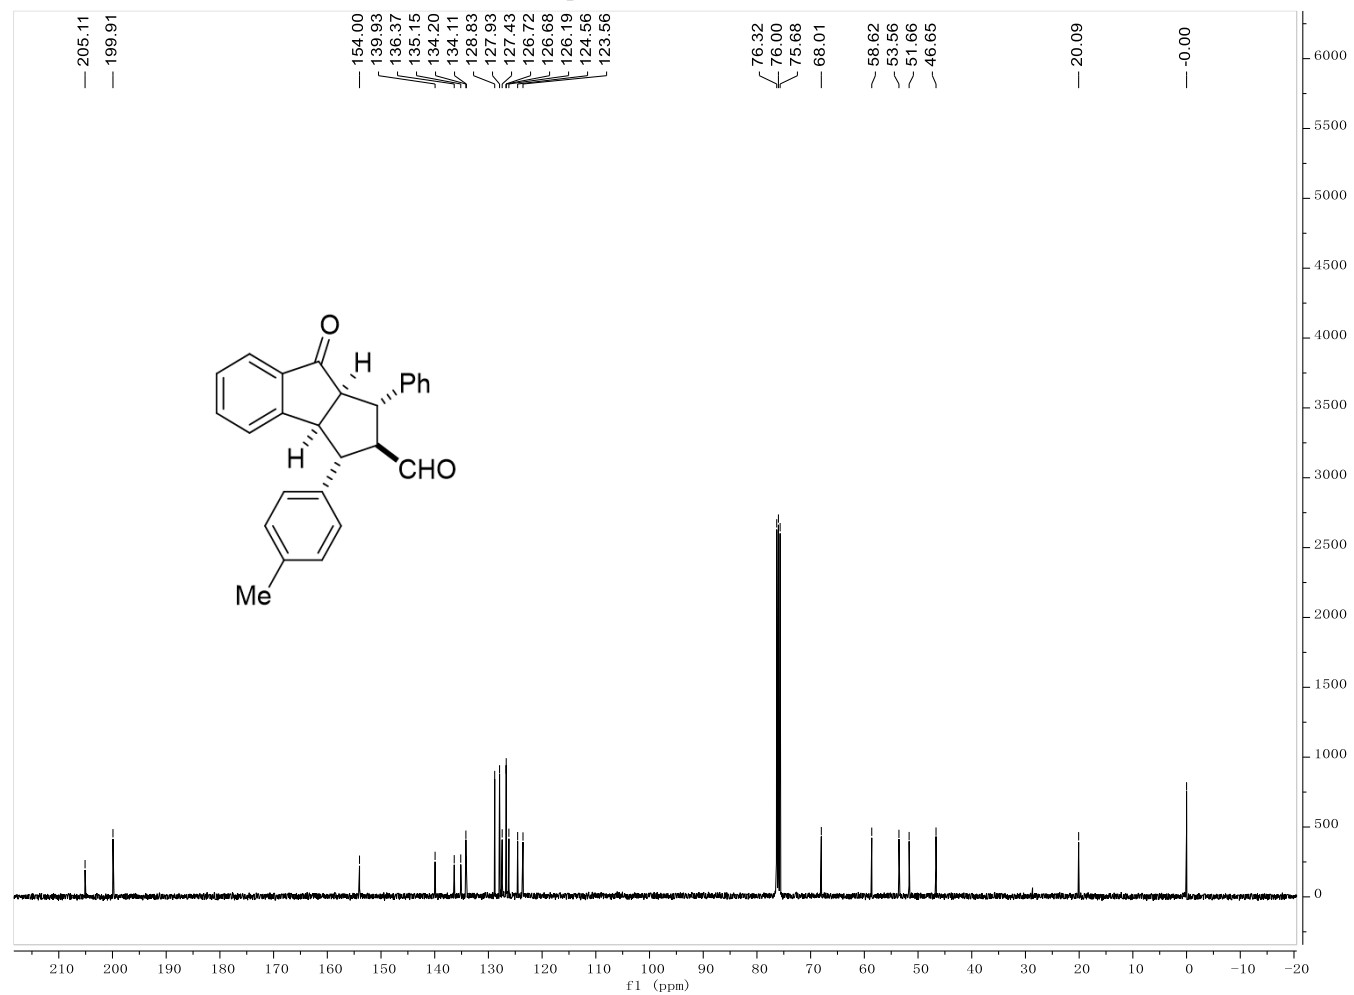

<sup>1</sup>H NMR spectrum of **3ac** (400 MHz, CDCl<sub>3</sub>)

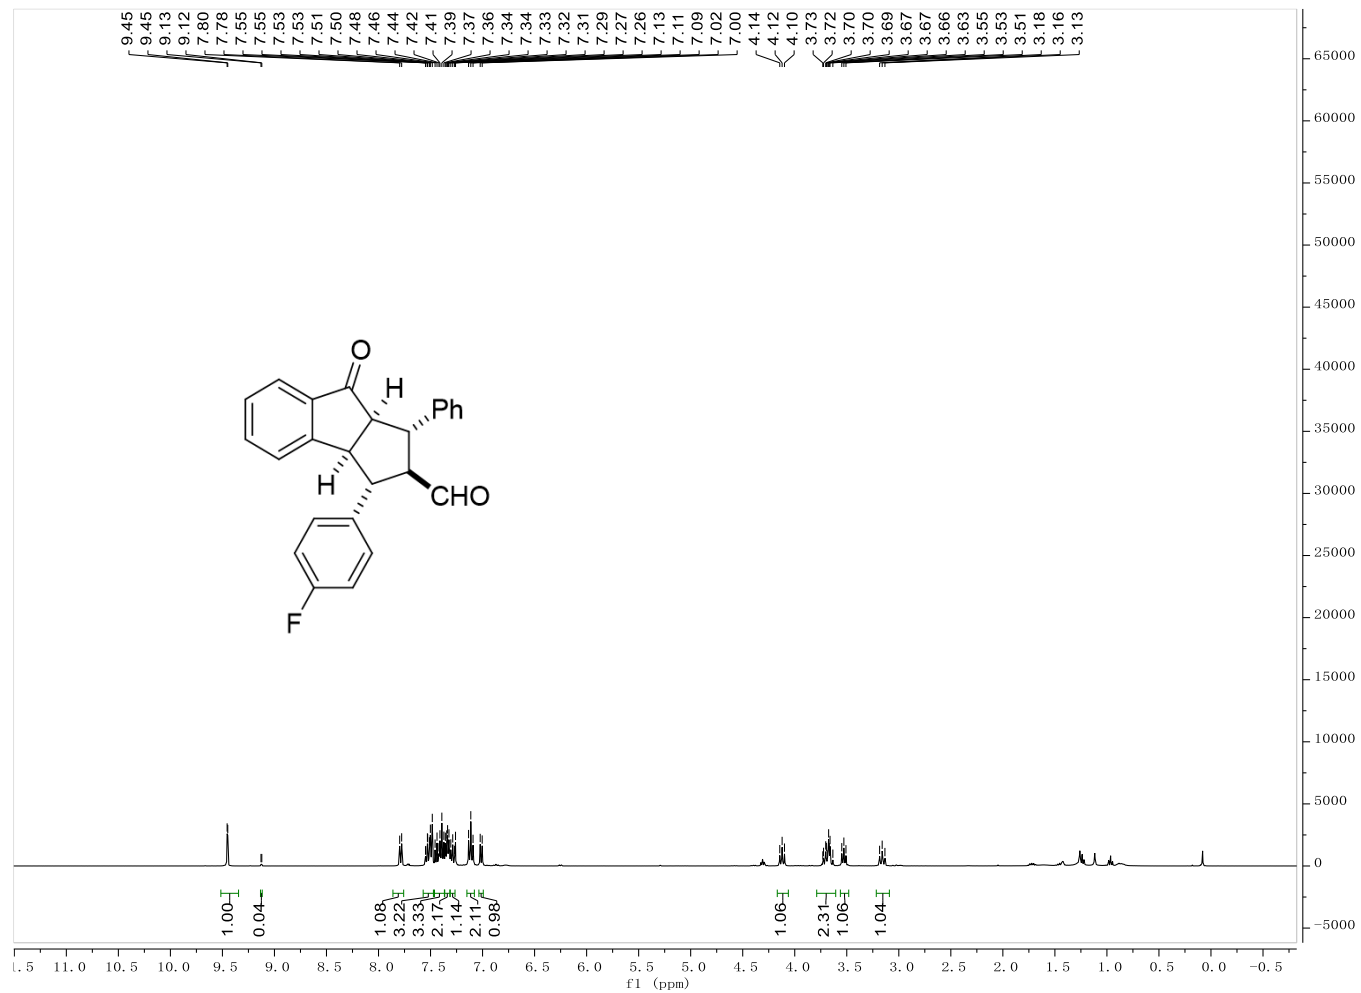

<sup>13</sup>C NMR spectrum of 3ac (125 MHz, DMSO-d<sub>6</sub>)

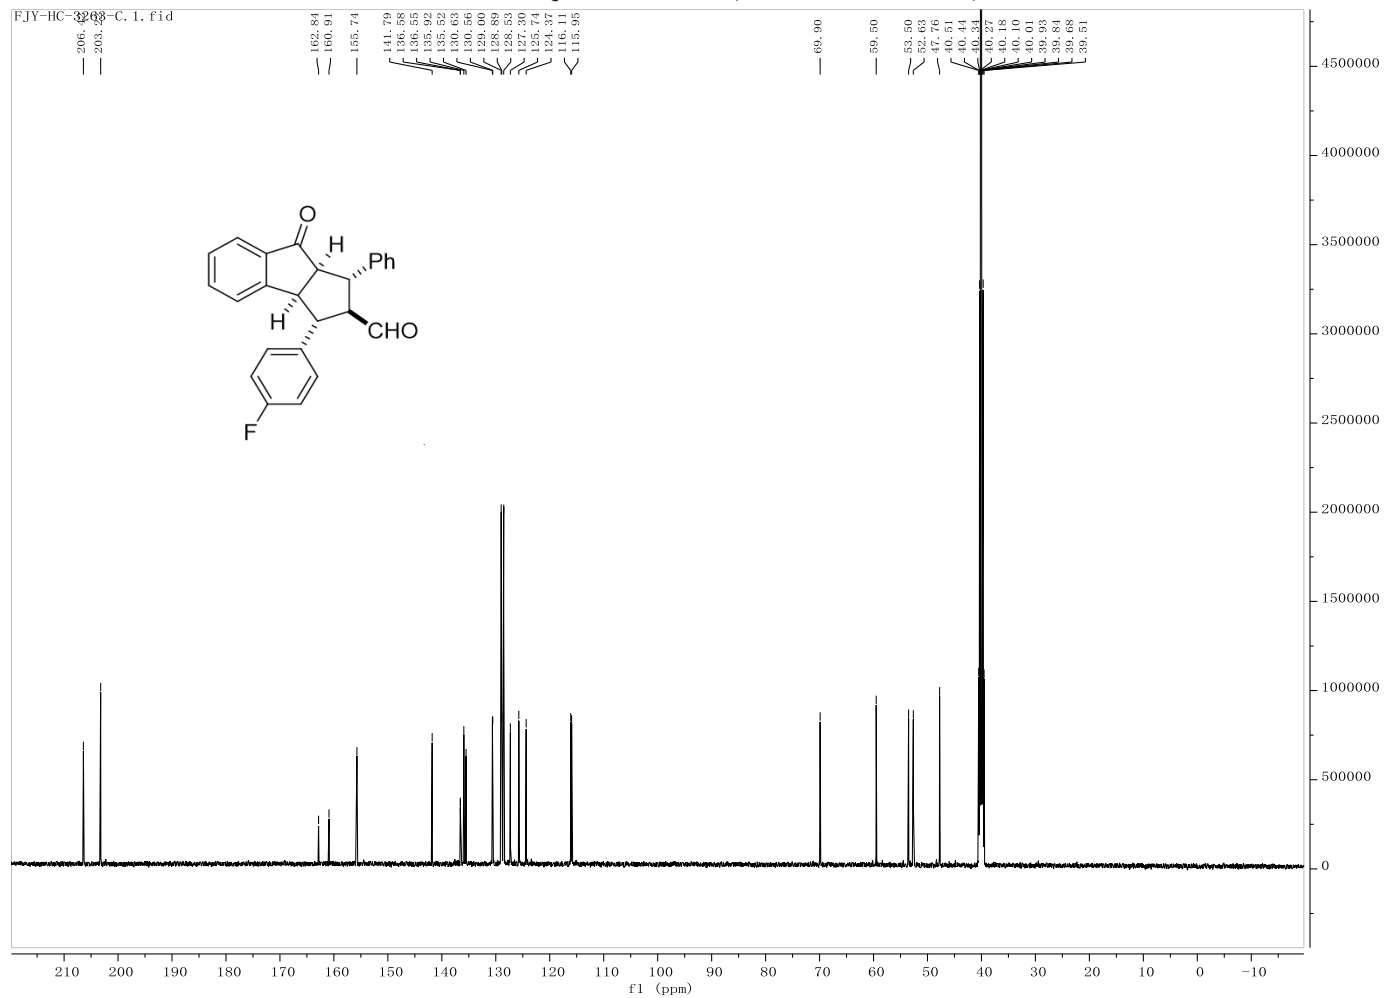

<sup>1</sup>H NMR spectrum of **3ad** (400 MHz, CDCl<sub>3</sub>)

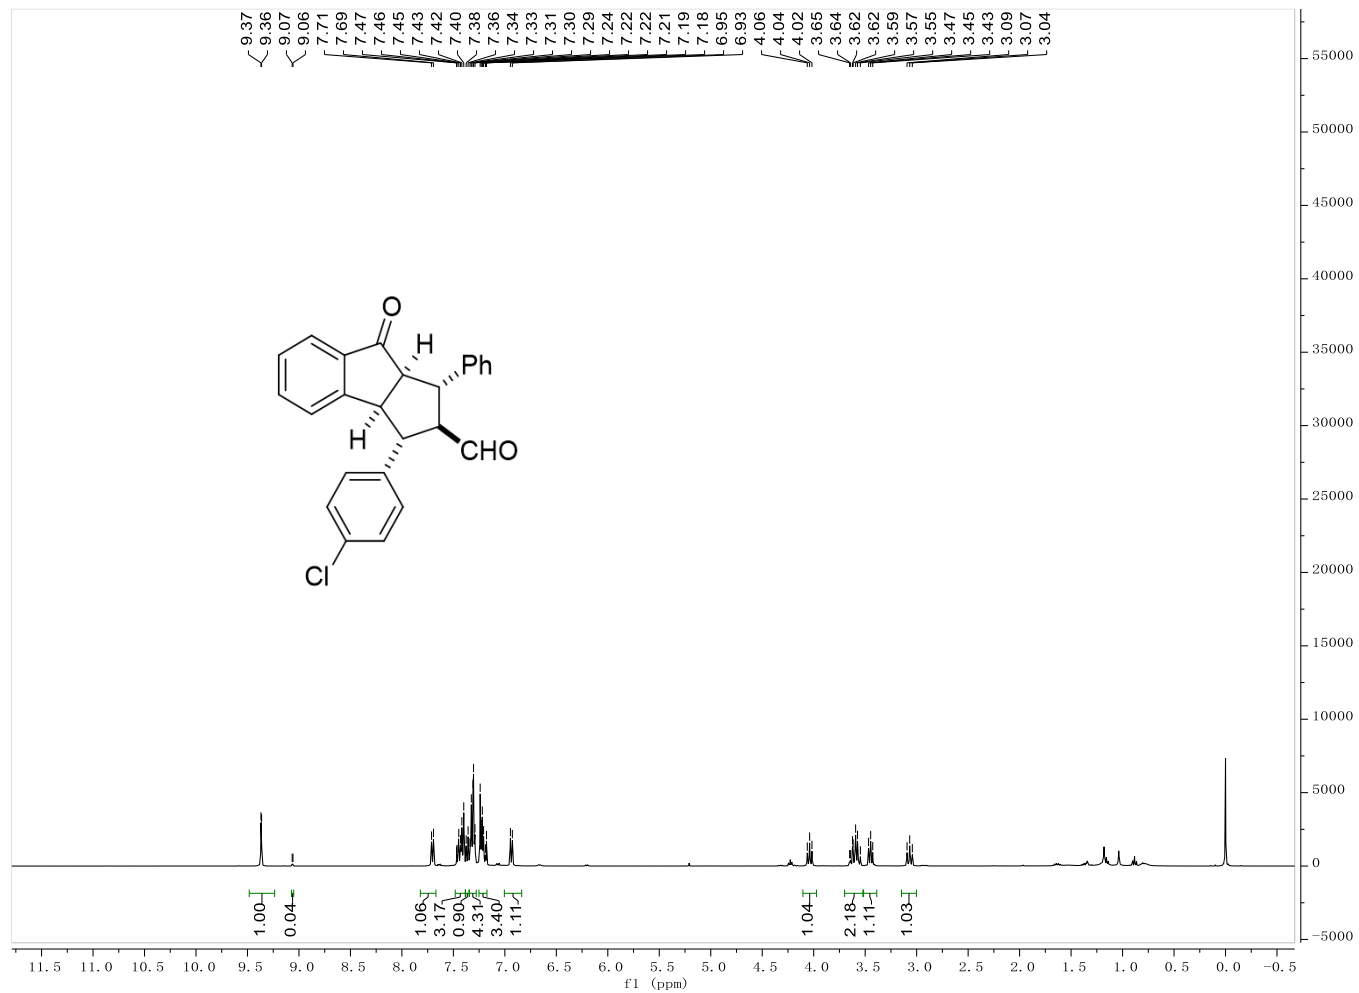

<sup>13</sup>C NMR spectrum of 3ad (125 MHz, DMSO-d<sub>6</sub>)

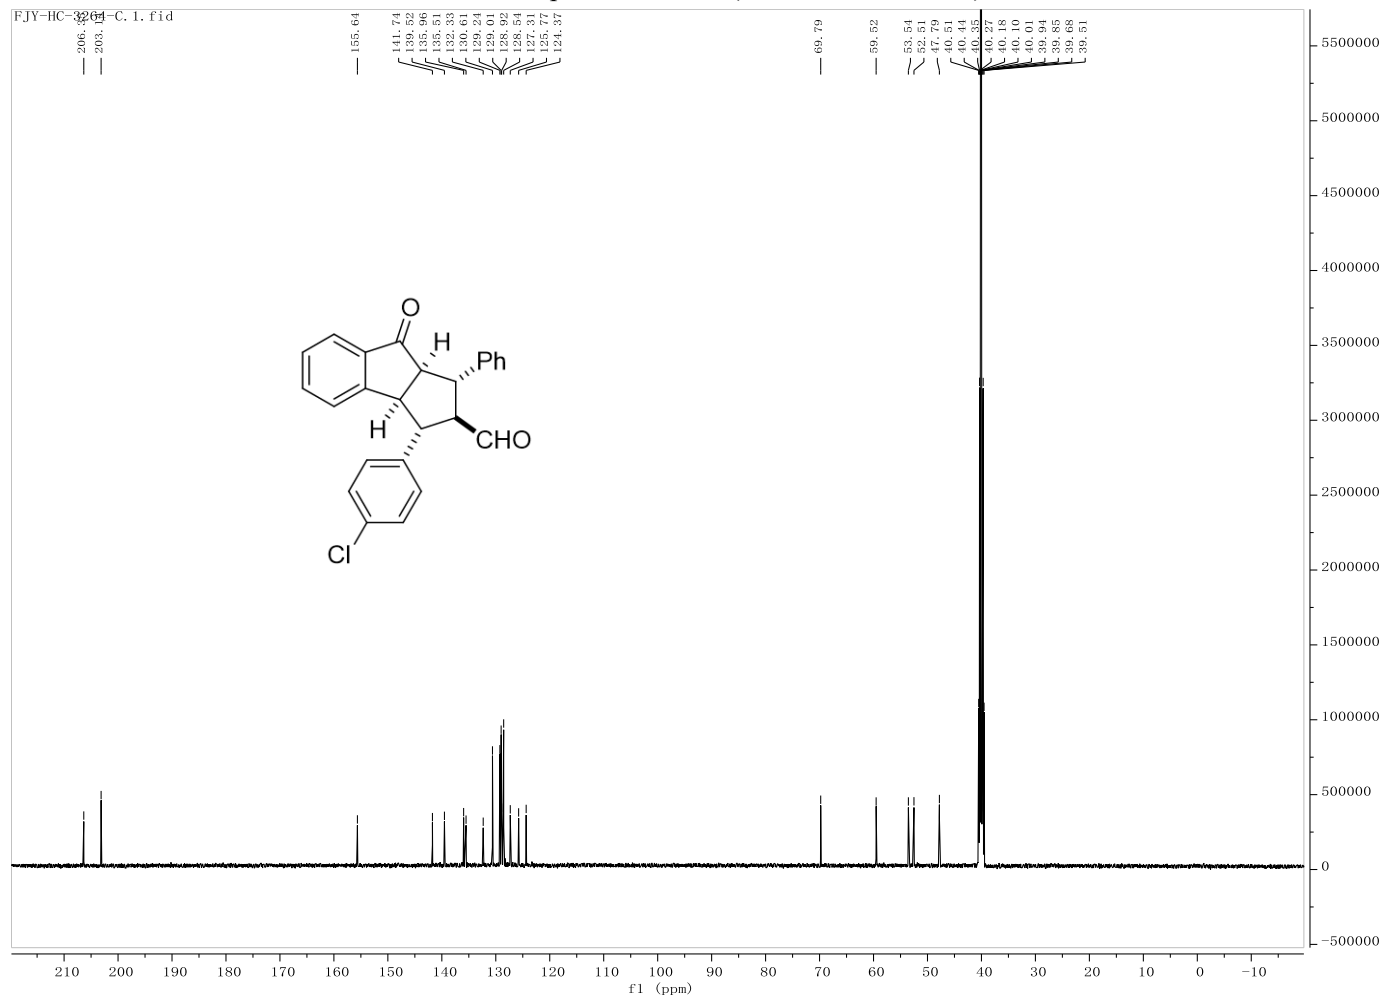

<sup>1</sup>H NMR spectrum of **3ae** (400 MHz, CDCl<sub>3</sub>)

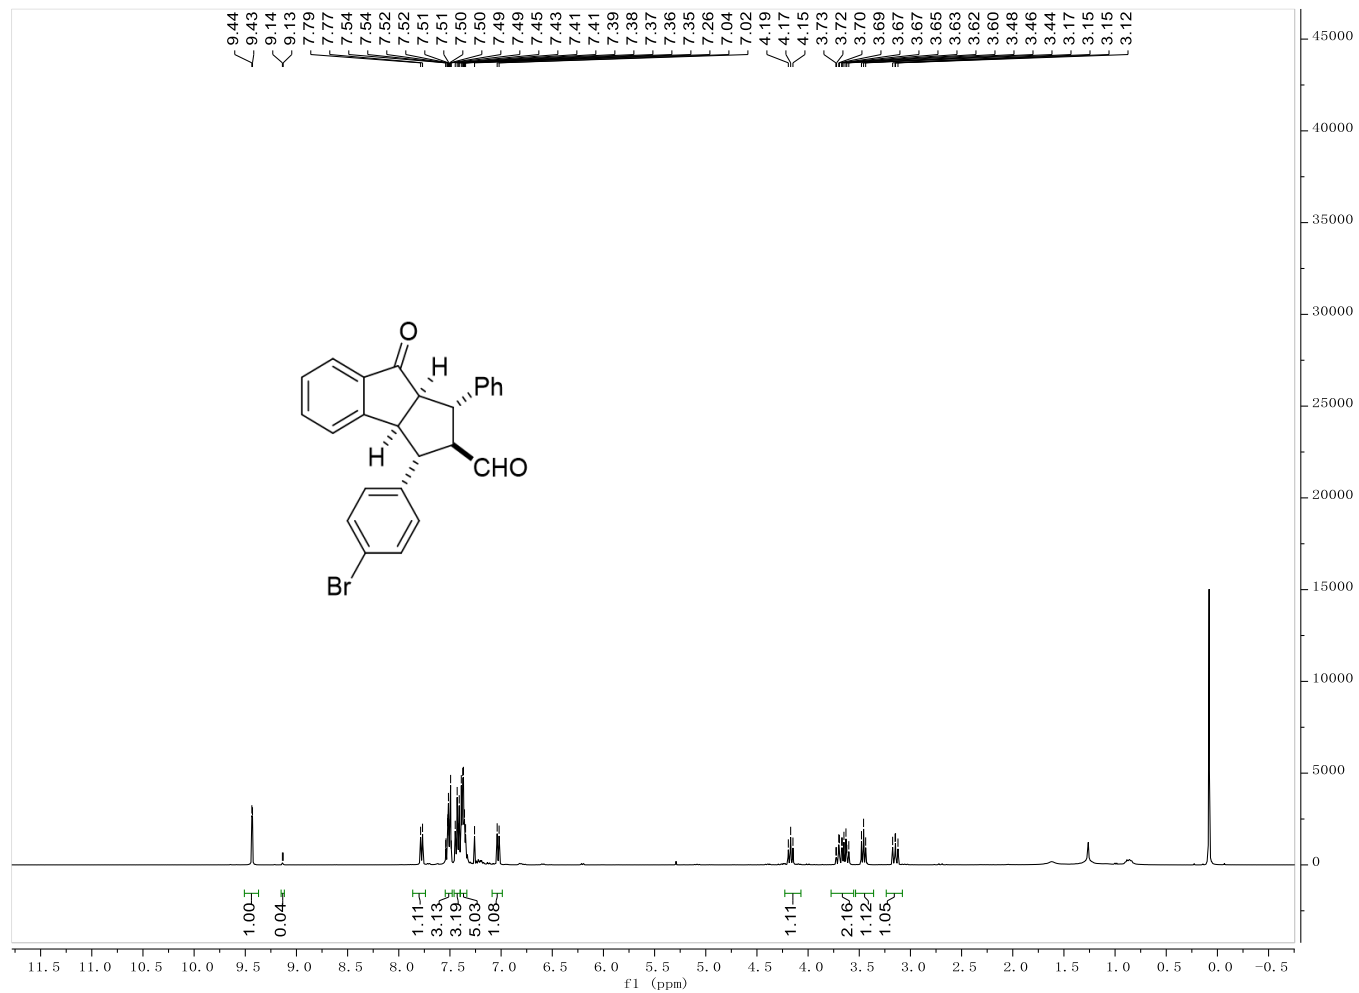



<sup>13</sup>C NMR spectrum of **3ae** (100 MHz, CDCl<sub>3</sub>)

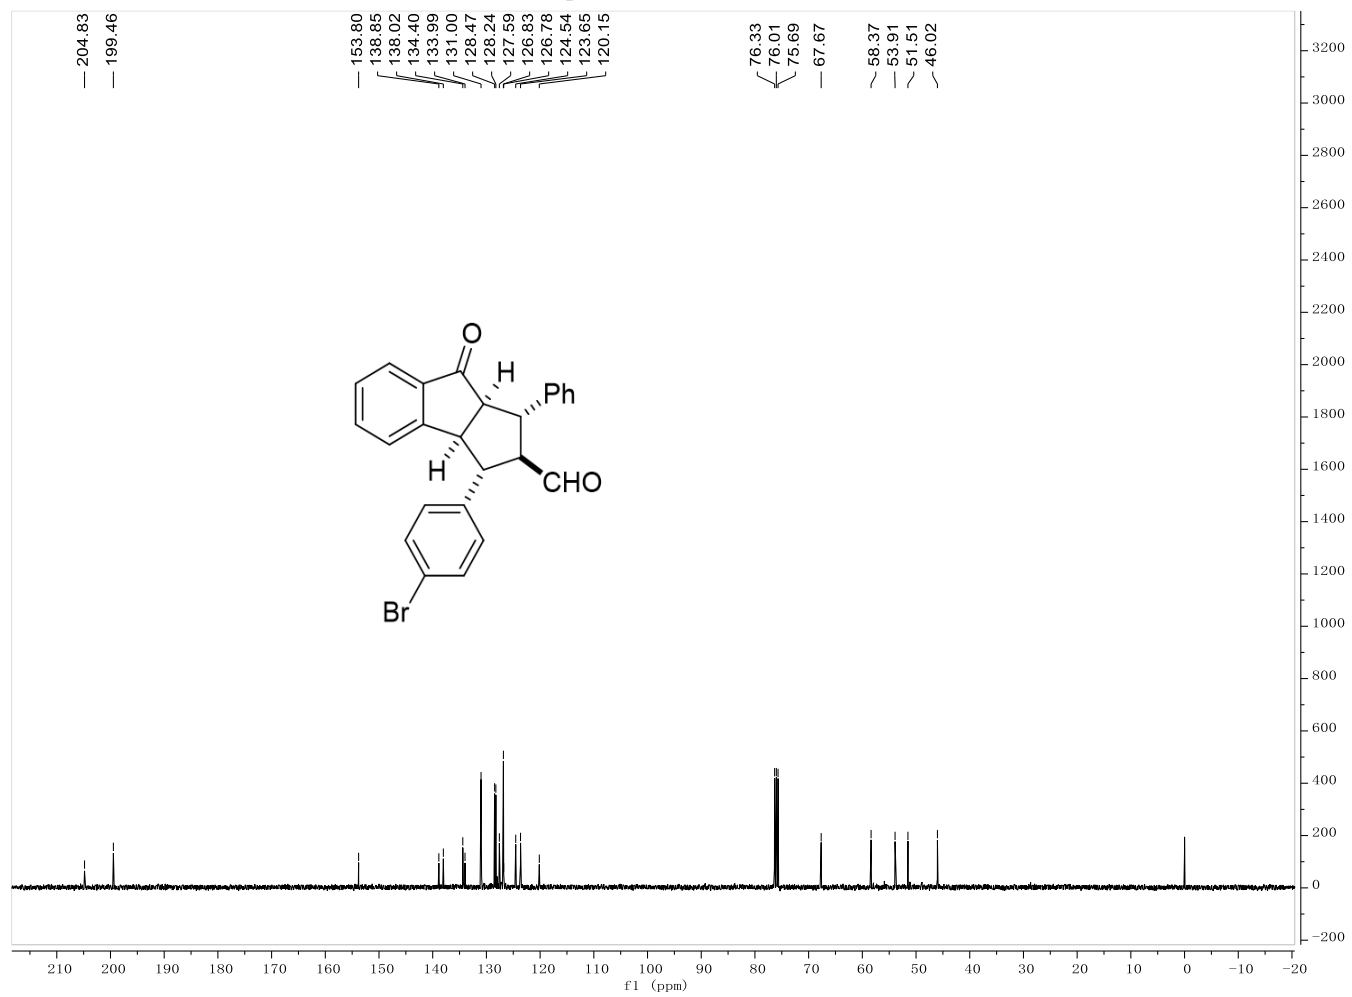

<sup>1</sup>H NMR spectrum of **3af** (400 MHz, CDCl<sub>3</sub>)

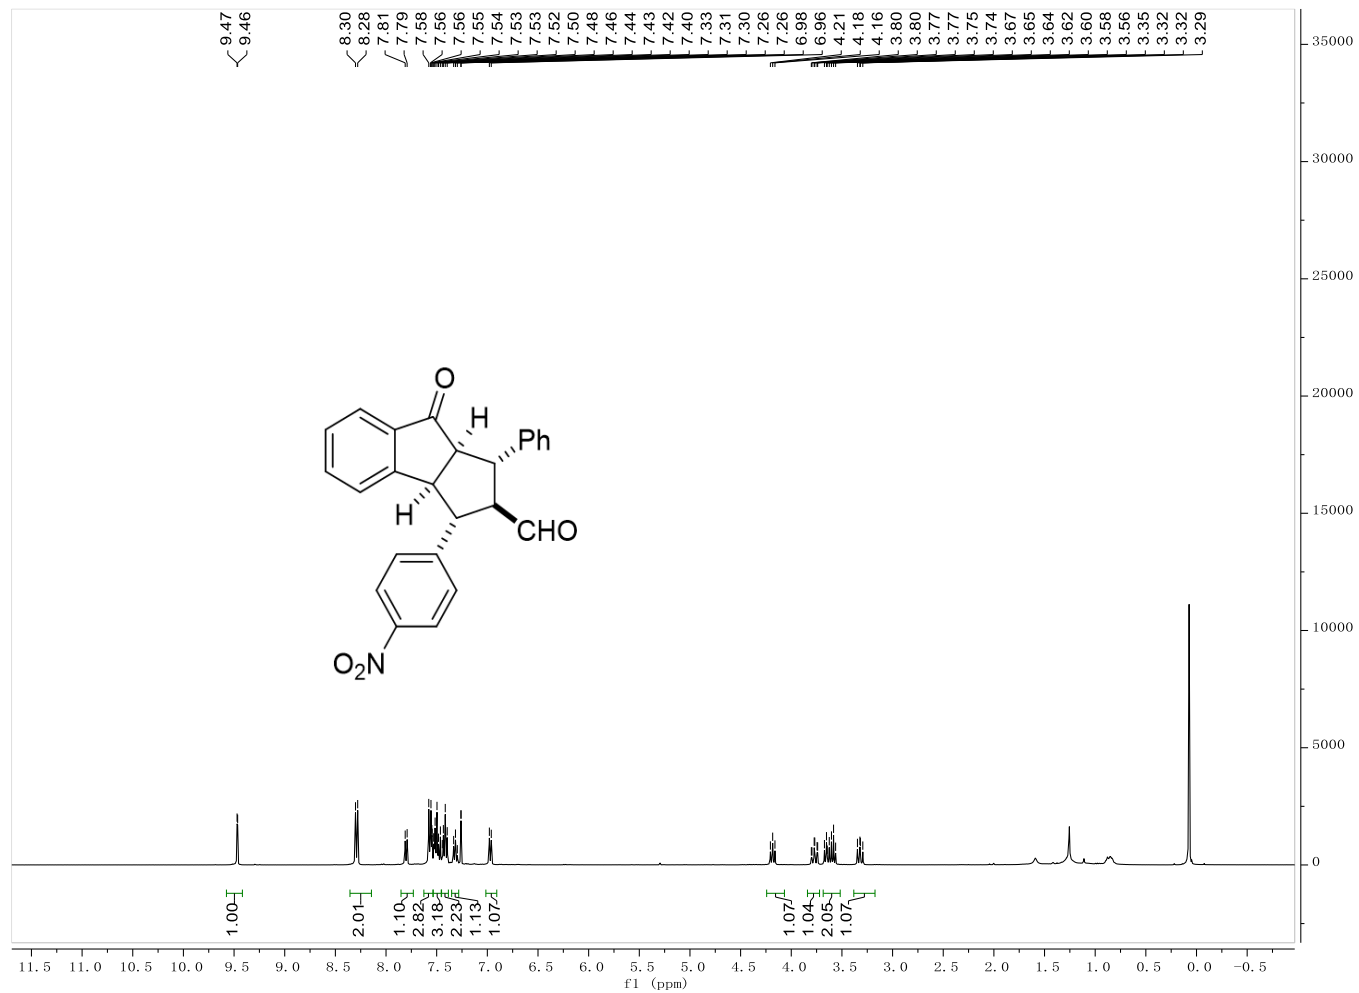

<sup>13</sup>C NMR spectrum of **3af** (100 MHz, CDCl<sub>3</sub>)

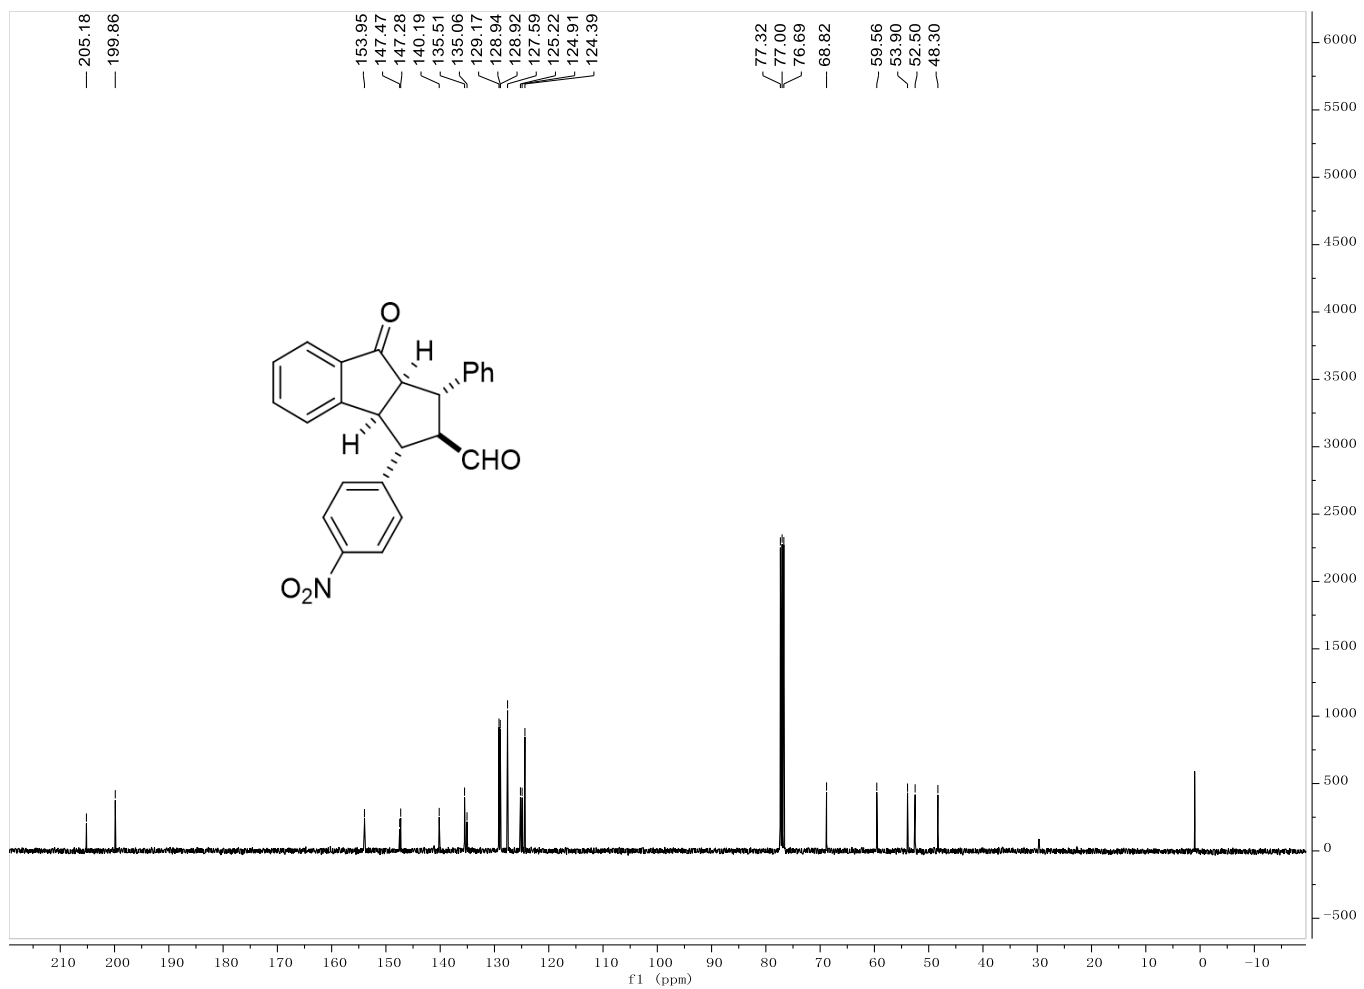

<sup>1</sup>H NMR spectrum of **3ag** (400 MHz, CDCl<sub>3</sub>)

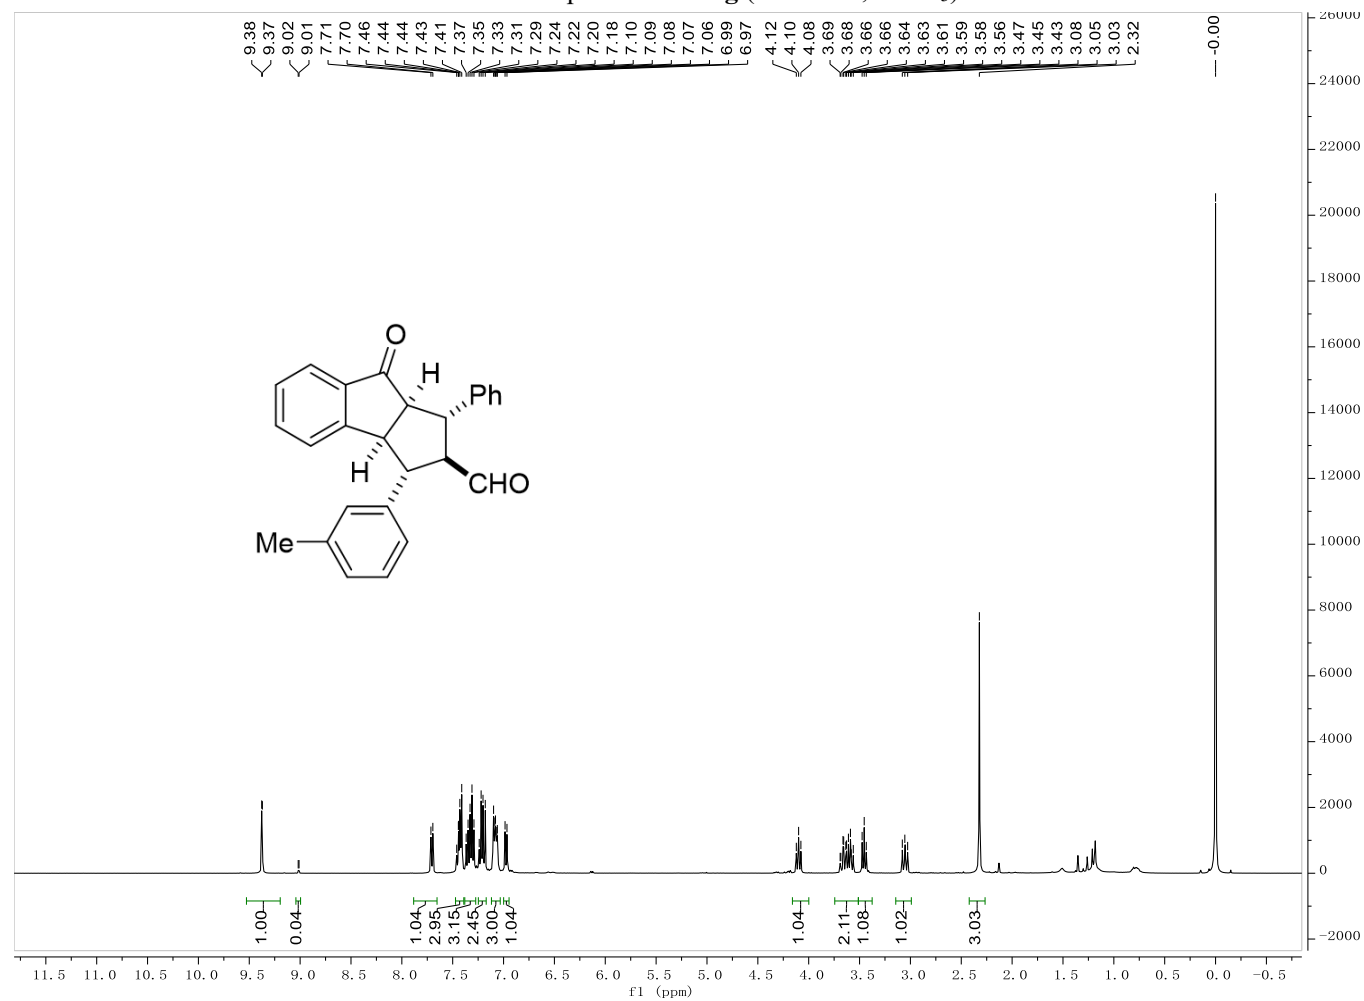

<sup>13</sup>C NMR spectrum of **3ag** (100 MHz, CDCl<sub>3</sub>)

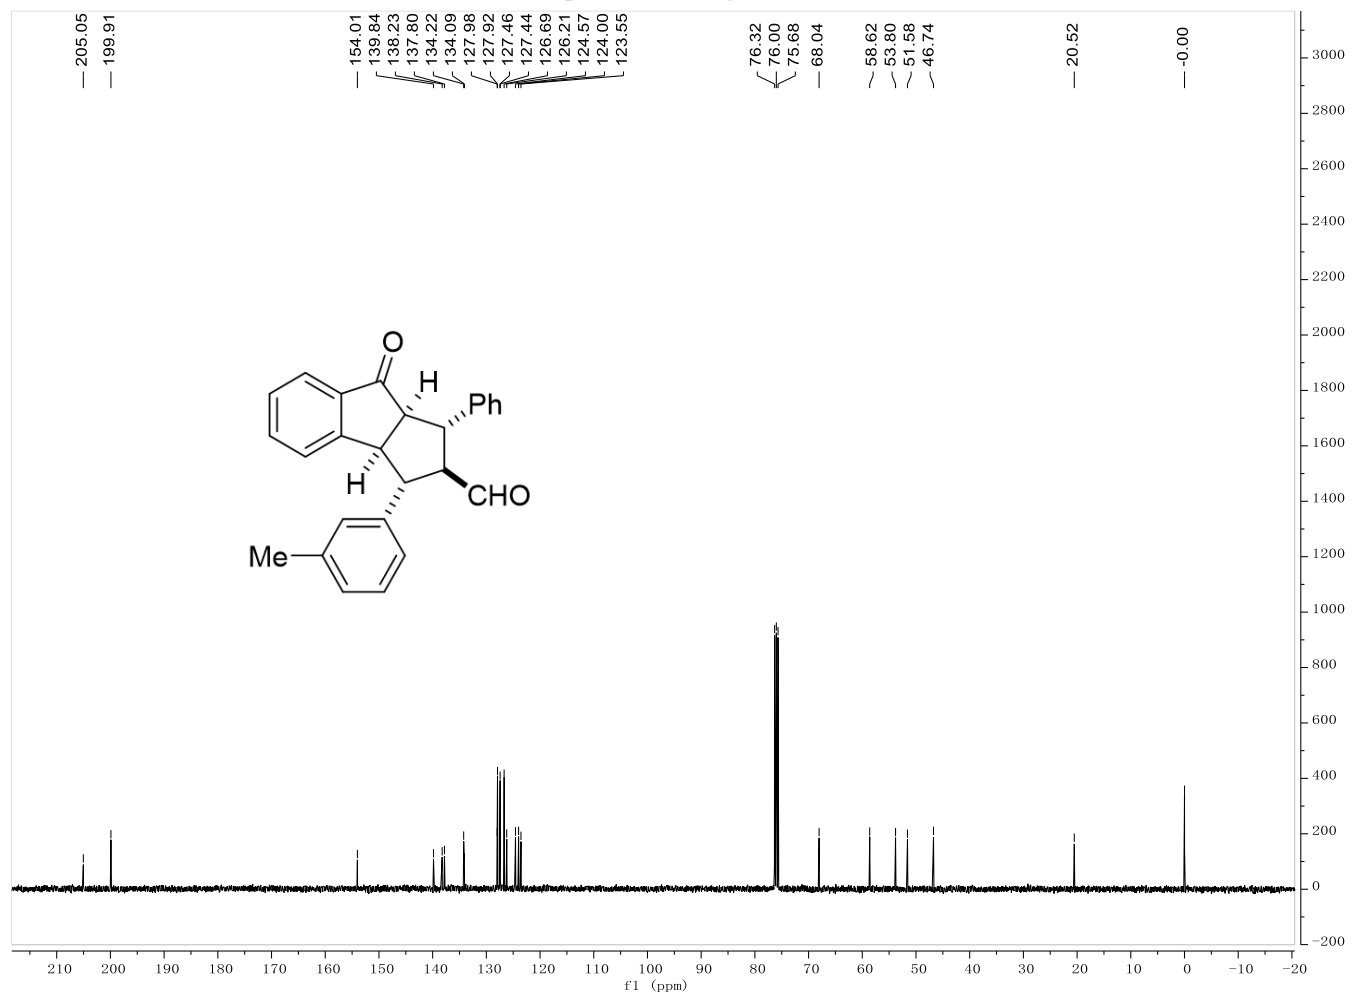

<sup>1</sup>H NMR spectrum of **3ah** (400 MHz, CDCl<sub>3</sub>)

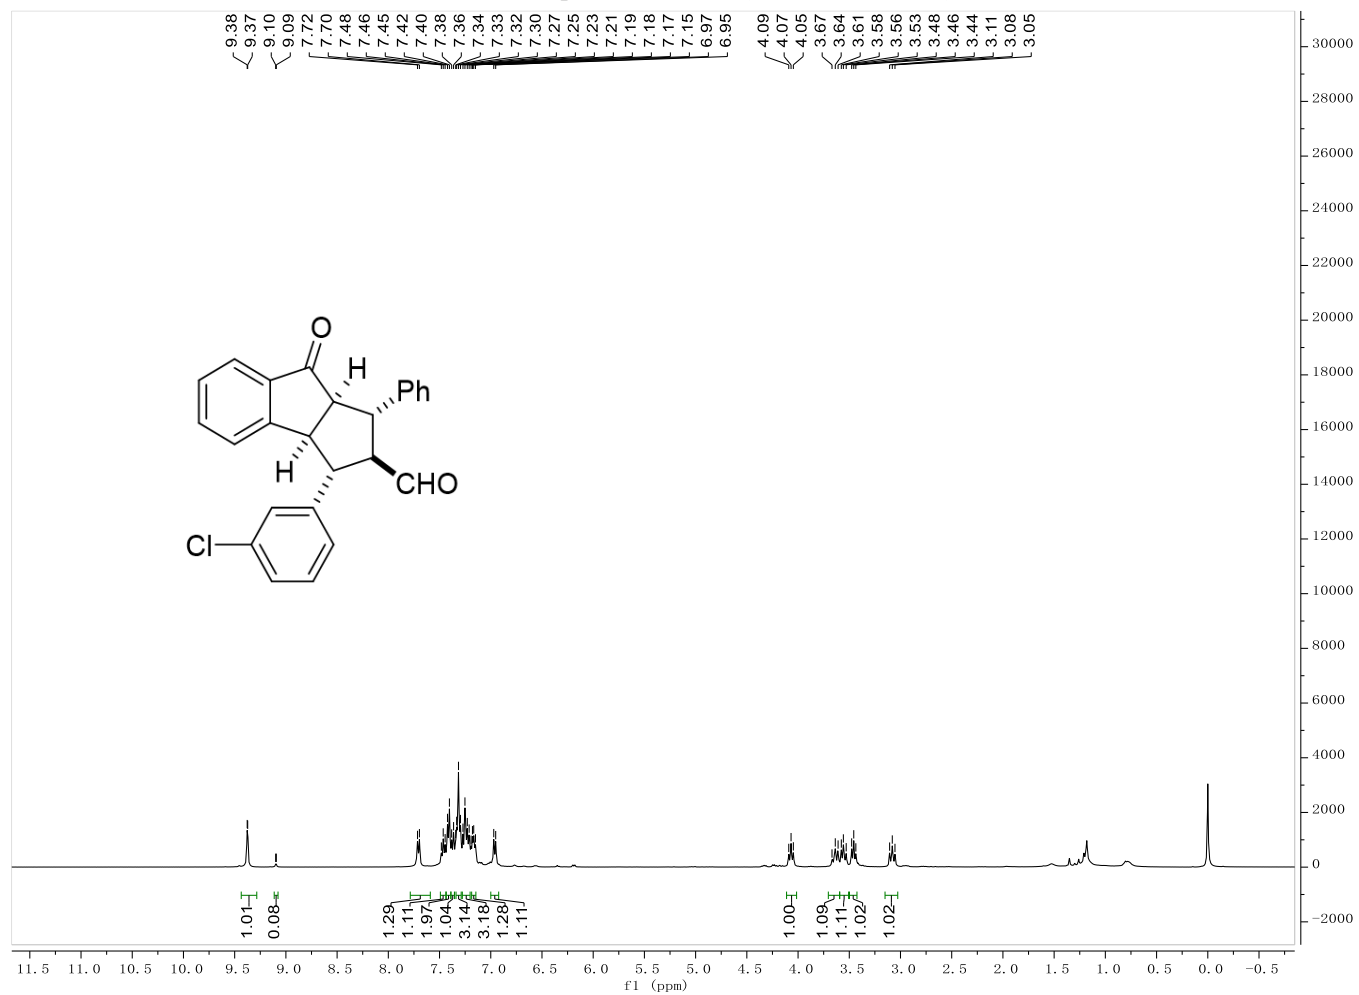

<sup>13</sup>C NMR spectrum of **3ah** (100 MHz, CDCl<sub>3</sub>)

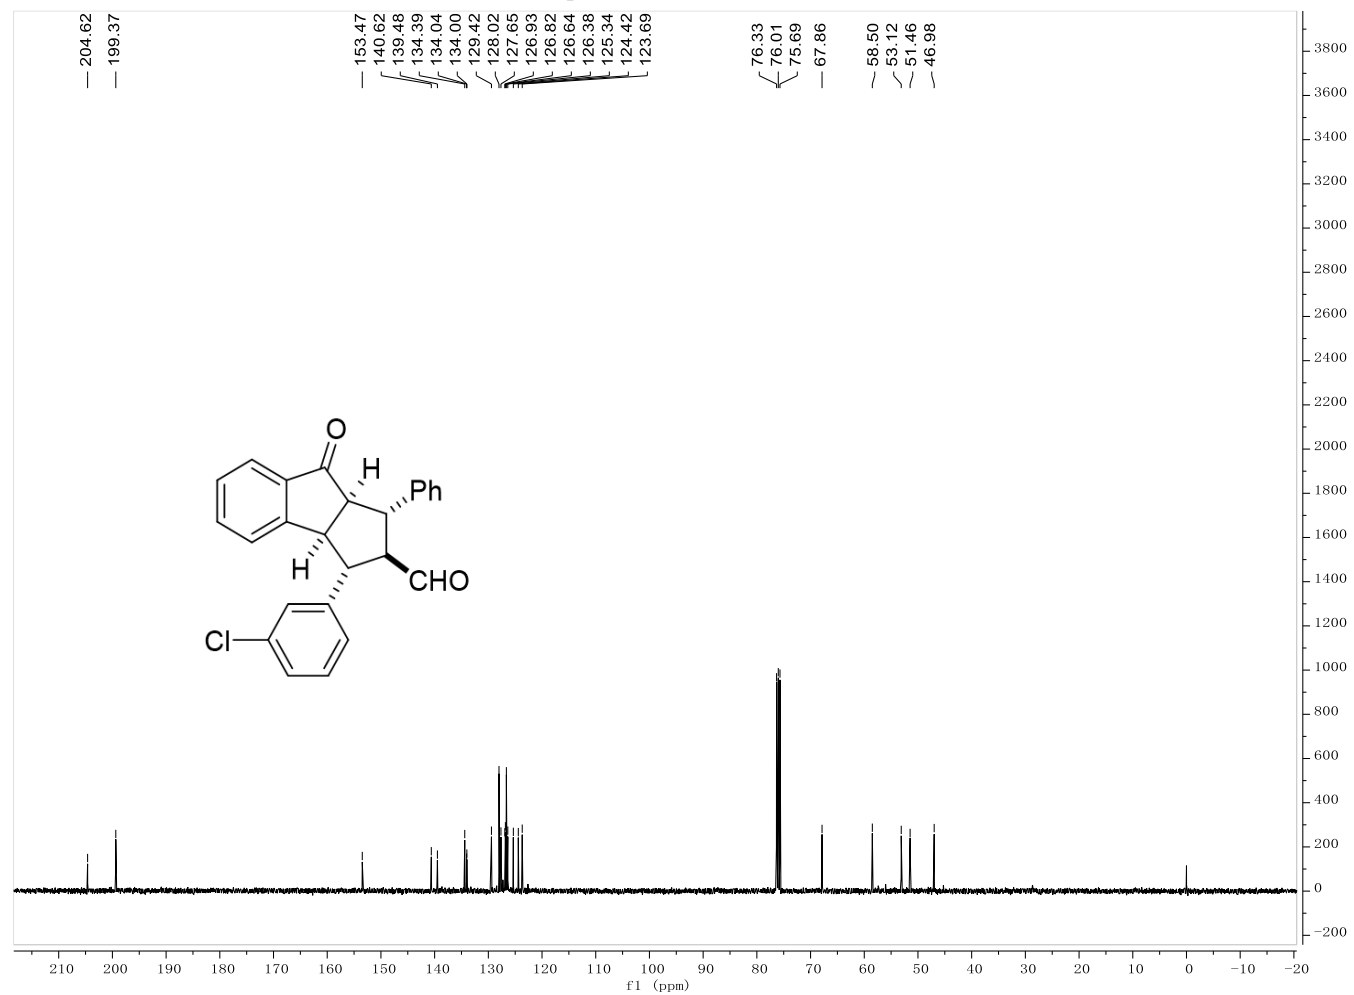

<sup>1</sup>H NMR spectrum of **3ai** (40s0 MHz, CDCl<sub>3</sub>)

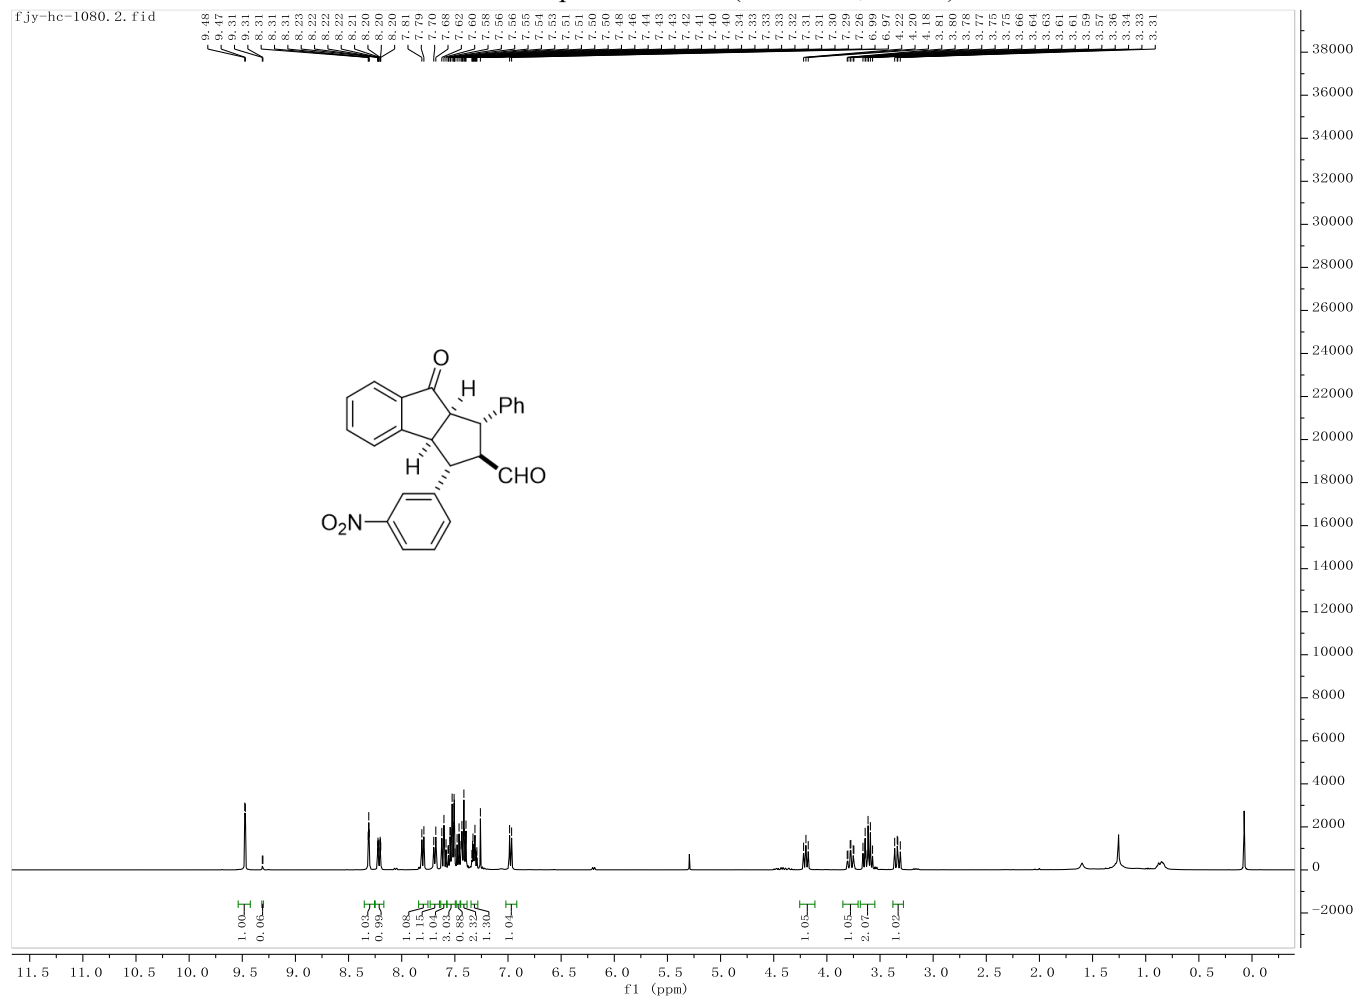



<sup>13</sup>C NMR spectrum of **3ai** (100 MHz, CDCl<sub>3</sub>)

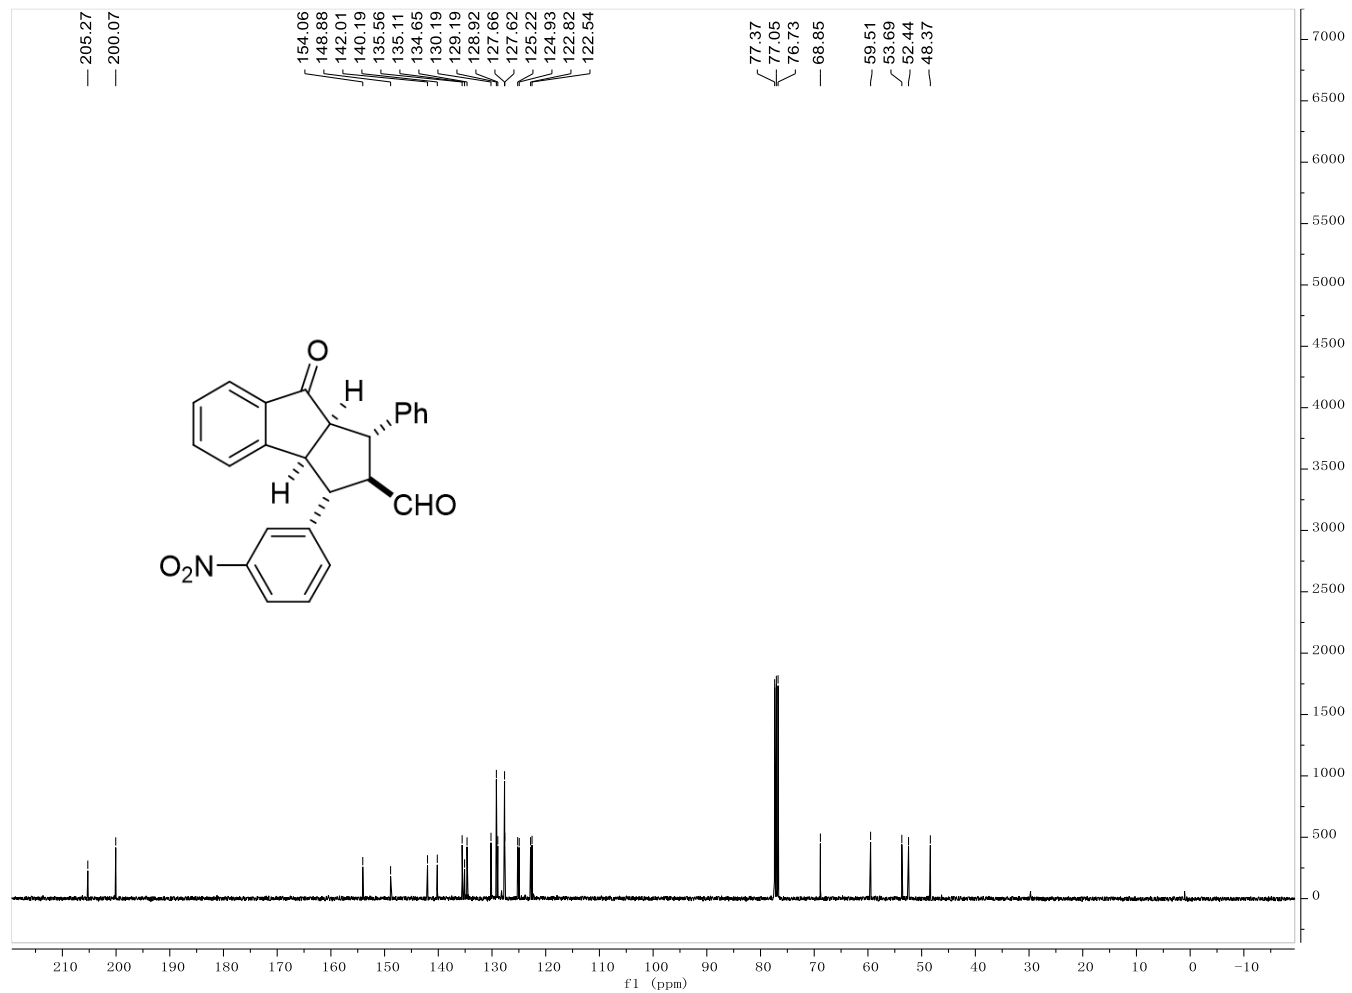

<sup>1</sup>H NMR spectrum of **3aj** (400 MHz, CDCl<sub>3</sub>)

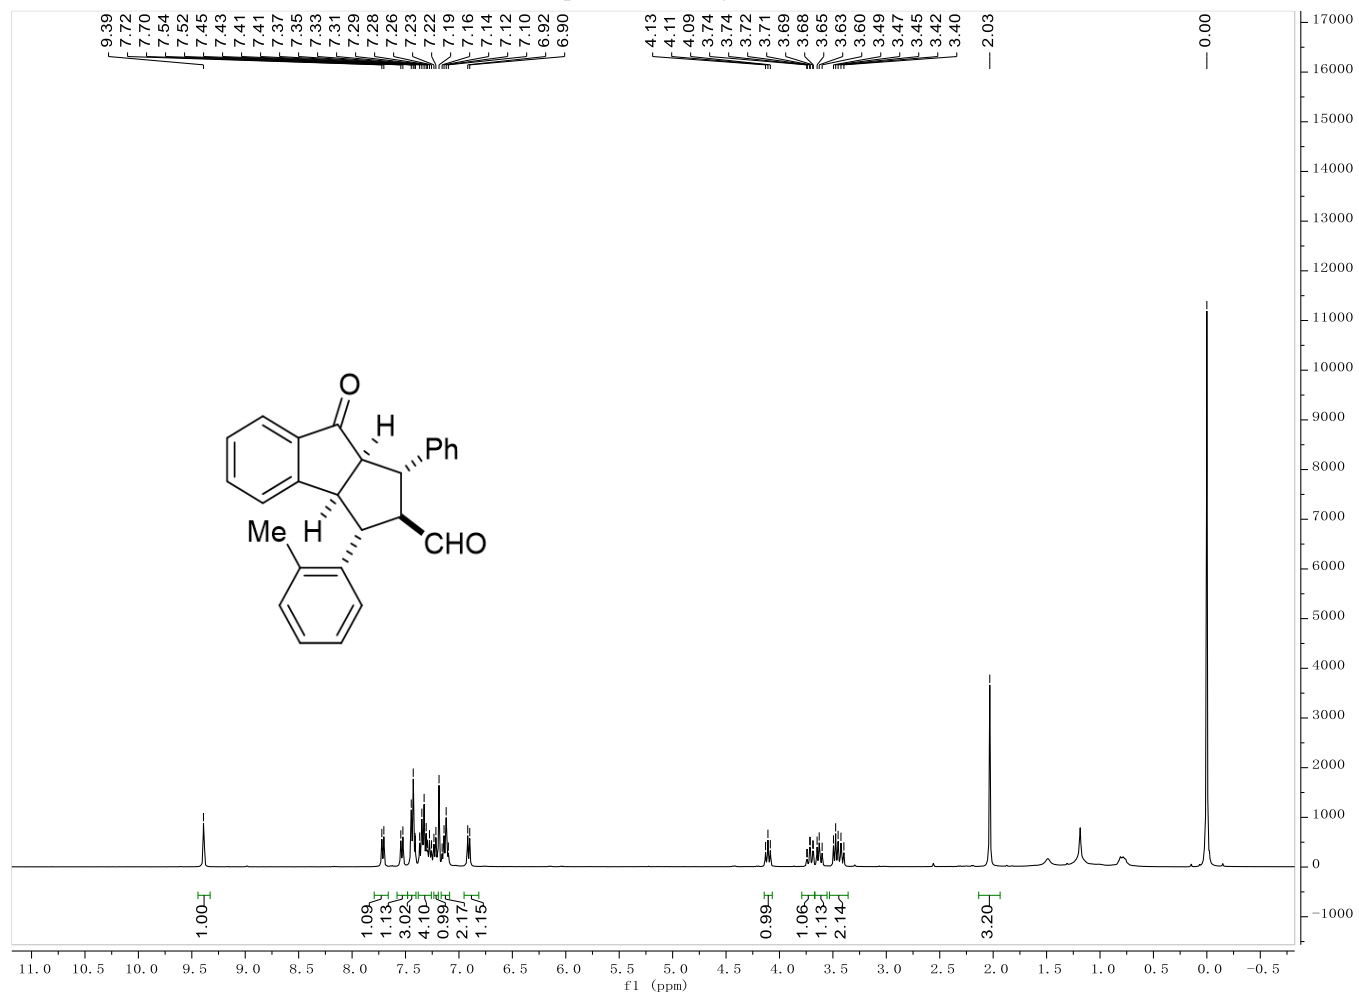

<sup>13</sup>C NMR spectrum of **3aj** (100 MHz, CDCl<sub>3</sub>)

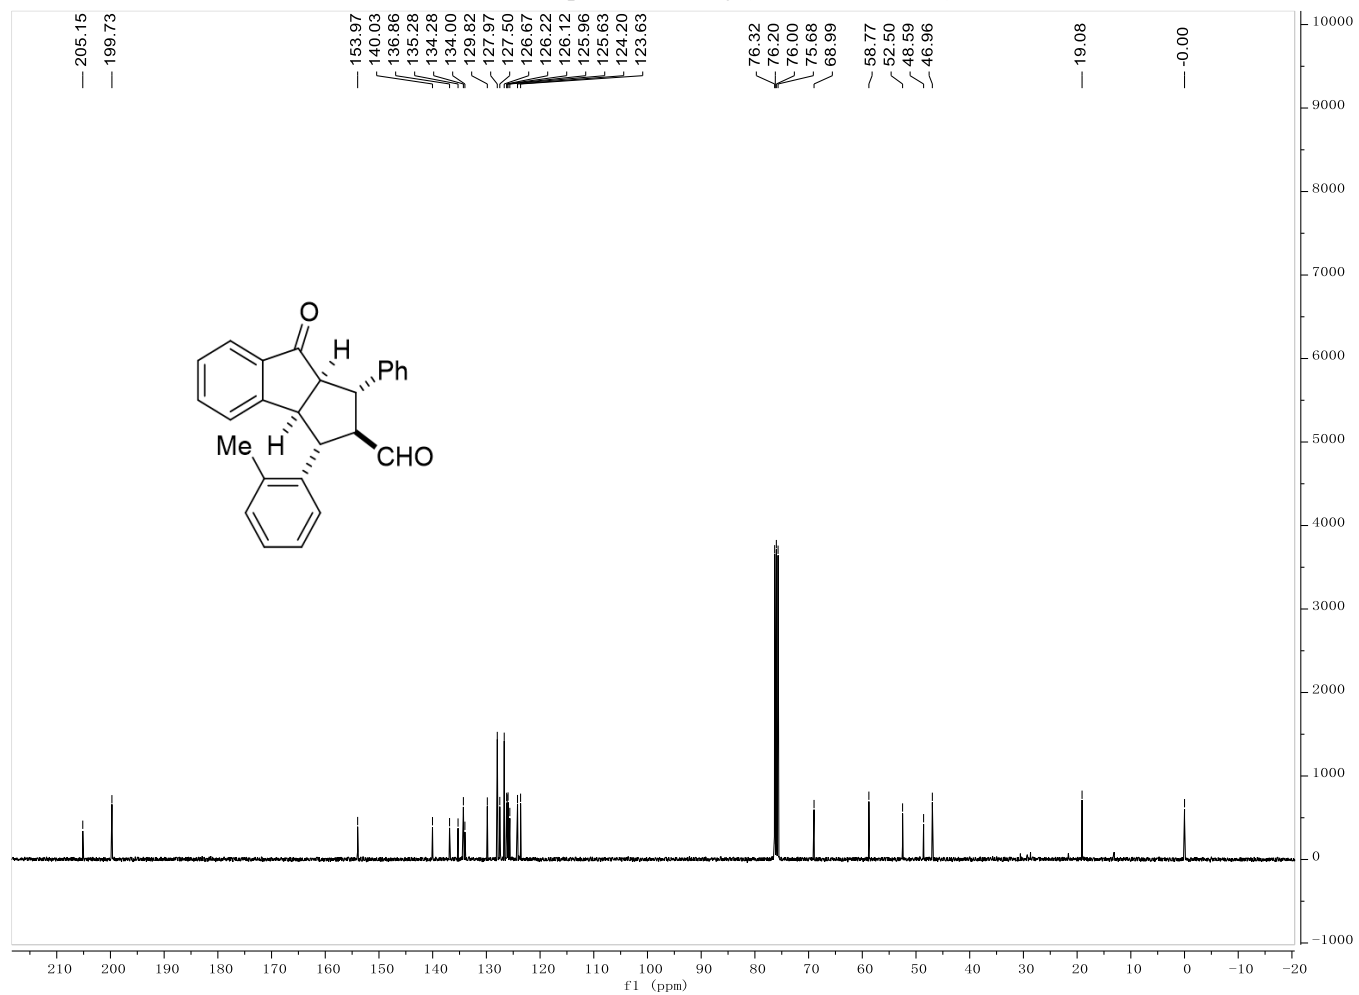

<sup>1</sup>H NMR spectrum of **3ak** (400 MHz, CDCl<sub>3</sub>)

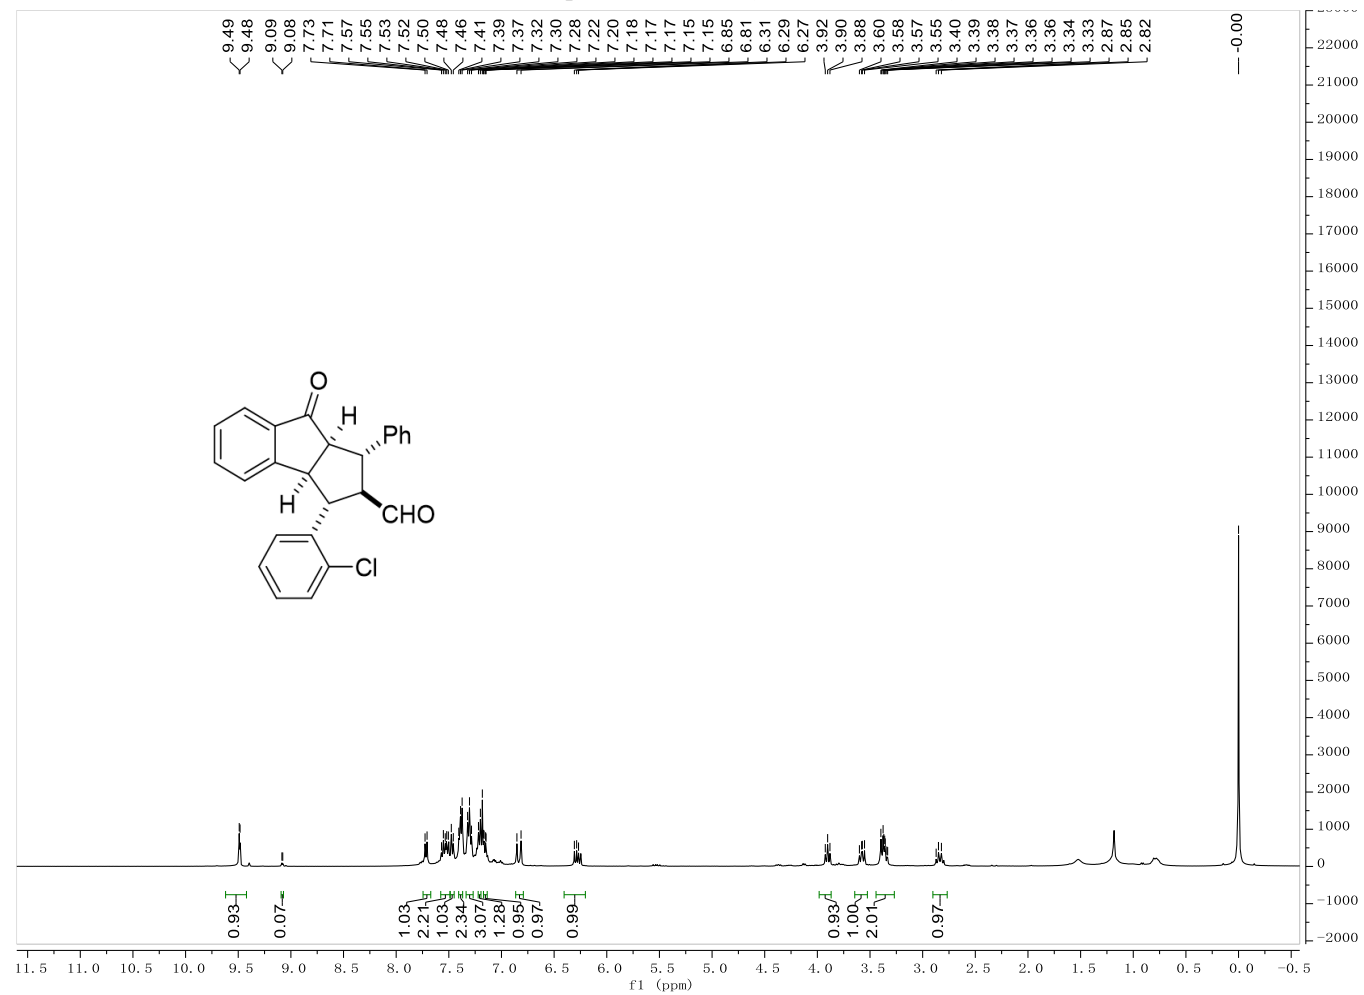

<sup>13</sup>C NMR spectrum of **3ak** (100 MHz, CDCl<sub>3</sub>)

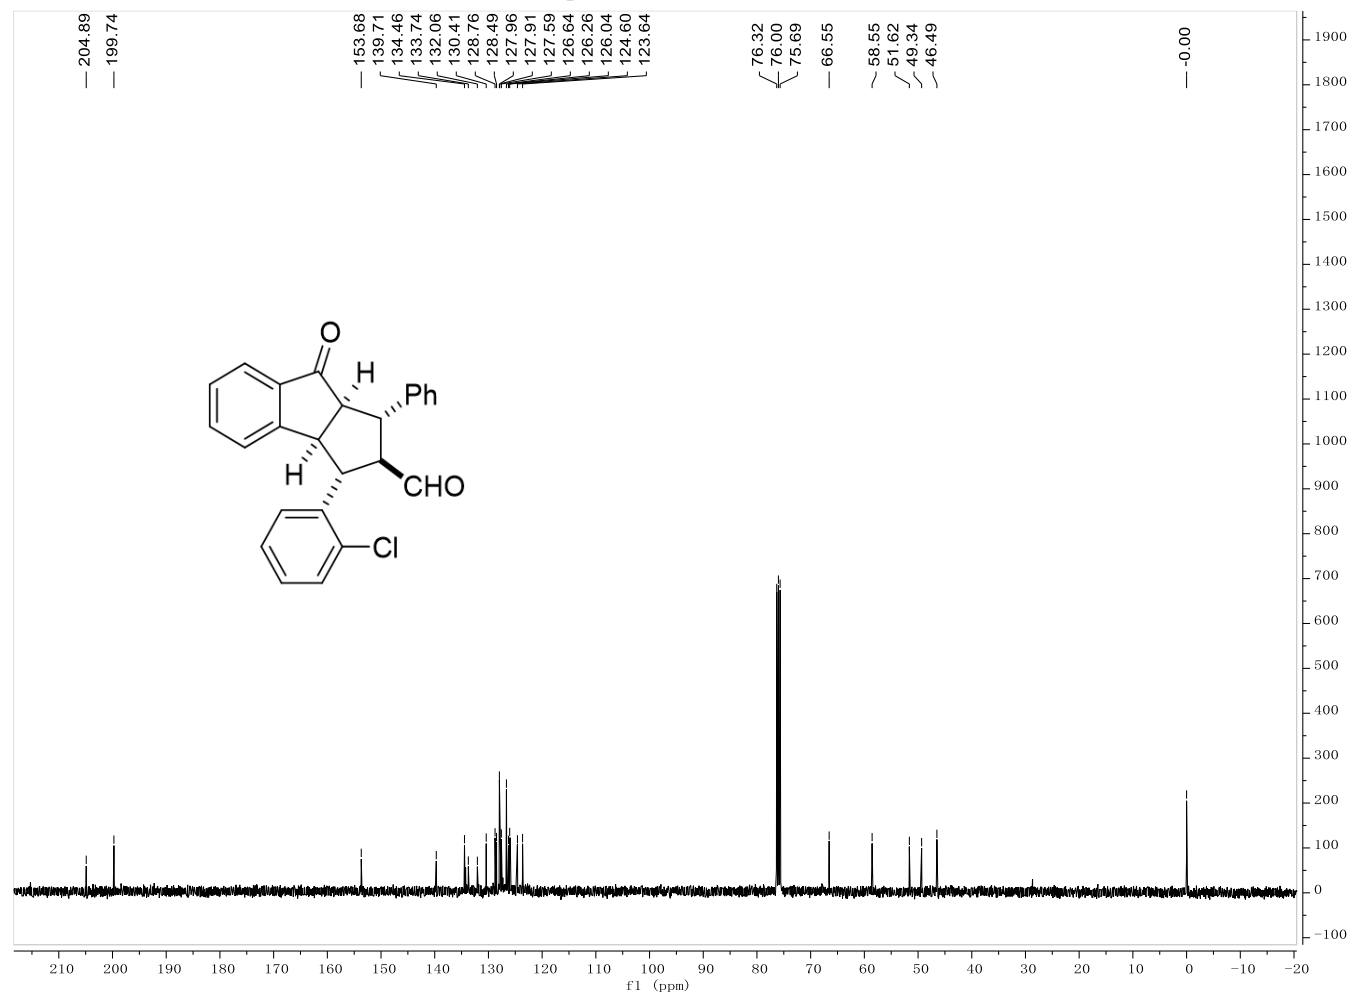

<sup>1</sup>H NMR spectrum of **3al** (400 MHz, CDCl<sub>3</sub>)

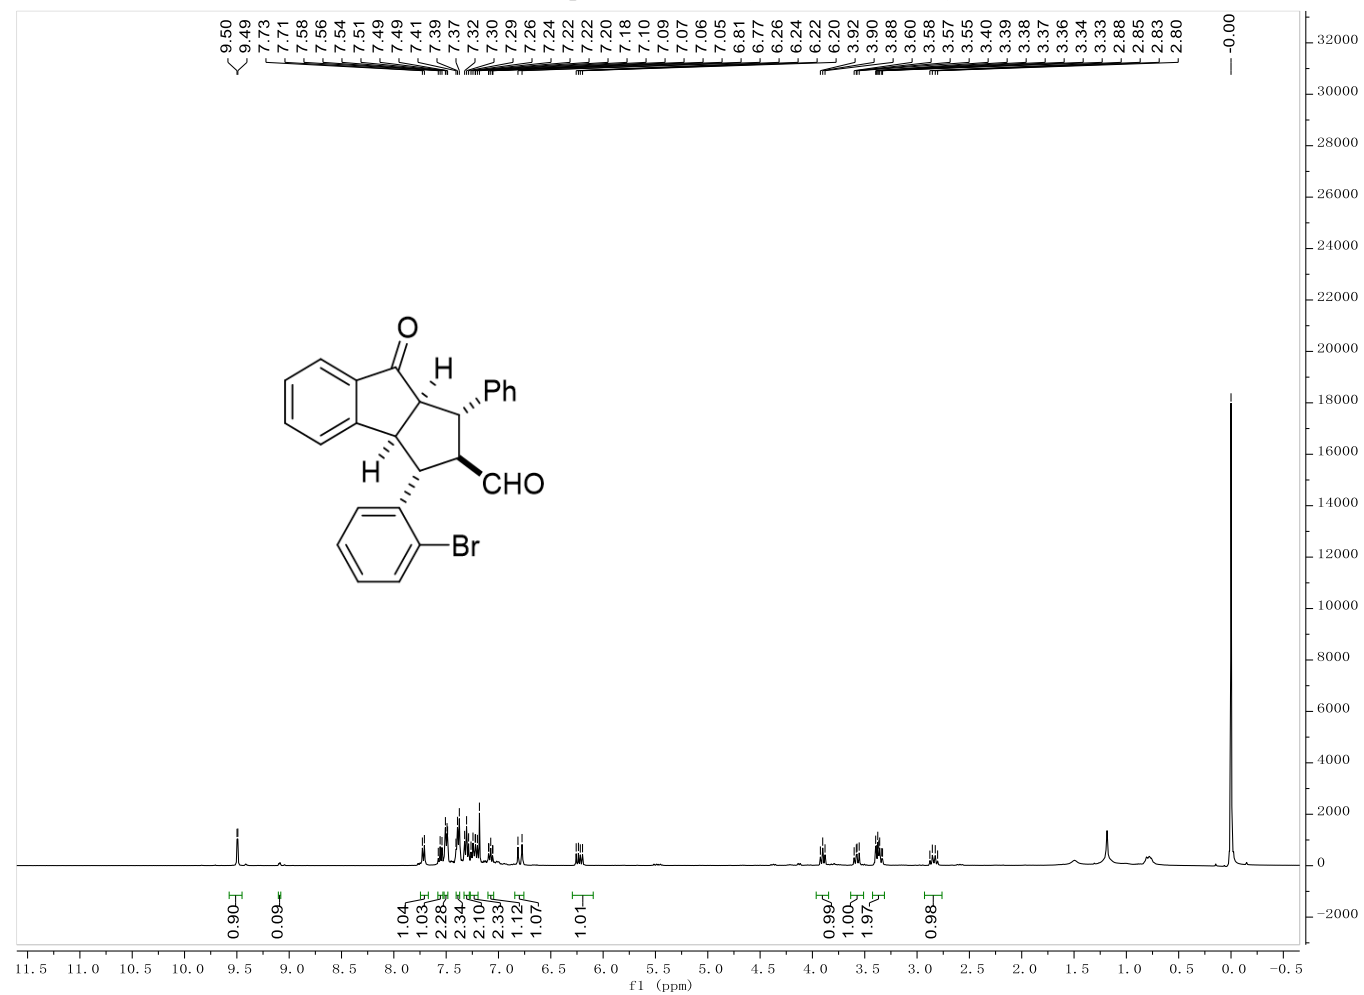

<sup>13</sup>C NMR spectrum of **3al** (100 MHz, CDCl<sub>3</sub>)

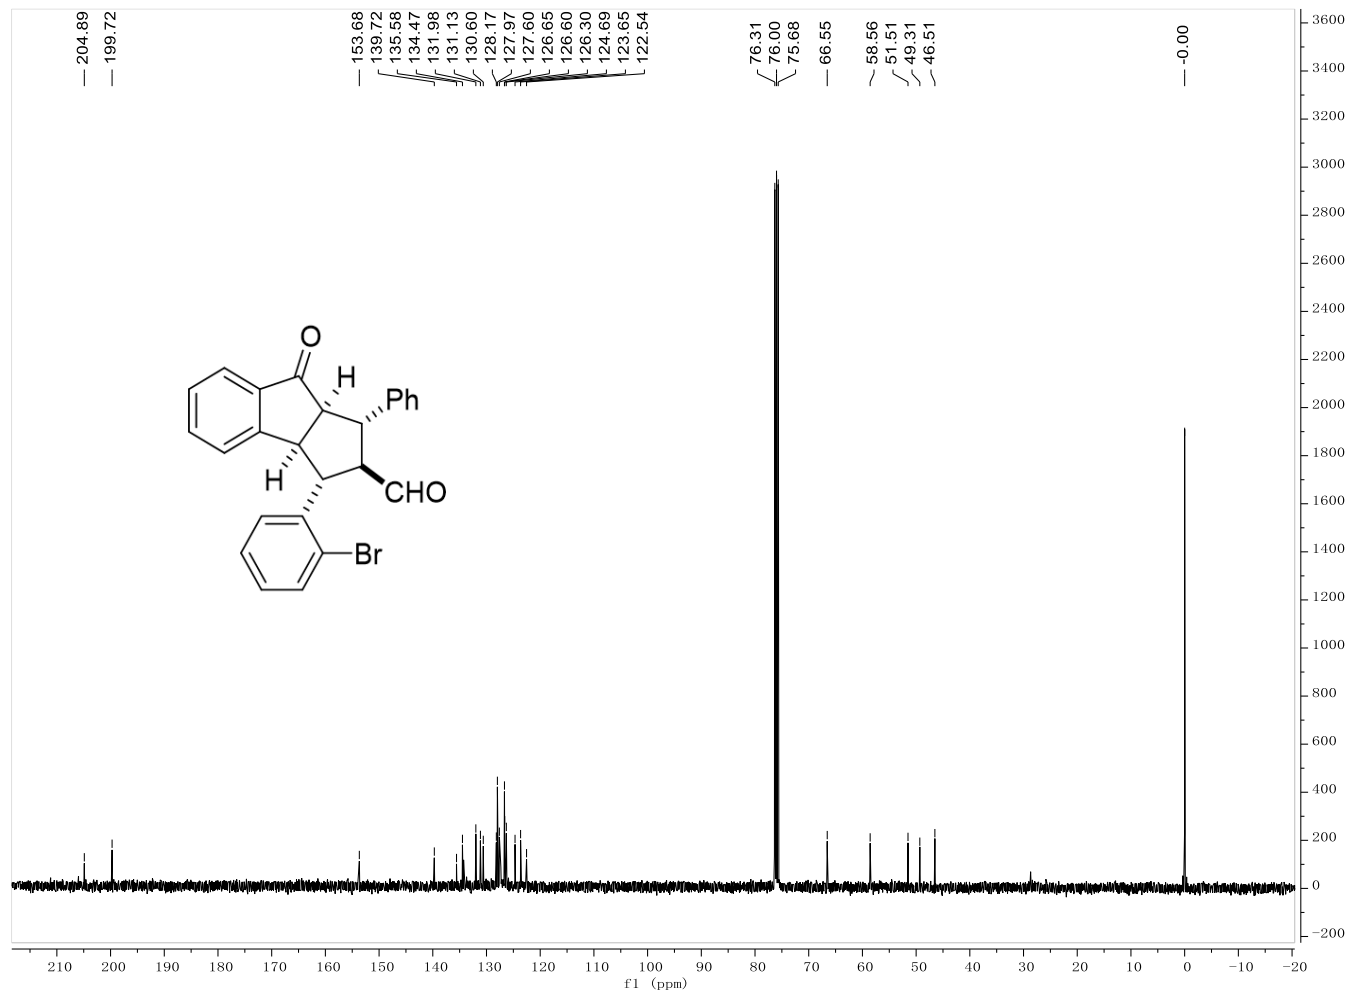

<sup>1</sup>H NMR spectrum of **5a** (500 MHz, CDCl<sub>3</sub>)

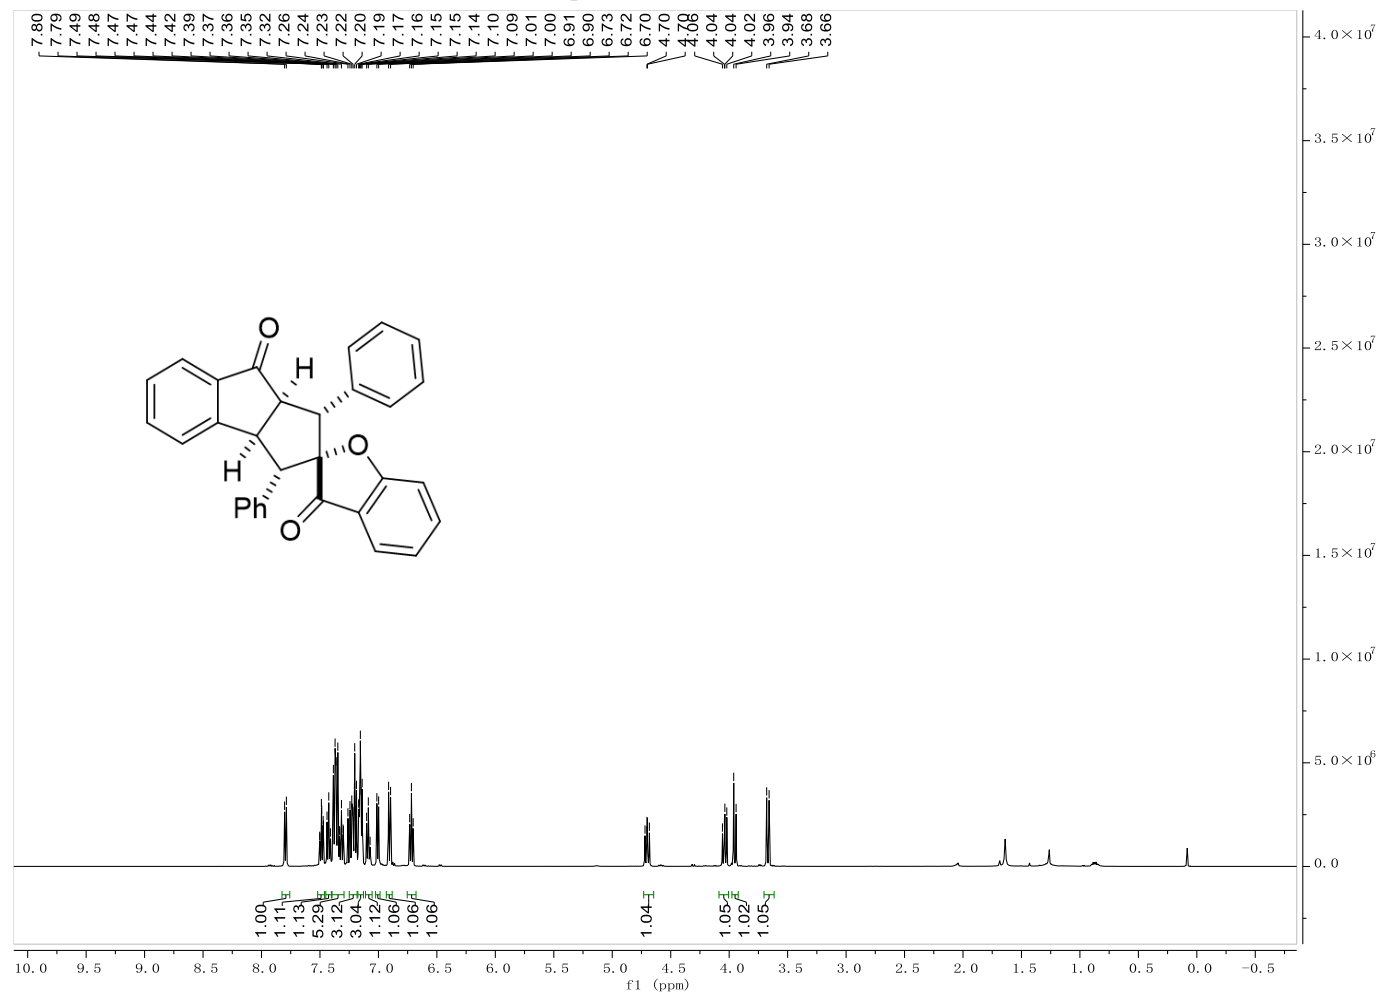



<sup>13</sup>C NMR spectrum of **5a** (125 MHz, CDCl<sub>3</sub>)

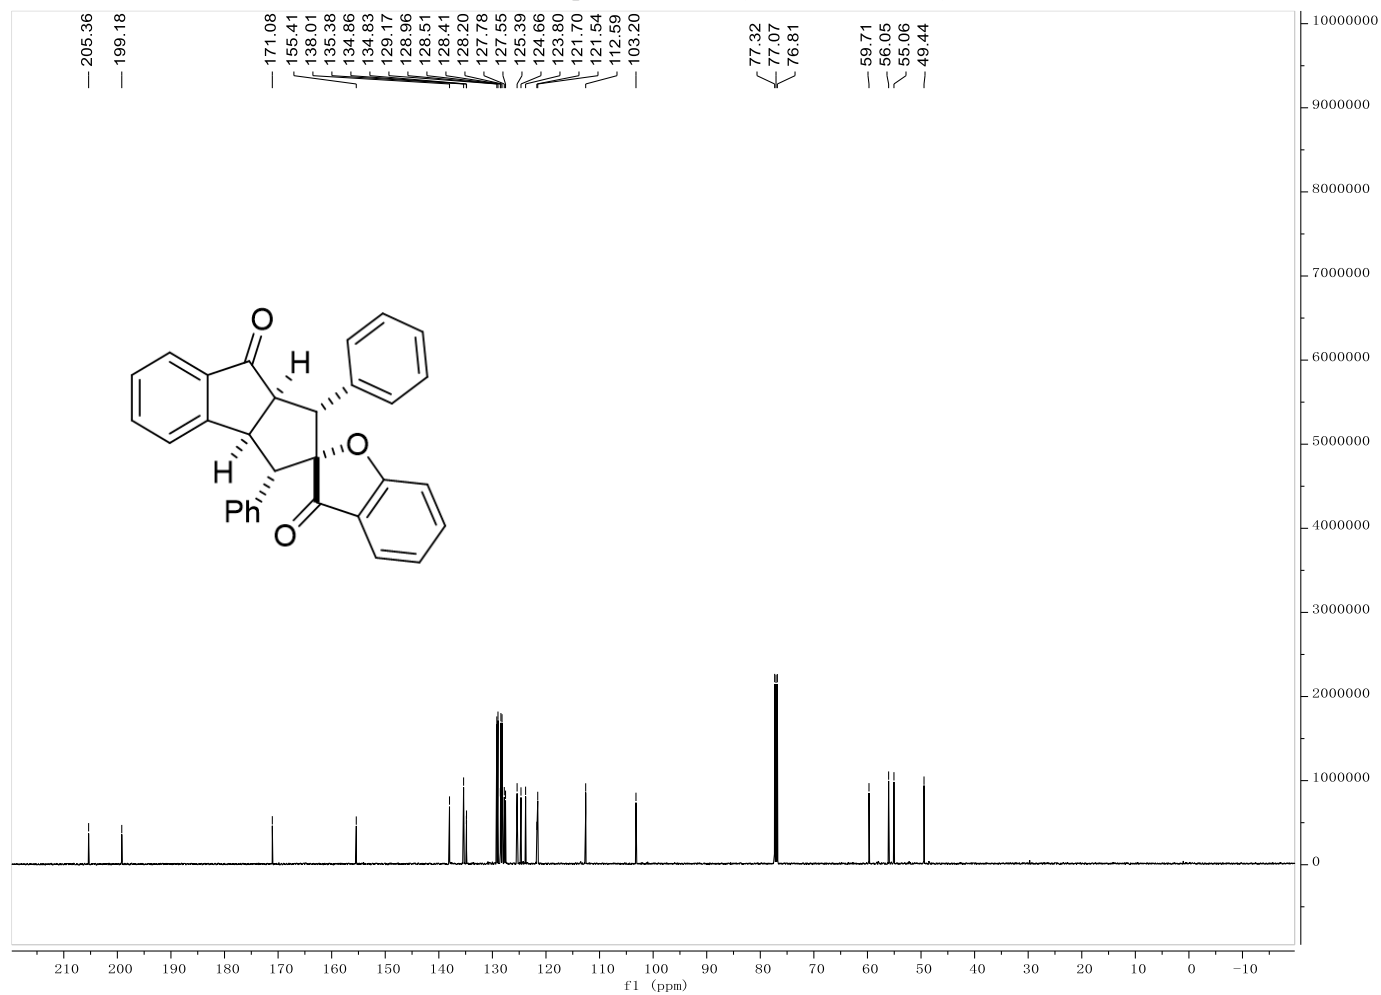

<sup>1</sup>H NMR spectrum of **5b** (500 MHz, DMSO-*d*<sub>6</sub>)

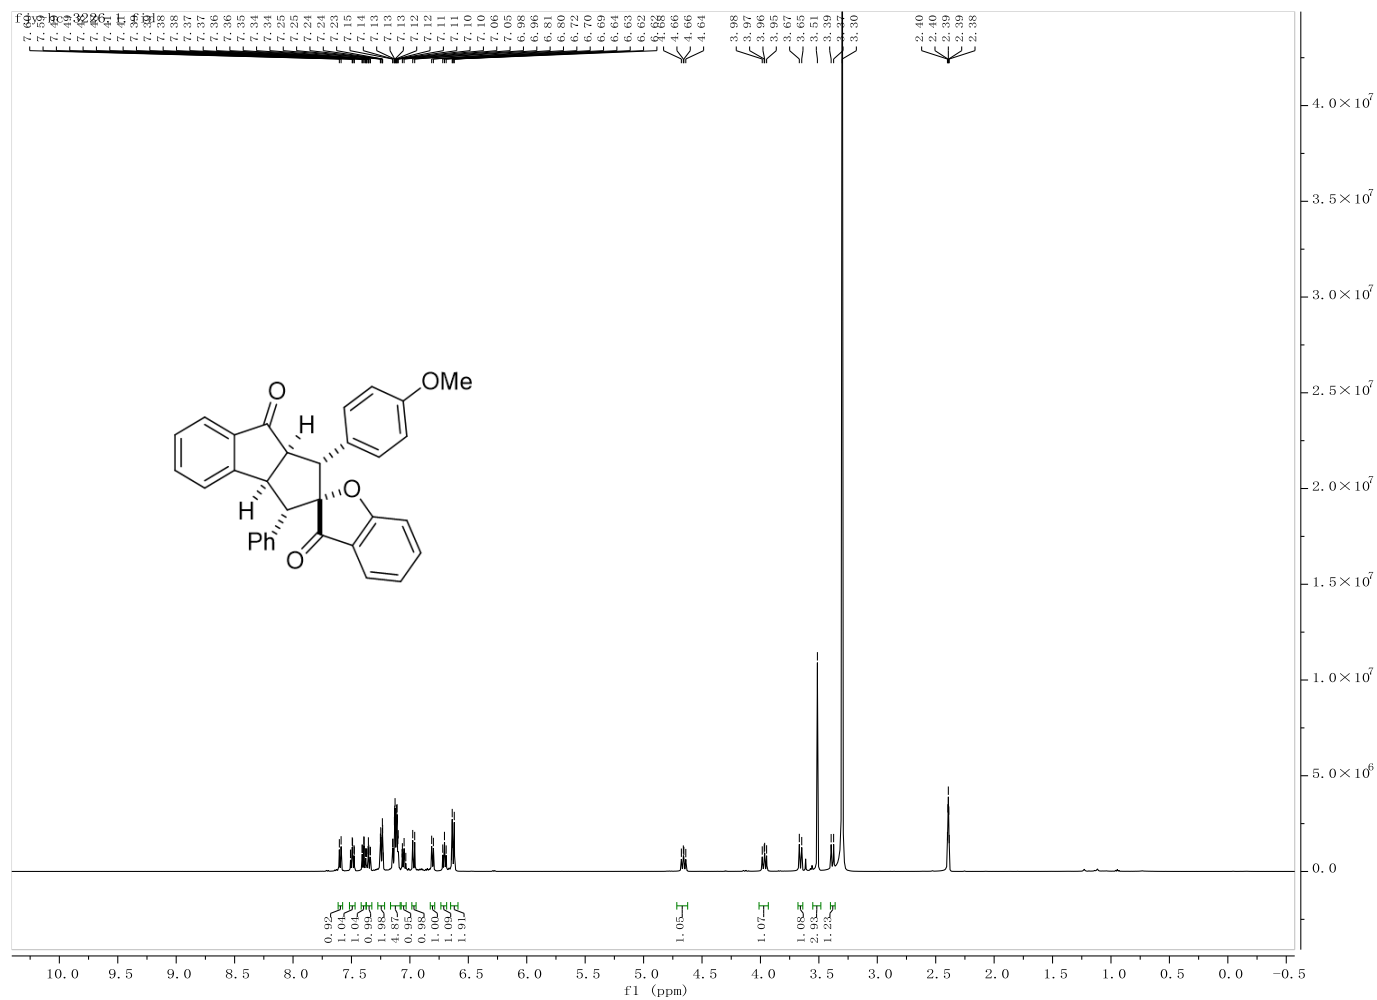

<sup>13</sup>C NMR spectrum of **5b** (125 MHz, DMSO-*d*<sub>6</sub>)

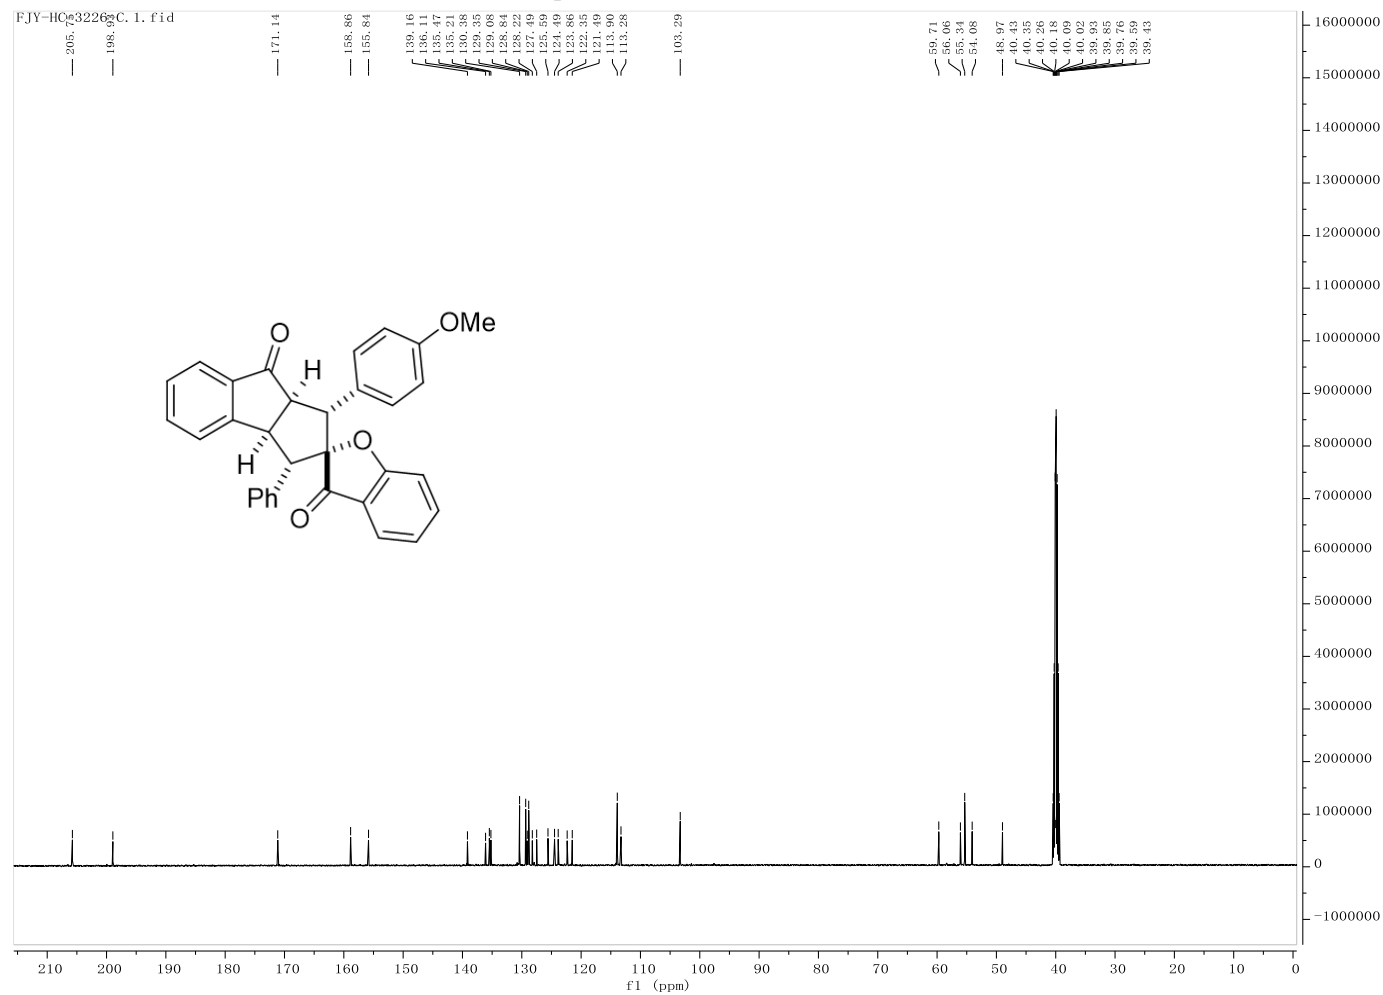

<sup>1</sup>H NMR spectrum of **5c** (500 MHz, CDCl<sub>3</sub>)

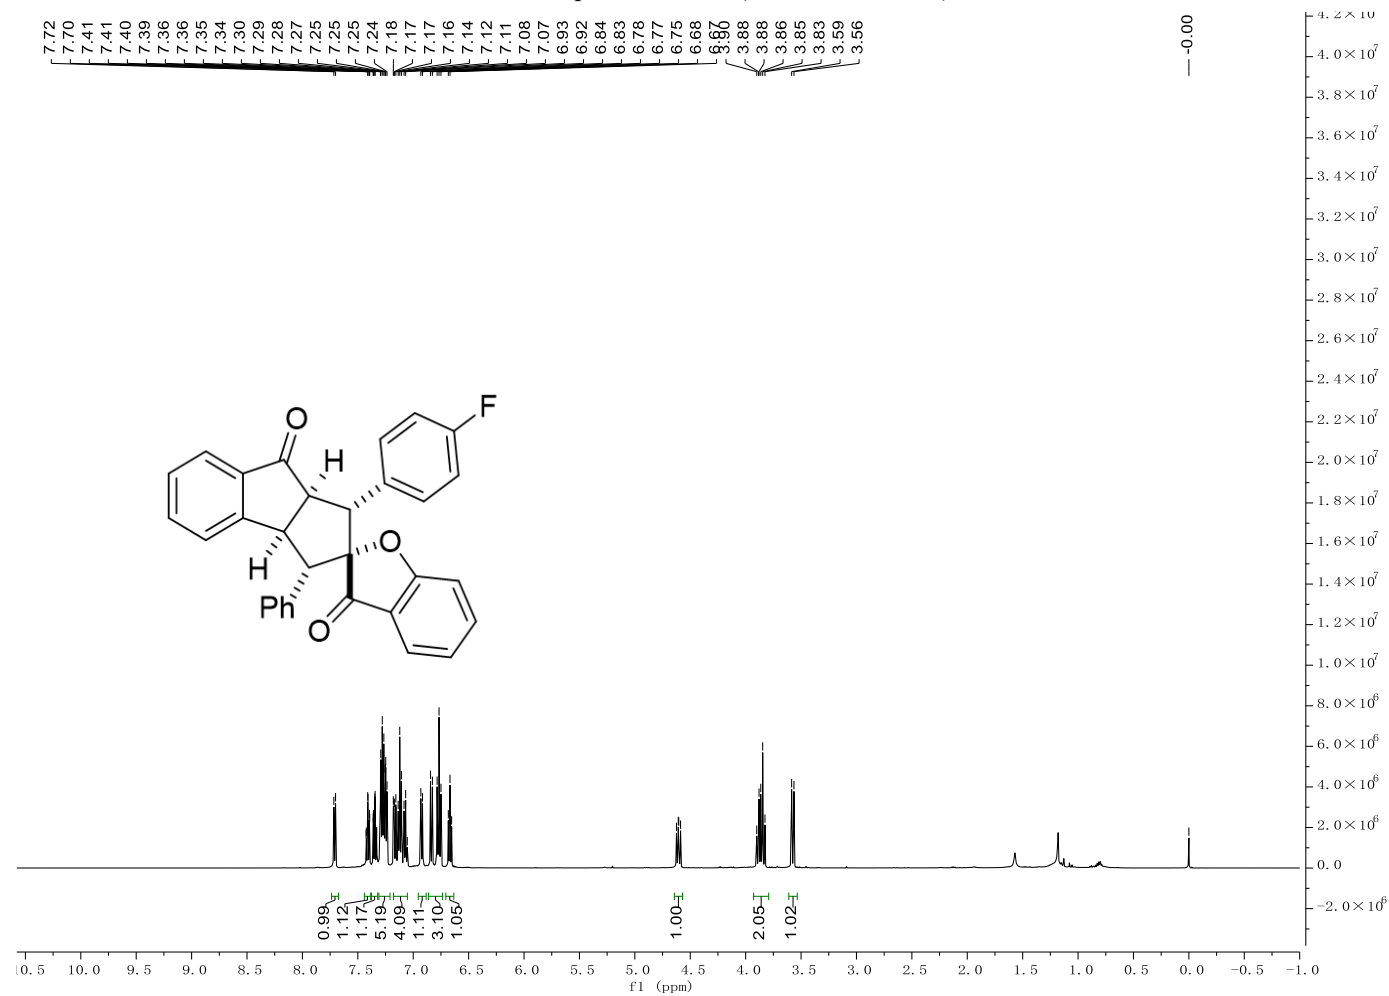

<sup>13</sup>C NMR spectrum of **5c** (125 MHz, CDCl<sub>3</sub>)

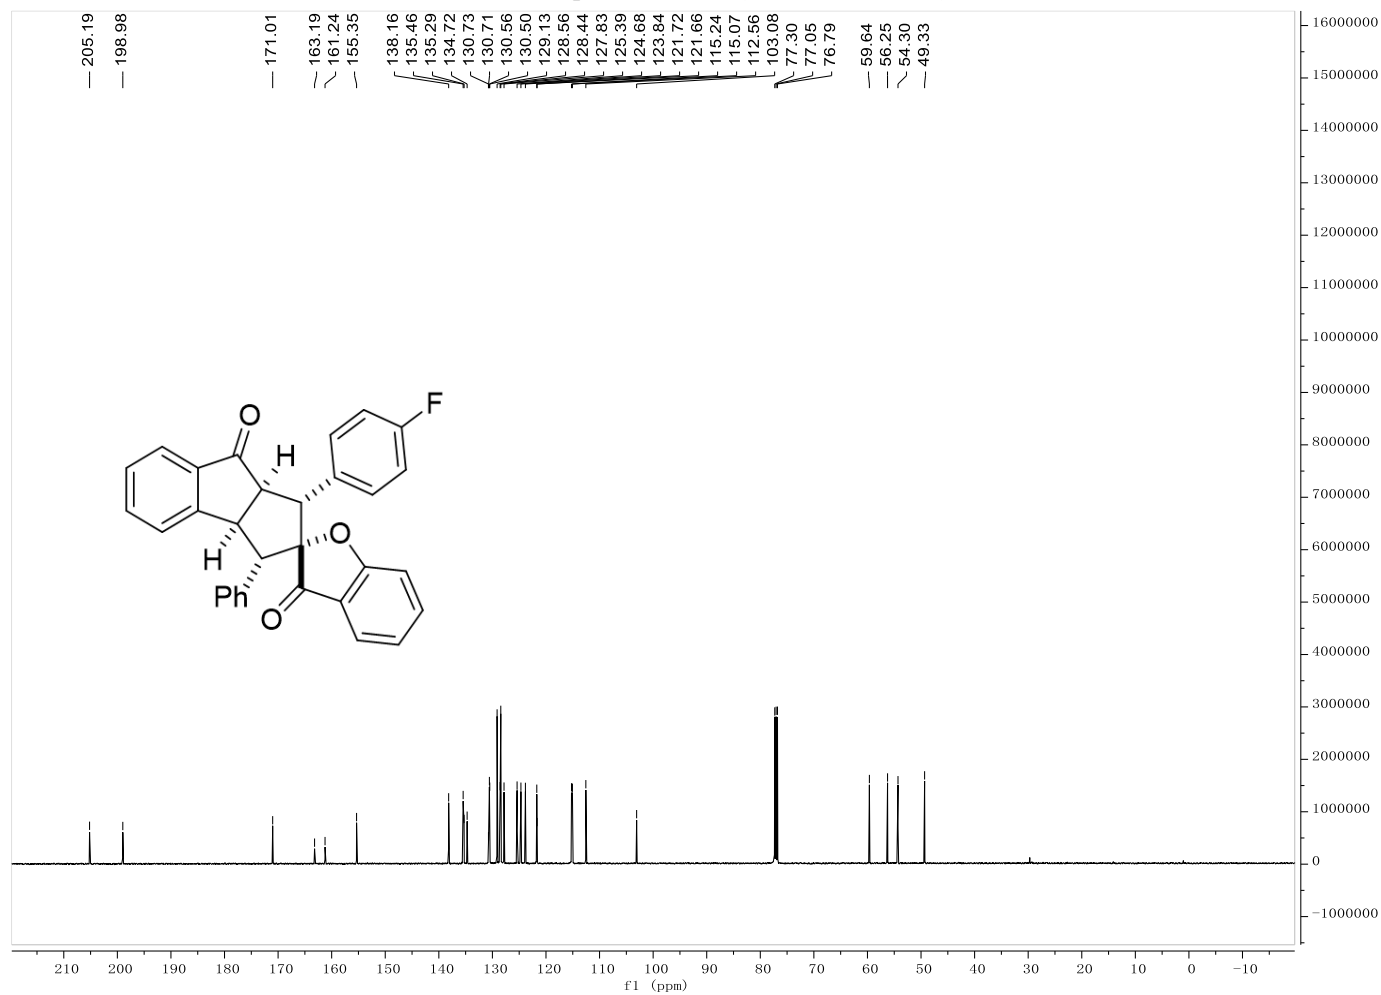

<sup>1</sup>H NMR spectrum of **5d** (500 MHz, CDCl<sub>3</sub>)

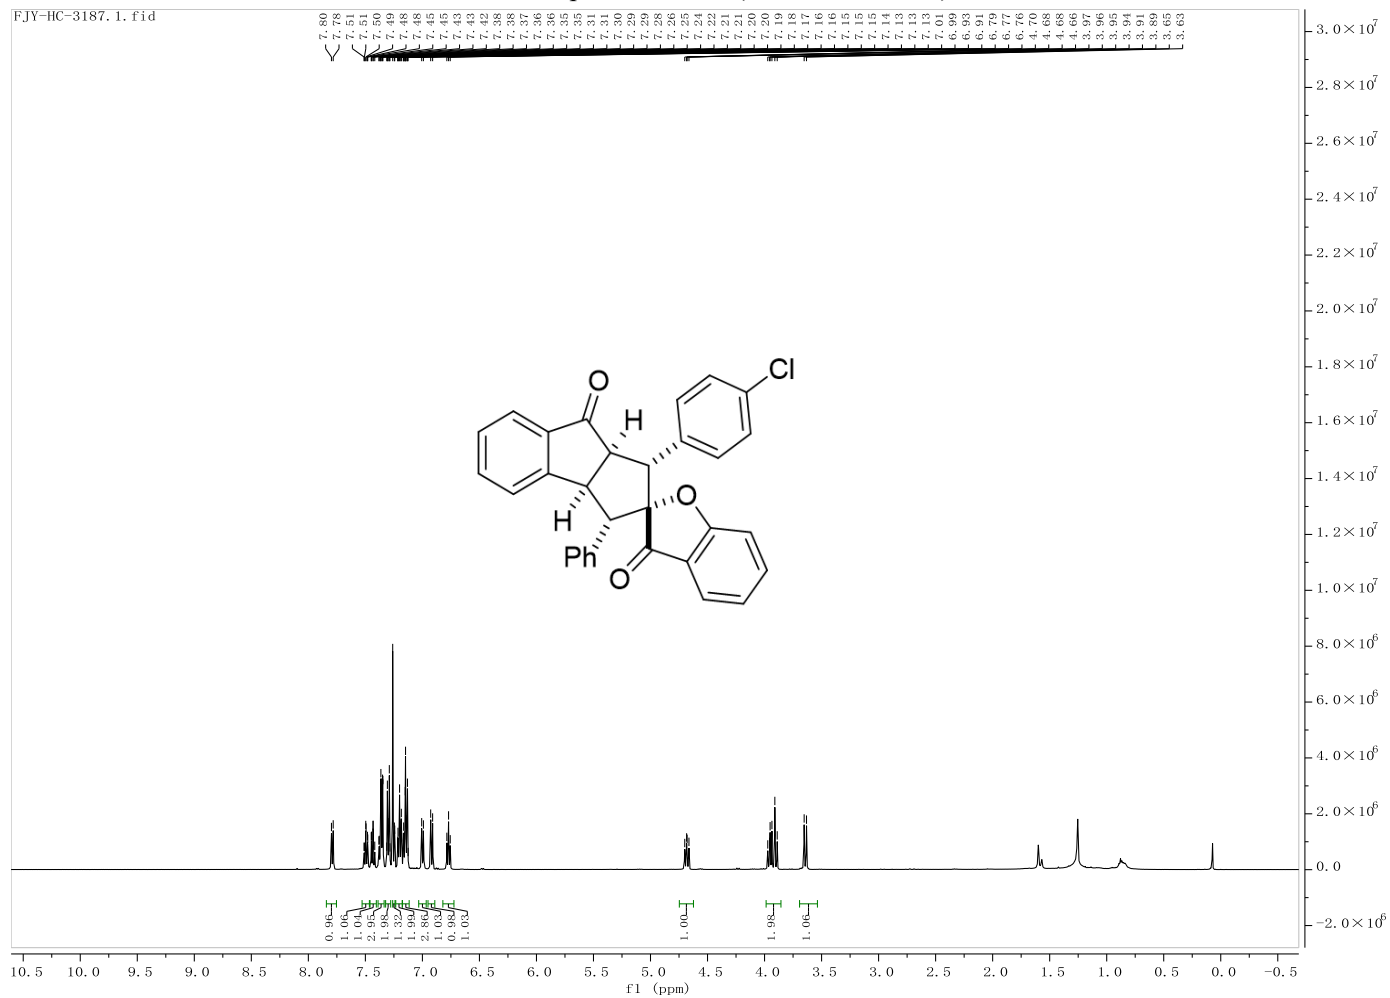

<sup>13</sup>C NMR spectrum of **5d** (125 MHz, DMSO-*d*<sub>6</sub>)

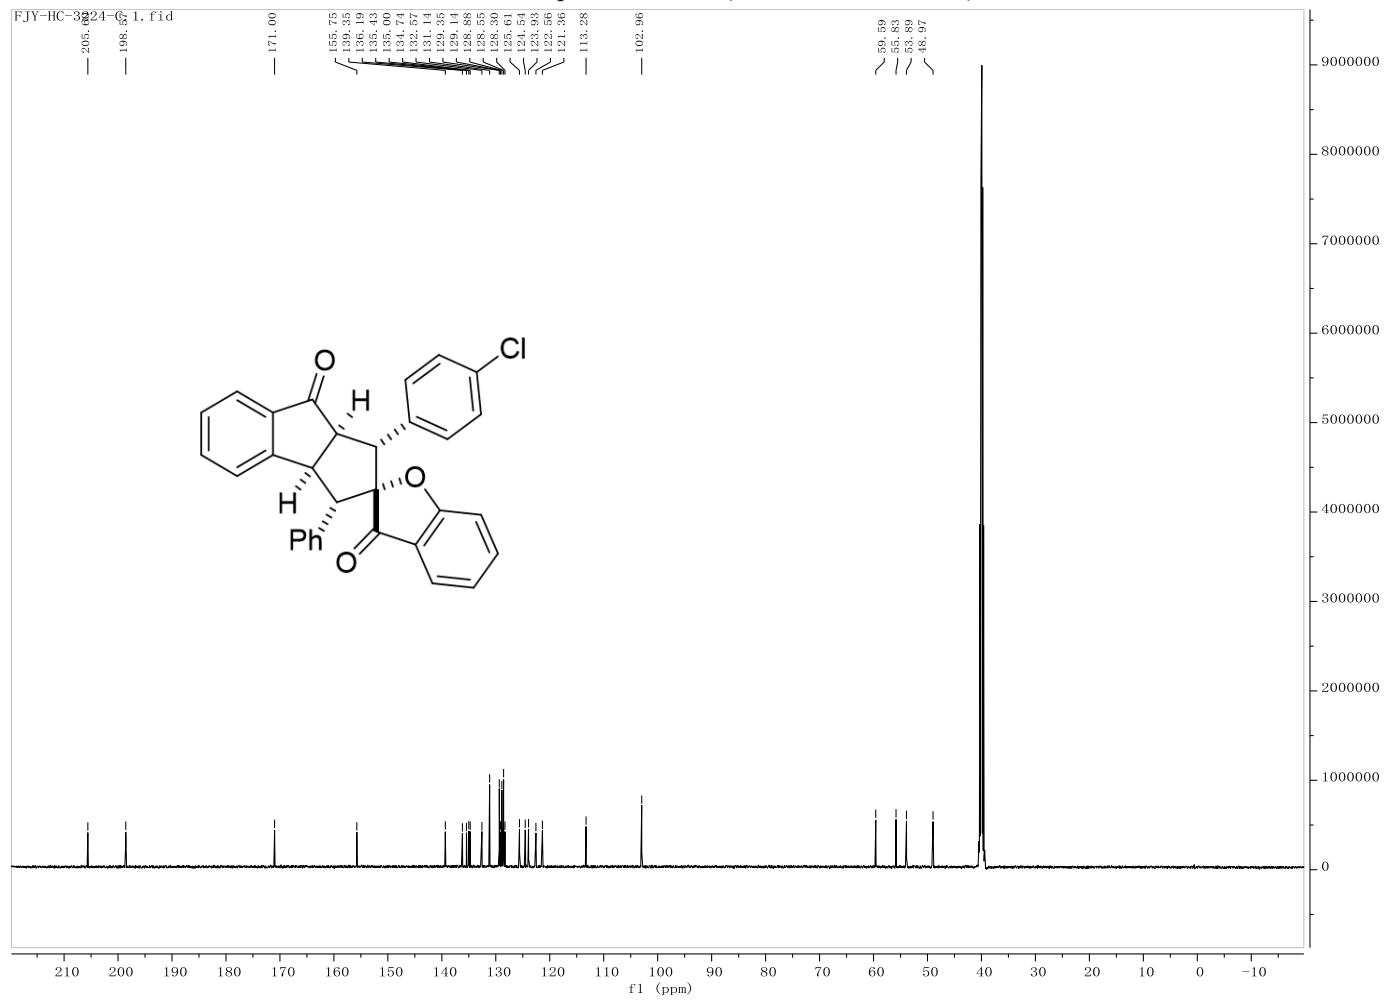

<sup>1</sup>H NMR spectrum of **5e** (500 MHz, CDCl<sub>3</sub>)

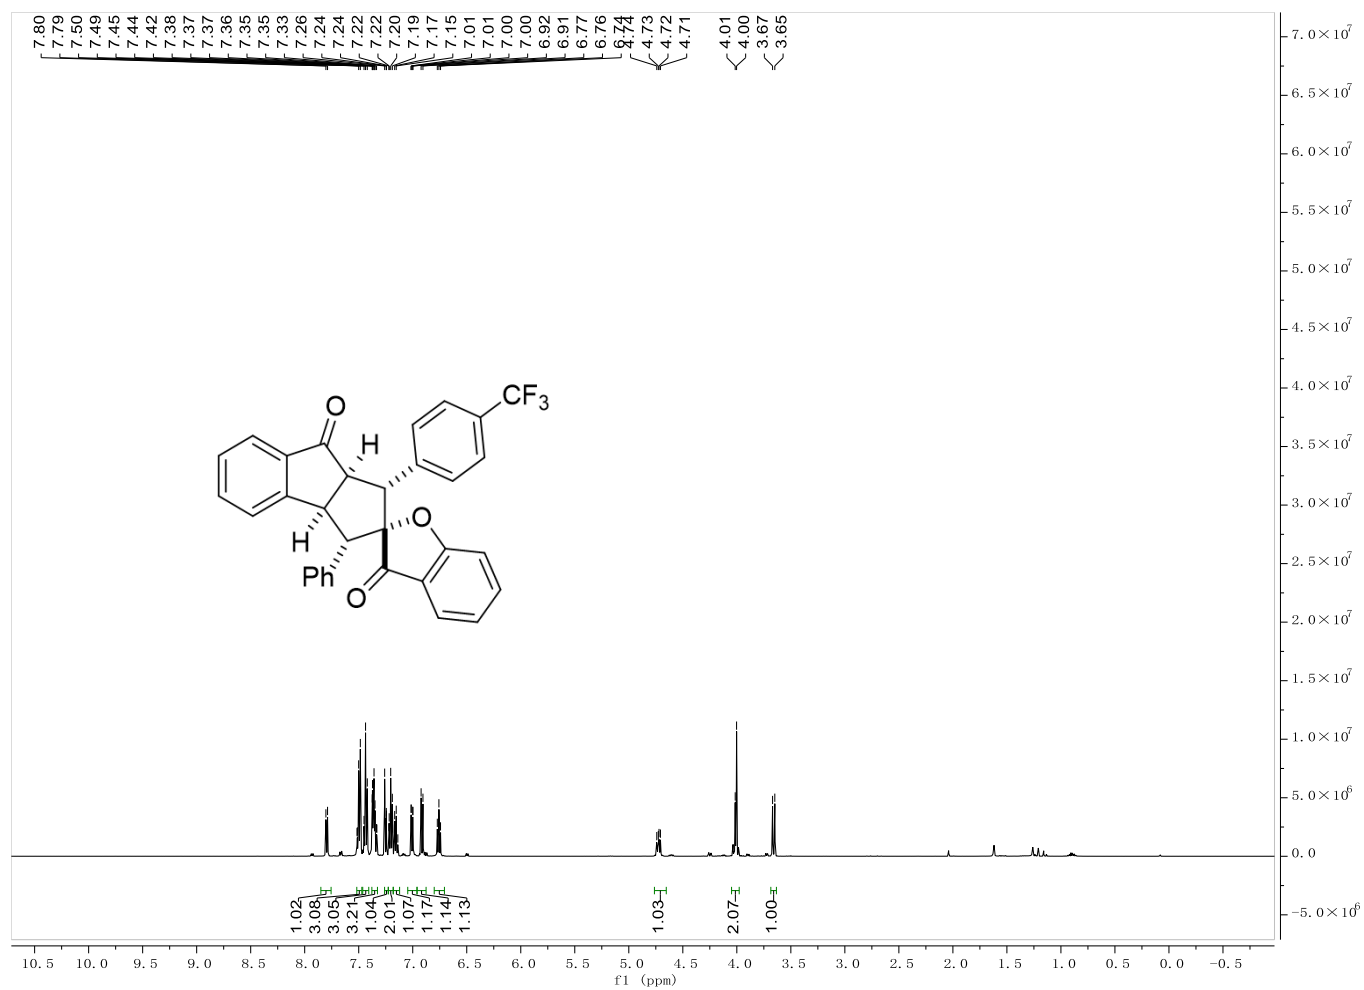



<sup>13</sup>C NMR spectrum of **5e** (125 MHz, CDCl<sub>3</sub>)

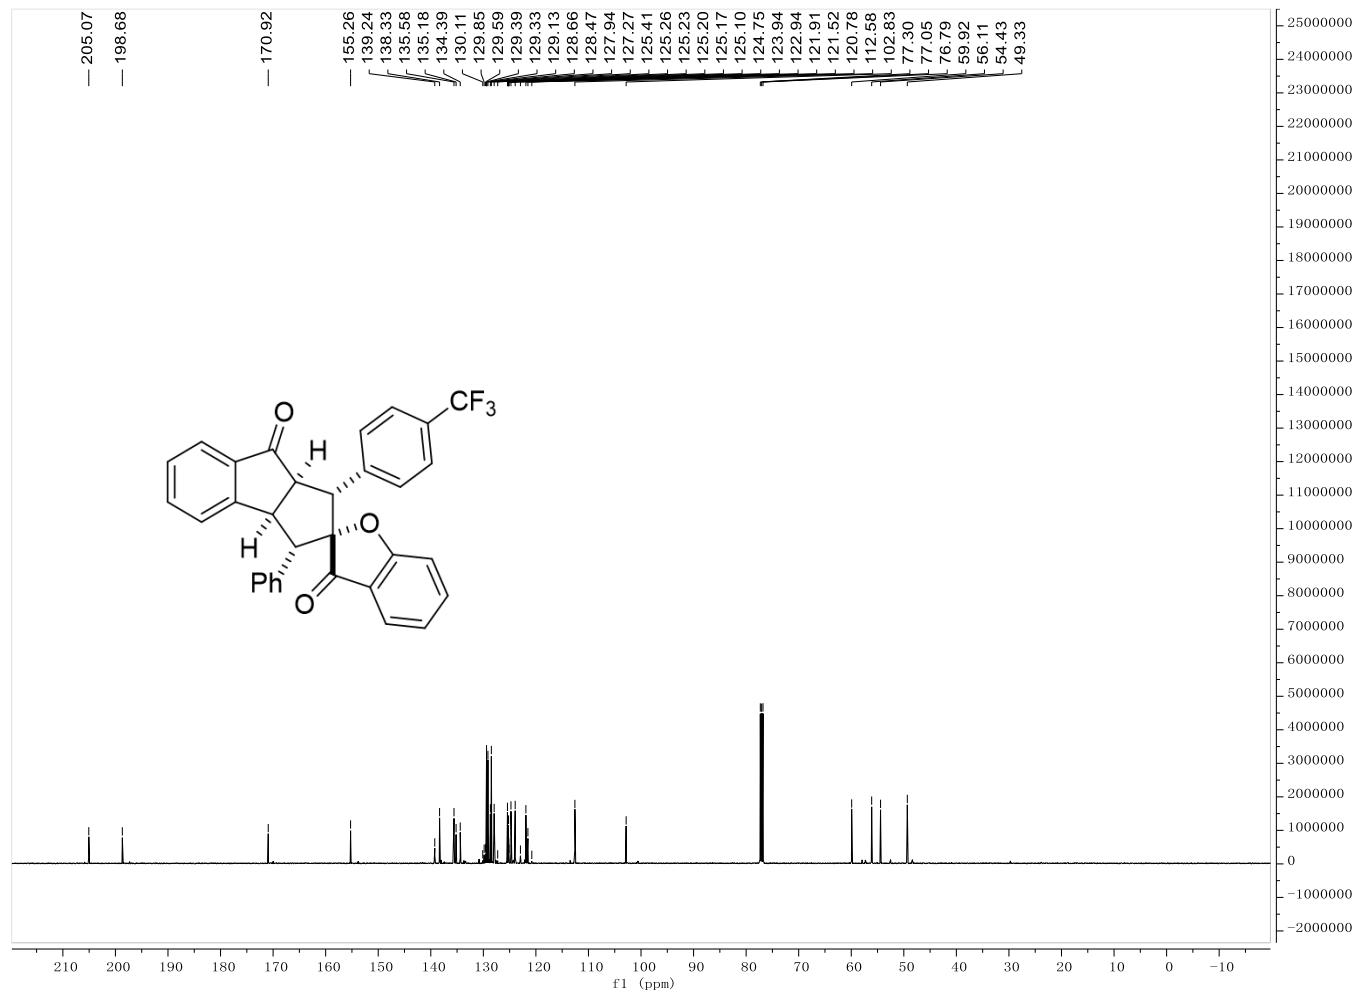

<sup>1</sup>H NMR spectrum of **5f** (500 MHz, CDCl<sub>3</sub>)

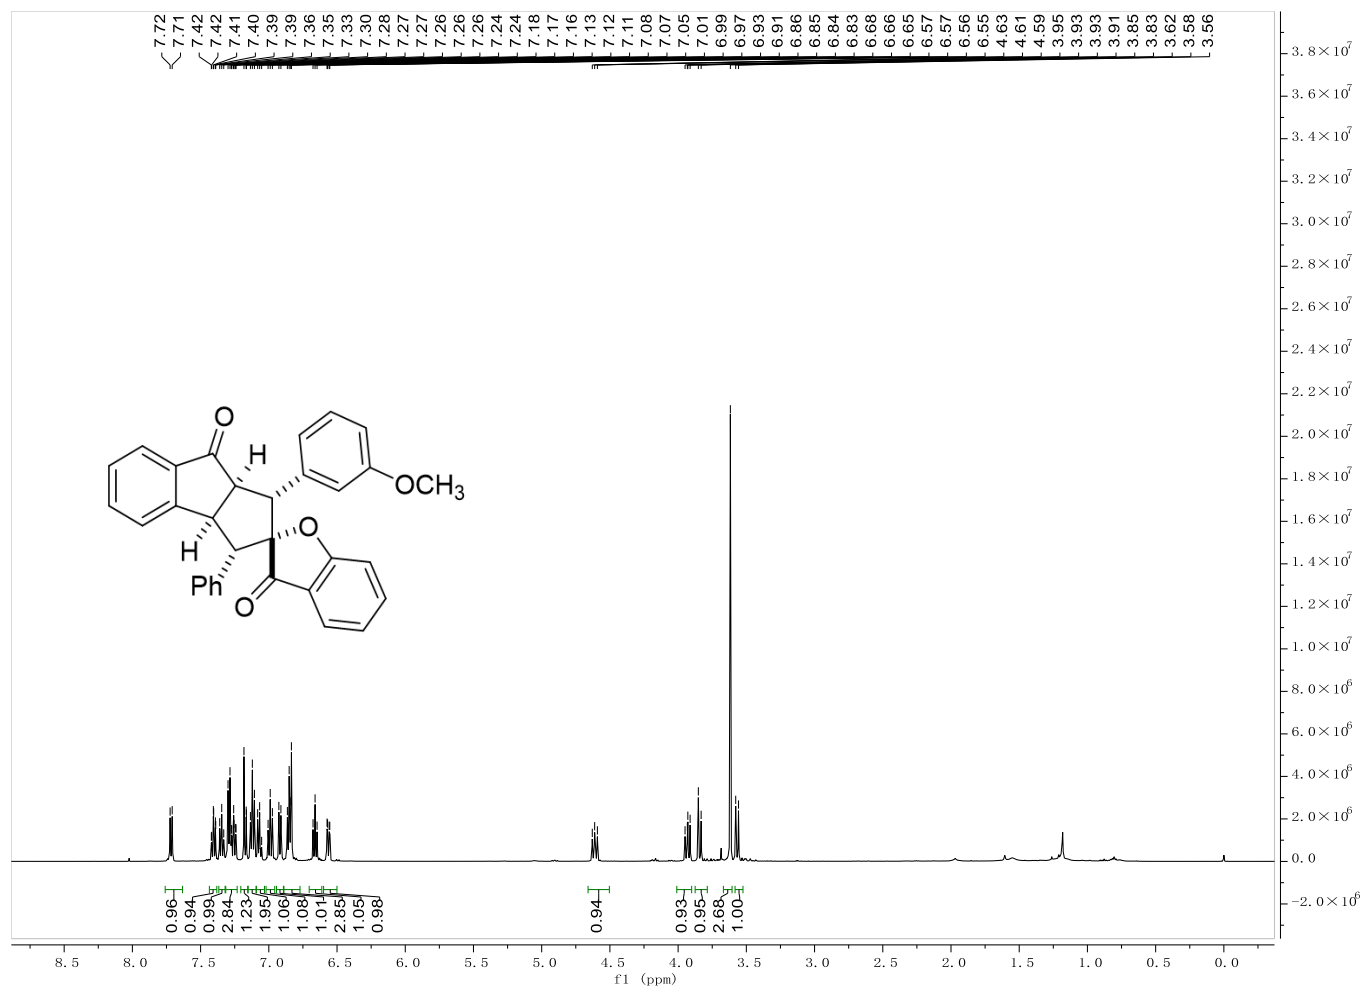

<sup>13</sup>C NMR spectrum of **5f** (125 MHz, CDCl<sub>3</sub>)

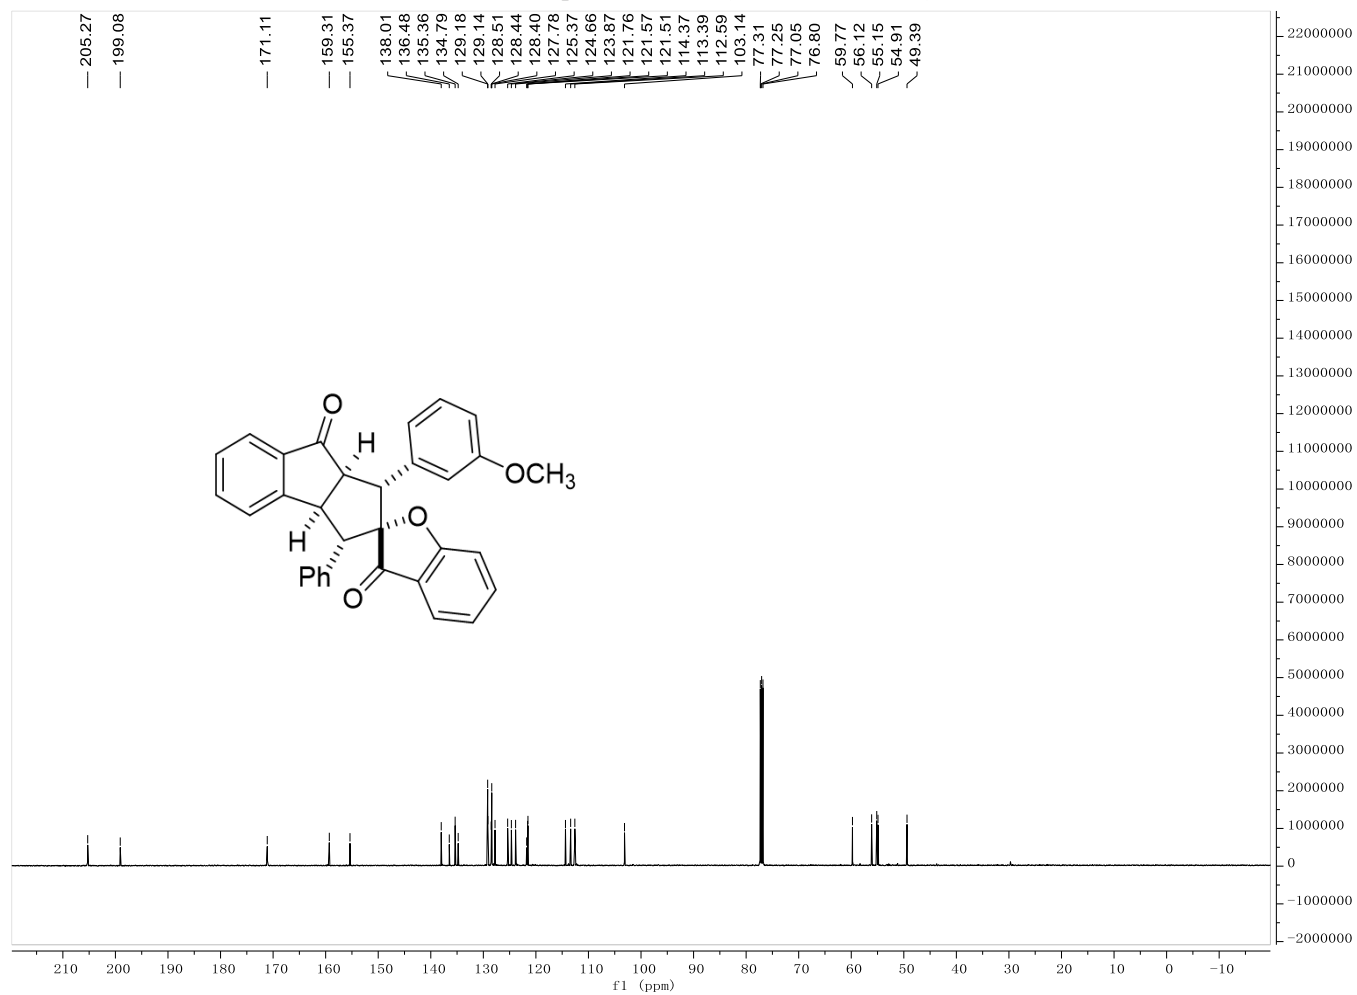

<sup>1</sup>H NMR spectrum of **5g** (500 MHz, CDCl<sub>3</sub>)

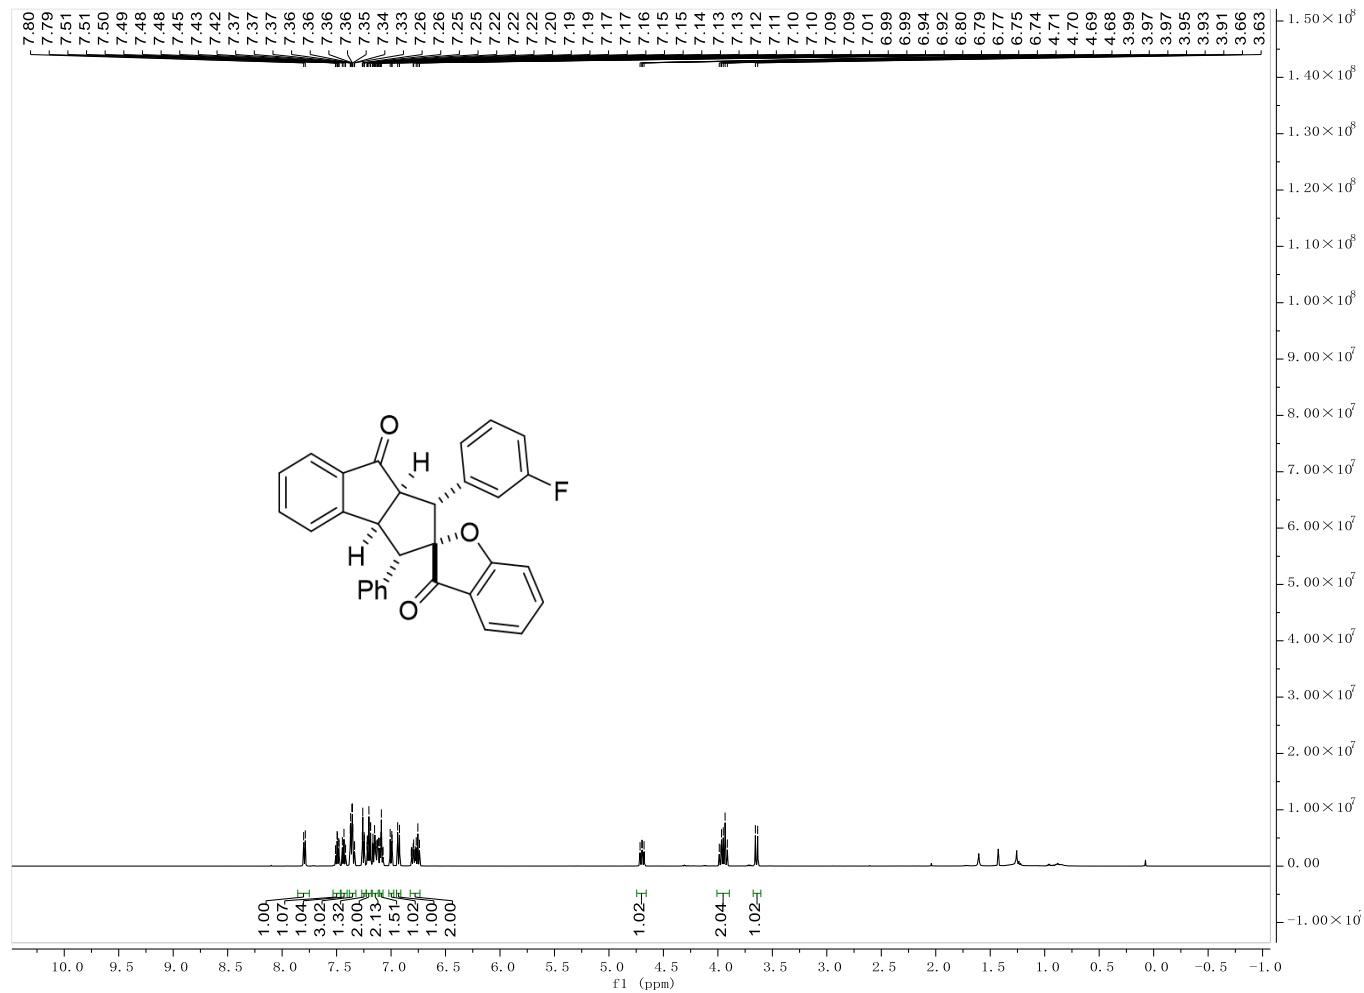

<sup>13</sup>C NMR spectrum of **5g** (125 MHz, CDCl<sub>3</sub>)

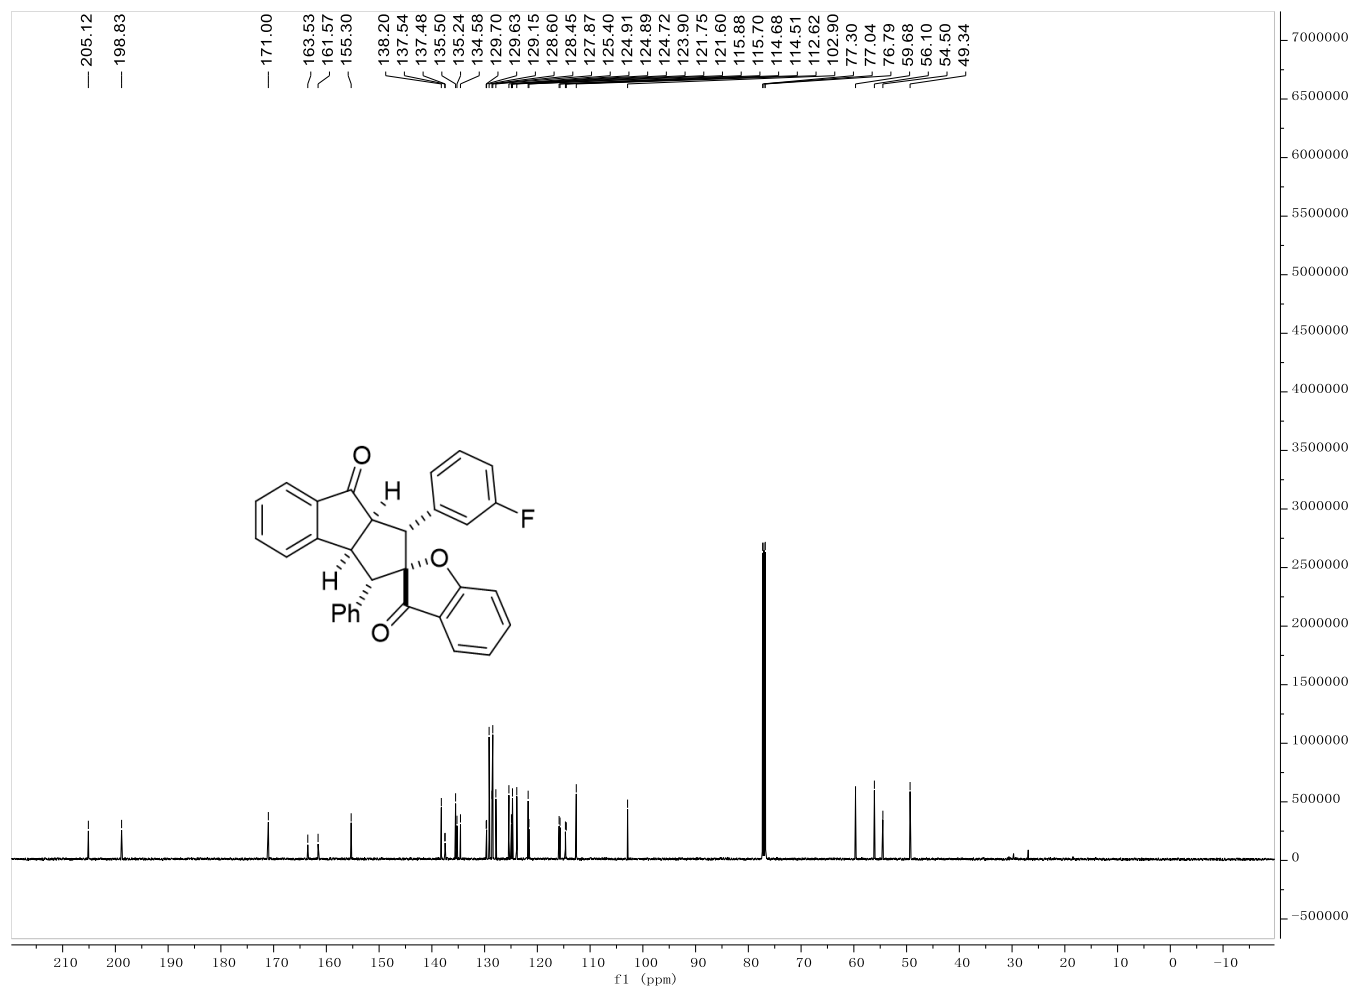

<sup>1</sup>H NMR spectrum of **5h** (500 MHz, CDCl<sub>3</sub>)

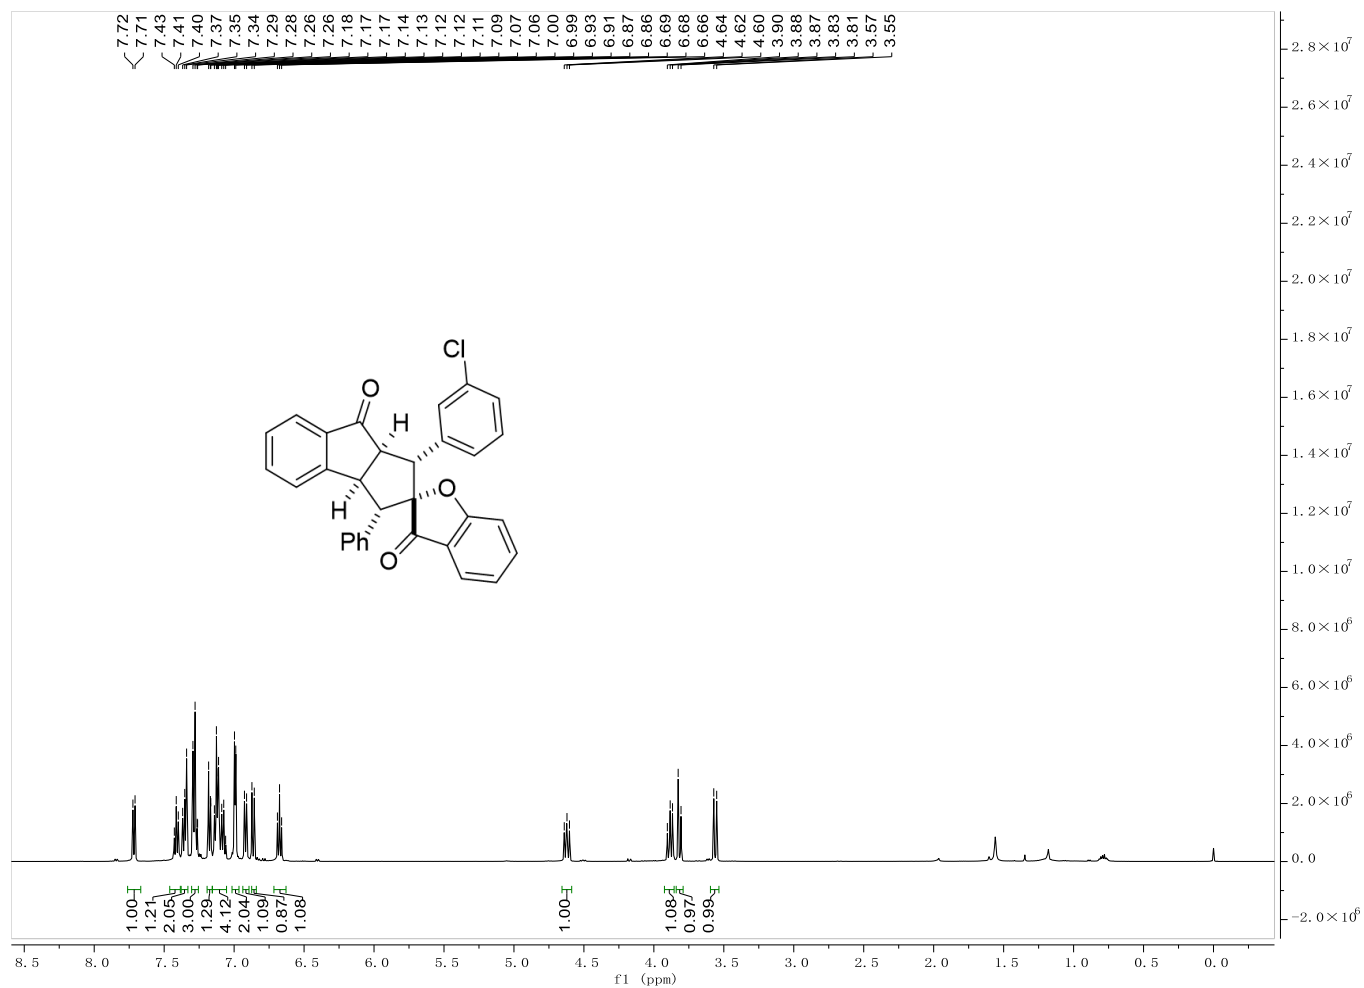

<sup>13</sup>C NMR spectrum of **5h** (125 MHz, CDCl<sub>3</sub>)

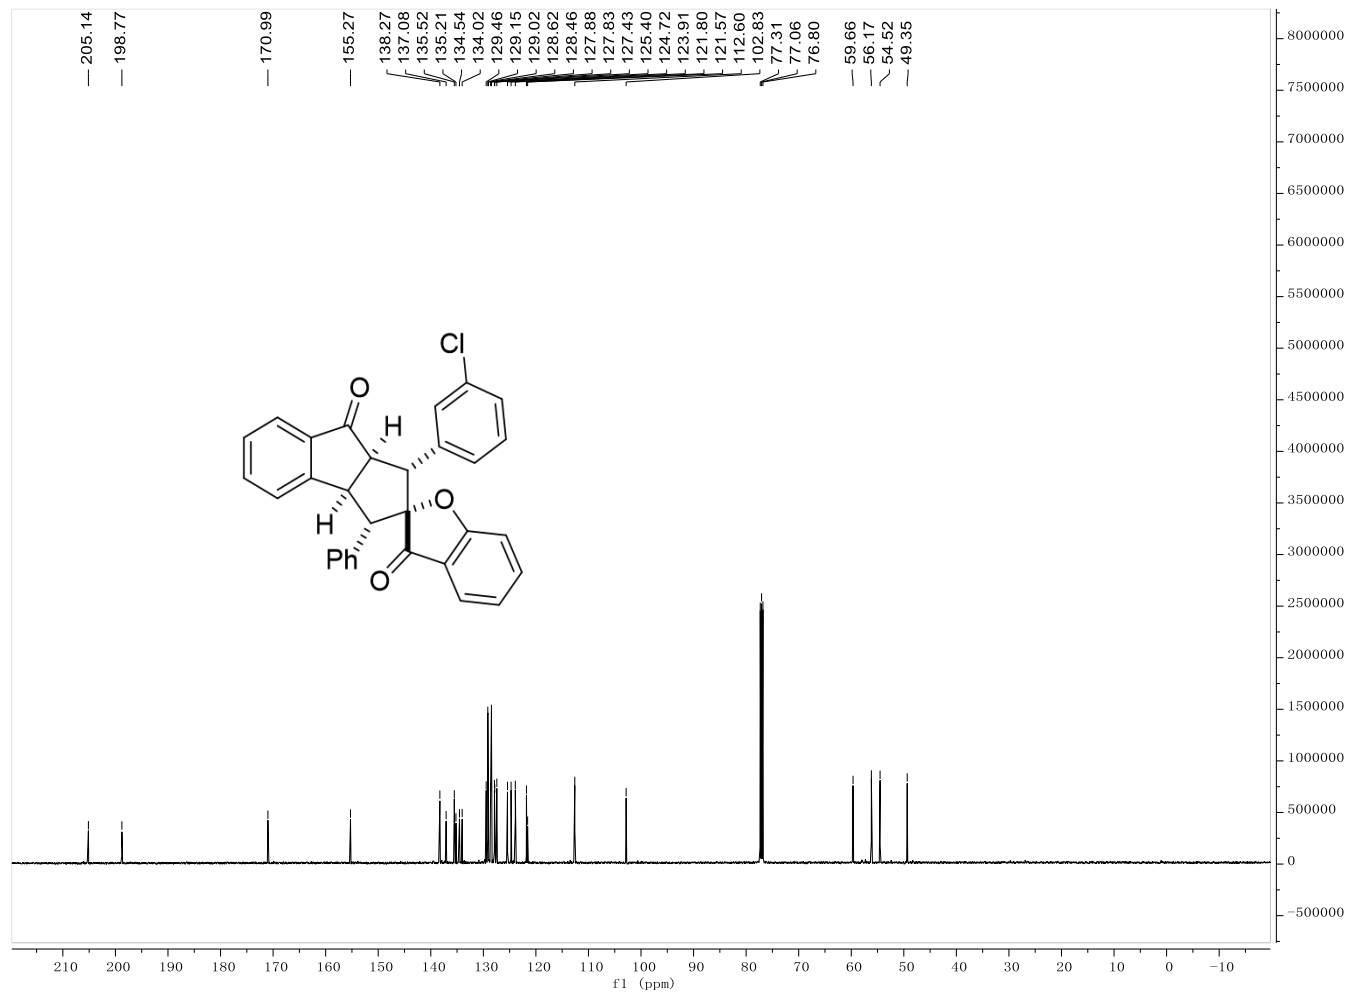

<sup>1</sup>H NMR spectrum of **5i** (500 MHz, CDCl<sub>3</sub>)

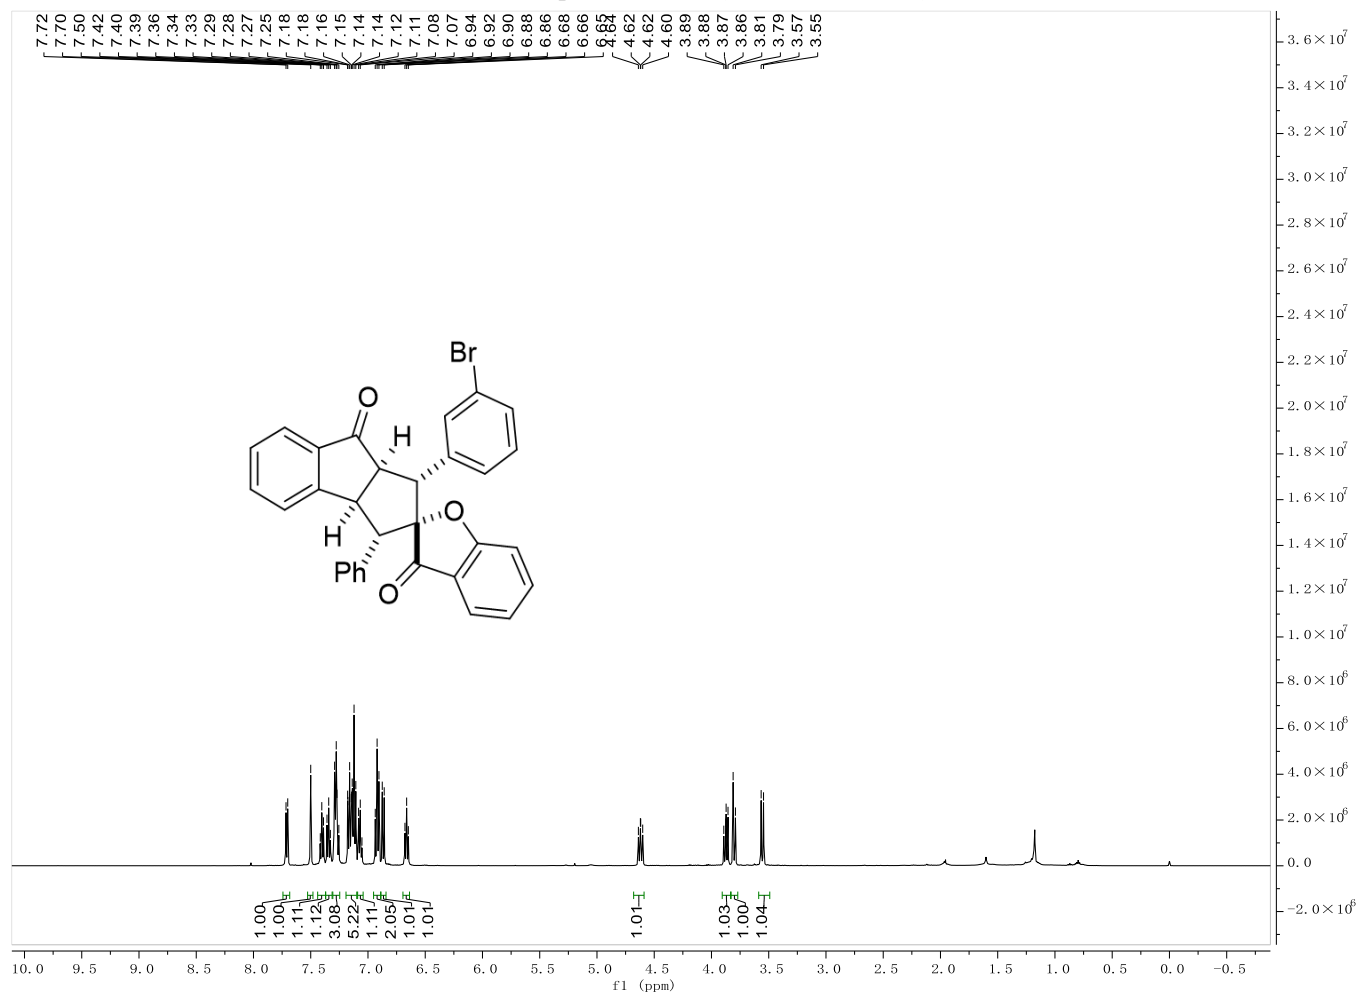



$^{13}\text{C}$  NMR spectrum of **5i** (125 MHz,  $\text{CDCl}_3$ )

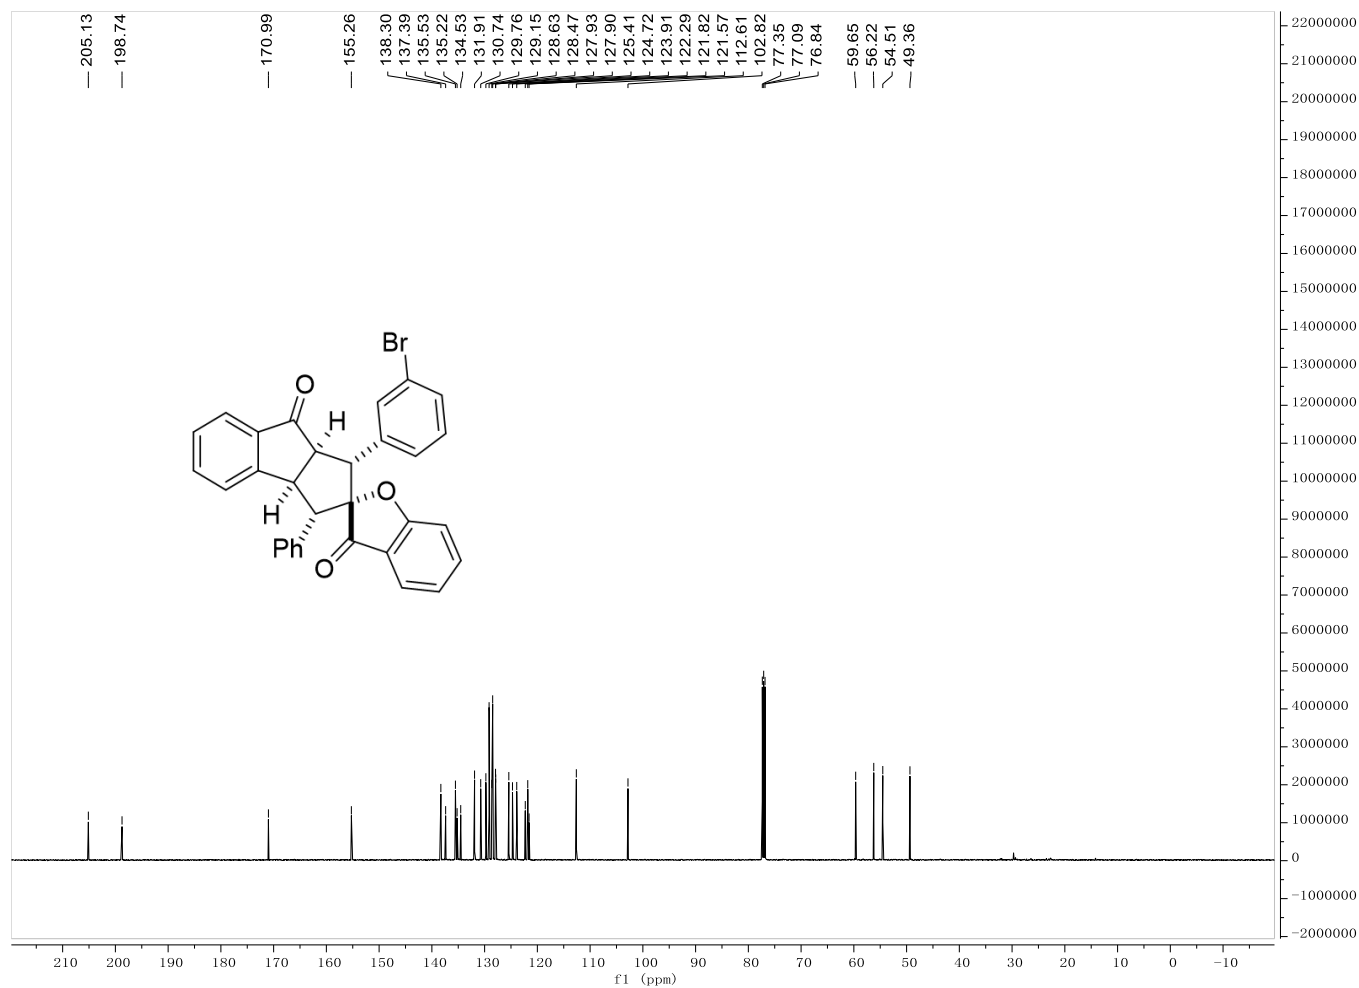

<sup>1</sup>H NMR spectrum of **5j** (125 MHz, CDCl<sub>3</sub>)

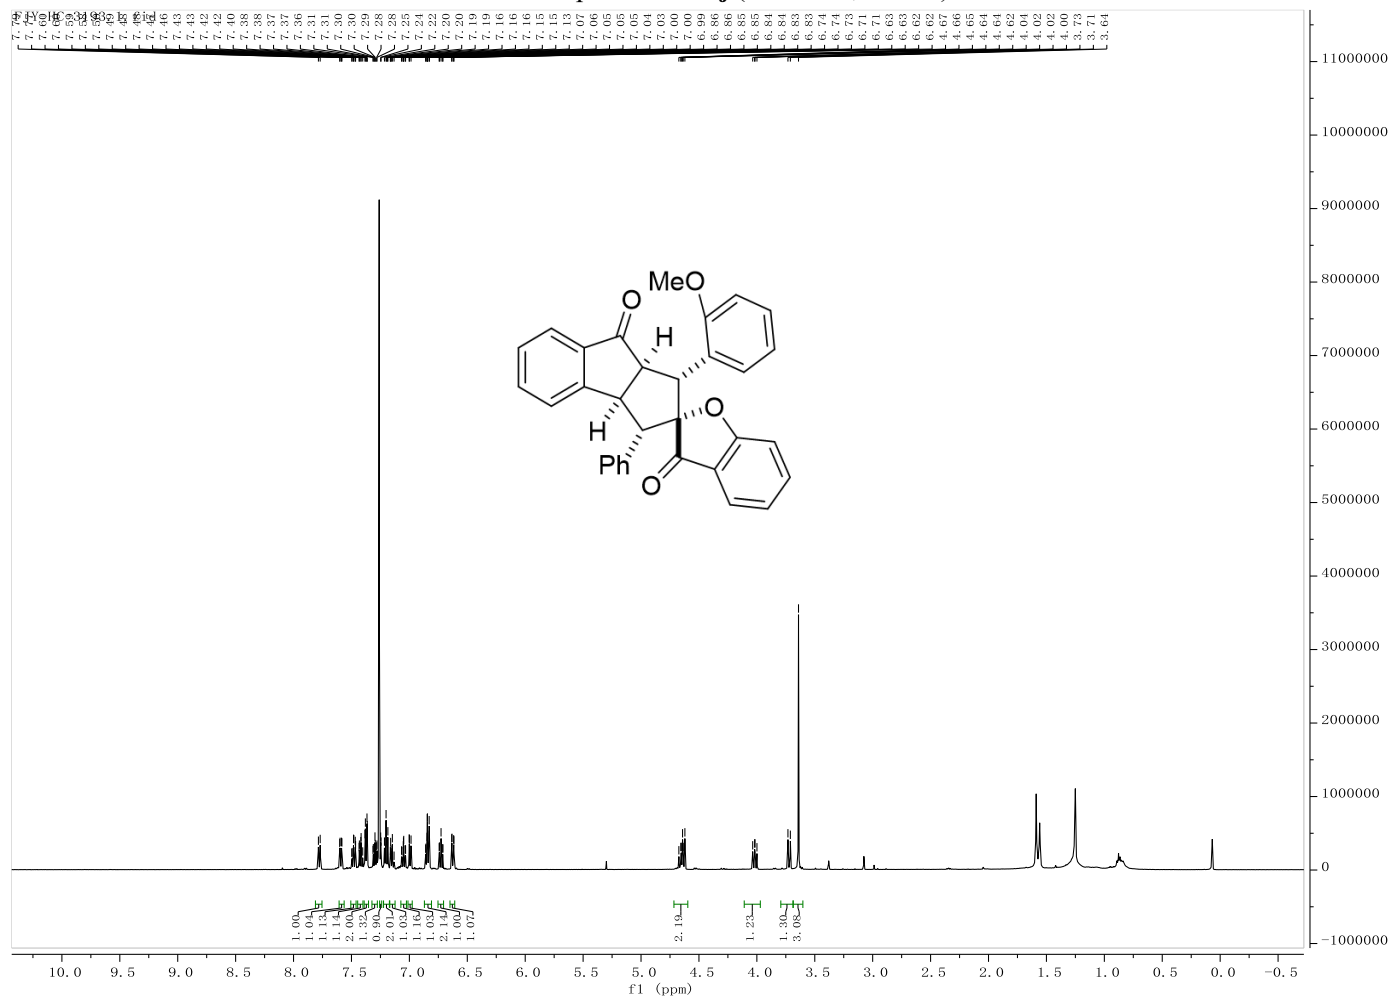

<sup>13</sup>C NMR spectrum of **5j** (125 MHz, DMSO-*d*<sub>6</sub>)

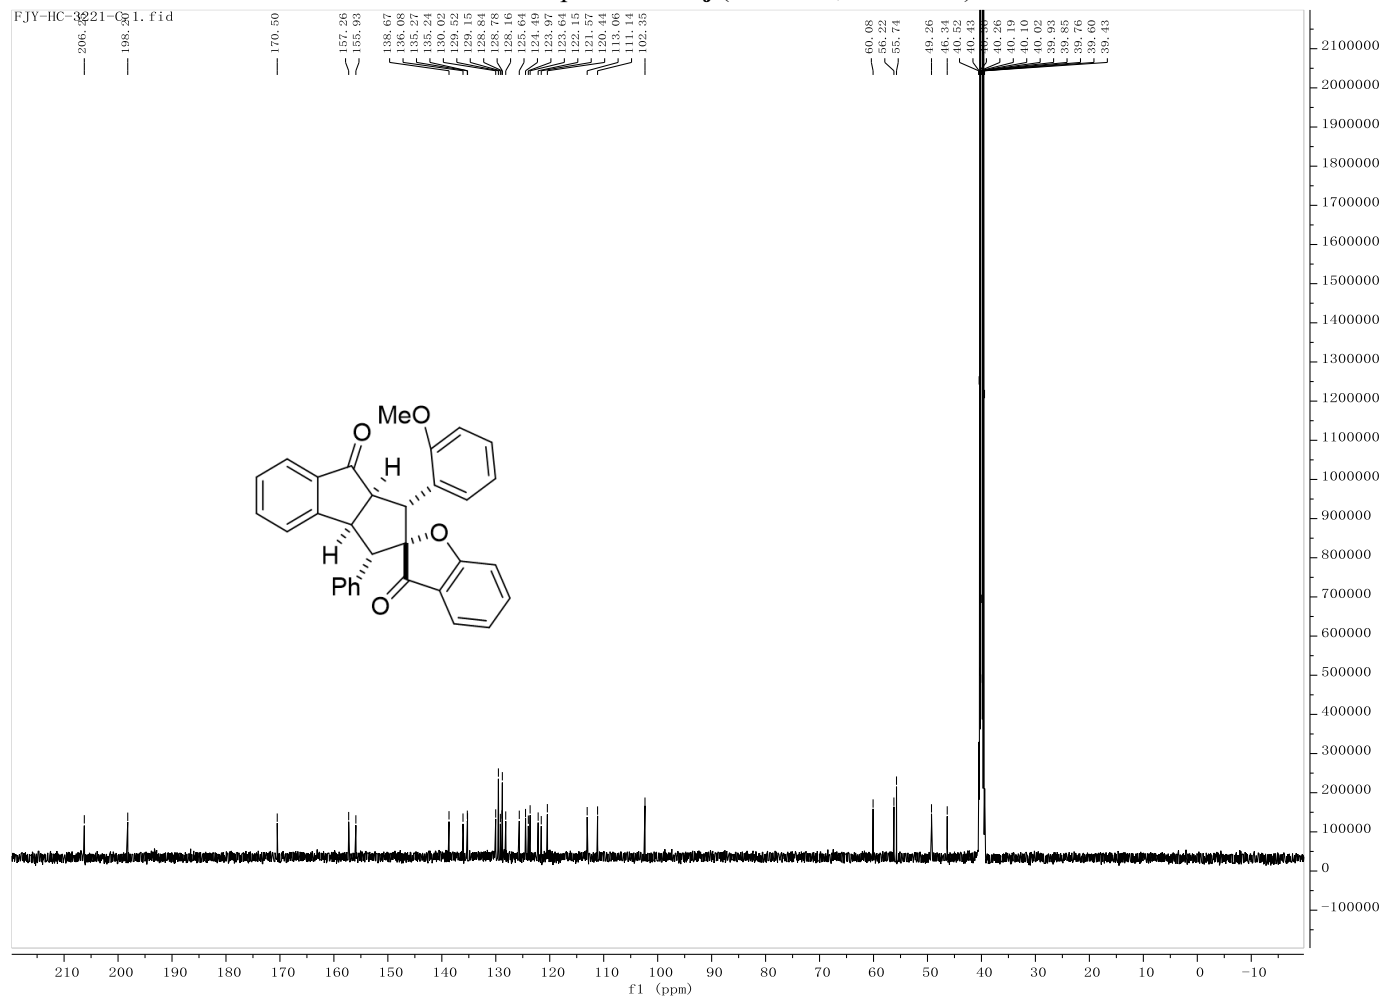

<sup>1</sup>H NMR spectrum of **5k** (500 MHz, CDCl<sub>3</sub>)

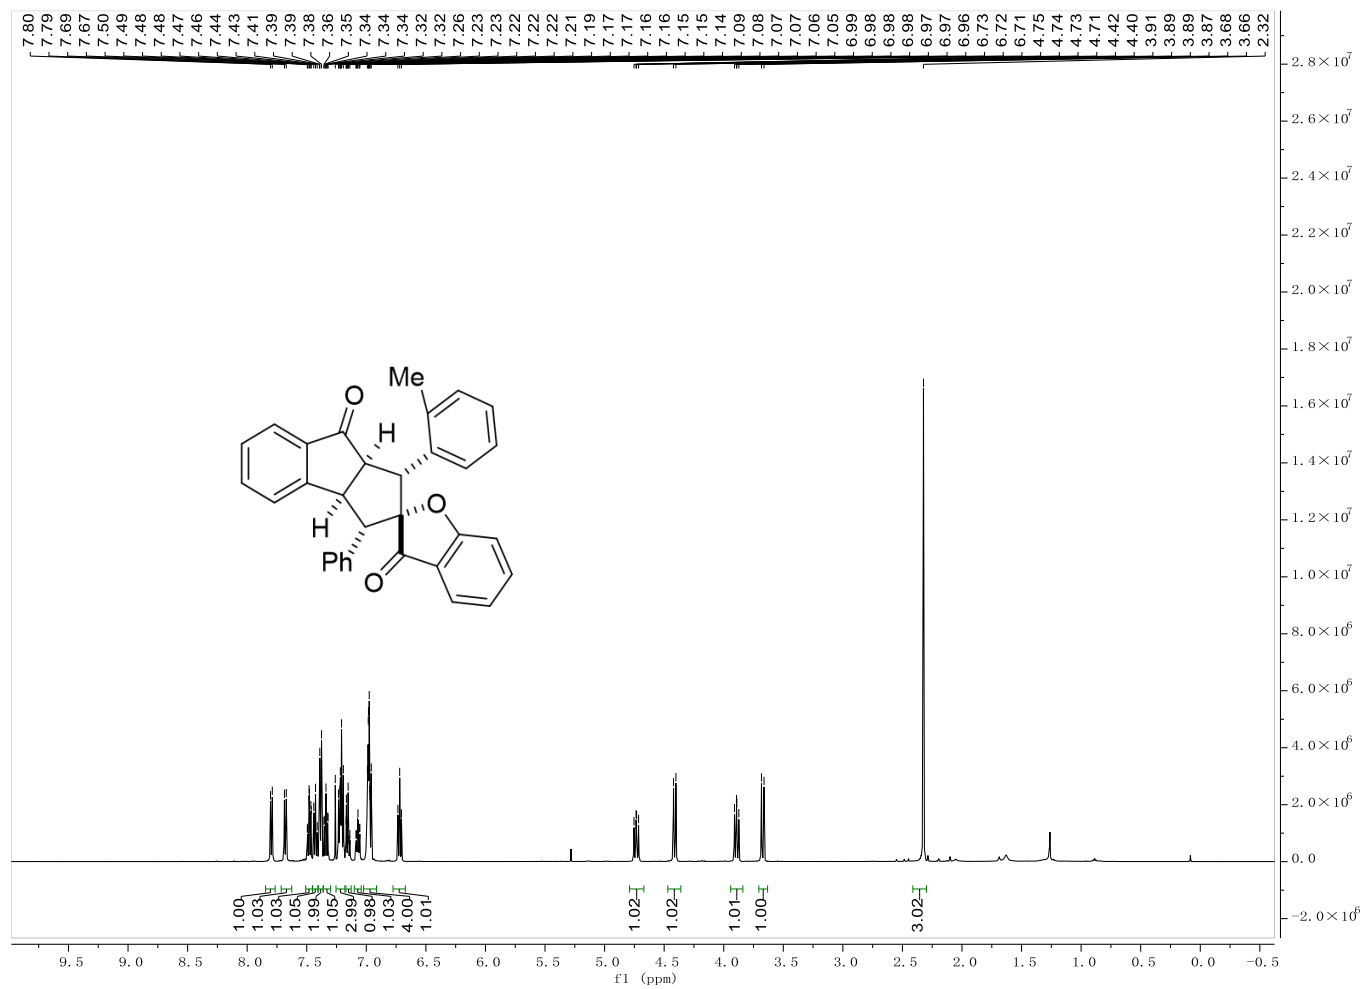

<sup>13</sup>C NMR spectrum of **5k** (125 MHz, CDCl<sub>3</sub>)

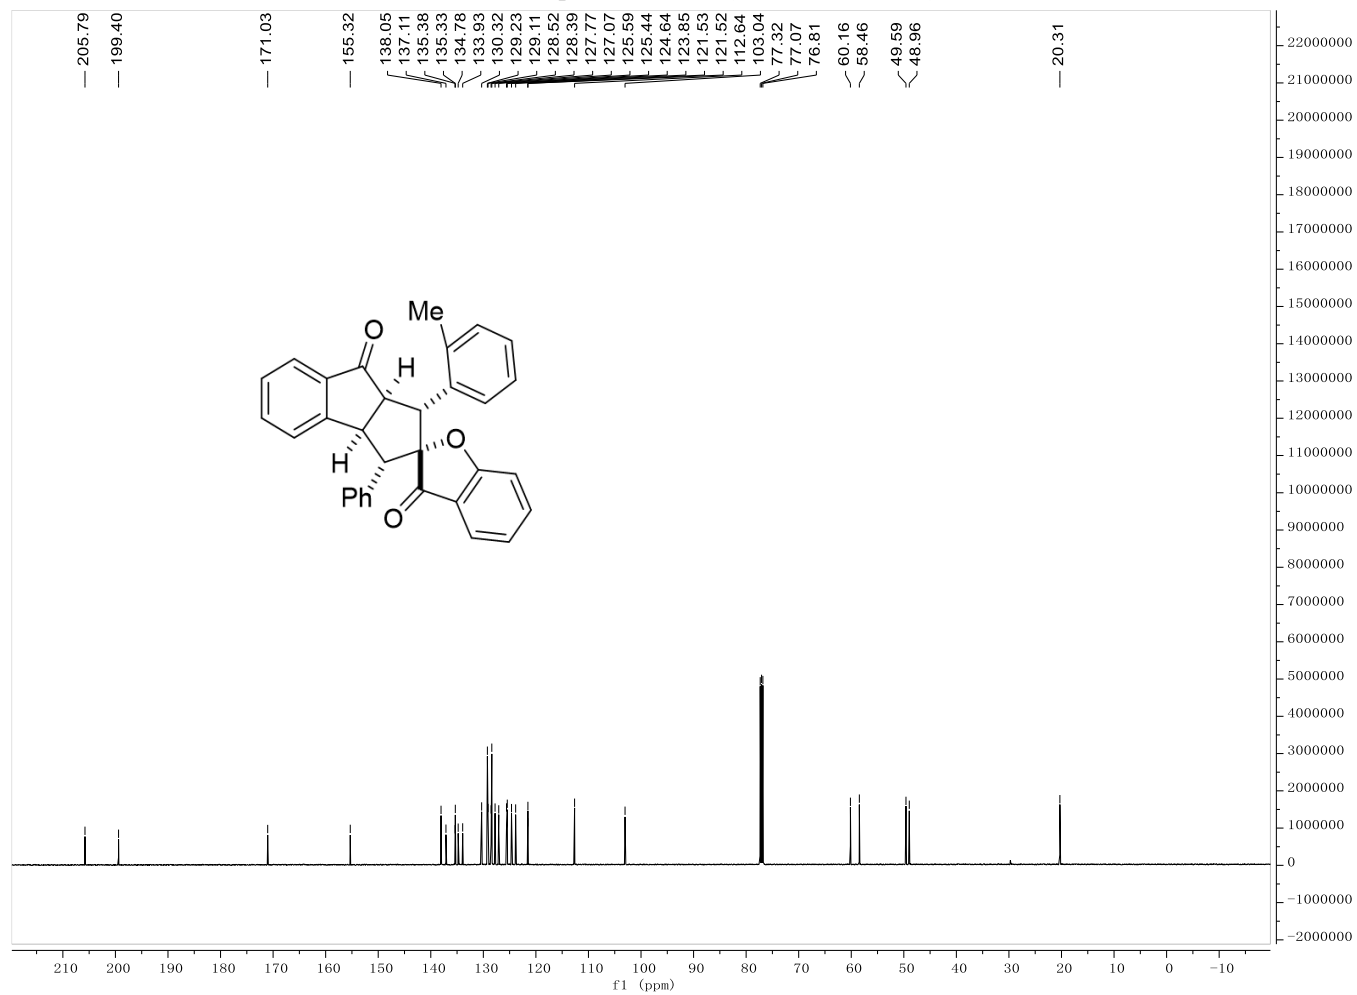

<sup>1</sup>H NMR spectrum of **5I** (500 MHz, CDCl<sub>3</sub>)

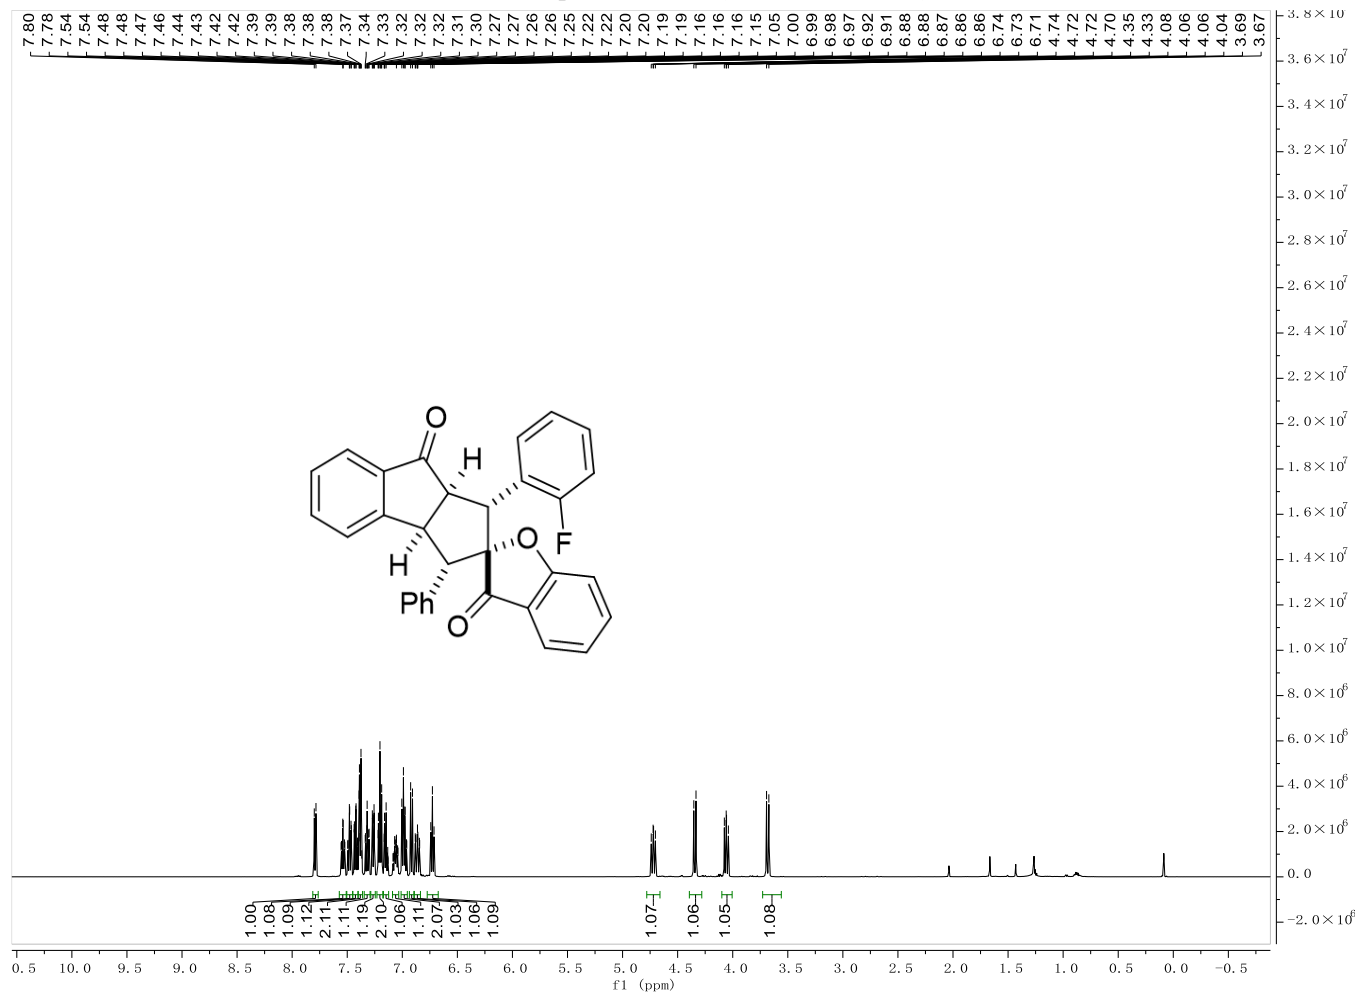

<sup>13</sup>C NMR spectrum of **5I** (125 MHz, CDCl<sub>3</sub>)

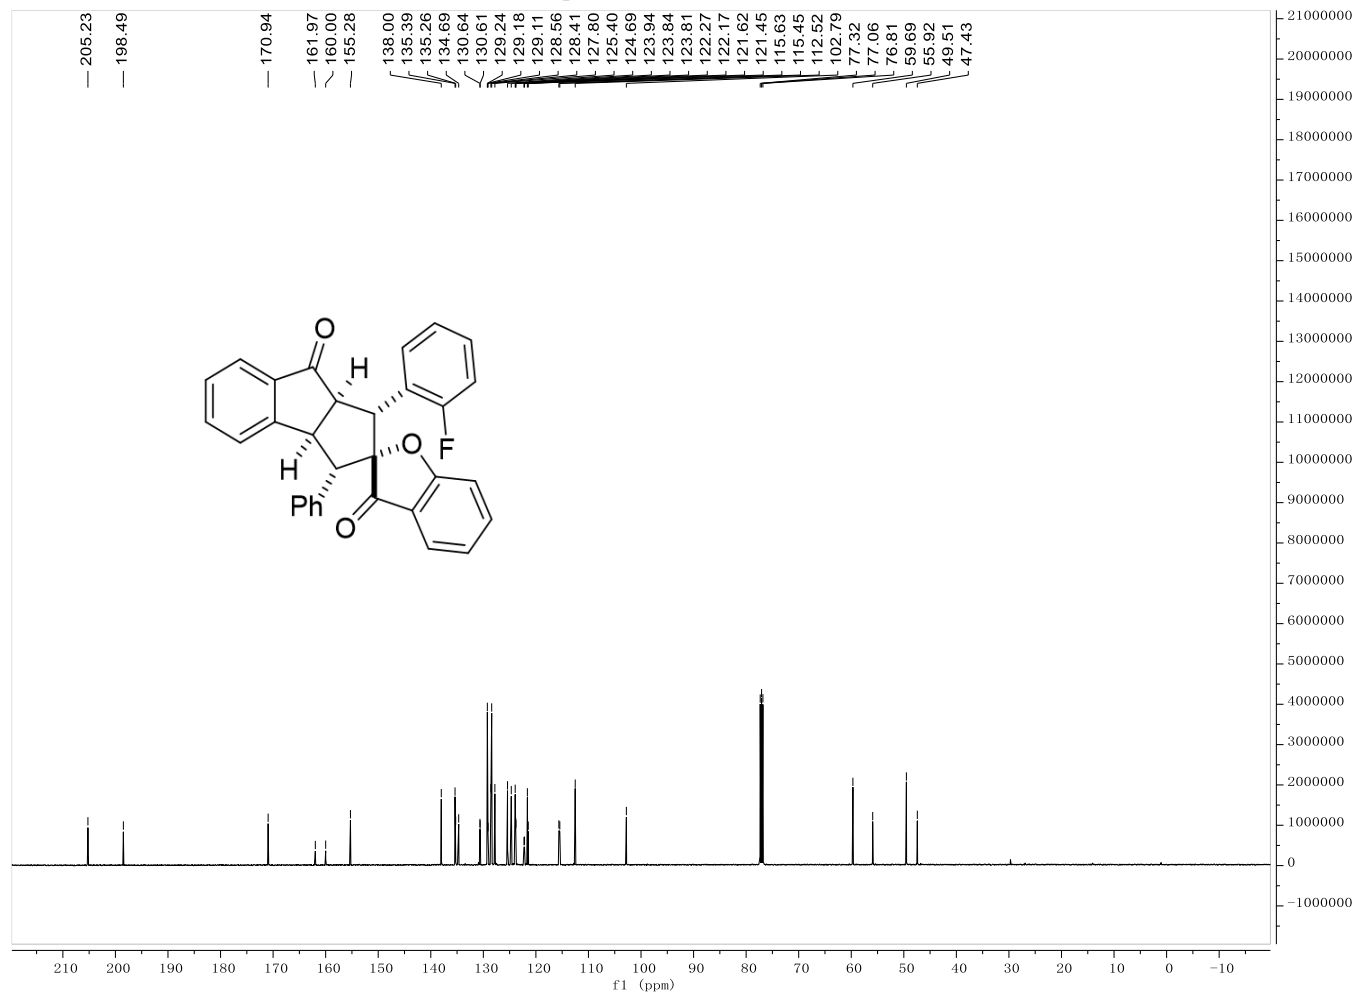

<sup>1</sup>H NMR spectrum of **5m** (500 MHz, DMSO-*d*<sub>6</sub>)

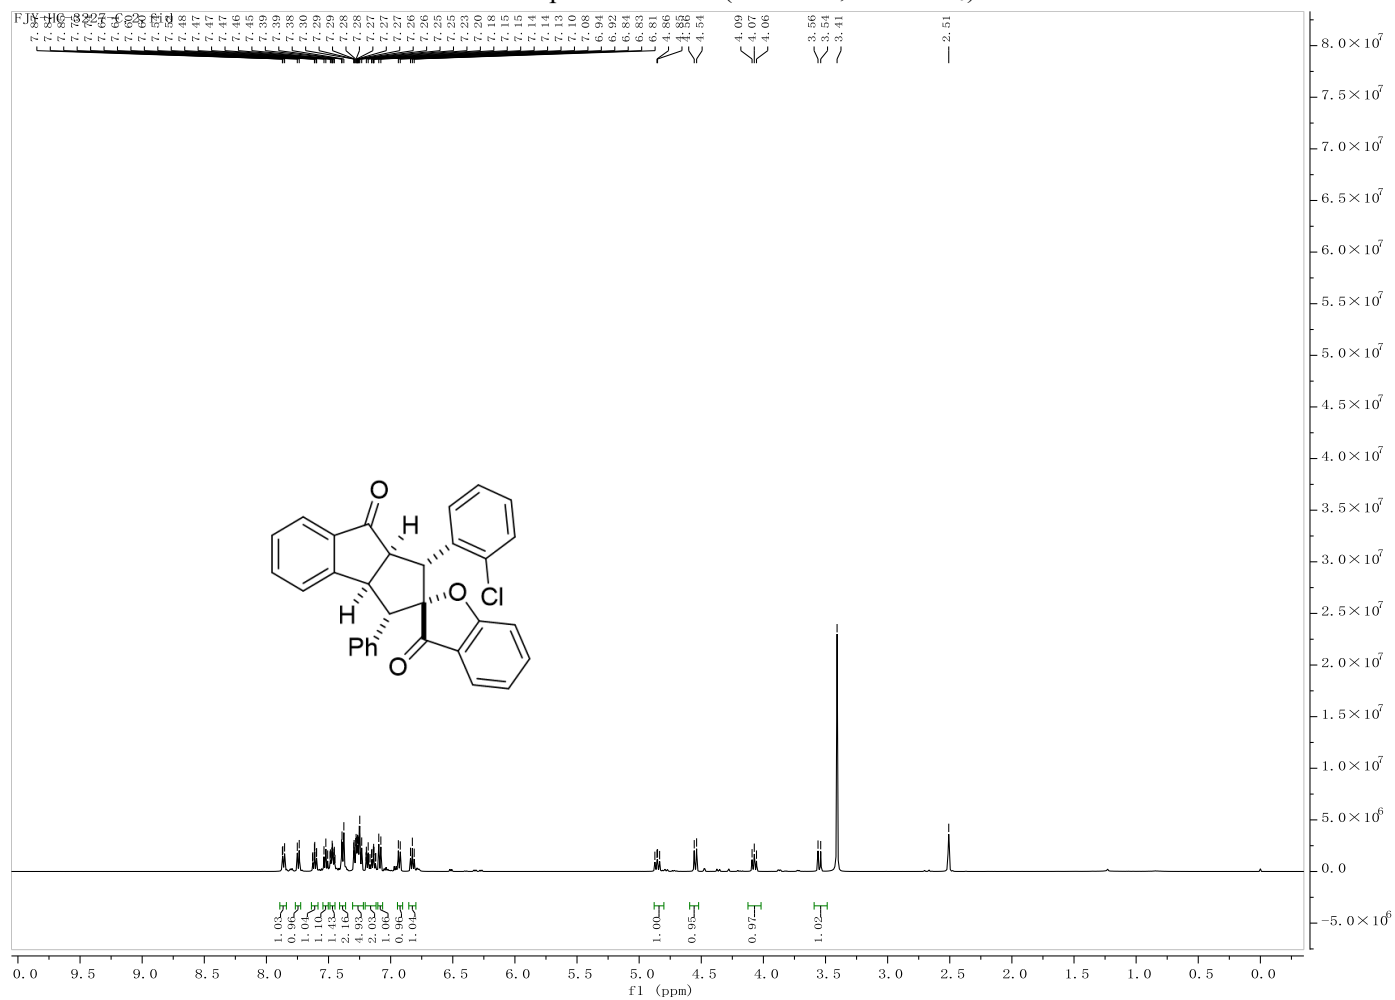



<sup>13</sup>C NMR spectrum of **5m** (125 MHz, DMSO-*d*<sub>6</sub>)

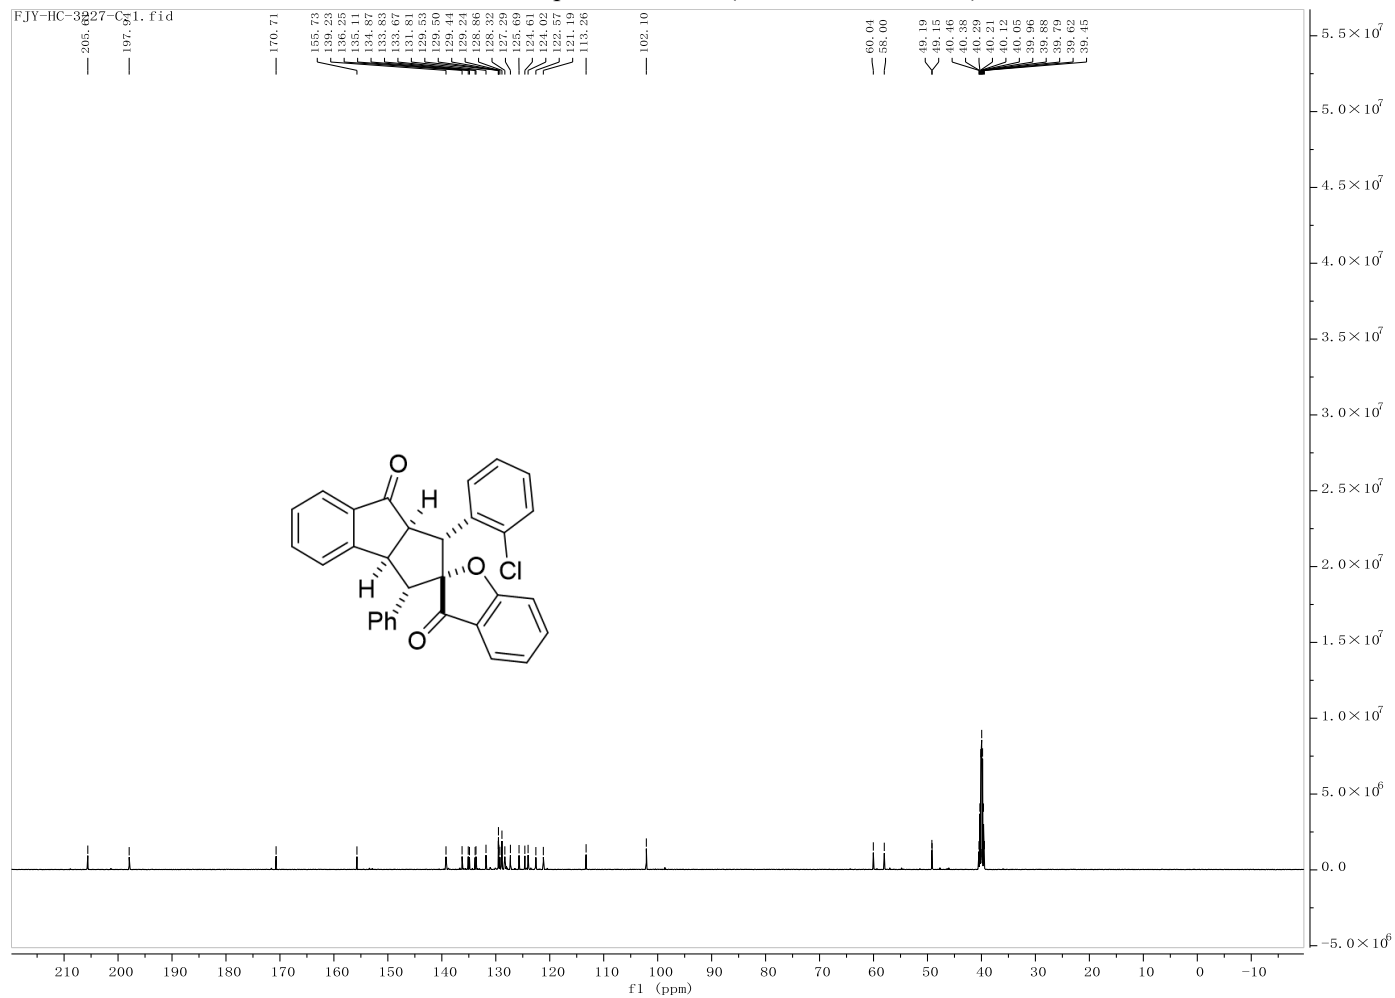

<sup>1</sup>H NMR spectrum of **5n** (400 MHz, DMSO-*d*<sub>6</sub>)

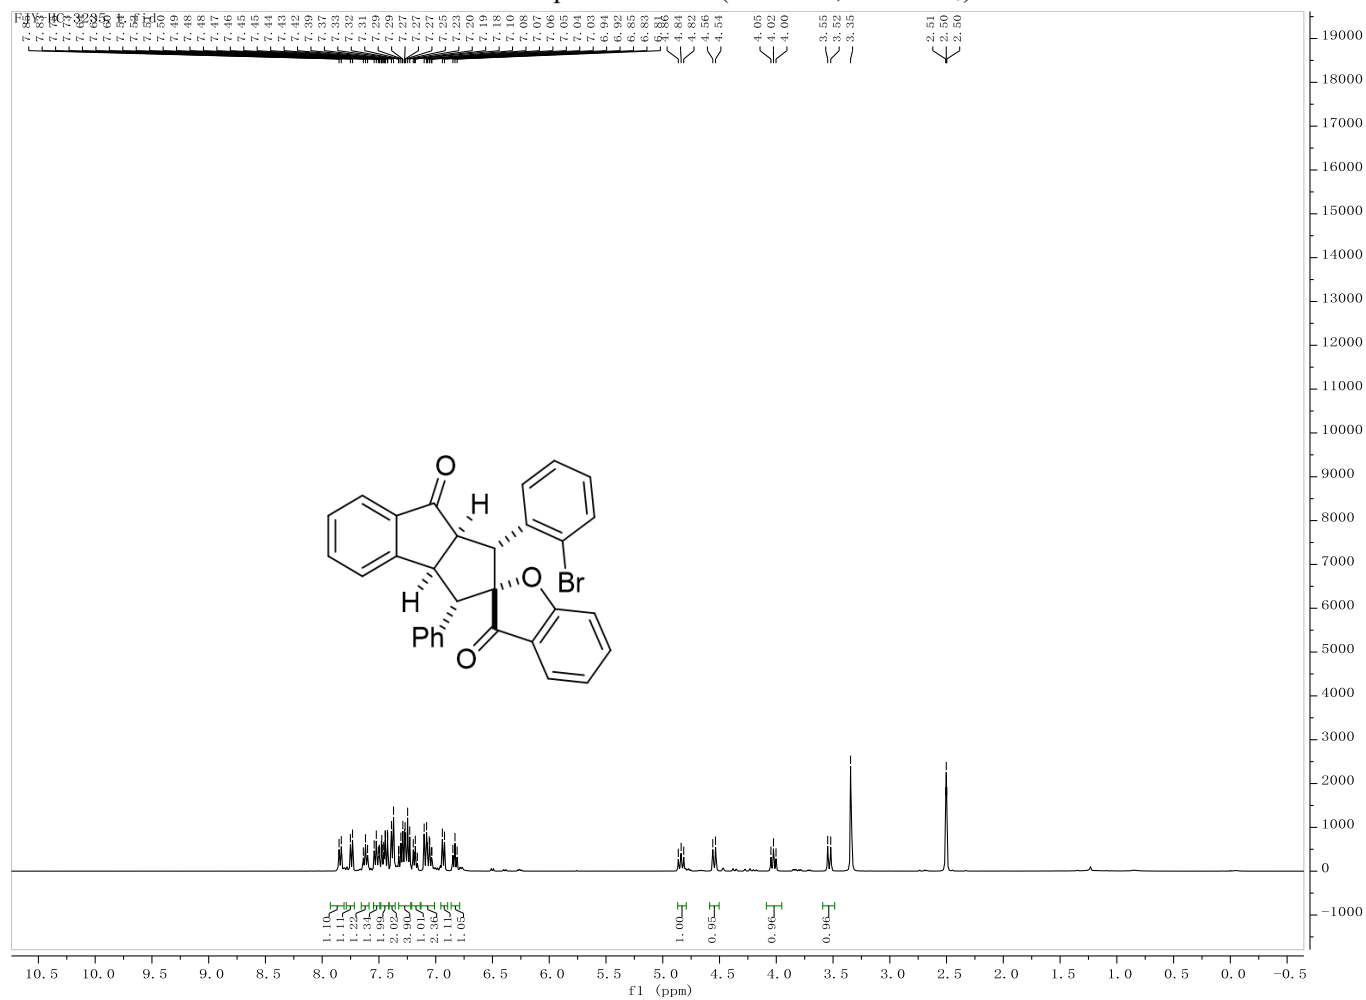

<sup>13</sup>C NMR spectrum of **5n** (125 MHz, DMSO-*d*<sub>6</sub>)

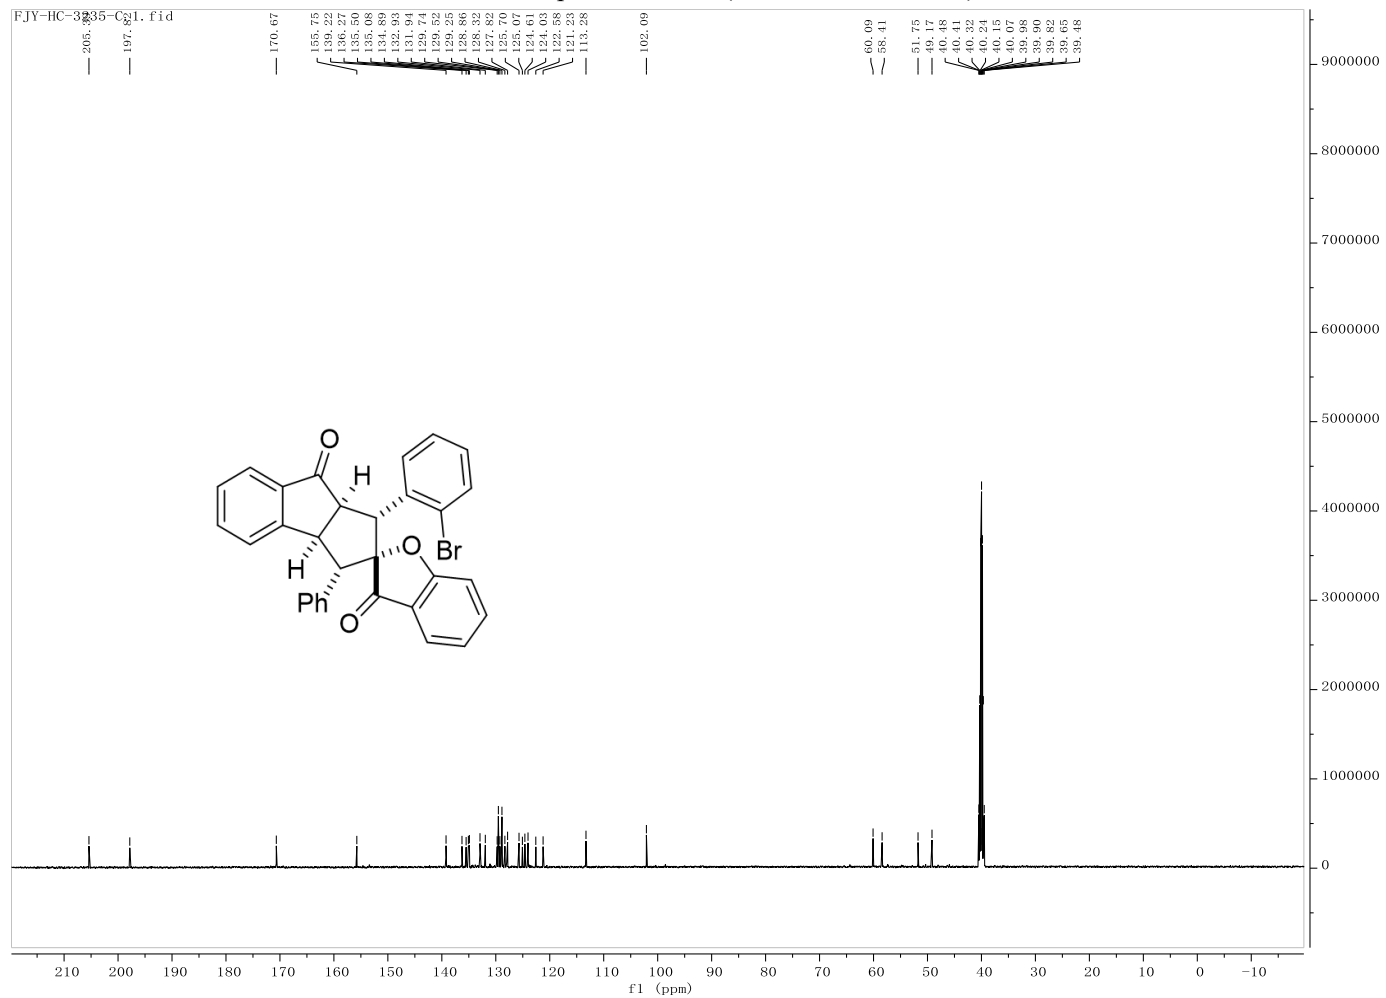

<sup>1</sup>H NMR spectrum of **5o** (500 MHz, CDCl<sub>3</sub>)

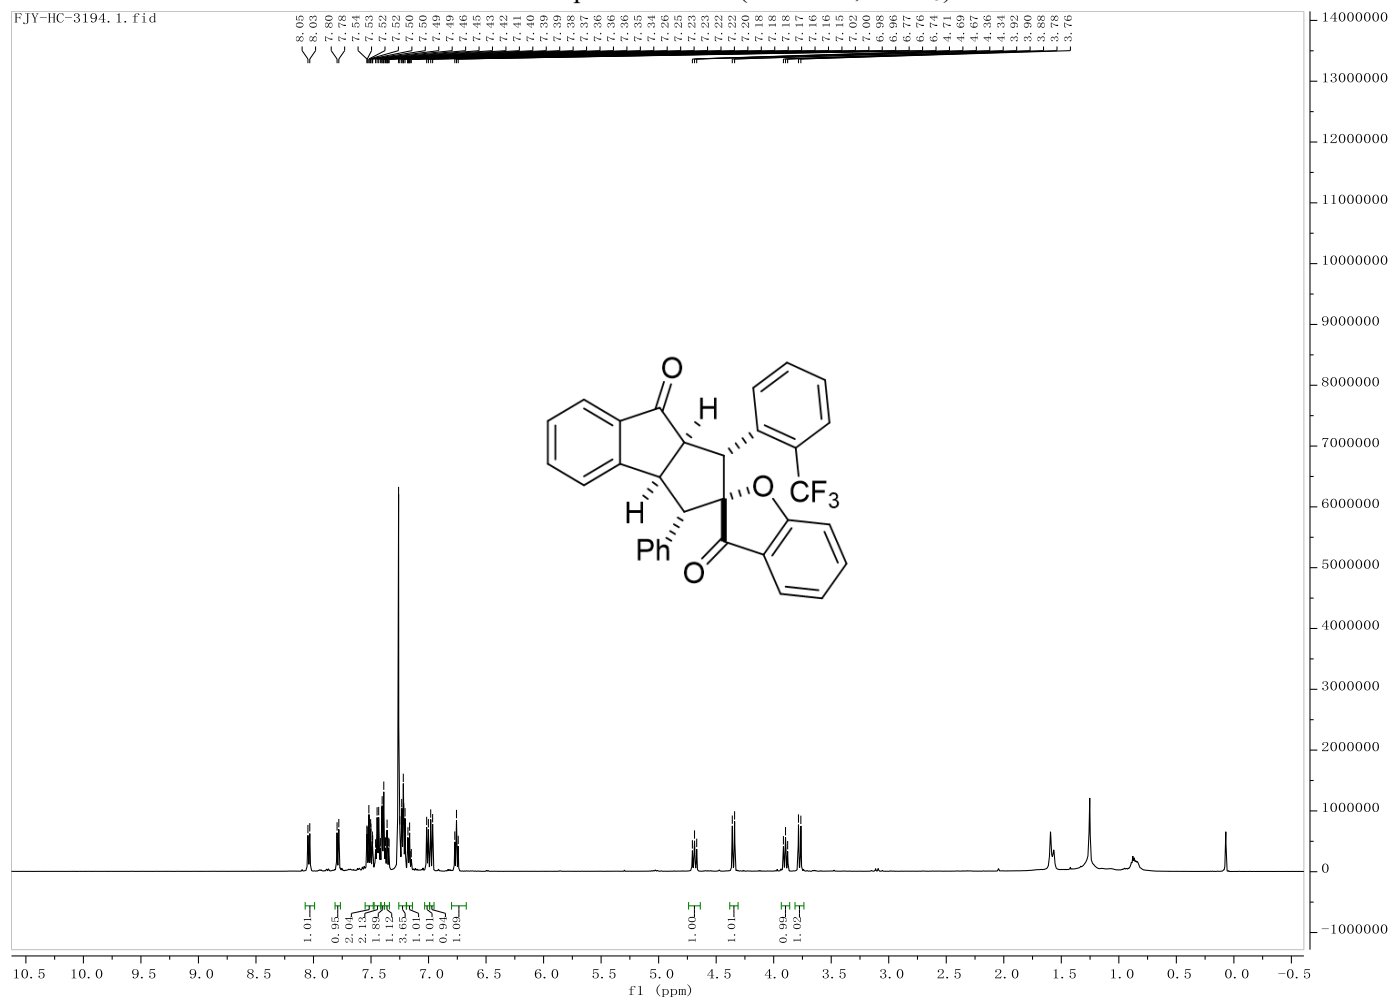

<sup>13</sup>C NMR spectrum of **5o** (125 MHz, DMSO-*d*<sub>6</sub>)

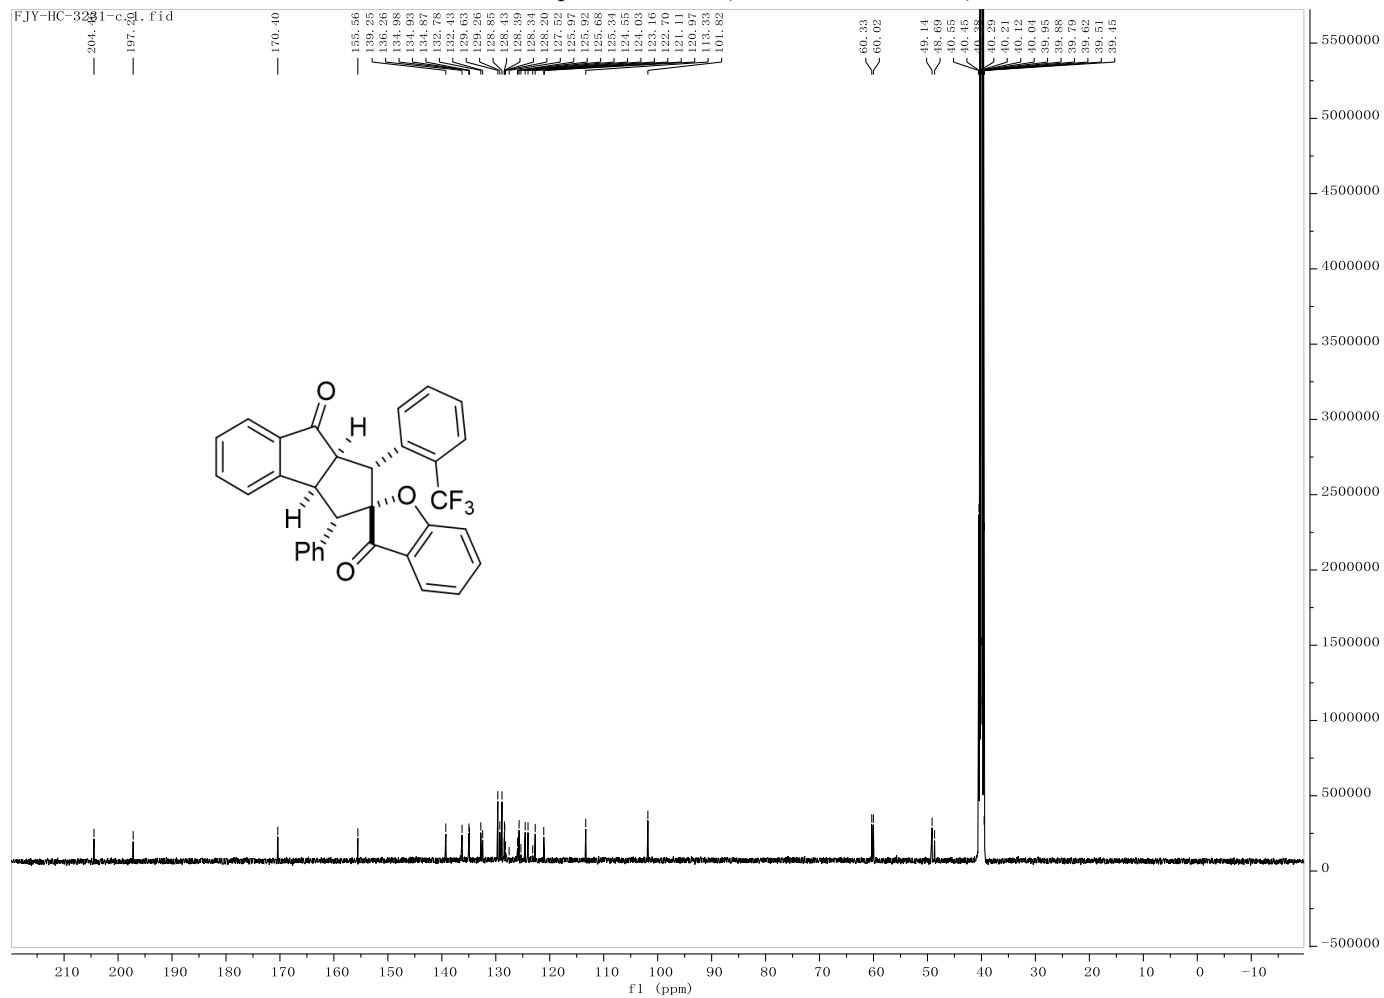

<sup>1</sup>H NMR spectrum of **6** (500 MHz, CDCl<sub>3</sub>)

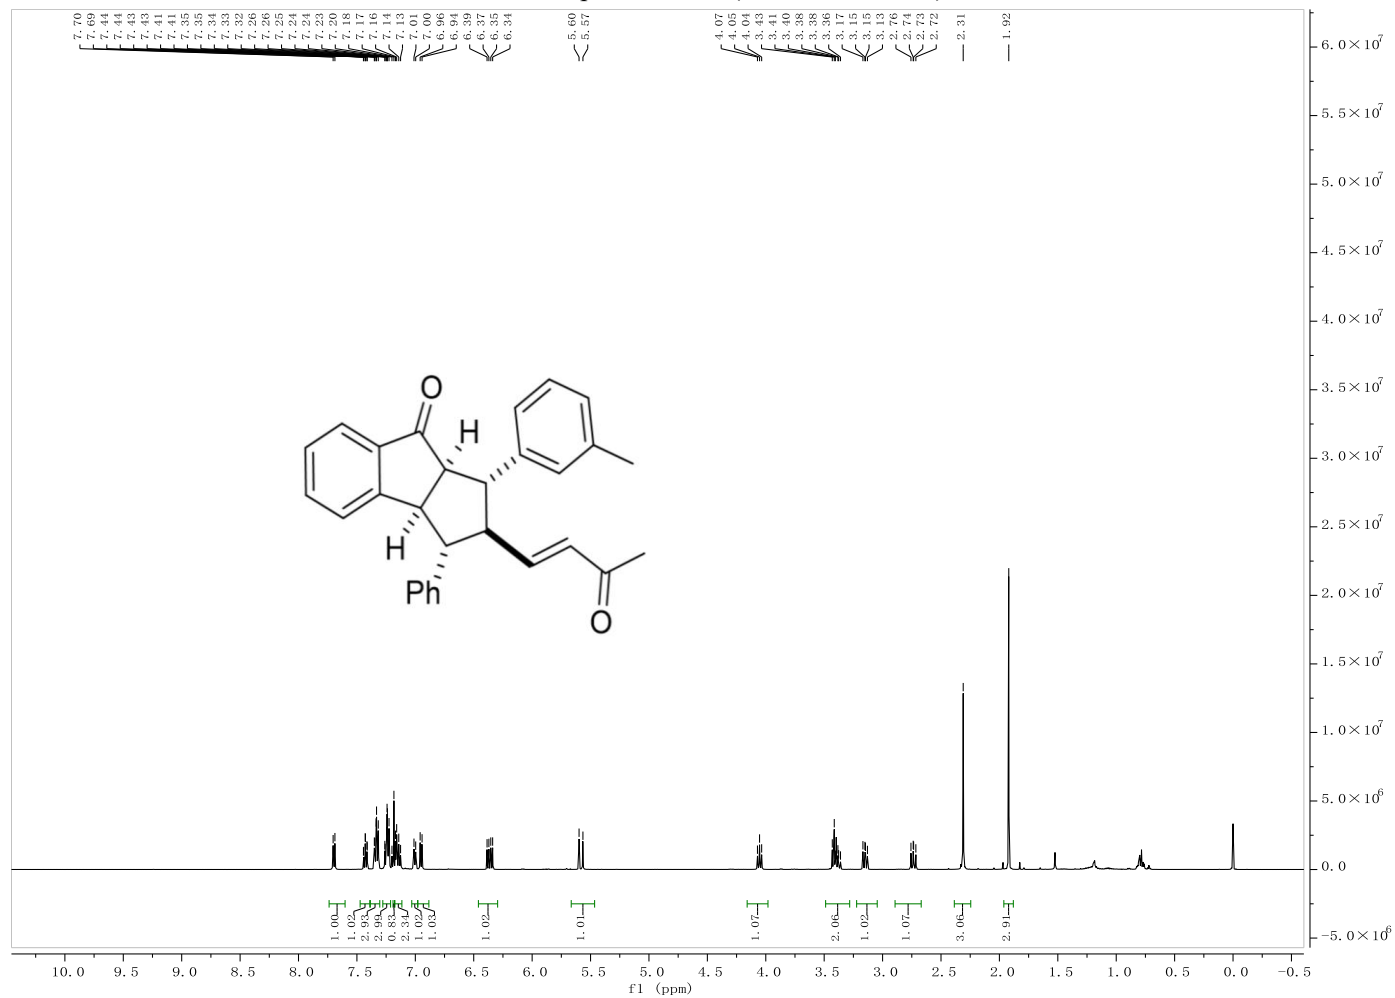

<sup>13</sup>C NMR spectrum of 6 (125 MHz, CDCl<sub>3</sub>)

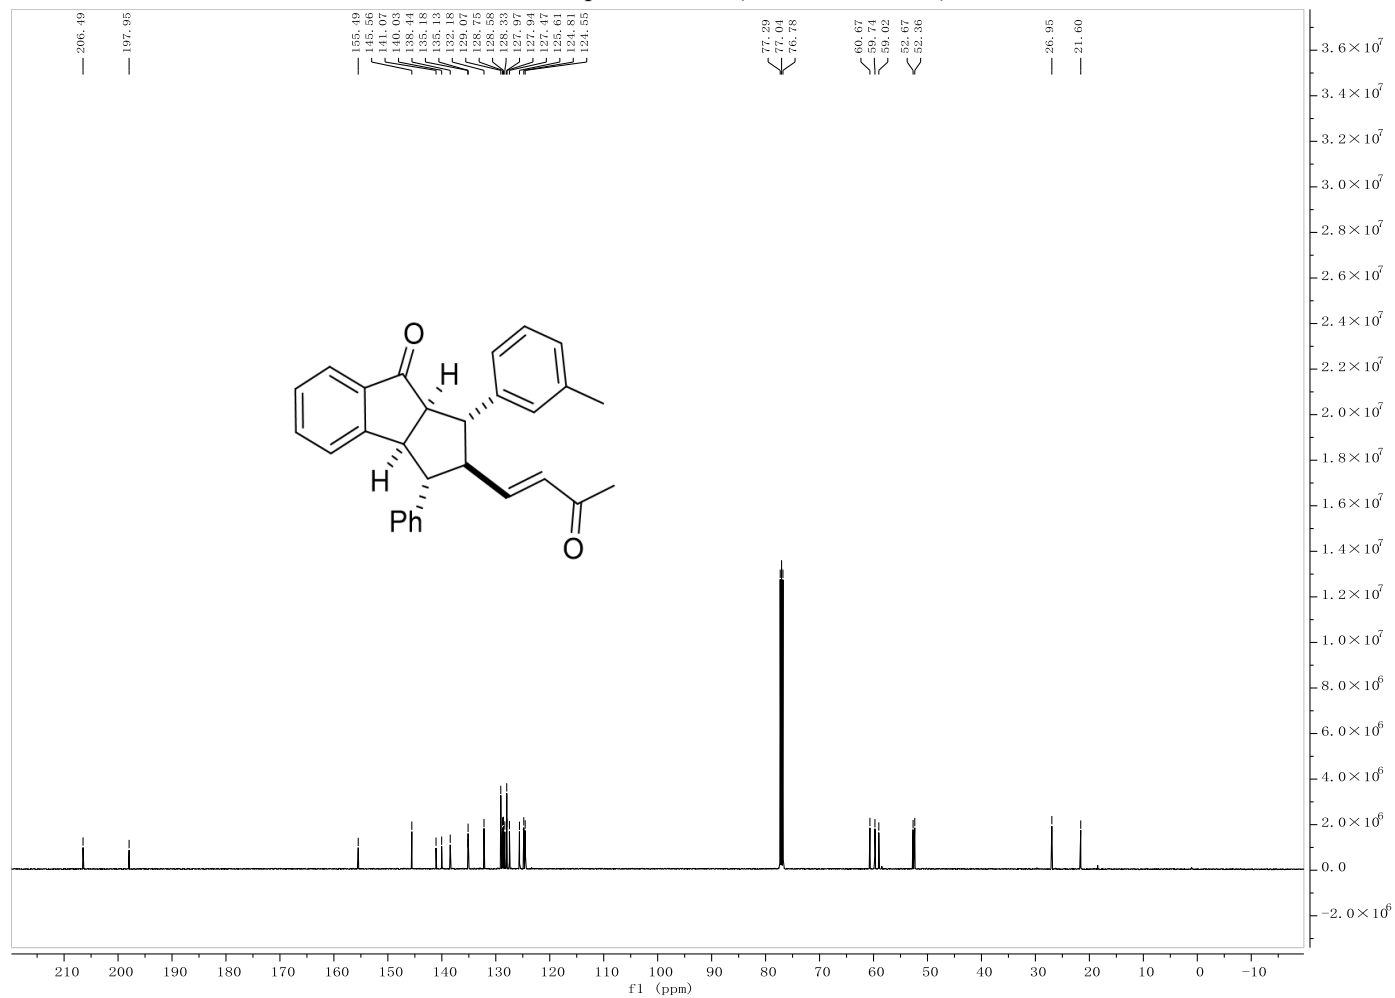

<sup>1</sup>H NMR spectrum of 7 (500 MHz, DMSO-d<sub>6</sub>)

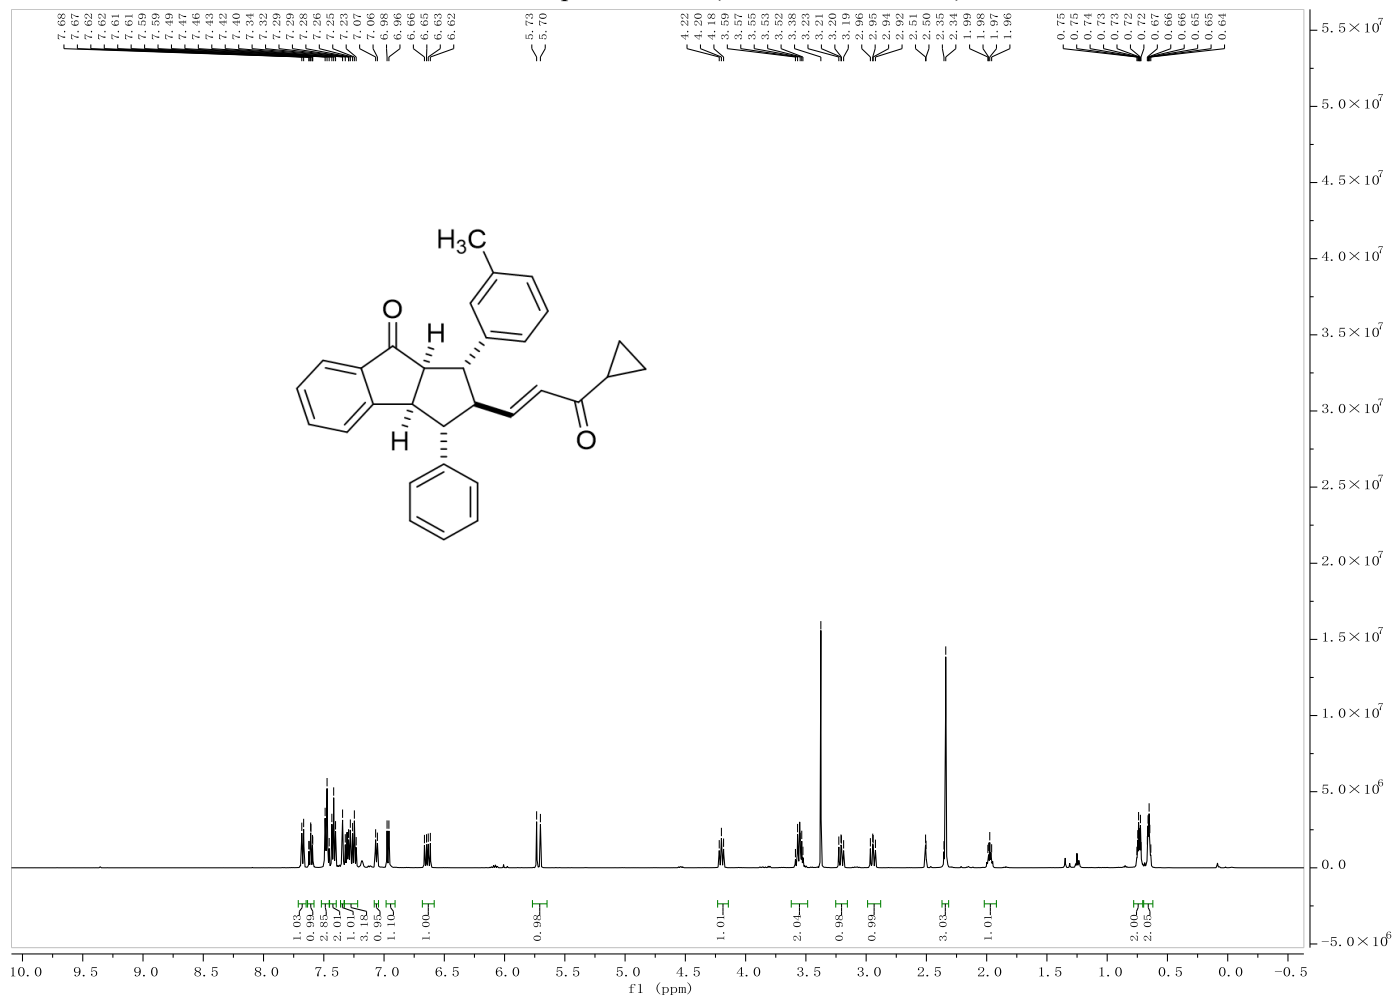



<sup>13</sup>C NMR spectrum of 7 (125 MHz, DMSO-d<sub>6</sub>)

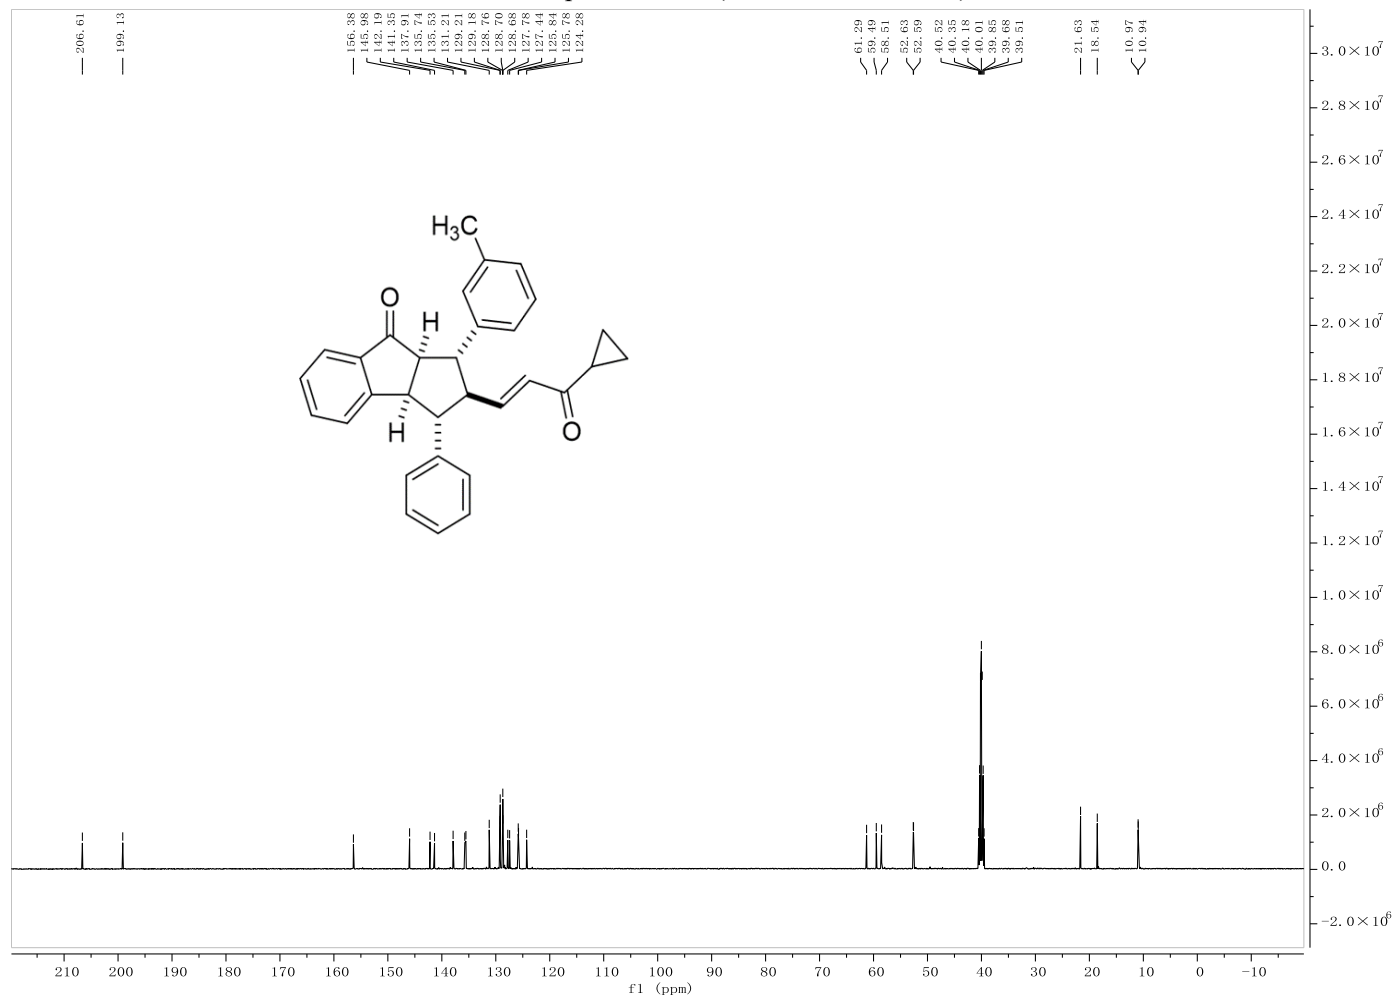

<sup>1</sup>H NMR spectrum of **8** (500 MHz, CDCl<sub>3</sub>)

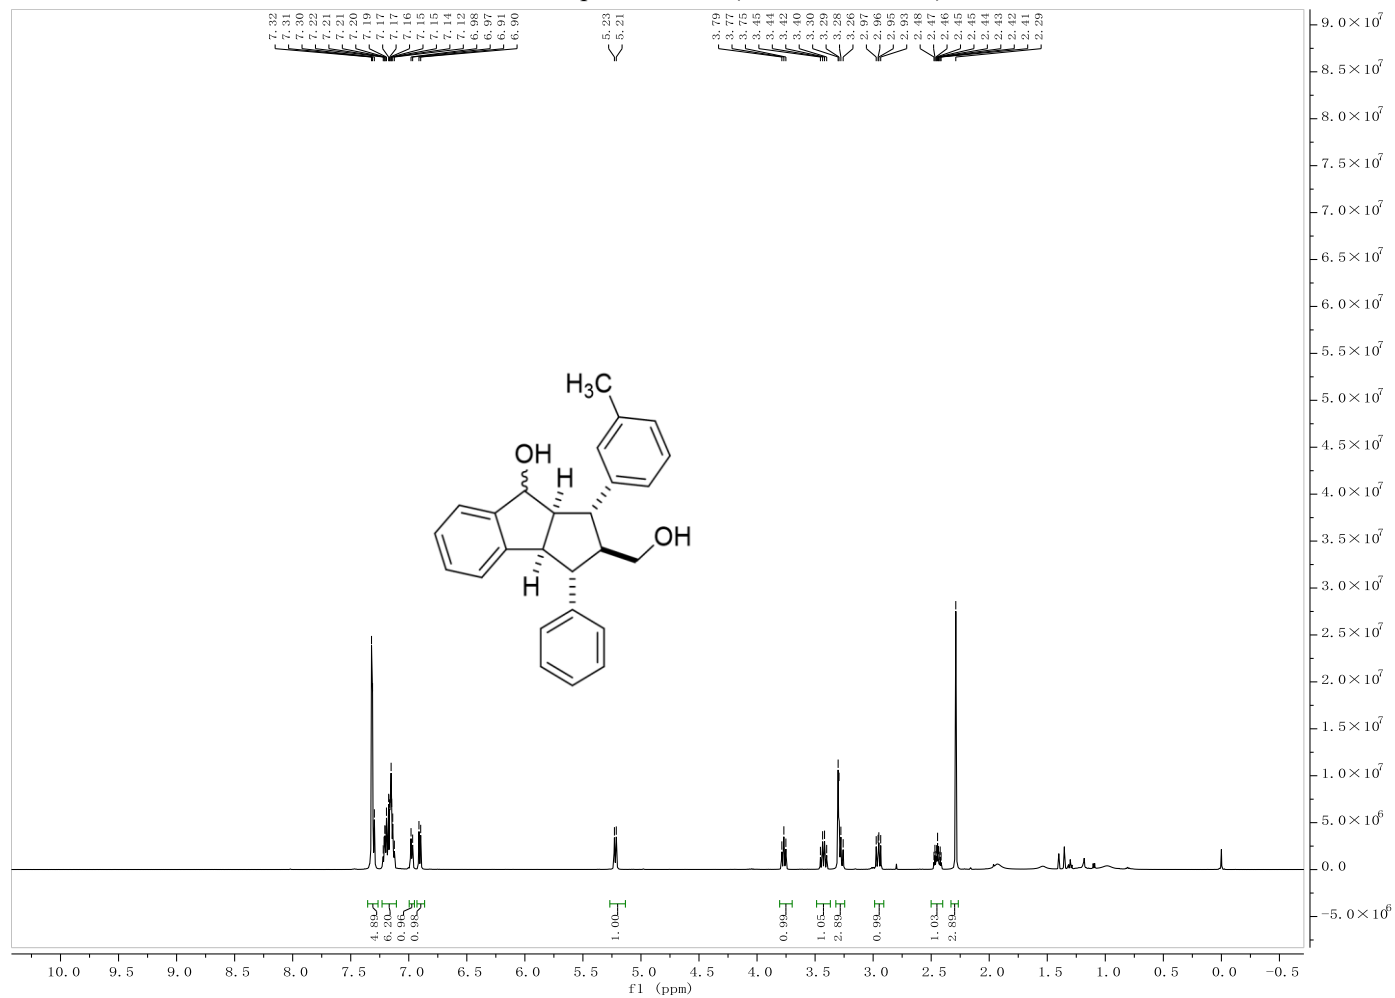

<sup>13</sup>C NMR spectrum of **8** (125 MHz, CDCl<sub>3</sub>)

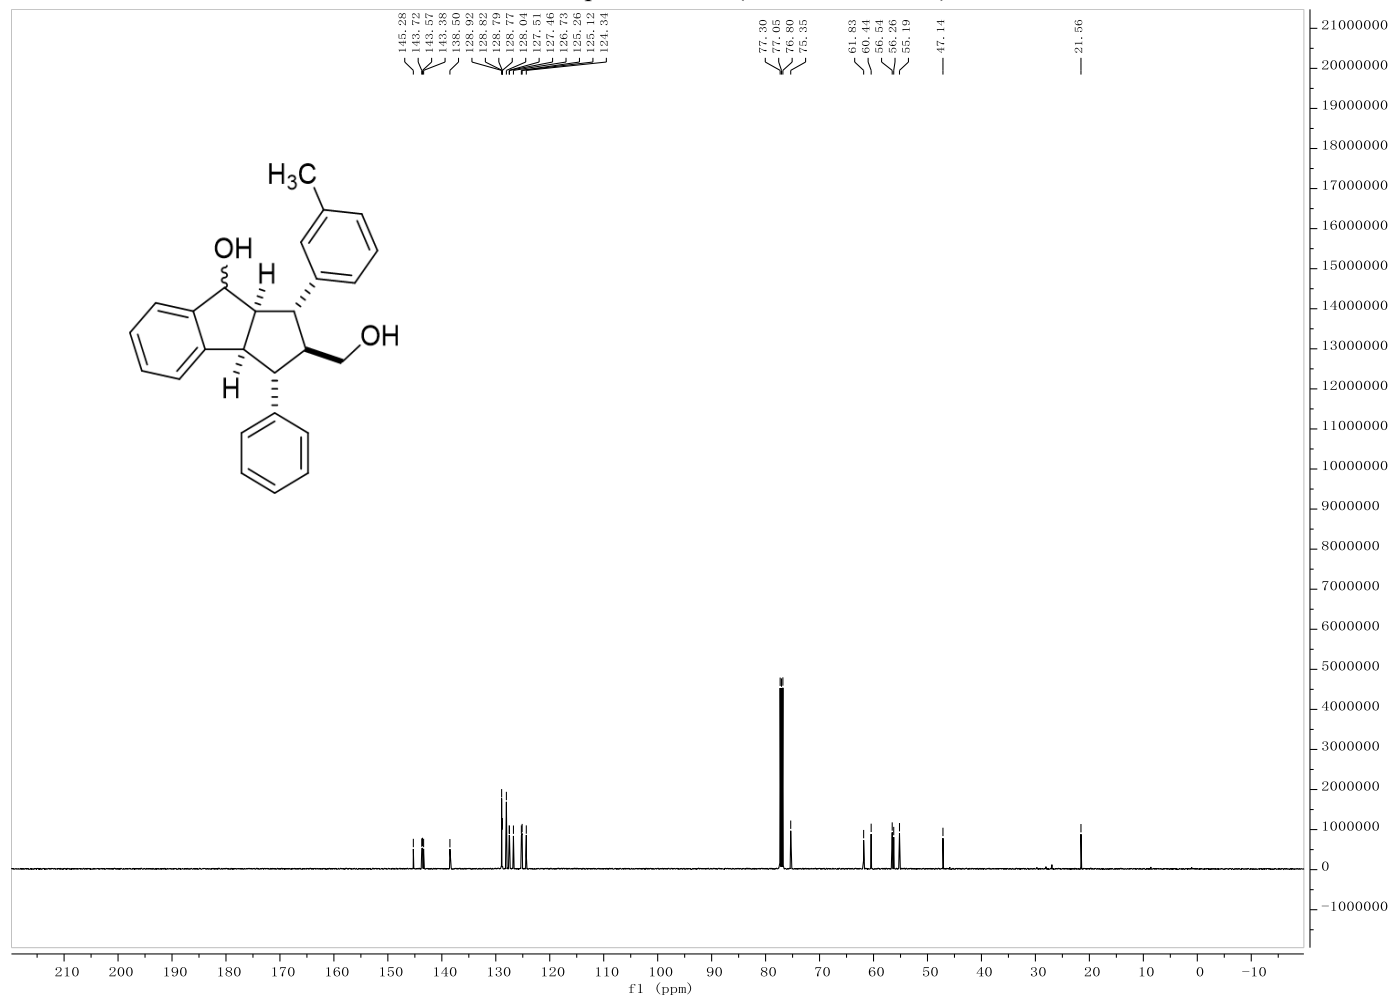

<sup>1</sup>H NMR spectrum of **9** (500 MHz, CDCl<sub>3</sub>)

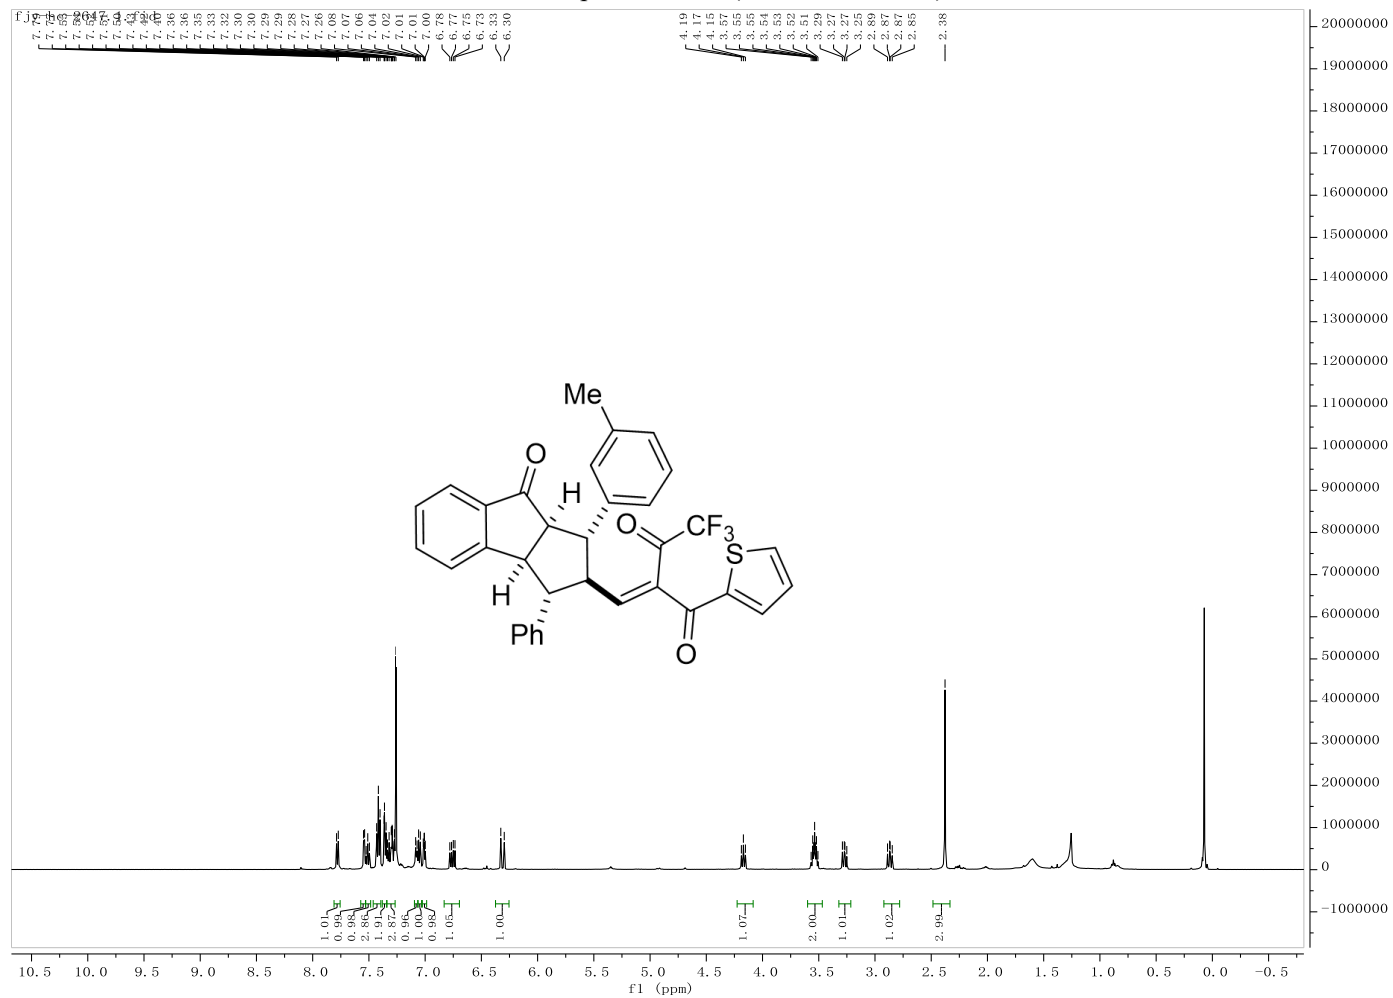

<sup>13</sup>C NMR spectrum of **9** (125 MHz, CDCl<sub>3</sub>)

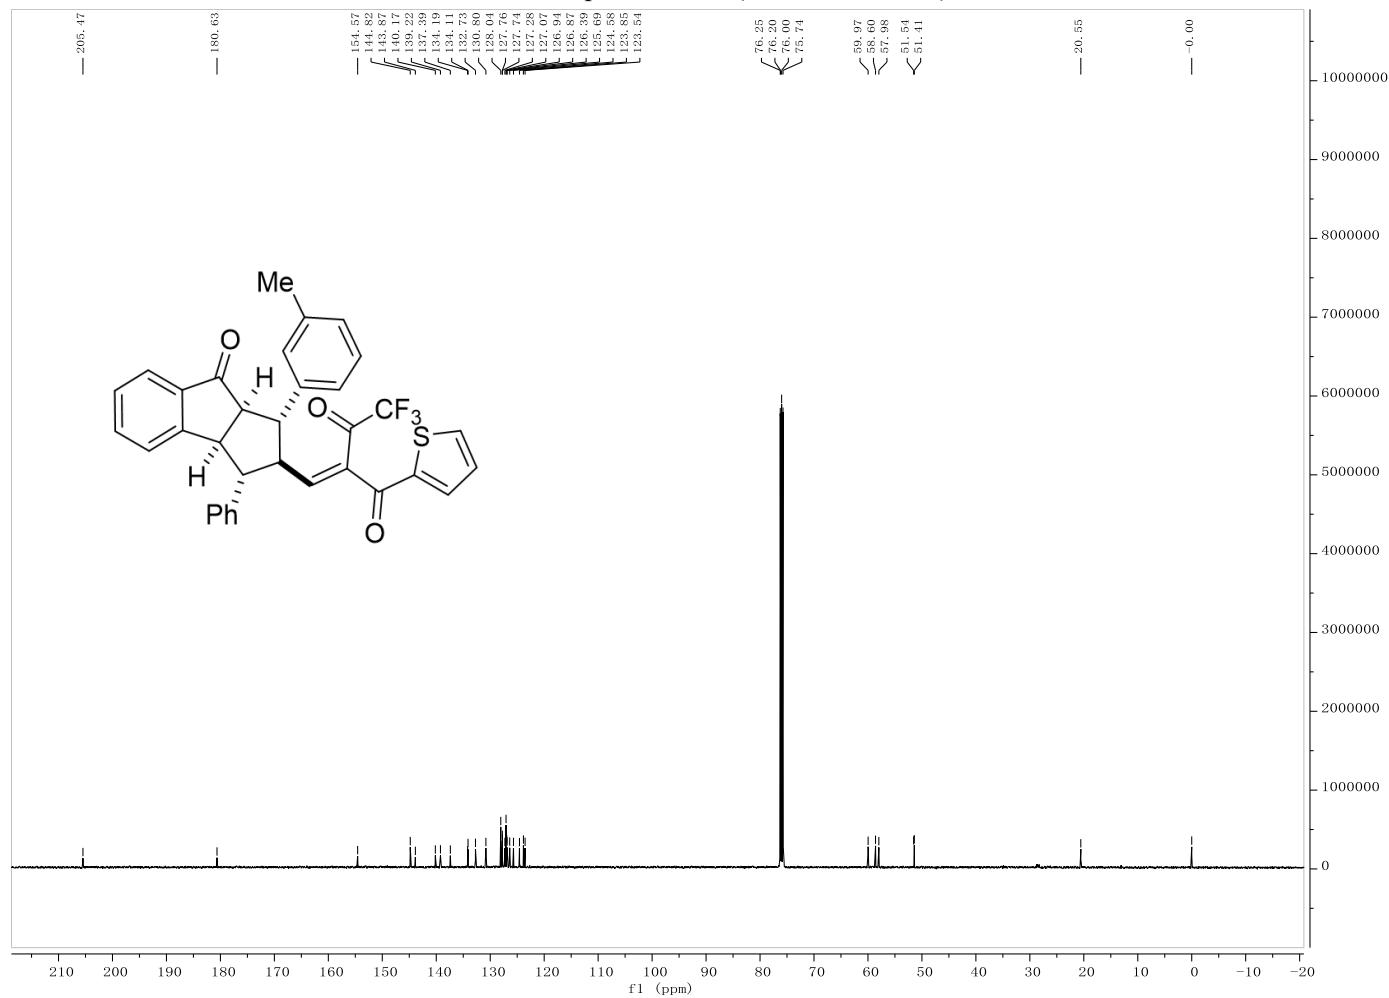

Supplement: d3ob00559c1.pdf [file d3ob00559c1.pdf]
